# Supplementary material for: A high affinity pan-PI3K binding module supports selective targeted protein degradation of PI3Kα
Source: Royal Society of Chemistry journal article supplement (doi:10.1039/d3sc04629j), 2023-12-12
Supplement: d3sc04629j1.xlsx [file d3sc04629j1.xlsx]

## Sheet: PRM
Peptide Sequence	Gene Name	File Name	Peak Area	Total Ion Current Area	Peak Area normalized to Total Ion Current Area	Compound	Concentration / nM	Library Dot Product	Peak Area normalized to Total Ion Current Area normalized to DMSO
LFDAPEAPLPSR	MTOR	001_MSC289_PRM_D22.raw	4746715	368048177152	1.2897e-05	WJ214-14	0	0.9791	1.17354
LFDAPEAPLPSR	MTOR	002_MSC289_PRM_D22.raw	3398120	349124198400	9.73327e-06	WJ214-14	0	0.9789	0.885663
LFDAPEAPLPSR	MTOR	003_MSC289_PRM_D22.raw	3281313	317367123968	1.03392e-05	WJ214-14	0	0.9842	0.940796
LFDAPEAPLPSR	MTOR	013_MSC289_PRM_D22.raw	4469322	423031799808	1.0565e-05	WJ214-14	10000	0.9829	0.961343
LFDAPEAPLPSR	MTOR	014_MSC289_PRM_D22.raw	4294715	443354611712	9.68686e-06	WJ214-14	10000	0.9754	0.88144
LFDAPEAPLPSR	MTOR	015_MSC289_PRM_D22.raw	4629189	332736233472	1.39125e-05	WJ214-14	10000	0.983	1.26594
LFDAPEAPLPSR	MTOR	016_MSC289_PRM_D22.raw	4474916	367171731456	1.21875e-05	WJ214-14	1000	0.9806	1.10898
LFDAPEAPLPSR	MTOR	017_MSC289_PRM_D22.raw	4995894	299599298560	1.66753e-05	WJ214-14	1000	0.9872	1.51734
LFDAPEAPLPSR	MTOR	018_MSC289_PRM_D22.raw	4182683	336536403968	1.24286e-05	WJ214-14	1000	0.9865	1.13092
LFDAPEAPLPSR	MTOR	019_MSC289_PRM_D22.raw	4700083	357550325760	1.31452e-05	WJ214-14	100	0.9865	1.19613
LFDAPEAPLPSR	MTOR	020_MSC289_PRM_D22.raw	4509967	425209757696	1.06065e-05	WJ214-14	100	0.9793	0.965117
LFDAPEAPLPSR	MTOR	021_MSC289_PRM_D22.raw	4720111	378675658752	1.24648e-05	WJ214-14	100	0.9787	1.13421
LFDAPEAPLPSR	MTOR	022_MSC289_PRM_D22.raw	4269347	481121075200	8.87375e-06	WJ214-14	10	0.9817	0.807452
LFDAPEAPLPSR	MTOR	023_MSC289_PRM_D22.raw	4390405	505390858240	8.68715e-06	WJ214-14	10	0.9788	0.790473
LFDAPEAPLPSR	MTOR	024_MSC289_PRM_D22.raw	4701761	477316677632	9.8504e-06	WJ214-14	10	0.9756	0.896321
TLDQSPELR	MTOR	001_MSC289_PRM_D22.raw	3530088	368048177152	9.59137e-06	WJ214-14	0	0.9852	1.11399
TLDQSPELR	MTOR	002_MSC289_PRM_D22.raw	2663773	349124198400	7.62987e-06	WJ214-14	0	0.9785	0.886168
TLDQSPELR	MTOR	003_MSC289_PRM_D22.raw	2732097	317367123968	8.60863e-06	WJ214-14	0	0.9799	0.999846
TLDQSPELR	MTOR	013_MSC289_PRM_D22.raw	3559983	423031799808	8.4154e-06	WJ214-14	10000	0.9693	0.977403
TLDQSPELR	MTOR	014_MSC289_PRM_D22.raw	2852357	443354611712	6.43358e-06	WJ214-14	10000	0.9756	0.747225
TLDQSPELR	MTOR	015_MSC289_PRM_D22.raw	2740211	332736233472	8.23539e-06	WJ214-14	10000	0.9764	0.956495
TLDQSPELR	MTOR	016_MSC289_PRM_D22.raw	2702572	367171731456	7.36051e-06	WJ214-14	1000	0.9895	0.854883
TLDQSPELR	MTOR	017_MSC289_PRM_D22.raw	2886036	299599298560	9.63299e-06	WJ214-14	1000	0.9795	1.11882
TLDQSPELR	MTOR	018_MSC289_PRM_D22.raw	2543725	336536403968	7.55854e-06	WJ214-14	1000	0.9802	0.877884
TLDQSPELR	MTOR	019_MSC289_PRM_D22.raw	2482504	357550325760	6.94309e-06	WJ214-14	100	0.9799	0.806402
TLDQSPELR	MTOR	020_MSC289_PRM_D22.raw	2783977	425209757696	6.5473e-06	WJ214-14	100	0.9728	0.760434
TLDQSPELR	MTOR	021_MSC289_PRM_D22.raw	2731534	378675658752	7.21339e-06	WJ214-14	100	0.9834	0.837796
TLDQSPELR	MTOR	022_MSC289_PRM_D22.raw	3202443	481121075200	6.65621e-06	WJ214-14	10	0.9743	0.773083
TLDQSPELR	MTOR	023_MSC289_PRM_D22.raw	2824120	505390858240	5.58799e-06	WJ214-14	10	0.9335	0.649015
TLDQSPELR	MTOR	024_MSC289_PRM_D22.raw	3195666	477316677632	6.69506e-06	WJ214-14	10	0.9733	0.777595
YHPQALIYPLTVASK	MTOR	001_MSC289_PRM_D22.raw	1630903	368048177152	4.43122e-06	WJ214-14	0	0.9418	1.13738
YHPQALIYPLTVASK	MTOR	002_MSC289_PRM_D22.raw	1295409	349124198400	3.71045e-06	WJ214-14	0	0.9276	0.952378
YHPQALIYPLTVASK	MTOR	003_MSC289_PRM_D22.raw	1125474	317367123968	3.54628e-06	WJ214-14	0	0.9391	0.91024
YHPQALIYPLTVASK	MTOR	013_MSC289_PRM_D22.raw	1813717	423031799808	4.28742e-06	WJ214-14	10000	0.976	1.10047
YHPQALIYPLTVASK	MTOR	014_MSC289_PRM_D22.raw	1636719	443354611712	3.69167e-06	WJ214-14	10000	0.9336	0.947557
YHPQALIYPLTVASK	MTOR	015_MSC289_PRM_D22.raw	1357904	332736233472	4.08102e-06	WJ214-14	10000	0.9692	1.04749
YHPQALIYPLTVASK	MTOR	016_MSC289_PRM_D22.raw	1509633	367171731456	4.11152e-06	WJ214-14	1000	0.9715	1.05532
YHPQALIYPLTVASK	MTOR	017_MSC289_PRM_D22.raw	1292582	299599298560	4.31437e-06	WJ214-14	1000	0.9495	1.10739
YHPQALIYPLTVASK	MTOR	018_MSC289_PRM_D22.raw	1350205	336536403968	4.01206e-06	WJ214-14	1000	0.9562	1.02979
YHPQALIYPLTVASK	MTOR	019_MSC289_PRM_D22.raw	1546613	357550325760	4.32558e-06	WJ214-14	100	0.9881	1.11027
YHPQALIYPLTVASK	MTOR	020_MSC289_PRM_D22.raw	1827115	425209757696	4.29697e-06	WJ214-14	100	0.968	1.10292
YHPQALIYPLTVASK	MTOR	021_MSC289_PRM_D22.raw	1584267	378675658752	4.1837e-06	WJ214-14	100	0.9634	1.07385
YHPQALIYPLTVASK	MTOR	022_MSC289_PRM_D22.raw	1864179	481121075200	3.87466e-06	WJ214-14	10	0.9581	0.994525
YHPQALIYPLTVASK	MTOR	023_MSC289_PRM_D22.raw	2071573	505390858240	4.09895e-06	WJ214-14	10	0.9691	1.0521
YHPQALIYPLTVASK	MTOR	024_MSC289_PRM_D22.raw	1934752	477316677632	4.05339e-06	WJ214-14	10	0.9767	1.0404
ETSFNQAYGR	MTOR	001_MSC289_PRM_D22.raw	1727829	368048177152	4.69457e-06	WJ214-14	0	0.9461	1.00261
ETSFNQAYGR	MTOR	002_MSC289_PRM_D22.raw	1513767	349124198400	4.3359e-06	WJ214-14	0	0.944	0.926005
ETSFNQAYGR	MTOR	003_MSC289_PRM_D22.raw	1592117	317367123968	5.01664e-06	WJ214-14	0	0.9523	1.07139
ETSFNQAYGR	MTOR	013_MSC289_PRM_D22.raw	2019153	423031799808	4.77305e-06	WJ214-14	10000	0.9494	1.01937
ETSFNQAYGR	MTOR	014_MSC289_PRM_D22.raw	1876514	443354611712	4.23254e-06	WJ214-14	10000	0.9423	0.90393
ETSFNQAYGR	MTOR	015_MSC289_PRM_D22.raw	1607384	332736233472	4.83081e-06	WJ214-14	10000	0.954	1.0317
ETSFNQAYGR	MTOR	016_MSC289_PRM_D22.raw	1398320	367171731456	3.80835e-06	WJ214-14	1000	0.9572	0.813339
ETSFNQAYGR	MTOR	017_MSC289_PRM_D22.raw	1524978	299599298560	5.09006e-06	WJ214-14	1000	0.9477	1.08707
ETSFNQAYGR	MTOR	018_MSC289_PRM_D22.raw	1393062	336536403968	4.13941e-06	WJ214-14	1000	0.9464	0.884041
ETSFNQAYGR	MTOR	019_MSC289_PRM_D22.raw	1627319	357550325760	4.5513e-06	WJ214-14	100	0.9344	0.972008
ETSFNQAYGR	MTOR	020_MSC289_PRM_D22.raw	1771338	425209757696	4.1658e-06	WJ214-14	100	0.9484	0.889677
ETSFNQAYGR	MTOR	021_MSC289_PRM_D22.raw	1675409	378675658752	4.42439e-06	WJ214-14	100	0.9487	0.944904
ETSFNQAYGR	MTOR	022_MSC289_PRM_D22.raw	2044716	481121075200	4.2499e-06	WJ214-14	10	0.9466	0.907638
ETSFNQAYGR	MTOR	023_MSC289_PRM_D22.raw	2094525	505390858240	4.14437e-06	WJ214-14	10	0.9498	0.8851
ETSFNQAYGR	MTOR	024_MSC289_PRM_D22.raw	1840025	477316677632	3.85494e-06	WJ214-14	10	0.9438	0.823287
DLELAVPGTYDPNQPIIR	MTOR	001_MSC289_PRM_D22.raw	2386834	368048177152	6.48511e-06	WJ214-14	0	0.9689	1.13238
DLELAVPGTYDPNQPIIR	MTOR	002_MSC289_PRM_D22.raw	1820604	349124198400	5.21477e-06	WJ214-14	0	0.9814	0.910561
DLELAVPGTYDPNQPIIR	MTOR	003_MSC289_PRM_D22.raw	1739519	317367123968	5.48109e-06	WJ214-14	0	0.9767	0.957063
DLELAVPGTYDPNQPIIR	MTOR	013_MSC289_PRM_D22.raw	2318824	423031799808	5.48144e-06	WJ214-14	10000	0.971	0.957124
DLELAVPGTYDPNQPIIR	MTOR	014_MSC289_PRM_D22.raw	2130118	443354611712	4.80455e-06	WJ214-14	10000	0.9739	0.83893
DLELAVPGTYDPNQPIIR	MTOR	015_MSC289_PRM_D22.raw	1936850	332736233472	5.82098e-06	WJ214-14	10000	0.9848	1.01641
DLELAVPGTYDPNQPIIR	MTOR	016_MSC289_PRM_D22.raw	1793684	367171731456	4.88514e-06	WJ214-14	1000	0.9802	0.853002
DLELAVPGTYDPNQPIIR	MTOR	017_MSC289_PRM_D22.raw	1916710	299599298560	6.39758e-06	WJ214-14	1000	0.9856	1.11709
DLELAVPGTYDPNQPIIR	MTOR	018_MSC289_PRM_D22.raw	1834374	336536403968	5.45074e-06	WJ214-14	1000	0.9785	0.951764
DLELAVPGTYDPNQPIIR	MTOR	019_MSC289_PRM_D22.raw	1995110	357550325760	5.57994e-06	WJ214-14	100	0.9733	0.974323
DLELAVPGTYDPNQPIIR	MTOR	020_MSC289_PRM_D22.raw	2055742	425209757696	4.83465e-06	WJ214-14	100	0.9618	0.844187
DLELAVPGTYDPNQPIIR	MTOR	021_MSC289_PRM_D22.raw	2092427	378675658752	5.52564e-06	WJ214-14	100	0.9628	0.964842
DLELAVPGTYDPNQPIIR	MTOR	022_MSC289_PRM_D22.raw	2128799	481121075200	4.42466e-06	WJ214-14	10	0.9827	0.772598
DLELAVPGTYDPNQPIIR	MTOR	023_MSC289_PRM_D22.raw	2385821	505390858240	4.72074e-06	WJ214-14	10	0.9729	0.824297
DLELAVPGTYDPNQPIIR	MTOR	024_MSC289_PRM_D22.raw	2183527	477316677632	4.57459e-06	WJ214-14	10	0.9745	0.798776
LFDAPEAPLPSR	MTOR	001_MSC274_PRM_D22.raw	5125211	337336074240	1.51932e-05	WJ213-14	0	0.9848	1.04662
LFDAPEAPLPSR	MTOR	002_MSC274_PRM_D22.raw	4723216	323030679552	1.46216e-05	WJ213-14	0	0.9845	1.00724
LFDAPEAPLPSR	MTOR	003_MSC274_PRM_D22.raw	5030617	366277132288	1.37345e-05	WJ213-14	0	0.9826	0.946133
LFDAPEAPLPSR	MTOR	004_MSC274_PRM_D22.raw	3670083	202785210368	1.80984e-05	WJ213-14	10000	0.9862	1.24675
LFDAPEAPLPSR	MTOR	005_MSC274_PRM_D22.raw	4295952	227234480128	1.89054e-05	WJ213-14	10000	0.9811	1.30235
LFDAPEAPLPSR	MTOR	006_MSC274_PRM_D22.raw	4198360	219833450496	1.90979e-05	WJ213-14	10000	0.9857	1.31561
LFDAPEAPLPSR	MTOR	007_MSC274_PRM_D22.raw	5971102	341204598784	1.75001e-05	WJ213-14	1000	0.9855	1.20554
LFDAPEAPLPSR	MTOR	008_MSC274_PRM_D22.raw	4904824	364720914432	1.34482e-05	WJ213-14	1000	0.98	0.926411
LFDAPEAPLPSR	MTOR	009_MSC274_PRM_D22.raw	6281507	377121931264	1.66564e-05	WJ213-14	1000	0.9847	1.14742
LFDAPEAPLPSR	MTOR	010_MSC274_PRM_D22.raw	6300513	357457821696	1.76259e-05	WJ213-14	100	0.9778	1.21421
LFDAPEAPLPSR	MTOR	011_MSC274_PRM_D22.raw	5487119	420418945024	1.30516e-05	WJ213-14	100	0.9876	0.89909
LFDAPEAPLPSR	MTOR	012_MSC274_PRM_D22.raw	6176328	392504999936	1.57357e-05	WJ213-14	100	0.9819	1.08399
LFDAPEAPLPSR	MTOR	013_MSC274_PRM_D22.raw	6844668	442199343104	1.54787e-05	WJ213-14	10	0.985	1.06629
LFDAPEAPLPSR	MTOR	014_MSC274_PRM_D22.raw	6892825	428330188800	1.60923e-05	WJ213-14	10	0.98	1.10856
LFDAPEAPLPSR	MTOR	015_MSC274_PRM_D22.raw	7040748	400532373504	1.75785e-05	WJ213-14	10	0.9823	1.21094
LFDAPEAPLPSR	MTOR	016_MSC274_PRM_D22.raw	6576033	398537490432	1.65004e-05	WJ213-14	1	0.9899	1.13667
LFDAPEAPLPSR	MTOR	017_MSC274_PRM_D22.raw	6638998	374449340416	1.773e-05	WJ213-14	1	0.9861	1.22138
LFDAPEAPLPSR	MTOR	018_MSC274_PRM_D22.raw	7326129	453997297664	1.61369e-05	WJ213-14	1	0.9854	1.11163
LFDAPEAPLPSR	MTOR	019_MSC274_PRM_D22.raw	6472865	390866042880	1.65603e-05	WJ213-14	0.1	0.9819	1.1408
LFDAPEAPLPSR	MTOR	020_MSC274_PRM_D22.raw	7915561	465672863744	1.69981e-05	WJ213-14	0.1	0.9836	1.17096
LFDAPEAPLPSR	MTOR	021_MSC274_PRM_D22.raw	7481926	425007546368	1.76042e-05	WJ213-14	0.1	0.9886	1.21271
TLDQSPELR	MTOR	001_MSC274_PRM_D22.raw	2767083	337336074240	8.20275e-06	WJ213-14	0	0.977	1.02307
TLDQSPELR	MTOR	002_MSC274_PRM_D22.raw	2537817	323030679552	7.85627e-06	WJ213-14	0	0.9727	0.979856
TLDQSPELR	MTOR	003_MSC274_PRM_D22.raw	2928135	366277132288	7.99432e-06	WJ213-14	0	0.9828	0.997074
TLDQSPELR	MTOR	004_MSC274_PRM_D22.raw	2028026	202785210368	1.00009e-05	WJ213-14	10000	0.9833	1.24734
TLDQSPELR	MTOR	005_MSC274_PRM_D22.raw	2414877	227234480128	1.06272e-05	WJ213-14	10000	0.9846	1.32546
TLDQSPELR	MTOR	006_MSC274_PRM_D22.raw	2413220	219833450496	1.09775e-05	WJ213-14	10000	0.9808	1.36914
TLDQSPELR	MTOR	007_MSC274_PRM_D22.raw	3027597	341204598784	8.87326e-06	WJ213-14	1000	0.9862	1.1067
TLDQSPELR	MTOR	008_MSC274_PRM_D22.raw	2787580	364720914432	7.64305e-06	WJ213-14	1000	0.9709	0.953263
TLDQSPELR	MTOR	009_MSC274_PRM_D22.raw	3499762	377121931264	9.28019e-06	WJ213-14	1000	0.9808	1.15745
TLDQSPELR	MTOR	010_MSC274_PRM_D22.raw	3487608	357457821696	9.7567e-06	WJ213-14	100	0.9766	1.21688
TLDQSPELR	MTOR	011_MSC274_PRM_D22.raw	2989092	420418945024	7.10979e-06	WJ213-14	100	0.985	0.886754
TLDQSPELR	MTOR	012_MSC274_PRM_D22.raw	3059647	392504999936	7.79518e-06	WJ213-14	100	0.991	0.972237
TLDQSPELR	MTOR	013_MSC274_PRM_D22.raw	3379381	442199343104	7.64221e-06	WJ213-14	10	0.9752	0.953158
TLDQSPELR	MTOR	014_MSC274_PRM_D22.raw	3551869	428330188800	8.29236e-06	WJ213-14	10	0.976	1.03425
TLDQSPELR	MTOR	015_MSC274_PRM_D22.raw	3266632	400532373504	8.15573e-06	WJ213-14	10	0.9689	1.01721
TLDQSPELR	MTOR	016_MSC274_PRM_D22.raw	3387598	398537490432	8.50007e-06	WJ213-14	1	0.9828	1.06015
TLDQSPELR	MTOR	017_MSC274_PRM_D22.raw	3465554	374449340416	9.25507e-06	WJ213-14	1	0.9792	1.15432
TLDQSPELR	MTOR	018_MSC274_PRM_D22.raw	3659831	453997297664	8.06135e-06	WJ213-14	1	0.9786	1.00543
TLDQSPELR	MTOR	019_MSC274_PRM_D22.raw	3002968	390866042880	7.68286e-06	WJ213-14	0.1	0.9775	0.958228
TLDQSPELR	MTOR	020_MSC274_PRM_D22.raw	3680872	465672863744	7.90442e-06	WJ213-14	0.1	0.9786	0.985861
TLDQSPELR	MTOR	021_MSC274_PRM_D22.raw	3577393	425007546368	8.41725e-06	WJ213-14	0.1	0.9698	1.04982
YHPQALIYPLTVASK	MTOR	001_MSC274_PRM_D22.raw	1455125	337336074240	4.31358e-06	WJ213-14	0	0.9634	1.07626
YHPQALIYPLTVASK	MTOR	002_MSC274_PRM_D22.raw	1262983	323030679552	3.90979e-06	WJ213-14	0	0.9853	0.97551
YHPQALIYPLTVASK	MTOR	003_MSC274_PRM_D22.raw	1392024	366277132288	3.80047e-06	WJ213-14	0	0.9812	0.948233
YHPQALIYPLTVASK	MTOR	004_MSC274_PRM_D22.raw	761873	202785210368	3.75704e-06	WJ213-14	10000	0.9784	0.937399
YHPQALIYPLTVASK	MTOR	005_MSC274_PRM_D22.raw	970170	227234480128	4.26947e-06	WJ213-14	10000	0.9815	1.06525
YHPQALIYPLTVASK	MTOR	006_MSC274_PRM_D22.raw	820504	219833450496	3.73239e-06	WJ213-14	10000	0.98	0.931248
YHPQALIYPLTVASK	MTOR	007_MSC274_PRM_D22.raw	1598041	341204598784	4.68353e-06	WJ213-14	1000	0.9529	1.16856
YHPQALIYPLTVASK	MTOR	008_MSC274_PRM_D22.raw	1592365	364720914432	4.36598e-06	WJ213-14	1000	0.9669	1.08933
YHPQALIYPLTVASK	MTOR	009_MSC274_PRM_D22.raw	1534767	377121931264	4.06968e-06	WJ213-14	1000	0.9872	1.0154
YHPQALIYPLTVASK	MTOR	010_MSC274_PRM_D22.raw	1654992	357457821696	4.62989e-06	WJ213-14	100	0.9844	1.15518
YHPQALIYPLTVASK	MTOR	011_MSC274_PRM_D22.raw	1809621	420418945024	4.30433e-06	WJ213-14	100	0.9805	1.07395
YHPQALIYPLTVASK	MTOR	012_MSC274_PRM_D22.raw	1455435	392504999936	3.70807e-06	WJ213-14	100	0.9812	0.925179
YHPQALIYPLTVASK	MTOR	013_MSC274_PRM_D22.raw	1763240	442199343104	3.98743e-06	WJ213-14	10	0.9727	0.994882
YHPQALIYPLTVASK	MTOR	014_MSC274_PRM_D22.raw	1628308	428330188800	3.80153e-06	WJ213-14	10	0.9597	0.948497
YHPQALIYPLTVASK	MTOR	015_MSC274_PRM_D22.raw	1429459	400532373504	3.5689e-06	WJ213-14	10	0.9837	0.890456
YHPQALIYPLTVASK	MTOR	016_MSC274_PRM_D22.raw	1589953	398537490432	3.98947e-06	WJ213-14	1	0.9799	0.99539
YHPQALIYPLTVASK	MTOR	017_MSC274_PRM_D22.raw	1455785	374449340416	3.8878e-06	WJ213-14	1	0.9704	0.970024
YHPQALIYPLTVASK	MTOR	018_MSC274_PRM_D22.raw	1575431	453997297664	3.47013e-06	WJ213-14	1	0.971	0.865813
YHPQALIYPLTVASK	MTOR	019_MSC274_PRM_D22.raw	1530274	390866042880	3.91509e-06	WJ213-14	0.1	0.9788	0.976831
YHPQALIYPLTVASK	MTOR	020_MSC274_PRM_D22.raw	1948124	465672863744	4.18346e-06	WJ213-14	0.1	0.9838	1.04379
YHPQALIYPLTVASK	MTOR	021_MSC274_PRM_D22.raw	1669917	425007546368	3.92915e-06	WJ213-14	0.1	0.9819	0.980339
ETSFNQAYGR	MTOR	001_MSC274_PRM_D22.raw	1473556	337336074240	4.36821e-06	WJ213-14	0	0.9449	0.961895
ETSFNQAYGR	MTOR	002_MSC274_PRM_D22.raw	1507280	323030679552	4.66606e-06	WJ213-14	0	0.9466	1.02748
ETSFNQAYGR	MTOR	003_MSC274_PRM_D22.raw	1681028	366277132288	4.5895e-06	WJ213-14	0	0.9515	1.01062
ETSFNQAYGR	MTOR	004_MSC274_PRM_D22.raw	997810	202785210368	4.92053e-06	WJ213-14	10000	0.9499	1.08352
ETSFNQAYGR	MTOR	005_MSC274_PRM_D22.raw	1230854	227234480128	5.41667e-06	WJ213-14	10000	0.9485	1.19277
ETSFNQAYGR	MTOR	006_MSC274_PRM_D22.raw	1196912	219833450496	5.44463e-06	WJ213-14	10000	0.9499	1.19893
ETSFNQAYGR	MTOR	007_MSC274_PRM_D22.raw	1722204	341204598784	5.04742e-06	WJ213-14	1000	0.9509	1.11146
ETSFNQAYGR	MTOR	008_MSC274_PRM_D22.raw	1733291	364720914432	4.75238e-06	WJ213-14	1000	0.9427	1.04649
ETSFNQAYGR	MTOR	009_MSC274_PRM_D22.raw	1828545	377121931264	4.84868e-06	WJ213-14	1000	0.9464	1.0677
ETSFNQAYGR	MTOR	010_MSC274_PRM_D22.raw	2102820	357457821696	5.88271e-06	WJ213-14	100	0.952	1.29539
ETSFNQAYGR	MTOR	011_MSC274_PRM_D22.raw	1974600	420418945024	4.69674e-06	WJ213-14	100	0.9479	1.03424
ETSFNQAYGR	MTOR	012_MSC274_PRM_D22.raw	2059568	392504999936	5.24724e-06	WJ213-14	100	0.9557	1.15546
ETSFNQAYGR	MTOR	013_MSC274_PRM_D22.raw	2057631	442199343104	4.65318e-06	WJ213-14	10	0.9525	1.02464
ETSFNQAYGR	MTOR	014_MSC274_PRM_D22.raw	2131036	428330188800	4.97522e-06	WJ213-14	10	0.9444	1.09556
ETSFNQAYGR	MTOR	015_MSC274_PRM_D22.raw	2090749	400532373504	5.21993e-06	WJ213-14	10	0.939	1.14945
ETSFNQAYGR	MTOR	016_MSC274_PRM_D22.raw	1638349	398537490432	4.1109e-06	WJ213-14	1	0.9327	0.905235
ETSFNQAYGR	MTOR	017_MSC274_PRM_D22.raw	1983807	374449340416	5.29793e-06	WJ213-14	1	0.9454	1.16662
ETSFNQAYGR	MTOR	018_MSC274_PRM_D22.raw	2166381	453997297664	4.77179e-06	WJ213-14	1	0.94	1.05076
ETSFNQAYGR	MTOR	019_MSC274_PRM_D22.raw	2139794	390866042880	5.47449e-06	WJ213-14	0.1	0.9479	1.2055
ETSFNQAYGR	MTOR	020_MSC274_PRM_D22.raw	2351279	465672863744	5.04921e-06	WJ213-14	0.1	0.9486	1.11185
ETSFNQAYGR	MTOR	021_MSC274_PRM_D22.raw	2116672	425007546368	4.98032e-06	WJ213-14	0.1	0.9436	1.09668
DLELAVPGTYDPNQPIIR	MTOR	001_MSC274_PRM_D22.raw	1969006	337336074240	5.83693e-06	WJ213-14	0	0.9891	1.05674
DLELAVPGTYDPNQPIIR	MTOR	002_MSC274_PRM_D22.raw	1825490	323030679552	5.65114e-06	WJ213-14	0	0.9743	1.0231
DLELAVPGTYDPNQPIIR	MTOR	003_MSC274_PRM_D22.raw	1861627	366277132288	5.08256e-06	WJ213-14	0	0.9805	0.920164
DLELAVPGTYDPNQPIIR	MTOR	004_MSC274_PRM_D22.raw	677723	202785210368	3.34207e-06	WJ213-14	10000	0.9571	0.60506
DLELAVPGTYDPNQPIIR	MTOR	005_MSC274_PRM_D22.raw	1387412	227234480128	6.10564e-06	WJ213-14	10000	0.9813	1.10538
DLELAVPGTYDPNQPIIR	MTOR	006_MSC274_PRM_D22.raw	1299207	219833450496	5.90996e-06	WJ213-14	10000	0.9859	1.06996
DLELAVPGTYDPNQPIIR	MTOR	007_MSC274_PRM_D22.raw	2519453	341204598784	7.38399e-06	WJ213-14	1000	0.9895	1.33682
DLELAVPGTYDPNQPIIR	MTOR	008_MSC274_PRM_D22.raw	1999892	364720914432	5.48335e-06	WJ213-14	1000	0.9842	0.992723
DLELAVPGTYDPNQPIIR	MTOR	009_MSC274_PRM_D22.raw	2508060	377121931264	6.65053e-06	WJ213-14	1000	0.9835	1.20403
DLELAVPGTYDPNQPIIR	MTOR	010_MSC274_PRM_D22.raw	2755409	357457821696	7.70835e-06	WJ213-14	100	0.9919	1.39554
DLELAVPGTYDPNQPIIR	MTOR	011_MSC274_PRM_D22.raw	2375797	420418945024	5.65102e-06	WJ213-14	100	0.9896	1.02308
DLELAVPGTYDPNQPIIR	MTOR	012_MSC274_PRM_D22.raw	2486422	392504999936	6.33475e-06	WJ213-14	100	0.9832	1.14686
DLELAVPGTYDPNQPIIR	MTOR	013_MSC274_PRM_D22.raw	2134055	442199343104	4.826e-06	WJ213-14	10	0.9712	0.873715
DLELAVPGTYDPNQPIIR	MTOR	014_MSC274_PRM_D22.raw	2078101	428330188800	4.85163e-06	WJ213-14	10	0.9764	0.878355
DLELAVPGTYDPNQPIIR	MTOR	015_MSC274_PRM_D22.raw	2488212	400532373504	6.21226e-06	WJ213-14	10	0.9785	1.12469
DLELAVPGTYDPNQPIIR	MTOR	016_MSC274_PRM_D22.raw	1788266	398537490432	4.48707e-06	WJ213-14	1	0.9822	0.812354
DLELAVPGTYDPNQPIIR	MTOR	017_MSC274_PRM_D22.raw	2159078	374449340416	5.76601e-06	WJ213-14	1	0.9867	1.0439
DLELAVPGTYDPNQPIIR	MTOR	018_MSC274_PRM_D22.raw	2463445	453997297664	5.42612e-06	WJ213-14	1	0.9758	0.982363
DLELAVPGTYDPNQPIIR	MTOR	019_MSC274_PRM_D22.raw	2172870	390866042880	5.55912e-06	WJ213-14	0.1	0.9626	1.00644
DLELAVPGTYDPNQPIIR	MTOR	020_MSC274_PRM_D22.raw	2786904	465672863744	5.98468e-06	WJ213-14	0.1	0.9675	1.08349
DLELAVPGTYDPNQPIIR	MTOR	021_MSC274_PRM_D22.raw	2467874	425007546368	5.80666e-06	WJ213-14	0.1	0.9828	1.05126
LFDAPEAPLPSR	MTOR	001_MSC348_PRM_D23.raw	3027462	223617728512	1.35386e-05	WJ209-17	0	0.9744	0.833661
LFDAPEAPLPSR	MTOR	002_MSC348_PRM_D23.raw	4478660	243015024640	1.84296e-05	WJ209-17	0	0.9766	1.13483
LFDAPEAPLPSR	MTOR	003_MSC348_PRM_D23.raw	3373293	201372041216	1.67515e-05	WJ209-17	0	0.9648	1.03151
LFDAPEAPLPSR	MTOR	016_MSC348_PRM_D23.raw	3907458	259979657216	1.50299e-05	WJ209-17	1000	0.9797	0.92549
LFDAPEAPLPSR	MTOR	017_MSC348_PRM_D23.raw	4838786	262071910400	1.84636e-05	WJ209-17	1000	0.9804	1.13693
LFDAPEAPLPSR	MTOR	018_MSC348_PRM_D23.raw	4499437	261689311232	1.71938e-05	WJ209-17	1000	0.9766	1.05874
LFDAPEAPLPSR	MTOR	019_MSC348_PRM_D23.raw	4392489	290072887296	1.51427e-05	WJ209-17	100	0.9706	0.932439
LFDAPEAPLPSR	MTOR	020_MSC348_PRM_D23.raw	5280627	303300444160	1.74105e-05	WJ209-17	100	0.9823	1.07209
LFDAPEAPLPSR	MTOR	021_MSC348_PRM_D23.raw	5356991	300021415936	1.78554e-05	WJ209-17	100	0.9729	1.09948
LFDAPEAPLPSR	MTOR	022_MSC348_PRM_D23.raw	5359904	329996075008	1.62423e-05	WJ209-17	10	0.9724	1.00015
LFDAPEAPLPSR	MTOR	023_MSC348_PRM_D23.raw	5961029	303187132416	1.96612e-05	WJ209-17	10	0.9731	1.21067
LFDAPEAPLPSR	MTOR	024_MSC348_PRM_D23.raw	4454218	284640149504	1.56486e-05	WJ209-17	10	0.9769	0.96359
TLDQSPELR	MTOR	001_MSC348_PRM_D23.raw	2451981	223617728512	1.09651e-05	WJ209-17	0	0.9778	0.867762
TLDQSPELR	MTOR	002_MSC348_PRM_D23.raw	3370482	243015024640	1.38694e-05	WJ209-17	0	0.9746	1.09761
TLDQSPELR	MTOR	003_MSC348_PRM_D23.raw	2632649	201372041216	1.30736e-05	WJ209-17	0	0.9817	1.03463
TLDQSPELR	MTOR	016_MSC348_PRM_D23.raw	3321656	259979657216	1.27766e-05	WJ209-17	1000	0.9772	1.01113
TLDQSPELR	MTOR	017_MSC348_PRM_D23.raw	3386616	262071910400	1.29225e-05	WJ209-17	1000	0.9692	1.02267
TLDQSPELR	MTOR	018_MSC348_PRM_D23.raw	3775814	261689311232	1.44286e-05	WJ209-17	1000	0.9852	1.14186
TLDQSPELR	MTOR	019_MSC348_PRM_D23.raw	4087159	290072887296	1.40901e-05	WJ209-17	100	0.9829	1.11508
TLDQSPELR	MTOR	020_MSC348_PRM_D23.raw	3963037	303300444160	1.30664e-05	WJ209-17	100	0.9698	1.03406
TLDQSPELR	MTOR	021_MSC348_PRM_D23.raw	4977847	300021415936	1.65916e-05	WJ209-17	100	0.9721	1.31304
TLDQSPELR	MTOR	022_MSC348_PRM_D23.raw	4640173	329996075008	1.40613e-05	WJ209-17	10	0.9763	1.1128
TLDQSPELR	MTOR	023_MSC348_PRM_D23.raw	2453455	303187132416	8.09221e-06	WJ209-17	10	0.9717	0.640409
TLDQSPELR	MTOR	024_MSC348_PRM_D23.raw	4732452	284640149504	1.66261e-05	WJ209-17	10	0.9719	1.31577
YHPQALIYPLTVASK	MTOR	001_MSC348_PRM_D23.raw	612108	223617728512	2.7373e-06	WJ209-17	0	0.816	0.695234
YHPQALIYPLTVASK	MTOR	002_MSC348_PRM_D23.raw	1110413	243015024640	4.56932e-06	WJ209-17	0	0.9326	1.16054
YHPQALIYPLTVASK	MTOR	003_MSC348_PRM_D23.raw	907197	201372041216	4.50508e-06	WJ209-17	0	0.9401	1.14423
YHPQALIYPLTVASK	MTOR	016_MSC348_PRM_D23.raw	1146252	259979657216	4.40901e-06	WJ209-17	1000	0.952	1.11982
YHPQALIYPLTVASK	MTOR	017_MSC348_PRM_D23.raw	1102226	262071910400	4.20582e-06	WJ209-17	1000	0.9059	1.06822
YHPQALIYPLTVASK	MTOR	018_MSC348_PRM_D23.raw	1294376	261689311232	4.94623e-06	WJ209-17	1000	0.9453	1.25627
YHPQALIYPLTVASK	MTOR	019_MSC348_PRM_D23.raw	1078369	290072887296	3.71758e-06	WJ209-17	100	0.8862	0.944212
YHPQALIYPLTVASK	MTOR	020_MSC348_PRM_D23.raw	1552641	303300444160	5.11915e-06	WJ209-17	100	0.9381	1.30019
YHPQALIYPLTVASK	MTOR	021_MSC348_PRM_D23.raw	1314356	300021415936	4.38087e-06	WJ209-17	100	0.9451	1.11268
YHPQALIYPLTVASK	MTOR	022_MSC348_PRM_D23.raw	1356547	329996075008	4.1108e-06	WJ209-17	10	0.9402	1.04408
YHPQALIYPLTVASK	MTOR	023_MSC348_PRM_D23.raw	1914386	303187132416	6.31421e-06	WJ209-17	10	0.9493	1.60372
YHPQALIYPLTVASK	MTOR	024_MSC348_PRM_D23.raw	1521075	284640149504	5.34385e-06	WJ209-17	10	0.9609	1.35726
ETSFNQAYGR	MTOR	001_MSC348_PRM_D23.raw	984256	223617728512	4.40151e-06	WJ209-17	0	0.9322	0.859082
ETSFNQAYGR	MTOR	002_MSC348_PRM_D23.raw	1203835	243015024640	4.95375e-06	WJ209-17	0	0.9555	0.966866
ETSFNQAYGR	MTOR	003_MSC348_PRM_D23.raw	1211306	201372041216	6.01526e-06	WJ209-17	0	0.9467	1.17405
ETSFNQAYGR	MTOR	016_MSC348_PRM_D23.raw	1371744	259979657216	5.27635e-06	WJ209-17	1000	0.941	1.02983
ETSFNQAYGR	MTOR	017_MSC348_PRM_D23.raw	1600726	262071910400	6.10796e-06	WJ209-17	1000	0.9507	1.19215
ETSFNQAYGR	MTOR	018_MSC348_PRM_D23.raw	1383254	261689311232	5.28586e-06	WJ209-17	1000	0.9554	1.03169
ETSFNQAYGR	MTOR	019_MSC348_PRM_D23.raw	1561855	290072887296	5.38435e-06	WJ209-17	100	0.9425	1.05091
ETSFNQAYGR	MTOR	020_MSC348_PRM_D23.raw	1704490	303300444160	5.61981e-06	WJ209-17	100	0.9478	1.09687
ETSFNQAYGR	MTOR	021_MSC348_PRM_D23.raw	1667334	300021415936	5.55738e-06	WJ209-17	100	0.9486	1.08468
ETSFNQAYGR	MTOR	022_MSC348_PRM_D23.raw	1801521	329996075008	5.45922e-06	WJ209-17	10	0.9433	1.06552
ETSFNQAYGR	MTOR	023_MSC348_PRM_D23.raw	1423345	303187132416	4.69461e-06	WJ209-17	10	0.954	0.916288
ETSFNQAYGR	MTOR	024_MSC348_PRM_D23.raw	1813279	284640149504	6.37043e-06	WJ209-17	10	0.9499	1.24337
DLELAVPGTYDPNQPIIR	MTOR	001_MSC348_PRM_D23.raw	1407940	223617728512	6.29619e-06	WJ209-17	0	0.9404	0.997858
DLELAVPGTYDPNQPIIR	MTOR	002_MSC348_PRM_D23.raw	1498224	243015024640	6.16515e-06	WJ209-17	0	0.9538	0.97709
DLELAVPGTYDPNQPIIR	MTOR	003_MSC348_PRM_D23.raw	1302429	201372041216	6.46777e-06	WJ209-17	0	0.9545	1.02505
DLELAVPGTYDPNQPIIR	MTOR	016_MSC348_PRM_D23.raw	1592564	259979657216	6.12573e-06	WJ209-17	1000	0.9463	0.970842
DLELAVPGTYDPNQPIIR	MTOR	017_MSC348_PRM_D23.raw	1857834	262071910400	7.08902e-06	WJ209-17	1000	0.9711	1.12351
DLELAVPGTYDPNQPIIR	MTOR	018_MSC348_PRM_D23.raw	1899815	261689311232	7.25981e-06	WJ209-17	1000	0.9508	1.15058
DLELAVPGTYDPNQPIIR	MTOR	019_MSC348_PRM_D23.raw	1896178	290072887296	6.5369e-06	WJ209-17	100	0.9483	1.03601
DLELAVPGTYDPNQPIIR	MTOR	020_MSC348_PRM_D23.raw	1910357	303300444160	6.29856e-06	WJ209-17	100	0.9552	0.998234
DLELAVPGTYDPNQPIIR	MTOR	021_MSC348_PRM_D23.raw	1835065	300021415936	6.11645e-06	WJ209-17	100	0.9672	0.969371
DLELAVPGTYDPNQPIIR	MTOR	022_MSC348_PRM_D23.raw	2119954	329996075008	6.42418e-06	WJ209-17	10	0.9452	1.01814
DLELAVPGTYDPNQPIIR	MTOR	023_MSC348_PRM_D23.raw	2157568	303187132416	7.11629e-06	WJ209-17	10	0.9672	1.12783
DLELAVPGTYDPNQPIIR	MTOR	024_MSC348_PRM_D23.raw	2049757	284640149504	7.20122e-06	WJ209-17	10	0.9661	1.14129
LFDAPEAPLPSR	MTOR	001_MSC348_PRM_D23.raw	3027462	223617728512	1.35386e-05	WJ208-16	0	0.9744	0.833661
LFDAPEAPLPSR	MTOR	002_MSC348_PRM_D23.raw	4478660	243015024640	1.84296e-05	WJ208-16	0	0.9766	1.13483
LFDAPEAPLPSR	MTOR	003_MSC348_PRM_D23.raw	3373293	201372041216	1.67515e-05	WJ208-16	0	0.9648	1.03151
LFDAPEAPLPSR	MTOR	004_MSC348_PRM_D23.raw	3325139	240364617728	1.38337e-05	WJ208-16	10000	0.9751	0.851836
LFDAPEAPLPSR	MTOR	005_MSC348_PRM_D23.raw	4463594	283313635328	1.5755e-05	WJ208-16	10000	0.9776	0.970139
LFDAPEAPLPSR	MTOR	006_MSC348_PRM_D23.raw	4705191	277262991360	1.69701e-05	WJ208-16	10000	0.9809	1.04497
LFDAPEAPLPSR	MTOR	007_MSC348_PRM_D23.raw	4694064	271293153280	1.73026e-05	WJ208-16	1000	0.9728	1.06544
LFDAPEAPLPSR	MTOR	008_MSC348_PRM_D23.raw	4509957	268928679936	1.67701e-05	WJ208-16	1000	0.9774	1.03265
LFDAPEAPLPSR	MTOR	009_MSC348_PRM_D23.raw	4914192	258914435072	1.898e-05	WJ208-16	1000	0.9769	1.16873
LFDAPEAPLPSR	MTOR	010_MSC348_PRM_D23.raw	4631887	328512503808	1.40996e-05	WJ208-16	100	0.9715	0.868206
LFDAPEAPLPSR	MTOR	011_MSC348_PRM_D23.raw	4517835	304371662848	1.48432e-05	WJ208-16	100	0.9751	0.913993
LFDAPEAPLPSR	MTOR	012_MSC348_PRM_D23.raw	4623126	306149883904	1.51009e-05	WJ208-16	100	0.9805	0.929862
LFDAPEAPLPSR	MTOR	013_MSC348_PRM_D23.raw	4935903	234827530240	2.10193e-05	WJ208-16	10	0.9835	1.2943
LFDAPEAPLPSR	MTOR	014_MSC348_PRM_D23.raw	5078822	292100669440	1.73872e-05	WJ208-16	10	0.9741	1.07065
LFDAPEAPLPSR	MTOR	015_MSC348_PRM_D23.raw	5161894	295058604032	1.74945e-05	WJ208-16	10	0.9773	1.07725
TLDQSPELR	MTOR	001_MSC348_PRM_D23.raw	2451981	223617728512	1.09651e-05	WJ208-16	0	0.9778	0.867762
TLDQSPELR	MTOR	002_MSC348_PRM_D23.raw	3370482	243015024640	1.38694e-05	WJ208-16	0	0.9746	1.09761
TLDQSPELR	MTOR	003_MSC348_PRM_D23.raw	2632649	201372041216	1.30736e-05	WJ208-16	0	0.9817	1.03463
TLDQSPELR	MTOR	004_MSC348_PRM_D23.raw	2563820	240364617728	1.06664e-05	WJ208-16	10000	0.9591	0.844125
TLDQSPELR	MTOR	005_MSC348_PRM_D23.raw	3416434	283313635328	1.20588e-05	WJ208-16	10000	0.9852	0.954323
TLDQSPELR	MTOR	006_MSC348_PRM_D23.raw	3436800	277262991360	1.23955e-05	WJ208-16	10000	0.9736	0.980962
TLDQSPELR	MTOR	007_MSC348_PRM_D23.raw	3463880	271293153280	1.2768e-05	WJ208-16	1000	0.9821	1.01045
TLDQSPELR	MTOR	008_MSC348_PRM_D23.raw	3455382	268928679936	1.28487e-05	WJ208-16	1000	0.9765	1.01683
TLDQSPELR	MTOR	009_MSC348_PRM_D23.raw	2690371	258914435072	1.0391e-05	WJ208-16	1000	0.9854	0.822329
TLDQSPELR	MTOR	010_MSC348_PRM_D23.raw	3780256	328512503808	1.15072e-05	WJ208-16	100	0.9763	0.910666
TLDQSPELR	MTOR	011_MSC348_PRM_D23.raw	3801130	304371662848	1.24884e-05	WJ208-16	100	0.9723	0.988322
TLDQSPELR	MTOR	012_MSC348_PRM_D23.raw	3519944	306149883904	1.14975e-05	WJ208-16	100	0.9743	0.909895
TLDQSPELR	MTOR	013_MSC348_PRM_D23.raw	2399562	234827530240	1.02184e-05	WJ208-16	10	0.9742	0.808673
TLDQSPELR	MTOR	014_MSC348_PRM_D23.raw	4336296	292100669440	1.48452e-05	WJ208-16	10	0.9721	1.17483
TLDQSPELR	MTOR	015_MSC348_PRM_D23.raw	4140971	295058604032	1.40344e-05	WJ208-16	10	0.9807	1.11067
YHPQALIYPLTVASK	MTOR	001_MSC348_PRM_D23.raw	612108	223617728512	2.7373e-06	WJ208-16	0	0.816	0.695234
YHPQALIYPLTVASK	MTOR	002_MSC348_PRM_D23.raw	1110413	243015024640	4.56932e-06	WJ208-16	0	0.9326	1.16054
YHPQALIYPLTVASK	MTOR	003_MSC348_PRM_D23.raw	907197	201372041216	4.50508e-06	WJ208-16	0	0.9401	1.14423
YHPQALIYPLTVASK	MTOR	004_MSC348_PRM_D23.raw	1115067	240364617728	4.63906e-06	WJ208-16	10000	0.9214	1.17826
YHPQALIYPLTVASK	MTOR	005_MSC348_PRM_D23.raw	980588	283313635328	3.46114e-06	WJ208-16	10000	0.8087	0.87908
YHPQALIYPLTVASK	MTOR	006_MSC348_PRM_D23.raw	1383278	277262991360	4.98905e-06	WJ208-16	10000	0.9524	1.26715
YHPQALIYPLTVASK	MTOR	007_MSC348_PRM_D23.raw	1050124	271293153280	3.87081e-06	WJ208-16	1000	0.9128	0.98313
YHPQALIYPLTVASK	MTOR	008_MSC348_PRM_D23.raw	1178775	268928679936	4.38323e-06	WJ208-16	1000	0.9329	1.11328
YHPQALIYPLTVASK	MTOR	009_MSC348_PRM_D23.raw	1501262	258914435072	5.79829e-06	WJ208-16	1000	0.9495	1.47268
YHPQALIYPLTVASK	MTOR	010_MSC348_PRM_D23.raw	1160184	328512503808	3.53163e-06	WJ208-16	100	0.8852	0.896983
YHPQALIYPLTVASK	MTOR	011_MSC348_PRM_D23.raw	1581921	304371662848	5.19733e-06	WJ208-16	100	0.9068	1.32005
YHPQALIYPLTVASK	MTOR	012_MSC348_PRM_D23.raw	1474328	306149883904	4.81571e-06	WJ208-16	100	0.9515	1.22312
YHPQALIYPLTVASK	MTOR	013_MSC348_PRM_D23.raw	1286855	234827530240	5.48e-06	WJ208-16	10	0.9424	1.39184
YHPQALIYPLTVASK	MTOR	014_MSC348_PRM_D23.raw	1372023	292100669440	4.69709e-06	WJ208-16	10	0.8632	1.19299
YHPQALIYPLTVASK	MTOR	015_MSC348_PRM_D23.raw	1499181	295058604032	5.08096e-06	WJ208-16	10	0.9724	1.29049
ETSFNQAYGR	MTOR	001_MSC348_PRM_D23.raw	984256	223617728512	4.40151e-06	WJ208-16	0	0.9322	0.859082
ETSFNQAYGR	MTOR	002_MSC348_PRM_D23.raw	1203835	243015024640	4.95375e-06	WJ208-16	0	0.9555	0.966866
ETSFNQAYGR	MTOR	003_MSC348_PRM_D23.raw	1211306	201372041216	6.01526e-06	WJ208-16	0	0.9467	1.17405
ETSFNQAYGR	MTOR	004_MSC348_PRM_D23.raw	1137025	240364617728	4.73042e-06	WJ208-16	10000	0.9548	0.923277
ETSFNQAYGR	MTOR	005_MSC348_PRM_D23.raw	1437961	283313635328	5.07551e-06	WJ208-16	10000	0.9454	0.990632
ETSFNQAYGR	MTOR	006_MSC348_PRM_D23.raw	1499711	277262991360	5.40898e-06	WJ208-16	10000	0.9488	1.05572
ETSFNQAYGR	MTOR	007_MSC348_PRM_D23.raw	1452118	271293153280	5.35258e-06	WJ208-16	1000	0.9374	1.04471
ETSFNQAYGR	MTOR	008_MSC348_PRM_D23.raw	1368607	268928679936	5.08911e-06	WJ208-16	1000	0.958	0.993286
ETSFNQAYGR	MTOR	009_MSC348_PRM_D23.raw	1201921	258914435072	4.64216e-06	WJ208-16	1000	0.9391	0.90605
ETSFNQAYGR	MTOR	010_MSC348_PRM_D23.raw	1423500	328512503808	4.33317e-06	WJ208-16	100	0.9466	0.845743
ETSFNQAYGR	MTOR	011_MSC348_PRM_D23.raw	1482604	304371662848	4.87103e-06	WJ208-16	100	0.9464	0.950722
ETSFNQAYGR	MTOR	012_MSC348_PRM_D23.raw	1555107	306149883904	5.07956e-06	WJ208-16	100	0.9397	0.991423
ETSFNQAYGR	MTOR	013_MSC348_PRM_D23.raw	735613	234827530240	3.13257e-06	WJ208-16	10	0.9442	0.611411
ETSFNQAYGR	MTOR	014_MSC348_PRM_D23.raw	1577506	292100669440	5.40056e-06	WJ208-16	10	0.95	1.05407
ETSFNQAYGR	MTOR	015_MSC348_PRM_D23.raw	1698778	295058604032	5.75743e-06	WJ208-16	10	0.9551	1.12373
DLELAVPGTYDPNQPIIR	MTOR	001_MSC348_PRM_D23.raw	1407940	223617728512	6.29619e-06	WJ208-16	0	0.9404	0.997858
DLELAVPGTYDPNQPIIR	MTOR	002_MSC348_PRM_D23.raw	1498224	243015024640	6.16515e-06	WJ208-16	0	0.9538	0.97709
DLELAVPGTYDPNQPIIR	MTOR	003_MSC348_PRM_D23.raw	1302429	201372041216	6.46777e-06	WJ208-16	0	0.9545	1.02505
DLELAVPGTYDPNQPIIR	MTOR	004_MSC348_PRM_D23.raw	1197128	240364617728	4.98047e-06	WJ208-16	10000	0.9581	0.789334
DLELAVPGTYDPNQPIIR	MTOR	005_MSC348_PRM_D23.raw	1692197	283313635328	5.97288e-06	WJ208-16	10000	0.9501	0.946617
DLELAVPGTYDPNQPIIR	MTOR	006_MSC348_PRM_D23.raw	1938352	277262991360	6.99102e-06	WJ208-16	10000	0.9415	1.10798
DLELAVPGTYDPNQPIIR	MTOR	007_MSC348_PRM_D23.raw	1410492	271293153280	5.19914e-06	WJ208-16	1000	0.9649	0.823991
DLELAVPGTYDPNQPIIR	MTOR	008_MSC348_PRM_D23.raw	1854526	268928679936	6.89598e-06	WJ208-16	1000	0.9598	1.09292
DLELAVPGTYDPNQPIIR	MTOR	009_MSC348_PRM_D23.raw	2043117	258914435072	7.89109e-06	WJ208-16	1000	0.9598	1.25063
DLELAVPGTYDPNQPIIR	MTOR	010_MSC348_PRM_D23.raw	1863481	328512503808	5.67248e-06	WJ208-16	100	0.9643	0.899009
DLELAVPGTYDPNQPIIR	MTOR	011_MSC348_PRM_D23.raw	1723004	304371662848	5.66086e-06	WJ208-16	100	0.9523	0.897166
DLELAVPGTYDPNQPIIR	MTOR	012_MSC348_PRM_D23.raw	1746737	306149883904	5.7055e-06	WJ208-16	100	0.9594	0.904241
DLELAVPGTYDPNQPIIR	MTOR	013_MSC348_PRM_D23.raw	1842192	234827530240	7.84487e-06	WJ208-16	10	0.9659	1.2433
DLELAVPGTYDPNQPIIR	MTOR	014_MSC348_PRM_D23.raw	1827124	292100669440	6.25512e-06	WJ208-16	10	0.9535	0.991349
DLELAVPGTYDPNQPIIR	MTOR	015_MSC348_PRM_D23.raw	2049119	295058604032	6.94479e-06	WJ208-16	10	0.963	1.10065
LFDAPEAPLPSR	MTOR	001_MSC289_PRM_D22.raw	4746715	368048177152	1.2897e-05	WJ204-12	0	0.9791	1.17354
LFDAPEAPLPSR	MTOR	002_MSC289_PRM_D22.raw	3398120	349124198400	9.73327e-06	WJ204-12	0	0.9789	0.885663
LFDAPEAPLPSR	MTOR	003_MSC289_PRM_D22.raw	3281313	317367123968	1.03392e-05	WJ204-12	0	0.9842	0.940796
LFDAPEAPLPSR	MTOR	004_MSC289_PRM_D22.raw	3699235	385995243520	9.58363e-06	WJ204-12	100	0.9805	0.872047
LFDAPEAPLPSR	MTOR	005_MSC289_PRM_D22.raw	3380358	368185769984	9.18112e-06	WJ204-12	100	0.9789	0.835421
LFDAPEAPLPSR	MTOR	006_MSC289_PRM_D22.raw	3834692	400164388864	9.58279e-06	WJ204-12	100	0.982	0.871971
LFDAPEAPLPSR	MTOR	007_MSC289_PRM_D22.raw	3846683	397327663104	9.68139e-06	WJ204-12	10	0.9804	0.880942
LFDAPEAPLPSR	MTOR	008_MSC289_PRM_D22.raw	3799053	445503668224	8.52755e-06	WJ204-12	10	0.9741	0.77595
LFDAPEAPLPSR	MTOR	009_MSC289_PRM_D22.raw	4338816	436157349888	9.94782e-06	WJ204-12	10	0.9761	0.905186
LFDAPEAPLPSR	MTOR	010_MSC289_PRM_D22.raw	4141334	428040912896	9.67509e-06	WJ204-12	1	0.9793	0.880369
LFDAPEAPLPSR	MTOR	011_MSC289_PRM_D22.raw	3987964	425787359232	9.36609e-06	WJ204-12	1	0.9829	0.852252
LFDAPEAPLPSR	MTOR	012_MSC289_PRM_D22.raw	3908527	413678501888	9.44822e-06	WJ204-12	1	0.9851	0.859726
TLDQSPELR	MTOR	001_MSC289_PRM_D22.raw	3530088	368048177152	9.59137e-06	WJ204-12	0	0.9852	1.11399
TLDQSPELR	MTOR	002_MSC289_PRM_D22.raw	2663773	349124198400	7.62987e-06	WJ204-12	0	0.9785	0.886168
TLDQSPELR	MTOR	003_MSC289_PRM_D22.raw	2732097	317367123968	8.60863e-06	WJ204-12	0	0.9799	0.999846
TLDQSPELR	MTOR	004_MSC289_PRM_D22.raw	2904682	385995243520	7.52518e-06	WJ204-12	100	0.9771	0.874008
TLDQSPELR	MTOR	005_MSC289_PRM_D22.raw	2480723	368185769984	6.73769e-06	WJ204-12	100	0.9824	0.782546
TLDQSPELR	MTOR	006_MSC289_PRM_D22.raw	3182065	400164388864	7.95189e-06	WJ204-12	100	0.9774	0.923569
TLDQSPELR	MTOR	007_MSC289_PRM_D22.raw	2860938	397327663104	7.20045e-06	WJ204-12	10	0.9734	0.836293
TLDQSPELR	MTOR	008_MSC289_PRM_D22.raw	2855662	445503668224	6.40996e-06	WJ204-12	10	0.9741	0.744482
TLDQSPELR	MTOR	009_MSC289_PRM_D22.raw	3421350	436157349888	7.8443e-06	WJ204-12	10	0.9755	0.911073
TLDQSPELR	MTOR	010_MSC289_PRM_D22.raw	3208735	428040912896	7.49633e-06	WJ204-12	1	0.9755	0.870658
TLDQSPELR	MTOR	011_MSC289_PRM_D22.raw	3117650	425787359232	7.32208e-06	WJ204-12	1	0.9837	0.85042
TLDQSPELR	MTOR	012_MSC289_PRM_D22.raw	2562088	413678501888	6.19343e-06	WJ204-12	1	0.9759	0.719333
YHPQALIYPLTVASK	MTOR	001_MSC289_PRM_D22.raw	1630903	368048177152	4.43122e-06	WJ204-12	0	0.9418	1.13738
YHPQALIYPLTVASK	MTOR	002_MSC289_PRM_D22.raw	1295409	349124198400	3.71045e-06	WJ204-12	0	0.9276	0.952378
YHPQALIYPLTVASK	MTOR	003_MSC289_PRM_D22.raw	1125474	317367123968	3.54628e-06	WJ204-12	0	0.9391	0.91024
YHPQALIYPLTVASK	MTOR	004_MSC289_PRM_D22.raw	1507679	385995243520	3.90595e-06	WJ204-12	100	0.9391	1.00256
YHPQALIYPLTVASK	MTOR	005_MSC289_PRM_D22.raw	1323822	368185769984	3.59553e-06	WJ204-12	100	0.9435	0.92288
YHPQALIYPLTVASK	MTOR	006_MSC289_PRM_D22.raw	1204020	400164388864	3.00881e-06	WJ204-12	100	0.9733	0.772285
YHPQALIYPLTVASK	MTOR	007_MSC289_PRM_D22.raw	1521665	397327663104	3.82975e-06	WJ204-12	10	0.9741	0.982998
YHPQALIYPLTVASK	MTOR	008_MSC289_PRM_D22.raw	1849402	445503668224	4.15126e-06	WJ204-12	10	0.9472	1.06552
YHPQALIYPLTVASK	MTOR	009_MSC289_PRM_D22.raw	1618303	436157349888	3.71037e-06	WJ204-12	10	0.9287	0.952356
YHPQALIYPLTVASK	MTOR	010_MSC289_PRM_D22.raw	1483343	428040912896	3.46542e-06	WJ204-12	1	0.9703	0.889486
YHPQALIYPLTVASK	MTOR	011_MSC289_PRM_D22.raw	1223833	425787359232	2.87428e-06	WJ204-12	1	0.9282	0.737755
YHPQALIYPLTVASK	MTOR	012_MSC289_PRM_D22.raw	1338651	413678501888	3.23597e-06	WJ204-12	1	0.9592	0.830591
ETSFNQAYGR	MTOR	001_MSC289_PRM_D22.raw	1727829	368048177152	4.69457e-06	WJ204-12	0	0.9461	1.00261
ETSFNQAYGR	MTOR	002_MSC289_PRM_D22.raw	1513767	349124198400	4.3359e-06	WJ204-12	0	0.944	0.926005
ETSFNQAYGR	MTOR	003_MSC289_PRM_D22.raw	1592117	317367123968	5.01664e-06	WJ204-12	0	0.9523	1.07139
ETSFNQAYGR	MTOR	004_MSC289_PRM_D22.raw	1708573	385995243520	4.42641e-06	WJ204-12	100	0.9417	0.945335
ETSFNQAYGR	MTOR	005_MSC289_PRM_D22.raw	1483832	368185769984	4.03012e-06	WJ204-12	100	0.9491	0.8607
ETSFNQAYGR	MTOR	006_MSC289_PRM_D22.raw	1532968	400164388864	3.83085e-06	WJ204-12	100	0.9391	0.818142
ETSFNQAYGR	MTOR	007_MSC289_PRM_D22.raw	1754795	397327663104	4.41649e-06	WJ204-12	10	0.9519	0.943217
ETSFNQAYGR	MTOR	008_MSC289_PRM_D22.raw	1821034	445503668224	4.08758e-06	WJ204-12	10	0.952	0.872973
ETSFNQAYGR	MTOR	009_MSC289_PRM_D22.raw	2007187	436157349888	4.60198e-06	WJ204-12	10	0.9418	0.982831
ETSFNQAYGR	MTOR	010_MSC289_PRM_D22.raw	1894470	428040912896	4.42591e-06	WJ204-12	1	0.9433	0.945228
ETSFNQAYGR	MTOR	011_MSC289_PRM_D22.raw	1708779	425787359232	4.01322e-06	WJ204-12	1	0.9484	0.857092
ETSFNQAYGR	MTOR	012_MSC289_PRM_D22.raw	1741988	413678501888	4.21097e-06	WJ204-12	1	0.9453	0.899324
DLELAVPGTYDPNQPIIR	MTOR	001_MSC289_PRM_D22.raw	2386834	368048177152	6.48511e-06	WJ204-12	0	0.9689	1.13238
DLELAVPGTYDPNQPIIR	MTOR	002_MSC289_PRM_D22.raw	1820604	349124198400	5.21477e-06	WJ204-12	0	0.9814	0.910561
DLELAVPGTYDPNQPIIR	MTOR	003_MSC289_PRM_D22.raw	1739519	317367123968	5.48109e-06	WJ204-12	0	0.9767	0.957063
DLELAVPGTYDPNQPIIR	MTOR	004_MSC289_PRM_D22.raw	2214975	385995243520	5.73835e-06	WJ204-12	100	0.9806	1.00198
DLELAVPGTYDPNQPIIR	MTOR	005_MSC289_PRM_D22.raw	1845970	368185769984	5.01369e-06	WJ204-12	100	0.9679	0.875449
DLELAVPGTYDPNQPIIR	MTOR	006_MSC289_PRM_D22.raw	2003356	400164388864	5.00633e-06	WJ204-12	100	0.967	0.874164
DLELAVPGTYDPNQPIIR	MTOR	007_MSC289_PRM_D22.raw	2212193	397327663104	5.56768e-06	WJ204-12	10	0.9693	0.972182
DLELAVPGTYDPNQPIIR	MTOR	008_MSC289_PRM_D22.raw	2135392	445503668224	4.79321e-06	WJ204-12	10	0.9776	0.83695
DLELAVPGTYDPNQPIIR	MTOR	009_MSC289_PRM_D22.raw	2438257	436157349888	5.59032e-06	WJ204-12	10	0.9672	0.976134
DLELAVPGTYDPNQPIIR	MTOR	010_MSC289_PRM_D22.raw	2335032	428040912896	5.45516e-06	WJ204-12	1	0.976	0.952535
DLELAVPGTYDPNQPIIR	MTOR	011_MSC289_PRM_D22.raw	2100964	425787359232	4.9343e-06	WJ204-12	1	0.9692	0.861587
DLELAVPGTYDPNQPIIR	MTOR	012_MSC289_PRM_D22.raw	1892528	413678501888	4.57488e-06	WJ204-12	1	0.9605	0.798827
LFDAPEAPLPSR	MTOR	001_MSC349_PRM_r_D23.raw	3048187	234732617728	1.29858e-05	WJ203-14	0	0.9601	1.02542
LFDAPEAPLPSR	MTOR	002_MSC349_PRM_r_D23.raw	3155411	228691574784	1.37977e-05	WJ203-14	0	0.9665	1.08953
LFDAPEAPLPSR	MTOR	003_MSC349_PRM_r_D23.raw	3384830	301996474368	1.12082e-05	WJ203-14	0	0.972	0.885051
LFDAPEAPLPSR	MTOR	004_MSC349_PRM_r_D23.raw	3835370	245516173312	1.56217e-05	WJ203-14	10000	0.9621	1.23356
LFDAPEAPLPSR	MTOR	005_MSC349_PRM_r_D23.raw	3678115	254776279040	1.44366e-05	WJ203-14	10000	0.9719	1.13999
LFDAPEAPLPSR	MTOR	006_MSC349_PRM_r_D23.raw	3400401	222754668544	1.52652e-05	WJ203-14	10000	0.9733	1.20542
LFDAPEAPLPSR	MTOR	007_MSC349_PRM_r_D23.raw	3793388	328033730560	1.1564e-05	WJ203-14	1000	0.9703	0.91315
LFDAPEAPLPSR	MTOR	008_MSC349_PRM_r_D23.raw	3877967	289286029312	1.34053e-05	WJ203-14	1000	0.9635	1.05855
LFDAPEAPLPSR	MTOR	009_MSC349_PRM_r_D23.raw	4080357	285042769920	1.43149e-05	WJ203-14	1000	0.9715	1.13037
LFDAPEAPLPSR	MTOR	010_MSC349_PRM_r_D23.raw	4156976	315635695616	1.31702e-05	WJ203-14	100	0.9761	1.03998
LFDAPEAPLPSR	MTOR	011_MSC349_PRM_r_D23.raw	3648515	304782802944	1.19709e-05	WJ203-14	100	0.9789	0.945277
LFDAPEAPLPSR	MTOR	012_MSC349_PRM_r_D23.raw	3395385	270687289344	1.25436e-05	WJ203-14	100	0.9769	0.9905
LFDAPEAPLPSR	MTOR	013_MSC349_PRM_r_D23.raw	3362144	312186601472	1.07697e-05	WJ203-14	10	0.966	0.850424
LFDAPEAPLPSR	MTOR	014_MSC349_PRM_r_D23.raw	3875124	328095006720	1.1811e-05	WJ203-14	10	0.9726	0.932651
LFDAPEAPLPSR	MTOR	015_MSC349_PRM_r_D23.raw	3511904	250457899008	1.40219e-05	WJ203-14	10	0.9734	1.10724
TLDQSPELR	MTOR	001_MSC349_PRM_r_D23.raw	3318768	234732617728	1.41385e-05	WJ203-14	0	0.9646	1.07494
TLDQSPELR	MTOR	002_MSC349_PRM_r_D23.raw	2985077	228691574784	1.30529e-05	WJ203-14	0	0.9722	0.992403
TLDQSPELR	MTOR	003_MSC349_PRM_r_D23.raw	3704578	301996474368	1.2267e-05	WJ203-14	0	0.9717	0.932652
TLDQSPELR	MTOR	004_MSC349_PRM_r_D23.raw	3680922	245516173312	1.49926e-05	WJ203-14	10000	0.9708	1.13988
TLDQSPELR	MTOR	005_MSC349_PRM_r_D23.raw	4461614	254776279040	1.75119e-05	WJ203-14	10000	0.9835	1.33142
TLDQSPELR	MTOR	006_MSC349_PRM_r_D23.raw	3240461	222754668544	1.45472e-05	WJ203-14	10000	0.9815	1.10602
TLDQSPELR	MTOR	007_MSC349_PRM_r_D23.raw	4494106	328033730560	1.37001e-05	WJ203-14	1000	0.9754	1.04162
TLDQSPELR	MTOR	008_MSC349_PRM_r_D23.raw	4301708	289286029312	1.48701e-05	WJ203-14	1000	0.9677	1.13057
TLDQSPELR	MTOR	009_MSC349_PRM_r_D23.raw	3944711	285042769920	1.3839e-05	WJ203-14	1000	0.98	1.05217
TLDQSPELR	MTOR	010_MSC349_PRM_r_D23.raw	4009894	315635695616	1.27042e-05	WJ203-14	100	0.9787	0.965894
TLDQSPELR	MTOR	011_MSC349_PRM_r_D23.raw	3491122	304782802944	1.14545e-05	WJ203-14	100	0.9834	0.870878
TLDQSPELR	MTOR	012_MSC349_PRM_r_D23.raw	3463797	270687289344	1.27963e-05	WJ203-14	100	0.9779	0.972898
TLDQSPELR	MTOR	013_MSC349_PRM_r_D23.raw	4046007	312186601472	1.29602e-05	WJ203-14	10	0.9721	0.98536
TLDQSPELR	MTOR	014_MSC349_PRM_r_D23.raw	3850352	328095006720	1.17355e-05	WJ203-14	10	0.9731	0.892244
TLDQSPELR	MTOR	015_MSC349_PRM_r_D23.raw	3594342	250457899008	1.43511e-05	WJ203-14	10	0.9802	1.09111
YHPQALIYPLTVASK	MTOR	001_MSC349_PRM_r_D23.raw	708584	234732617728	3.01869e-06	WJ203-14	0	0.941	1.00714
YHPQALIYPLTVASK	MTOR	002_MSC349_PRM_r_D23.raw	875900	228691574784	3.83005e-06	WJ203-14	0	0.9386	1.27784
YHPQALIYPLTVASK	MTOR	003_MSC349_PRM_r_D23.raw	647221	301996474368	2.14314e-06	WJ203-14	0	0.9181	0.715026
YHPQALIYPLTVASK	MTOR	004_MSC349_PRM_r_D23.raw	816424	245516173312	3.32534e-06	WJ203-14	10000	0.9379	1.10945
YHPQALIYPLTVASK	MTOR	005_MSC349_PRM_r_D23.raw	868793	254776279040	3.41002e-06	WJ203-14	10000	0.9603	1.1377
YHPQALIYPLTVASK	MTOR	006_MSC349_PRM_r_D23.raw	826690	222754668544	3.71121e-06	WJ203-14	10000	0.9729	1.23819
YHPQALIYPLTVASK	MTOR	007_MSC349_PRM_r_D23.raw	827137	328033730560	2.5215e-06	WJ203-14	1000	0.9741	0.841259
YHPQALIYPLTVASK	MTOR	008_MSC349_PRM_r_D23.raw	995460	289286029312	3.44109e-06	WJ203-14	1000	0.9685	1.14807
YHPQALIYPLTVASK	MTOR	009_MSC349_PRM_r_D23.raw	815613	285042769920	2.86137e-06	WJ203-14	1000	0.9508	0.954652
YHPQALIYPLTVASK	MTOR	010_MSC349_PRM_r_D23.raw	884666	315635695616	2.80281e-06	WJ203-14	100	0.9102	0.935113
YHPQALIYPLTVASK	MTOR	011_MSC349_PRM_r_D23.raw	1160637	304782802944	3.80808e-06	WJ203-14	100	0.9717	1.27051
YHPQALIYPLTVASK	MTOR	012_MSC349_PRM_r_D23.raw	934019	270687289344	3.45055e-06	WJ203-14	100	0.9474	1.15122
YHPQALIYPLTVASK	MTOR	013_MSC349_PRM_r_D23.raw	638609	312186601472	2.0456e-06	WJ203-14	10	0.9395	0.682483
YHPQALIYPLTVASK	MTOR	014_MSC349_PRM_r_D23.raw	852218	328095006720	2.59747e-06	WJ203-14	10	0.9585	0.866607
YHPQALIYPLTVASK	MTOR	015_MSC349_PRM_r_D23.raw	969689	250457899008	3.87166e-06	WJ203-14	10	0.9708	1.29172
ETSFNQAYGR	MTOR	001_MSC349_PRM_r_D23.raw	1194094	234732617728	5.08704e-06	WJ203-14	0	0.9354	1.0227
ETSFNQAYGR	MTOR	002_MSC349_PRM_r_D23.raw	1279069	228691574784	5.59299e-06	WJ203-14	0	0.9406	1.12441
ETSFNQAYGR	MTOR	003_MSC349_PRM_r_D23.raw	1281193	301996474368	4.24241e-06	WJ203-14	0	0.9415	0.852892
ETSFNQAYGR	MTOR	004_MSC349_PRM_r_D23.raw	1271669	245516173312	5.17957e-06	WJ203-14	10000	0.9443	1.0413
ETSFNQAYGR	MTOR	005_MSC349_PRM_r_D23.raw	1398661	254776279040	5.48976e-06	WJ203-14	10000	0.9414	1.10366
ETSFNQAYGR	MTOR	006_MSC349_PRM_r_D23.raw	1387204	222754668544	6.2275e-06	WJ203-14	10000	0.9446	1.25197
ETSFNQAYGR	MTOR	007_MSC349_PRM_r_D23.raw	1605087	328033730560	4.89305e-06	WJ203-14	1000	0.9451	0.983698
ETSFNQAYGR	MTOR	008_MSC349_PRM_r_D23.raw	1722447	289286029312	5.95413e-06	WJ203-14	1000	0.9437	1.19702
ETSFNQAYGR	MTOR	009_MSC349_PRM_r_D23.raw	1462515	285042769920	5.13086e-06	WJ203-14	1000	0.9345	1.03151
ETSFNQAYGR	MTOR	010_MSC349_PRM_r_D23.raw	1620908	315635695616	5.13538e-06	WJ203-14	100	0.9384	1.03241
ETSFNQAYGR	MTOR	011_MSC349_PRM_r_D23.raw	1609614	304782802944	5.28118e-06	WJ203-14	100	0.9449	1.06173
ETSFNQAYGR	MTOR	012_MSC349_PRM_r_D23.raw	1450632	270687289344	5.35907e-06	WJ203-14	100	0.932	1.07738
ETSFNQAYGR	MTOR	013_MSC349_PRM_r_D23.raw	1328176	312186601472	4.25443e-06	WJ203-14	10	0.9472	0.855309
ETSFNQAYGR	MTOR	014_MSC349_PRM_r_D23.raw	1487035	328095006720	4.53233e-06	WJ203-14	10	0.9385	0.911178
ETSFNQAYGR	MTOR	015_MSC349_PRM_r_D23.raw	1442479	250457899008	5.75937e-06	WJ203-14	10	0.9366	1.15786
DLELAVPGTYDPNQPIIR	MTOR	001_MSC349_PRM_r_D23.raw	1153490	234732617728	4.91406e-06	WJ203-14	0	0.9285	0.992313
DLELAVPGTYDPNQPIIR	MTOR	002_MSC349_PRM_r_D23.raw	1129640	228691574784	4.93958e-06	WJ203-14	0	0.929	0.997466
DLELAVPGTYDPNQPIIR	MTOR	003_MSC349_PRM_r_D23.raw	1510811	301996474368	5.00274e-06	WJ203-14	0	0.9472	1.01022
DLELAVPGTYDPNQPIIR	MTOR	004_MSC349_PRM_r_D23.raw	927761	245516173312	3.77882e-06	WJ203-14	10000	0.9143	0.76307
DLELAVPGTYDPNQPIIR	MTOR	005_MSC349_PRM_r_D23.raw	1401588	254776279040	5.50125e-06	WJ203-14	10000	0.931	1.11089
DLELAVPGTYDPNQPIIR	MTOR	006_MSC349_PRM_r_D23.raw	1113280	222754668544	4.99779e-06	WJ203-14	10000	0.9343	1.00922
DLELAVPGTYDPNQPIIR	MTOR	007_MSC349_PRM_r_D23.raw	1762533	328033730560	5.37302e-06	WJ203-14	1000	0.9474	1.08499
DLELAVPGTYDPNQPIIR	MTOR	008_MSC349_PRM_r_D23.raw	1594826	289286029312	5.51297e-06	WJ203-14	1000	0.9458	1.11325
DLELAVPGTYDPNQPIIR	MTOR	009_MSC349_PRM_r_D23.raw	1381828	285042769920	4.84779e-06	WJ203-14	1000	0.9391	0.978931
DLELAVPGTYDPNQPIIR	MTOR	010_MSC349_PRM_r_D23.raw	1279673	315635695616	4.05427e-06	WJ203-14	100	0.9255	0.818693
DLELAVPGTYDPNQPIIR	MTOR	011_MSC349_PRM_r_D23.raw	1189374	304782802944	3.90237e-06	WJ203-14	100	0.9517	0.788018
DLELAVPGTYDPNQPIIR	MTOR	012_MSC349_PRM_r_D23.raw	1003109	270687289344	3.70579e-06	WJ203-14	100	0.9432	0.748322
DLELAVPGTYDPNQPIIR	MTOR	013_MSC349_PRM_r_D23.raw	1506527	312186601472	4.82573e-06	WJ203-14	10	0.9448	0.974475
DLELAVPGTYDPNQPIIR	MTOR	014_MSC349_PRM_r_D23.raw	1471166	328095006720	4.48396e-06	WJ203-14	10	0.9303	0.905462
DLELAVPGTYDPNQPIIR	MTOR	015_MSC349_PRM_r_D23.raw	950452	250457899008	3.79486e-06	WJ203-14	10	0.8861	0.766309
LFDAPEAPLPSR	MTOR	001_MSC292_PRM_D22.raw	5216355	319390449664	1.63322e-05	WJ202-15	0	0.9835	1.06728
LFDAPEAPLPSR	MTOR	002_MSC292_PRM_D22.raw	5541101	351230066688	1.57763e-05	WJ202-15	0	0.9867	1.03095
LFDAPEAPLPSR	MTOR	003_MSC292_PRM_D22.raw	5179915	375365763072	1.37996e-05	WJ202-15	0	0.9831	0.901778
LFDAPEAPLPSR	MTOR	013_MSC292_PRM_D22.raw	5182630	341467299840	1.51775e-05	WJ202-15	1000	0.9742	0.99182
LFDAPEAPLPSR	MTOR	014_MSC292_PRM_D22.raw	5407373	374906847232	1.44232e-05	WJ202-15	1000	0.9783	0.942529
LFDAPEAPLPSR	MTOR	015_MSC292_PRM_D22.raw	5314674	411407319040	1.29183e-05	WJ202-15	1000	0.9784	0.844182
LFDAPEAPLPSR	MTOR	016_MSC292_PRM_D22.raw	5104158	417004093440	1.22401e-05	WJ202-15	100	0.9774	0.799863
LFDAPEAPLPSR	MTOR	017_MSC292_PRM_D22.raw	5302015	393033089024	1.349e-05	WJ202-15	100	0.9814	0.881543
LFDAPEAPLPSR	MTOR	018_MSC292_PRM_D22.raw	5432622	426928177152	1.27249e-05	WJ202-15	100	0.9771	0.831546
LFDAPEAPLPSR	MTOR	019_MSC292_PRM_D22.raw	5110500	430841298944	1.18617e-05	WJ202-15	10	0.9763	0.775136
LFDAPEAPLPSR	MTOR	020_MSC292_PRM_D22.raw	5450012	433670029312	1.25672e-05	WJ202-15	10	0.9812	0.821239
LFDAPEAPLPSR	MTOR	021_MSC292_PRM_D22.raw	4915896	376932859904	1.30418e-05	WJ202-15	10	0.9762	0.852256
LFDAPEAPLPSR	MTOR	022_MSC292_PRM_D22.raw	4800477	414246764544	1.15884e-05	WJ202-15	1	0.9832	0.757281
LFDAPEAPLPSR	MTOR	023_MSC292_PRM_D22.raw	4800713	368739975168	1.30192e-05	WJ202-15	1	0.9839	0.85078
LFDAPEAPLPSR	MTOR	024_MSC292_PRM_D22.raw	4990119	394963615744	1.26344e-05	WJ202-15	1	0.9816	0.82563
TLDQSPELR	MTOR	001_MSC292_PRM_D22.raw	3302886	319390449664	1.03412e-05	WJ202-15	0	0.9787	0.925329
TLDQSPELR	MTOR	002_MSC292_PRM_D22.raw	4200926	351230066688	1.19606e-05	WJ202-15	0	0.977	1.07023
TLDQSPELR	MTOR	003_MSC292_PRM_D22.raw	4213607	375365763072	1.12253e-05	WJ202-15	0	0.989	1.00444
TLDQSPELR	MTOR	013_MSC292_PRM_D22.raw	1793454	341467299840	5.2522e-06	WJ202-15	1000	0.9762	0.469965
TLDQSPELR	MTOR	014_MSC292_PRM_D22.raw	2900190	374906847232	7.73576e-06	WJ202-15	1000	0.9665	0.692193
TLDQSPELR	MTOR	015_MSC292_PRM_D22.raw	4446794	411407319040	1.08087e-05	WJ202-15	1000	0.976	0.967162
TLDQSPELR	MTOR	016_MSC292_PRM_D22.raw	4179889	417004093440	1.00236e-05	WJ202-15	100	0.9853	0.89691
TLDQSPELR	MTOR	017_MSC292_PRM_D22.raw	3425973	393033089024	8.71675e-06	WJ202-15	100	0.9776	0.779972
TLDQSPELR	MTOR	018_MSC292_PRM_D22.raw	4438366	426928177152	1.0396e-05	WJ202-15	100	0.9799	0.930235
TLDQSPELR	MTOR	019_MSC292_PRM_D22.raw	4082259	430841298944	9.47509e-06	WJ202-15	10	0.9743	0.847828
TLDQSPELR	MTOR	020_MSC292_PRM_D22.raw	3893142	433670029312	8.9772e-06	WJ202-15	10	0.9779	0.803277
TLDQSPELR	MTOR	021_MSC292_PRM_D22.raw	3587398	376932859904	9.51734e-06	WJ202-15	10	0.9776	0.851609
TLDQSPELR	MTOR	022_MSC292_PRM_D22.raw	4095166	414246764544	9.88581e-06	WJ202-15	1	0.9722	0.884579
TLDQSPELR	MTOR	023_MSC292_PRM_D22.raw	3382869	368739975168	9.17413e-06	WJ202-15	1	0.979	0.820898
TLDQSPELR	MTOR	024_MSC292_PRM_D22.raw	4212897	394963615744	1.06665e-05	WJ202-15	1	0.9827	0.954439
YHPQALIYPLTVASK	MTOR	001_MSC292_PRM_D22.raw	642637	319390449664	2.01207e-06	WJ202-15	0	0.5749	0.99417
YHPQALIYPLTVASK	MTOR	002_MSC292_PRM_D22.raw	864628	351230066688	2.46171e-06	WJ202-15	0	0.6716	1.21634
YHPQALIYPLTVASK	MTOR	003_MSC292_PRM_D22.raw	599771	375365763072	1.59783e-06	WJ202-15	0	0.5605	0.789492
YHPQALIYPLTVASK	MTOR	013_MSC292_PRM_D22.raw	1200117	341467299840	3.51459e-06	WJ202-15	1000	0.7837	1.73657
YHPQALIYPLTVASK	MTOR	014_MSC292_PRM_D22.raw	1305935	374906847232	3.48336e-06	WJ202-15	1000	0.9167	1.72114
YHPQALIYPLTVASK	MTOR	015_MSC292_PRM_D22.raw	773922	411407319040	1.88116e-06	WJ202-15	1000	0.7661	0.929484
YHPQALIYPLTVASK	MTOR	016_MSC292_PRM_D22.raw	1159728	417004093440	2.7811e-06	WJ202-15	100	0.9233	1.37415
YHPQALIYPLTVASK	MTOR	017_MSC292_PRM_D22.raw	1069157	393033089024	2.72027e-06	WJ202-15	100	0.9027	1.34409
YHPQALIYPLTVASK	MTOR	018_MSC292_PRM_D22.raw	1372496	426928177152	3.21482e-06	WJ202-15	100	0.9474	1.58845
YHPQALIYPLTVASK	MTOR	019_MSC292_PRM_D22.raw	1202091	430841298944	2.7901e-06	WJ202-15	10	0.906	1.3786
YHPQALIYPLTVASK	MTOR	020_MSC292_PRM_D22.raw	1247573	433670029312	2.87678e-06	WJ202-15	10	0.8342	1.42142
YHPQALIYPLTVASK	MTOR	021_MSC292_PRM_D22.raw	1125417	376932859904	2.98572e-06	WJ202-15	10	0.9021	1.47525
YHPQALIYPLTVASK	MTOR	022_MSC292_PRM_D22.raw	1099056	414246764544	2.65314e-06	WJ202-15	1	0.9701	1.31092
YHPQALIYPLTVASK	MTOR	023_MSC292_PRM_D22.raw	1024653	368739975168	2.7788e-06	WJ202-15	1	0.8459	1.37301
YHPQALIYPLTVASK	MTOR	024_MSC292_PRM_D22.raw	838049	394963615744	2.12184e-06	WJ202-15	1	0.7815	1.04841
ETSFNQAYGR	MTOR	001_MSC292_PRM_D22.raw	1841333	319390449664	5.76515e-06	WJ202-15	0	0.9478	0.967594
ETSFNQAYGR	MTOR	002_MSC292_PRM_D22.raw	2212891	351230066688	6.3004e-06	WJ202-15	0	0.9463	1.05743
ETSFNQAYGR	MTOR	003_MSC292_PRM_D22.raw	2180549	375365763072	5.80913e-06	WJ202-15	0	0.9425	0.974976
ETSFNQAYGR	MTOR	013_MSC292_PRM_D22.raw	1031044	341467299840	3.01945e-06	WJ202-15	1000	0.9544	0.50677
ETSFNQAYGR	MTOR	014_MSC292_PRM_D22.raw	1497798	374906847232	3.99512e-06	WJ202-15	1000	0.946	0.670522
ETSFNQAYGR	MTOR	015_MSC292_PRM_D22.raw	2354214	411407319040	5.72234e-06	WJ202-15	1000	0.9351	0.96041
ETSFNQAYGR	MTOR	016_MSC292_PRM_D22.raw	2041439	417004093440	4.89549e-06	WJ202-15	100	0.9467	0.821635
ETSFNQAYGR	MTOR	017_MSC292_PRM_D22.raw	2031125	393033089024	5.16782e-06	WJ202-15	100	0.9479	0.867342
ETSFNQAYGR	MTOR	018_MSC292_PRM_D22.raw	2365972	426928177152	5.54185e-06	WJ202-15	100	0.9522	0.930117
ETSFNQAYGR	MTOR	019_MSC292_PRM_D22.raw	2092863	430841298944	4.85762e-06	WJ202-15	10	0.9407	0.815279
ETSFNQAYGR	MTOR	020_MSC292_PRM_D22.raw	2332642	433670029312	5.37884e-06	WJ202-15	10	0.9419	0.902759
ETSFNQAYGR	MTOR	021_MSC292_PRM_D22.raw	2071677	376932859904	5.49614e-06	WJ202-15	10	0.9498	0.922446
ETSFNQAYGR	MTOR	022_MSC292_PRM_D22.raw	2091615	414246764544	5.0492e-06	WJ202-15	1	0.9534	0.847433
ETSFNQAYGR	MTOR	023_MSC292_PRM_D22.raw	1883553	368739975168	5.10808e-06	WJ202-15	1	0.9503	0.857315
ETSFNQAYGR	MTOR	024_MSC292_PRM_D22.raw	2259299	394963615744	5.72027e-06	WJ202-15	1	0.9453	0.960063
DLELAVPGTYDPNQPIIR	MTOR	001_MSC292_PRM_D22.raw	2204690	319390449664	6.90281e-06	WJ202-15	0	0.9725	1.10026
DLELAVPGTYDPNQPIIR	MTOR	002_MSC292_PRM_D22.raw	2104480	351230066688	5.99174e-06	WJ202-15	0	0.9718	0.955041
DLELAVPGTYDPNQPIIR	MTOR	003_MSC292_PRM_D22.raw	2224745	375365763072	5.92687e-06	WJ202-15	0	0.9666	0.944701
DLELAVPGTYDPNQPIIR	MTOR	013_MSC292_PRM_D22.raw	2053349	341467299840	6.01331e-06	WJ202-15	1000	0.9777	0.958479
DLELAVPGTYDPNQPIIR	MTOR	014_MSC292_PRM_D22.raw	2182831	374906847232	5.82233e-06	WJ202-15	1000	0.9743	0.928038
DLELAVPGTYDPNQPIIR	MTOR	015_MSC292_PRM_D22.raw	2492229	411407319040	6.05781e-06	WJ202-15	1000	0.9634	0.965572
DLELAVPGTYDPNQPIIR	MTOR	016_MSC292_PRM_D22.raw	2266266	417004093440	5.43464e-06	WJ202-15	100	0.9773	0.866242
DLELAVPGTYDPNQPIIR	MTOR	017_MSC292_PRM_D22.raw	2059602	393033089024	5.24028e-06	WJ202-15	100	0.965	0.835263
DLELAVPGTYDPNQPIIR	MTOR	018_MSC292_PRM_D22.raw	2404507	426928177152	5.63211e-06	WJ202-15	100	0.9667	0.897718
DLELAVPGTYDPNQPIIR	MTOR	019_MSC292_PRM_D22.raw	2254281	430841298944	5.23228e-06	WJ202-15	10	0.9737	0.833988
DLELAVPGTYDPNQPIIR	MTOR	020_MSC292_PRM_D22.raw	2385842	433670029312	5.50151e-06	WJ202-15	10	0.9677	0.876902
DLELAVPGTYDPNQPIIR	MTOR	021_MSC292_PRM_D22.raw	2222296	376932859904	5.89573e-06	WJ202-15	10	0.9834	0.939738
DLELAVPGTYDPNQPIIR	MTOR	022_MSC292_PRM_D22.raw	2313100	414246764544	5.58387e-06	WJ202-15	1	0.9764	0.890029
DLELAVPGTYDPNQPIIR	MTOR	023_MSC292_PRM_D22.raw	2241083	368739975168	6.07768e-06	WJ202-15	1	0.977	0.968739
DLELAVPGTYDPNQPIIR	MTOR	024_MSC292_PRM_D22.raw	2518447	394963615744	6.3764e-06	WJ202-15	1	0.9763	1.01635
LFDAPEAPLPSR	MTOR	001_MSC292_PRM_D22.raw	5216355	319390449664	1.63322e-05	WJ201-13	0	0.9835	1.06728
LFDAPEAPLPSR	MTOR	002_MSC292_PRM_D22.raw	5541101	351230066688	1.57763e-05	WJ201-13	0	0.9867	1.03095
LFDAPEAPLPSR	MTOR	003_MSC292_PRM_D22.raw	5179915	375365763072	1.37996e-05	WJ201-13	0	0.9831	0.901778
LFDAPEAPLPSR	MTOR	004_MSC292_PRM_D22.raw	5184993	367054553088	1.41259e-05	WJ201-13	100	0.9807	0.923101
LFDAPEAPLPSR	MTOR	005_MSC292_PRM_D22.raw	4811943	336322068480	1.43075e-05	WJ201-13	100	0.9842	0.934968
LFDAPEAPLPSR	MTOR	006_MSC292_PRM_D22.raw	5041786	378640007168	1.33155e-05	WJ201-13	100	0.9776	0.870141
LFDAPEAPLPSR	MTOR	007_MSC292_PRM_D22.raw	4525624	400295821312	1.13057e-05	WJ201-13	10	0.9803	0.738804
LFDAPEAPLPSR	MTOR	008_MSC292_PRM_D22.raw	5132259	381586702336	1.34498e-05	WJ201-13	10	0.9809	0.878915
LFDAPEAPLPSR	MTOR	009_MSC292_PRM_D22.raw	4543352	357919522816	1.26938e-05	WJ201-13	10	0.9741	0.829512
LFDAPEAPLPSR	MTOR	010_MSC292_PRM_D22.raw	5165261	388651122688	1.32902e-05	WJ201-13	1	0.9797	0.868488
LFDAPEAPLPSR	MTOR	011_MSC292_PRM_D22.raw	4720432	400786063360	1.17779e-05	WJ201-13	1	0.9801	0.769663
LFDAPEAPLPSR	MTOR	012_MSC292_PRM_D22.raw	4775132	386939125760	1.23408e-05	WJ201-13	1	0.9848	0.806444
TLDQSPELR	MTOR	001_MSC292_PRM_D22.raw	3302886	319390449664	1.03412e-05	WJ201-13	0	0.9787	0.925329
TLDQSPELR	MTOR	002_MSC292_PRM_D22.raw	4200926	351230066688	1.19606e-05	WJ201-13	0	0.977	1.07023
TLDQSPELR	MTOR	003_MSC292_PRM_D22.raw	4213607	375365763072	1.12253e-05	WJ201-13	0	0.989	1.00444
TLDQSPELR	MTOR	004_MSC292_PRM_D22.raw	3875295	367054553088	1.05578e-05	WJ201-13	100	0.978	0.94471
TLDQSPELR	MTOR	005_MSC292_PRM_D22.raw	3772876	336322068480	1.1218e-05	WJ201-13	100	0.978	1.00379
TLDQSPELR	MTOR	006_MSC292_PRM_D22.raw	3735850	378640007168	9.8665e-06	WJ201-13	100	0.9847	0.882851
TLDQSPELR	MTOR	007_MSC292_PRM_D22.raw	4091997	400295821312	1.02224e-05	WJ201-13	10	0.978	0.9147
TLDQSPELR	MTOR	008_MSC292_PRM_D22.raw	3860241	381586702336	1.01163e-05	WJ201-13	10	0.9875	0.905202
TLDQSPELR	MTOR	009_MSC292_PRM_D22.raw	4766542	357919522816	1.33174e-05	WJ201-13	10	0.9844	1.19163
TLDQSPELR	MTOR	010_MSC292_PRM_D22.raw	3729663	388651122688	9.59643e-06	WJ201-13	1	0.974	0.858685
TLDQSPELR	MTOR	011_MSC292_PRM_D22.raw	3899718	400786063360	9.73017e-06	WJ201-13	1	0.9797	0.870653
TLDQSPELR	MTOR	012_MSC292_PRM_D22.raw	3807034	386939125760	9.83884e-06	WJ201-13	1	0.9782	0.880377
YHPQALIYPLTVASK	MTOR	001_MSC292_PRM_D22.raw	642637	319390449664	2.01207e-06	WJ201-13	0	0.5749	0.99417
YHPQALIYPLTVASK	MTOR	002_MSC292_PRM_D22.raw	864628	351230066688	2.46171e-06	WJ201-13	0	0.6716	1.21634
YHPQALIYPLTVASK	MTOR	003_MSC292_PRM_D22.raw	599771	375365763072	1.59783e-06	WJ201-13	0	0.5605	0.789492
YHPQALIYPLTVASK	MTOR	004_MSC292_PRM_D22.raw	645038	367054553088	1.75734e-06	WJ201-13	100	0.5697	0.868303
YHPQALIYPLTVASK	MTOR	005_MSC292_PRM_D22.raw	809428	336322068480	2.4067e-06	WJ201-13	100	0.7145	1.18916
YHPQALIYPLTVASK	MTOR	006_MSC292_PRM_D22.raw	618796	378640007168	1.63426e-06	WJ201-13	100	0.6487	0.807491
YHPQALIYPLTVASK	MTOR	007_MSC292_PRM_D22.raw	874832	400295821312	2.18546e-06	WJ201-13	10	0.8005	1.07984
YHPQALIYPLTVASK	MTOR	008_MSC292_PRM_D22.raw	698119	381586702336	1.82952e-06	WJ201-13	10	0.7076	0.903968
YHPQALIYPLTVASK	MTOR	009_MSC292_PRM_D22.raw	958771	357919522816	2.67873e-06	WJ201-13	10	0.8342	1.32357
YHPQALIYPLTVASK	MTOR	010_MSC292_PRM_D22.raw	1090873	388651122688	2.80682e-06	WJ201-13	1	0.7266	1.38686
YHPQALIYPLTVASK	MTOR	011_MSC292_PRM_D22.raw	691032	400786063360	1.72419e-06	WJ201-13	1	0.651	0.851927
YHPQALIYPLTVASK	MTOR	012_MSC292_PRM_D22.raw	1127248	386939125760	2.91324e-06	WJ201-13	1	0.7519	1.43944
ETSFNQAYGR	MTOR	001_MSC292_PRM_D22.raw	1841333	319390449664	5.76515e-06	WJ201-13	0	0.9478	0.967594
ETSFNQAYGR	MTOR	002_MSC292_PRM_D22.raw	2212891	351230066688	6.3004e-06	WJ201-13	0	0.9463	1.05743
ETSFNQAYGR	MTOR	003_MSC292_PRM_D22.raw	2180549	375365763072	5.80913e-06	WJ201-13	0	0.9425	0.974976
ETSFNQAYGR	MTOR	004_MSC292_PRM_D22.raw	1852751	367054553088	5.04762e-06	WJ201-13	100	0.943	0.847168
ETSFNQAYGR	MTOR	005_MSC292_PRM_D22.raw	1790743	336322068480	5.32449e-06	WJ201-13	100	0.9547	0.893636
ETSFNQAYGR	MTOR	006_MSC292_PRM_D22.raw	1976493	378640007168	5.21998e-06	WJ201-13	100	0.9482	0.876096
ETSFNQAYGR	MTOR	007_MSC292_PRM_D22.raw	1981983	400295821312	4.9513e-06	WJ201-13	10	0.9468	0.831001
ETSFNQAYGR	MTOR	008_MSC292_PRM_D22.raw	2024265	381586702336	5.30486e-06	WJ201-13	10	0.9379	0.890342
ETSFNQAYGR	MTOR	009_MSC292_PRM_D22.raw	2315138	357919522816	6.46832e-06	WJ201-13	10	0.9436	1.08561
ETSFNQAYGR	MTOR	010_MSC292_PRM_D22.raw	1760252	388651122688	4.52913e-06	WJ201-13	1	0.9517	0.760147
ETSFNQAYGR	MTOR	011_MSC292_PRM_D22.raw	1952387	400786063360	4.87139e-06	WJ201-13	1	0.9405	0.817591
ETSFNQAYGR	MTOR	012_MSC292_PRM_D22.raw	2027116	386939125760	5.23885e-06	WJ201-13	1	0.9604	0.879263
DLELAVPGTYDPNQPIIR	MTOR	001_MSC292_PRM_D22.raw	2204690	319390449664	6.90281e-06	WJ201-13	0	0.9725	1.10026
DLELAVPGTYDPNQPIIR	MTOR	002_MSC292_PRM_D22.raw	2104480	351230066688	5.99174e-06	WJ201-13	0	0.9718	0.955041
DLELAVPGTYDPNQPIIR	MTOR	003_MSC292_PRM_D22.raw	2224745	375365763072	5.92687e-06	WJ201-13	0	0.9666	0.944701
DLELAVPGTYDPNQPIIR	MTOR	004_MSC292_PRM_D22.raw	2045498	367054553088	5.57274e-06	WJ201-13	100	0.9765	0.888254
DLELAVPGTYDPNQPIIR	MTOR	005_MSC292_PRM_D22.raw	1830991	336322068480	5.44416e-06	WJ201-13	100	0.9781	0.86776
DLELAVPGTYDPNQPIIR	MTOR	006_MSC292_PRM_D22.raw	1937767	378640007168	5.1177e-06	WJ201-13	100	0.9677	0.815725
DLELAVPGTYDPNQPIIR	MTOR	007_MSC292_PRM_D22.raw	2170284	400295821312	5.4217e-06	WJ201-13	10	0.9791	0.86418
DLELAVPGTYDPNQPIIR	MTOR	008_MSC292_PRM_D22.raw	1968650	381586702336	5.15912e-06	WJ201-13	10	0.9673	0.822326
DLELAVPGTYDPNQPIIR	MTOR	009_MSC292_PRM_D22.raw	2394011	357919522816	6.68869e-06	WJ201-13	10	0.9811	1.06613
DLELAVPGTYDPNQPIIR	MTOR	010_MSC292_PRM_D22.raw	2131188	388651122688	5.48355e-06	WJ201-13	1	0.9732	0.874039
DLELAVPGTYDPNQPIIR	MTOR	011_MSC292_PRM_D22.raw	1935617	400786063360	4.82955e-06	WJ201-13	1	0.9778	0.769796
DLELAVPGTYDPNQPIIR	MTOR	012_MSC292_PRM_D22.raw	2085522	386939125760	5.38979e-06	WJ201-13	1	0.9828	0.859095
LFDAPEAPLPSR	MTOR	001_MSC351_PRM_rr_D23.raw	2744282	145432166400	1.88698e-05	WJ200-12	0	0.9769	0.985917
LFDAPEAPLPSR	MTOR	002_MSC351_PRM_rr_D23.raw	2544099	142938210304	1.77986e-05	WJ200-12	0	0.9769	0.929946
LFDAPEAPLPSR	MTOR	003_MSC351_PRM_rr_D23.raw	3840811	185102123008	2.07497e-05	WJ200-12	0	0.984	1.08414
LFDAPEAPLPSR	MTOR	016_MSC351_PRM_rr_D23.raw	4133644	191146721280	2.16255e-05	WJ200-12	1000	0.9778	1.1299
LFDAPEAPLPSR	MTOR	017_MSC351_PRM_rr_D23.raw	3441545	217256116224	1.5841e-05	WJ200-12	1000	0.9797	0.827663
LFDAPEAPLPSR	MTOR	018_MSC351_PRM_rr_D23.raw	3723138	220602925056	1.68771e-05	WJ200-12	1000	0.9745	0.8818
LFDAPEAPLPSR	MTOR	019_MSC351_PRM_rr_D23.raw	3279834	224932495360	1.45814e-05	WJ200-12	100	0.984	0.761854
LFDAPEAPLPSR	MTOR	020_MSC351_PRM_rr_D23.raw	3519146	212186578944	1.65851e-05	WJ200-12	100	0.9845	0.866546
LFDAPEAPLPSR	MTOR	021_MSC351_PRM_rr_D23.raw	5098944	267974606848	1.90277e-05	WJ200-12	100	0.9685	0.994166
LFDAPEAPLPSR	MTOR	022_MSC351_PRM_rr_D23.raw	5241949	361627746304	1.44954e-05	WJ200-12	10	0.9755	0.757362
LFDAPEAPLPSR	MTOR	023_MSC351_PRM_rr_D23.raw	6195861	322343763968	1.92213e-05	WJ200-12	10	0.9803	1.00428
LFDAPEAPLPSR	MTOR	024_MSC351_PRM_rr_D23.raw	6035734	302207991808	1.99721e-05	WJ200-12	10	0.9785	1.04351
LFDAPEAPLPSR	MTOR	025_MSC351_PRM_rr_D23.raw	6315641	287567151104	2.19623e-05	WJ200-12	1	0.9758	1.14749
LFDAPEAPLPSR	MTOR	026_MSC351_PRM_rr_D23.raw	6740906	300883050496	2.24037e-05	WJ200-12	1	0.9844	1.17056
LFDAPEAPLPSR	MTOR	027_MSC351_PRM_rr_D23.raw	8003471	381354672128	2.09869e-05	WJ200-12	1	0.9922	1.09653
TLDQSPELR	MTOR	001_MSC351_PRM_rr_D23.raw	1674852	145432166400	1.15164e-05	WJ200-12	0	0.9959	1.03431
TLDQSPELR	MTOR	002_MSC351_PRM_rr_D23.raw	1776608	142938210304	1.24292e-05	WJ200-12	0	0.9768	1.11629
TLDQSPELR	MTOR	003_MSC351_PRM_rr_D23.raw	1750598	185102123008	9.45747e-06	WJ200-12	0	0.9855	0.849396
TLDQSPELR	MTOR	016_MSC351_PRM_rr_D23.raw	2273202	191146721280	1.18924e-05	WJ200-12	1000	0.9814	1.06809
TLDQSPELR	MTOR	017_MSC351_PRM_rr_D23.raw	3002729	217256116224	1.38211e-05	WJ200-12	1000	0.9912	1.24131
TLDQSPELR	MTOR	018_MSC351_PRM_rr_D23.raw	2829665	220602925056	1.2827e-05	WJ200-12	1000	0.9889	1.15202
TLDQSPELR	MTOR	019_MSC351_PRM_rr_D23.raw	1918743	224932495360	8.53031e-06	WJ200-12	100	0.981	0.766125
TLDQSPELR	MTOR	020_MSC351_PRM_rr_D23.raw	2781608	212186578944	1.31093e-05	WJ200-12	100	0.9739	1.17737
TLDQSPELR	MTOR	021_MSC351_PRM_rr_D23.raw	2950454	267974606848	1.10102e-05	WJ200-12	100	0.985	0.98885
TLDQSPELR	MTOR	022_MSC351_PRM_rr_D23.raw	3420014	361627746304	9.45728e-06	WJ200-12	10	0.9784	0.849378
TLDQSPELR	MTOR	023_MSC351_PRM_rr_D23.raw	3042381	322343763968	9.43831e-06	WJ200-12	10	0.9856	0.847675
TLDQSPELR	MTOR	024_MSC351_PRM_rr_D23.raw	3190598	302207991808	1.05576e-05	WJ200-12	10	0.9787	0.948203
TLDQSPELR	MTOR	025_MSC351_PRM_rr_D23.raw	2916252	287567151104	1.01411e-05	WJ200-12	1	0.9872	0.910795
TLDQSPELR	MTOR	026_MSC351_PRM_rr_D23.raw	4117462	300883050496	1.36846e-05	WJ200-12	1	0.9736	1.22904
TLDQSPELR	MTOR	027_MSC351_PRM_rr_D23.raw	3992756	381354672128	1.04699e-05	WJ200-12	1	0.9787	0.940327
YHPQALIYPLTVASK	MTOR	001_MSC351_PRM_rr_D23.raw	749110	145432166400	5.15092e-06	WJ200-12	0	0.9783	0.826931
YHPQALIYPLTVASK	MTOR	002_MSC351_PRM_rr_D23.raw	977315	142938210304	6.83733e-06	WJ200-12	0	0.9865	1.09767
YHPQALIYPLTVASK	MTOR	003_MSC351_PRM_rr_D23.raw	1239933	185102123008	6.69864e-06	WJ200-12	0	0.9773	1.0754
YHPQALIYPLTVASK	MTOR	016_MSC351_PRM_rr_D23.raw	1457362	191146721280	7.62431e-06	WJ200-12	1000	0.9838	1.22401
YHPQALIYPLTVASK	MTOR	017_MSC351_PRM_rr_D23.raw	1103372	217256116224	5.07867e-06	WJ200-12	1000	0.9734	0.815331
YHPQALIYPLTVASK	MTOR	018_MSC351_PRM_rr_D23.raw	1095233	220602925056	4.96473e-06	WJ200-12	1000	0.9829	0.797039
YHPQALIYPLTVASK	MTOR	019_MSC351_PRM_rr_D23.raw	1289313	224932495360	5.732e-06	WJ200-12	100	0.9895	0.920217
YHPQALIYPLTVASK	MTOR	020_MSC351_PRM_rr_D23.raw	1015437	212186578944	4.78559e-06	WJ200-12	100	0.9761	0.76828
YHPQALIYPLTVASK	MTOR	021_MSC351_PRM_rr_D23.raw	1265489	267974606848	4.72242e-06	WJ200-12	100	0.9907	0.758139
YHPQALIYPLTVASK	MTOR	022_MSC351_PRM_rr_D23.raw	1078113	361627746304	2.98128e-06	WJ200-12	10	0.9802	0.478615
YHPQALIYPLTVASK	MTOR	023_MSC351_PRM_rr_D23.raw	1370433	322343763968	4.25146e-06	WJ200-12	10	0.9836	0.682532
YHPQALIYPLTVASK	MTOR	024_MSC351_PRM_rr_D23.raw	1826313	302207991808	6.04323e-06	WJ200-12	10	0.9797	0.970183
YHPQALIYPLTVASK	MTOR	025_MSC351_PRM_rr_D23.raw	1791570	287567151104	6.23009e-06	WJ200-12	1	0.9803	1.00018
YHPQALIYPLTVASK	MTOR	026_MSC351_PRM_rr_D23.raw	1625582	300883050496	5.4027e-06	WJ200-12	1	0.9794	0.867352
YHPQALIYPLTVASK	MTOR	027_MSC351_PRM_rr_D23.raw	1910416	381354672128	5.00955e-06	WJ200-12	1	0.9858	0.804235
ETSFNQAYGR	MTOR	001_MSC351_PRM_rr_D23.raw	667054	145432166400	4.5867e-06	WJ200-12	0	0.9475	1.59634
ETSFNQAYGR	MTOR	002_MSC351_PRM_rr_D23.raw	280076	142938210304	1.95942e-06	WJ200-12	0	0.9417	0.68195
ETSFNQAYGR	MTOR	003_MSC351_PRM_rr_D23.raw	383838	185102123008	2.07366e-06	WJ200-12	0	0.9546	0.721708
ETSFNQAYGR	MTOR	016_MSC351_PRM_rr_D23.raw	1234648	191146721280	6.45916e-06	WJ200-12	1000	0.9573	2.24803
ETSFNQAYGR	MTOR	017_MSC351_PRM_rr_D23.raw	1078142	217256116224	4.96254e-06	WJ200-12	1000	0.9429	1.72715
ETSFNQAYGR	MTOR	018_MSC351_PRM_rr_D23.raw	1108465	220602925056	5.02471e-06	WJ200-12	1000	0.9507	1.74878
ETSFNQAYGR	MTOR	019_MSC351_PRM_rr_D23.raw	852116	224932495360	3.78832e-06	WJ200-12	100	0.9462	1.31847
ETSFNQAYGR	MTOR	020_MSC351_PRM_rr_D23.raw	1029410	212186578944	4.85144e-06	WJ200-12	100	0.9407	1.68848
ETSFNQAYGR	MTOR	021_MSC351_PRM_rr_D23.raw	987704	267974606848	3.68581e-06	WJ200-12	100	0.9603	1.2828
ETSFNQAYGR	MTOR	022_MSC351_PRM_rr_D23.raw	1196370	361627746304	3.30829e-06	WJ200-12	10	0.9239	1.15141
ETSFNQAYGR	MTOR	023_MSC351_PRM_rr_D23.raw	1308850	322343763968	4.06042e-06	WJ200-12	10	0.9421	1.41317
ETSFNQAYGR	MTOR	024_MSC351_PRM_rr_D23.raw	1467854	302207991808	4.8571e-06	WJ200-12	10	0.9465	1.69045
ETSFNQAYGR	MTOR	025_MSC351_PRM_rr_D23.raw	1594246	287567151104	5.54391e-06	WJ200-12	1	0.9537	1.92948
ETSFNQAYGR	MTOR	026_MSC351_PRM_rr_D23.raw	1795052	300883050496	5.96595e-06	WJ200-12	1	0.9496	2.07637
ETSFNQAYGR	MTOR	027_MSC351_PRM_rr_D23.raw	1397262	381354672128	3.66394e-06	WJ200-12	1	0.9354	1.27519
DLELAVPGTYDPNQPIIR	MTOR	001_MSC351_PRM_rr_D23.raw	629395	145432166400	4.32776e-06	WJ200-12	0	0.8834	0.714986
DLELAVPGTYDPNQPIIR	MTOR	002_MSC351_PRM_rr_D23.raw	1176682	142938210304	8.2321e-06	WJ200-12	0	0.9554	1.36002
DLELAVPGTYDPNQPIIR	MTOR	003_MSC351_PRM_rr_D23.raw	1036373	185102123008	5.59893e-06	WJ200-12	0	0.9606	0.924995
DLELAVPGTYDPNQPIIR	MTOR	016_MSC351_PRM_rr_D23.raw	937534	191146721280	4.90479e-06	WJ200-12	1000	0.9686	0.810316
DLELAVPGTYDPNQPIIR	MTOR	017_MSC351_PRM_rr_D23.raw	1028200	217256116224	4.73266e-06	WJ200-12	1000	0.9779	0.78188
DLELAVPGTYDPNQPIIR	MTOR	018_MSC351_PRM_rr_D23.raw	1147841	220602925056	5.2032e-06	WJ200-12	1000	0.9768	0.859617
DLELAVPGTYDPNQPIIR	MTOR	019_MSC351_PRM_rr_D23.raw	879107	224932495360	3.90831e-06	WJ200-12	100	0.9774	0.64569
DLELAVPGTYDPNQPIIR	MTOR	020_MSC351_PRM_rr_D23.raw	983209	212186578944	4.6337e-06	WJ200-12	100	0.9716	0.76553
DLELAVPGTYDPNQPIIR	MTOR	021_MSC351_PRM_rr_D23.raw	1292925	267974606848	4.8248e-06	WJ200-12	100	0.9803	0.797102
DLELAVPGTYDPNQPIIR	MTOR	022_MSC351_PRM_rr_D23.raw	1862244	361627746304	5.14962e-06	WJ200-12	10	0.9793	0.850764
DLELAVPGTYDPNQPIIR	MTOR	023_MSC351_PRM_rr_D23.raw	1482768	322343763968	4.59996e-06	WJ200-12	10	0.9605	0.759956
DLELAVPGTYDPNQPIIR	MTOR	024_MSC351_PRM_rr_D23.raw	1375766	302207991808	4.55238e-06	WJ200-12	10	0.9803	0.752096
DLELAVPGTYDPNQPIIR	MTOR	025_MSC351_PRM_rr_D23.raw	1646759	287567151104	5.72652e-06	WJ200-12	1	0.9718	0.946074
DLELAVPGTYDPNQPIIR	MTOR	026_MSC351_PRM_rr_D23.raw	1763882	300883050496	5.86235e-06	WJ200-12	1	0.9563	0.968515
DLELAVPGTYDPNQPIIR	MTOR	027_MSC351_PRM_rr_D23.raw	1511067	381354672128	3.96237e-06	WJ200-12	1	0.947	0.65462
LFDAPEAPLPSR	MTOR	001_MSC349_PRM_r_D23.raw	3048187	234732617728	1.29858e-05	WJ117-16	0	0.9601	1.02542
LFDAPEAPLPSR	MTOR	002_MSC349_PRM_r_D23.raw	3155411	228691574784	1.37977e-05	WJ117-16	0	0.9665	1.08953
LFDAPEAPLPSR	MTOR	003_MSC349_PRM_r_D23.raw	3384830	301996474368	1.12082e-05	WJ117-16	0	0.972	0.885051
LFDAPEAPLPSR	MTOR	016_MSC349_PRM_r_D23.raw	3459386	227307044864	1.5219e-05	WJ117-16	10000	0.9567	1.20176
LFDAPEAPLPSR	MTOR	017_MSC349_PRM_r_D23.raw	3575959	238944960512	1.49656e-05	WJ117-16	10000	0.9751	1.18176
LFDAPEAPLPSR	MTOR	018_MSC349_PRM_r_D23.raw	3811954	264316026880	1.4422e-05	WJ117-16	10000	0.9646	1.13883
LFDAPEAPLPSR	MTOR	019_MSC349_PRM_r_D23.raw	2877089	274307579904	1.04886e-05	WJ117-16	1000	0.9571	0.828226
LFDAPEAPLPSR	MTOR	020_MSC349_PRM_r_D23.raw	4811464	365284229120	1.31718e-05	WJ117-16	1000	0.9685	1.04011
LFDAPEAPLPSR	MTOR	021_MSC349_PRM_r_D23.raw	4278170	323193667584	1.32372e-05	WJ117-16	1000	0.9661	1.04527
LFDAPEAPLPSR	MTOR	022_MSC349_PRM_r_D23.raw	3865465	294620758016	1.31201e-05	WJ117-16	100	0.9662	1.03603
LFDAPEAPLPSR	MTOR	023_MSC349_PRM_r_D23.raw	4510732	403563610112	1.11773e-05	WJ117-16	100	0.9722	0.882609
LFDAPEAPLPSR	MTOR	024_MSC349_PRM_r_D23.raw	4165664	331717935104	1.25578e-05	WJ117-16	100	0.9674	0.991628
LFDAPEAPLPSR	MTOR	025_MSC349_PRM_r_D23.raw	2771781	228084514816	1.21524e-05	WJ117-16	10	0.9603	0.959614
LFDAPEAPLPSR	MTOR	026_MSC349_PRM_r_D23.raw	4749288	354685550592	1.33901e-05	WJ117-16	10	0.9697	1.05735
LFDAPEAPLPSR	MTOR	027_MSC349_PRM_r_D23.raw	4615524	366914961408	1.25793e-05	WJ117-16	10	0.9749	0.993319
TLDQSPELR	MTOR	001_MSC349_PRM_r_D23.raw	3318768	234732617728	1.41385e-05	WJ117-16	0	0.9646	1.07494
TLDQSPELR	MTOR	002_MSC349_PRM_r_D23.raw	2985077	228691574784	1.30529e-05	WJ117-16	0	0.9722	0.992403
TLDQSPELR	MTOR	003_MSC349_PRM_r_D23.raw	3704578	301996474368	1.2267e-05	WJ117-16	0	0.9717	0.932652
TLDQSPELR	MTOR	016_MSC349_PRM_r_D23.raw	3553955	227307044864	1.5635e-05	WJ117-16	10000	0.9796	1.18873
TLDQSPELR	MTOR	017_MSC349_PRM_r_D23.raw	3502571	238944960512	1.46585e-05	WJ117-16	10000	0.972	1.11448
TLDQSPELR	MTOR	018_MSC349_PRM_r_D23.raw	3623161	264316026880	1.37077e-05	WJ117-16	10000	0.9662	1.04219
TLDQSPELR	MTOR	019_MSC349_PRM_r_D23.raw	3461011	274307579904	1.26173e-05	WJ117-16	1000	0.9872	0.959286
TLDQSPELR	MTOR	020_MSC349_PRM_r_D23.raw	4695572	365284229120	1.28546e-05	WJ117-16	1000	0.9854	0.977328
TLDQSPELR	MTOR	021_MSC349_PRM_r_D23.raw	4422442	323193667584	1.36836e-05	WJ117-16	1000	0.9715	1.04036
TLDQSPELR	MTOR	022_MSC349_PRM_r_D23.raw	4305012	294620758016	1.4612e-05	WJ117-16	100	0.9684	1.11095
TLDQSPELR	MTOR	023_MSC349_PRM_r_D23.raw	5352330	403563610112	1.32627e-05	WJ117-16	100	0.9662	1.00836
TLDQSPELR	MTOR	024_MSC349_PRM_r_D23.raw	3841403	331717935104	1.15803e-05	WJ117-16	100	0.9619	0.880448
TLDQSPELR	MTOR	025_MSC349_PRM_r_D23.raw	3159051	228084514816	1.38504e-05	WJ117-16	10	0.9593	1.05304
TLDQSPELR	MTOR	026_MSC349_PRM_r_D23.raw	4703609	354685550592	1.32613e-05	WJ117-16	10	0.94	1.00826
TLDQSPELR	MTOR	027_MSC349_PRM_r_D23.raw	4773085	366914961408	1.30087e-05	WJ117-16	10	0.9812	0.989046
YHPQALIYPLTVASK	MTOR	001_MSC349_PRM_r_D23.raw	708584	234732617728	3.01869e-06	WJ117-16	0	0.941	1.00714
YHPQALIYPLTVASK	MTOR	002_MSC349_PRM_r_D23.raw	875900	228691574784	3.83005e-06	WJ117-16	0	0.9386	1.27784
YHPQALIYPLTVASK	MTOR	003_MSC349_PRM_r_D23.raw	647221	301996474368	2.14314e-06	WJ117-16	0	0.9181	0.715026
YHPQALIYPLTVASK	MTOR	016_MSC349_PRM_r_D23.raw	1041041	227307044864	4.57989e-06	WJ117-16	10000	0.9676	1.52801
YHPQALIYPLTVASK	MTOR	017_MSC349_PRM_r_D23.raw	859616	238944960512	3.59755e-06	WJ117-16	10000	0.9694	1.20027
YHPQALIYPLTVASK	MTOR	018_MSC349_PRM_r_D23.raw	1151869	264316026880	4.35792e-06	WJ117-16	10000	0.9636	1.45395
YHPQALIYPLTVASK	MTOR	019_MSC349_PRM_r_D23.raw	817219	274307579904	2.97921e-06	WJ117-16	1000	0.9728	0.993966
YHPQALIYPLTVASK	MTOR	020_MSC349_PRM_r_D23.raw	1340218	365284229120	3.66897e-06	WJ117-16	1000	0.9685	1.2241
YHPQALIYPLTVASK	MTOR	021_MSC349_PRM_r_D23.raw	1013311	323193667584	3.13531e-06	WJ117-16	1000	0.9809	1.04605
YHPQALIYPLTVASK	MTOR	022_MSC349_PRM_r_D23.raw	893621	294620758016	3.03312e-06	WJ117-16	100	0.9678	1.01195
YHPQALIYPLTVASK	MTOR	023_MSC349_PRM_r_D23.raw	1006683	403563610112	2.49448e-06	WJ117-16	100	0.9452	0.832246
YHPQALIYPLTVASK	MTOR	024_MSC349_PRM_r_D23.raw	1293971	331717935104	3.90082e-06	WJ117-16	100	0.9795	1.30145
YHPQALIYPLTVASK	MTOR	025_MSC349_PRM_r_D23.raw	832598	228084514816	3.65039e-06	WJ117-16	10	0.9642	1.2179
YHPQALIYPLTVASK	MTOR	026_MSC349_PRM_r_D23.raw	1085247	354685550592	3.05974e-06	WJ117-16	10	0.9718	1.02084
YHPQALIYPLTVASK	MTOR	027_MSC349_PRM_r_D23.raw	236599	366914961408	6.44833e-07	WJ117-16	10	0.806	0.215139
ETSFNQAYGR	MTOR	001_MSC349_PRM_r_D23.raw	1194094	234732617728	5.08704e-06	WJ117-16	0	0.9354	1.0227
ETSFNQAYGR	MTOR	002_MSC349_PRM_r_D23.raw	1279069	228691574784	5.59299e-06	WJ117-16	0	0.9406	1.12441
ETSFNQAYGR	MTOR	003_MSC349_PRM_r_D23.raw	1281193	301996474368	4.24241e-06	WJ117-16	0	0.9415	0.852892
ETSFNQAYGR	MTOR	016_MSC349_PRM_r_D23.raw	1157128	227307044864	5.09059e-06	WJ117-16	10000	0.9395	1.02341
ETSFNQAYGR	MTOR	017_MSC349_PRM_r_D23.raw	1157088	238944960512	4.84249e-06	WJ117-16	10000	0.9412	0.973532
ETSFNQAYGR	MTOR	018_MSC349_PRM_r_D23.raw	1351773	264316026880	5.11423e-06	WJ117-16	10000	0.9323	1.02816
ETSFNQAYGR	MTOR	019_MSC349_PRM_r_D23.raw	988065	274307579904	3.60203e-06	WJ117-16	1000	0.945	0.724151
ETSFNQAYGR	MTOR	020_MSC349_PRM_r_D23.raw	1786596	365284229120	4.89097e-06	WJ117-16	1000	0.9429	0.983279
ETSFNQAYGR	MTOR	021_MSC349_PRM_r_D23.raw	1559036	323193667584	4.82384e-06	WJ117-16	1000	0.9456	0.969784
ETSFNQAYGR	MTOR	022_MSC349_PRM_r_D23.raw	1133511	294620758016	3.84736e-06	WJ117-16	100	0.9475	0.773471
ETSFNQAYGR	MTOR	023_MSC349_PRM_r_D23.raw	1709947	403563610112	4.23712e-06	WJ117-16	100	0.9412	0.851828
ETSFNQAYGR	MTOR	024_MSC349_PRM_r_D23.raw	1455335	331717935104	4.38727e-06	WJ117-16	100	0.9328	0.882014
ETSFNQAYGR	MTOR	025_MSC349_PRM_r_D23.raw	918760	228084514816	4.02816e-06	WJ117-16	10	0.9325	0.809819
ETSFNQAYGR	MTOR	026_MSC349_PRM_r_D23.raw	1388952	354685550592	3.91601e-06	WJ117-16	10	0.948	0.787273
ETSFNQAYGR	MTOR	027_MSC349_PRM_r_D23.raw	1633388	366914961408	4.45168e-06	WJ117-16	10	0.9407	0.894964
DLELAVPGTYDPNQPIIR	MTOR	001_MSC349_PRM_r_D23.raw	1153490	234732617728	4.91406e-06	WJ117-16	0	0.9285	0.992313
DLELAVPGTYDPNQPIIR	MTOR	002_MSC349_PRM_r_D23.raw	1129640	228691574784	4.93958e-06	WJ117-16	0	0.929	0.997466
DLELAVPGTYDPNQPIIR	MTOR	003_MSC349_PRM_r_D23.raw	1510811	301996474368	5.00274e-06	WJ117-16	0	0.9472	1.01022
DLELAVPGTYDPNQPIIR	MTOR	016_MSC349_PRM_r_D23.raw	1148121	227307044864	5.05097e-06	WJ117-16	10000	0.9391	1.01996
DLELAVPGTYDPNQPIIR	MTOR	017_MSC349_PRM_r_D23.raw	1089472	238944960512	4.55951e-06	WJ117-16	10000	0.9142	0.920718
DLELAVPGTYDPNQPIIR	MTOR	018_MSC349_PRM_r_D23.raw	855957	264316026880	3.23838e-06	WJ117-16	10000	0.9183	0.653938
DLELAVPGTYDPNQPIIR	MTOR	019_MSC349_PRM_r_D23.raw	252965	274307579904	9.22195e-07	WJ117-16	1000	0.8939	0.186222
DLELAVPGTYDPNQPIIR	MTOR	020_MSC349_PRM_r_D23.raw	1034294	365284229120	2.83148e-06	WJ117-16	1000	0.9218	0.57177
DLELAVPGTYDPNQPIIR	MTOR	021_MSC349_PRM_r_D23.raw	788696	323193667584	2.44032e-06	WJ117-16	1000	0.8597	0.492782
DLELAVPGTYDPNQPIIR	MTOR	022_MSC349_PRM_r_D23.raw	708081	294620758016	2.40336e-06	WJ117-16	100	0.8478	0.48532
DLELAVPGTYDPNQPIIR	MTOR	023_MSC349_PRM_r_D23.raw	425697	403563610112	1.05484e-06	WJ117-16	100	0.83	0.213008
DLELAVPGTYDPNQPIIR	MTOR	024_MSC349_PRM_r_D23.raw	604895	331717935104	1.82352e-06	WJ117-16	100	0.9409	0.36823
DLELAVPGTYDPNQPIIR	MTOR	025_MSC349_PRM_r_D23.raw	699787	228084514816	3.0681e-06	WJ117-16	10	0.906	0.619553
DLELAVPGTYDPNQPIIR	MTOR	026_MSC349_PRM_r_D23.raw	1791533	354685550592	5.05105e-06	WJ117-16	10	0.9453	1.01997
DLELAVPGTYDPNQPIIR	MTOR	027_MSC349_PRM_r_D23.raw	72060	366914961408	1.96394e-07	WJ117-16	10	0.7838	0.0396586
LFDAPEAPLPSR	MTOR	001_MSC343_PRM_D23.raw	4099983	214292742144	1.91326e-05	WJ112-14-Me	0	0.986	1.05651
LFDAPEAPLPSR	MTOR	002_MSC343_PRM_D23.raw	3272951	193378598912	1.69251e-05	WJ112-14-Me	0	0.9784	0.934605
LFDAPEAPLPSR	MTOR	003_MSC343_PRM_D23.raw	3287878	179957153792	1.82703e-05	WJ112-14-Me	0	0.9808	1.00889
LFDAPEAPLPSR	MTOR	004_MSC343_PRM_D23.raw	4716245	275999817728	1.70879e-05	WJ112-14-Me	10000	0.981	0.943593
LFDAPEAPLPSR	MTOR	005_MSC343_PRM_D23.raw	4275533	255706333184	1.67205e-05	WJ112-14-Me	10000	0.9829	0.923306
LFDAPEAPLPSR	MTOR	006_MSC343_PRM_D23.raw	2404209	163584475136	1.4697e-05	WJ112-14-Me	10000	0.9797	0.811572
LFDAPEAPLPSR	MTOR	007_MSC343_PRM_D23.raw	4141562	241855430656	1.71241e-05	WJ112-14-Me	1000	0.9843	0.945595
LFDAPEAPLPSR	MTOR	008_MSC343_PRM_D23.raw	3669440	238651277312	1.53757e-05	WJ112-14-Me	1000	0.976	0.84905
LFDAPEAPLPSR	MTOR	009_MSC343_PRM_D23.raw	3827815	239189868544	1.60032e-05	WJ112-14-Me	1000	0.9811	0.883701
LFDAPEAPLPSR	MTOR	010_MSC343_PRM_D23.raw	4460333	272763600896	1.63524e-05	WJ112-14-Me	100	0.9858	0.90298
LFDAPEAPLPSR	MTOR	011_MSC343_PRM_D23.raw	3781616	278218309632	1.35923e-05	WJ112-14-Me	100	0.9836	0.750566
LFDAPEAPLPSR	MTOR	012_MSC343_PRM_D23.raw	3248356	196327243776	1.65456e-05	WJ112-14-Me	100	0.9799	0.913651
LFDAPEAPLPSR	MTOR	013_MSC343_PRM_D23.raw	4982724	295330185216	1.68717e-05	WJ112-14-Me	10	0.9703	0.931657
LFDAPEAPLPSR	MTOR	014_MSC343_PRM_D23.raw	4386913	256729694208	1.70877e-05	WJ112-14-Me	10	0.9721	0.943583
LFDAPEAPLPSR	MTOR	015_MSC343_PRM_D23.raw	4629015	285127507968	1.62349e-05	WJ112-14-Me	10	0.9873	0.896492
LFDAPEAPLPSR	MTOR	016_MSC343_PRM_D23.raw	5845228	280733253632	2.08213e-05	WJ112-14-Me	1	0.9786	1.14975
LFDAPEAPLPSR	MTOR	017_MSC343_PRM_D23.raw	3910796	225606402048	1.73346e-05	WJ112-14-Me	1	0.9798	0.957218
LFDAPEAPLPSR	MTOR	018_MSC343_PRM_D23.raw	4586187	381490724864	1.20218e-05	WJ112-14-Me	1	0.9722	0.663842
LFDAPEAPLPSR	MTOR	019_MSC343_PRM_D23.raw	4713822	357246304256	1.31949e-05	WJ112-14-Me	0.1	0.9859	0.728622
LFDAPEAPLPSR	MTOR	020_MSC343_PRM_D23.raw	5296382	318857150464	1.66105e-05	WJ112-14-Me	0.1	0.9777	0.917234
LFDAPEAPLPSR	MTOR	021_MSC343_PRM_D23.raw	4427326	369448976384	1.19836e-05	WJ112-14-Me	0.1	0.9859	0.661735
TLDQSPELR	MTOR	001_MSC343_PRM_D23.raw	3453983	214292742144	1.61181e-05	WJ112-14-Me	0	0.9864	0.98519
TLDQSPELR	MTOR	002_MSC343_PRM_D23.raw	3291241	193378598912	1.70197e-05	WJ112-14-Me	0	0.9771	1.0403
TLDQSPELR	MTOR	003_MSC343_PRM_D23.raw	2869114	179957153792	1.59433e-05	WJ112-14-Me	0	0.9838	0.97451
TLDQSPELR	MTOR	004_MSC343_PRM_D23.raw	3618691	275999817728	1.31112e-05	WJ112-14-Me	10000	0.9777	0.801401
TLDQSPELR	MTOR	005_MSC343_PRM_D23.raw	3308666	255706333184	1.29393e-05	WJ112-14-Me	10000	0.9764	0.790895
TLDQSPELR	MTOR	006_MSC343_PRM_D23.raw	2305435	163584475136	1.40932e-05	WJ112-14-Me	10000	0.9728	0.861426
TLDQSPELR	MTOR	007_MSC343_PRM_D23.raw	2810689	241855430656	1.16214e-05	WJ112-14-Me	1000	0.9862	0.710337
TLDQSPELR	MTOR	008_MSC343_PRM_D23.raw	2636287	238651277312	1.10466e-05	WJ112-14-Me	1000	0.9827	0.675206
TLDQSPELR	MTOR	009_MSC343_PRM_D23.raw	2891423	239189868544	1.20884e-05	WJ112-14-Me	1000	0.9691	0.738884
TLDQSPELR	MTOR	010_MSC343_PRM_D23.raw	3363135	272763600896	1.23299e-05	WJ112-14-Me	100	0.9706	0.753642
TLDQSPELR	MTOR	011_MSC343_PRM_D23.raw	2899664	278218309632	1.04223e-05	WJ112-14-Me	100	0.9718	0.637044
TLDQSPELR	MTOR	012_MSC343_PRM_D23.raw	2579695	196327243776	1.31398e-05	WJ112-14-Me	100	0.9812	0.803147
TLDQSPELR	MTOR	013_MSC343_PRM_D23.raw	3985201	295330185216	1.34941e-05	WJ112-14-Me	10	0.9702	0.824802
TLDQSPELR	MTOR	014_MSC343_PRM_D23.raw	3162032	256729694208	1.23166e-05	WJ112-14-Me	10	0.9675	0.752831
TLDQSPELR	MTOR	015_MSC343_PRM_D23.raw	3227180	285127507968	1.13184e-05	WJ112-14-Me	10	0.9709	0.691817
TLDQSPELR	MTOR	016_MSC343_PRM_D23.raw	2770968	280733253632	9.87047e-06	WJ112-14-Me	1	0.9545	0.603316
TLDQSPELR	MTOR	017_MSC343_PRM_D23.raw	3291967	225606402048	1.45916e-05	WJ112-14-Me	1	0.9738	0.89189
TLDQSPELR	MTOR	018_MSC343_PRM_D23.raw	3570214	381490724864	9.35859e-06	WJ112-14-Me	1	0.9698	0.572028
TLDQSPELR	MTOR	019_MSC343_PRM_D23.raw	3508457	357246304256	9.82083e-06	WJ112-14-Me	0.1	0.9784	0.600283
TLDQSPELR	MTOR	020_MSC343_PRM_D23.raw	4858383	318857150464	1.52369e-05	WJ112-14-Me	0.1	0.9642	0.931329
TLDQSPELR	MTOR	021_MSC343_PRM_D23.raw	4443657	369448976384	1.20278e-05	WJ112-14-Me	0.1	0.9623	0.73518
YHPQALIYPLTVASK	MTOR	001_MSC343_PRM_D23.raw	935609	214292742144	4.36603e-06	WJ112-14-Me	0	0.9429	1.11164
YHPQALIYPLTVASK	MTOR	002_MSC343_PRM_D23.raw	628422	193378598912	3.2497e-06	WJ112-14-Me	0	0.8947	0.827408
YHPQALIYPLTVASK	MTOR	003_MSC343_PRM_D23.raw	749874	179957153792	4.16696e-06	WJ112-14-Me	0	0.9519	1.06095
YHPQALIYPLTVASK	MTOR	004_MSC343_PRM_D23.raw	955346	275999817728	3.4614e-06	WJ112-14-Me	10000	0.8978	0.88131
YHPQALIYPLTVASK	MTOR	005_MSC343_PRM_D23.raw	1145401	255706333184	4.47936e-06	WJ112-14-Me	10000	0.8133	1.14049
YHPQALIYPLTVASK	MTOR	006_MSC343_PRM_D23.raw	479088	163584475136	2.92869e-06	WJ112-14-Me	10000	0.9595	0.745676
YHPQALIYPLTVASK	MTOR	007_MSC343_PRM_D23.raw	38435	241855430656	1.58917e-07	WJ112-14-Me	1000	0.266	0.0404621
YHPQALIYPLTVASK	MTOR	008_MSC343_PRM_D23.raw	29543	238651277312	1.23792e-07	WJ112-14-Me	1000	0.2609	0.0315187
YHPQALIYPLTVASK	MTOR	009_MSC343_PRM_D23.raw	35571	239189868544	1.48714e-07	WJ112-14-Me	1000	0.2453	0.0378643
YHPQALIYPLTVASK	MTOR	010_MSC343_PRM_D23.raw	31639	272763600896	1.15994e-07	WJ112-14-Me	100	0.2602	0.0295334
YHPQALIYPLTVASK	MTOR	011_MSC343_PRM_D23.raw	39080	278218309632	1.40465e-07	WJ112-14-Me	100	0.2641	0.035764
YHPQALIYPLTVASK	MTOR	012_MSC343_PRM_D23.raw	52698	196327243776	2.68419e-07	WJ112-14-Me	100	0.2674	0.0683424
YHPQALIYPLTVASK	MTOR	013_MSC343_PRM_D23.raw	83346	295330185216	2.82213e-07	WJ112-14-Me	10	0.2674	0.0718545
YHPQALIYPLTVASK	MTOR	014_MSC343_PRM_D23.raw	60074	256729694208	2.33997e-07	WJ112-14-Me	10	0.2662	0.0595782
YHPQALIYPLTVASK	MTOR	015_MSC343_PRM_D23.raw	56676	285127507968	1.98774e-07	WJ112-14-Me	10	0.2672	0.0506101
YHPQALIYPLTVASK	MTOR	016_MSC343_PRM_D23.raw	37332	280733253632	1.3298e-07	WJ112-14-Me	1	0.2568	0.0338582
YHPQALIYPLTVASK	MTOR	017_MSC343_PRM_D23.raw	52613	225606402048	2.33207e-07	WJ112-14-Me	1	0.2626	0.059377
YHPQALIYPLTVASK	MTOR	018_MSC343_PRM_D23.raw	92458	381490724864	2.4236e-07	WJ112-14-Me	1	0.2674	0.0617074
YHPQALIYPLTVASK	MTOR	019_MSC343_PRM_D23.raw	50932	357246304256	1.42568e-07	WJ112-14-Me	0.1	0.2618	0.0362994
YHPQALIYPLTVASK	MTOR	020_MSC343_PRM_D23.raw	1043664	318857150464	3.27314e-06	WJ112-14-Me	0.1	0.8761	0.833377
YHPQALIYPLTVASK	MTOR	021_MSC343_PRM_D23.raw	11352	369448976384	3.07268e-08	WJ112-14-Me	0.1	0.3781	0.00782339
ETSFNQAYGR	MTOR	001_MSC343_PRM_D23.raw	1173846	214292742144	5.47777e-06	WJ112-14-Me	0	0.958	0.919562
ETSFNQAYGR	MTOR	002_MSC343_PRM_D23.raw	1027332	193378598912	5.31254e-06	WJ112-14-Me	0	0.9318	0.891826
ETSFNQAYGR	MTOR	003_MSC343_PRM_D23.raw	1274183	179957153792	7.08048e-06	WJ112-14-Me	0	0.9407	1.18861
ETSFNQAYGR	MTOR	004_MSC343_PRM_D23.raw	1194695	275999817728	4.32861e-06	WJ112-14-Me	10000	0.9484	0.726651
ETSFNQAYGR	MTOR	005_MSC343_PRM_D23.raw	1259541	255706333184	4.92573e-06	WJ112-14-Me	10000	0.9613	0.826891
ETSFNQAYGR	MTOR	006_MSC343_PRM_D23.raw	842159	163584475136	5.14816e-06	WJ112-14-Me	10000	0.9495	0.86423
ETSFNQAYGR	MTOR	007_MSC343_PRM_D23.raw	1069327	241855430656	4.42135e-06	WJ112-14-Me	1000	0.9547	0.742219
ETSFNQAYGR	MTOR	008_MSC343_PRM_D23.raw	1091349	238651277312	4.57299e-06	WJ112-14-Me	1000	0.9441	0.767675
ETSFNQAYGR	MTOR	009_MSC343_PRM_D23.raw	1108965	239189868544	4.63634e-06	WJ112-14-Me	1000	0.9561	0.77831
ETSFNQAYGR	MTOR	010_MSC343_PRM_D23.raw	1319137	272763600896	4.83619e-06	WJ112-14-Me	100	0.9517	0.81186
ETSFNQAYGR	MTOR	011_MSC343_PRM_D23.raw	979272	278218309632	3.5198e-06	WJ112-14-Me	100	0.9485	0.590874
ETSFNQAYGR	MTOR	012_MSC343_PRM_D23.raw	945854	196327243776	4.81774e-06	WJ112-14-Me	100	0.9578	0.808763
ETSFNQAYGR	MTOR	013_MSC343_PRM_D23.raw	1510749	295330185216	5.11546e-06	WJ112-14-Me	10	0.9575	0.858741
ETSFNQAYGR	MTOR	014_MSC343_PRM_D23.raw	1209833	256729694208	4.71248e-06	WJ112-14-Me	10	0.9606	0.791092
ETSFNQAYGR	MTOR	015_MSC343_PRM_D23.raw	1310689	285127507968	4.59685e-06	WJ112-14-Me	10	0.9618	0.771681
ETSFNQAYGR	MTOR	016_MSC343_PRM_D23.raw	1300821	280733253632	4.63365e-06	WJ112-14-Me	1	0.9216	0.77786
ETSFNQAYGR	MTOR	017_MSC343_PRM_D23.raw	1129150	225606402048	5.00496e-06	WJ112-14-Me	1	0.9365	0.84019
ETSFNQAYGR	MTOR	018_MSC343_PRM_D23.raw	1447619	381490724864	3.79464e-06	WJ112-14-Me	1	0.9305	0.637012
ETSFNQAYGR	MTOR	019_MSC343_PRM_D23.raw	1477690	357246304256	4.13633e-06	WJ112-14-Me	0.1	0.9439	0.694373
ETSFNQAYGR	MTOR	020_MSC343_PRM_D23.raw	1708029	318857150464	5.35672e-06	WJ112-14-Me	0.1	0.9197	0.899242
ETSFNQAYGR	MTOR	021_MSC343_PRM_D23.raw	1481880	369448976384	4.01105e-06	WJ112-14-Me	0.1	0.9544	0.673343
DLELAVPGTYDPNQPIIR	MTOR	001_MSC343_PRM_D23.raw	1736643	214292742144	8.10407e-06	WJ112-14-Me	0	0.9554	0.855413
DLELAVPGTYDPNQPIIR	MTOR	002_MSC343_PRM_D23.raw	1769594	193378598912	9.15093e-06	WJ112-14-Me	0	0.9578	0.965913
DLELAVPGTYDPNQPIIR	MTOR	003_MSC343_PRM_D23.raw	2009510	179957153792	1.11666e-05	WJ112-14-Me	0	0.9623	1.17867
DLELAVPGTYDPNQPIIR	MTOR	004_MSC343_PRM_D23.raw	2065338	275999817728	7.48311e-06	WJ112-14-Me	10000	0.9601	0.789869
DLELAVPGTYDPNQPIIR	MTOR	005_MSC343_PRM_D23.raw	1685126	255706333184	6.59008e-06	WJ112-14-Me	10000	0.9668	0.695606
DLELAVPGTYDPNQPIIR	MTOR	006_MSC343_PRM_D23.raw	1239230	163584475136	7.57547e-06	WJ112-14-Me	10000	0.9604	0.799618
DLELAVPGTYDPNQPIIR	MTOR	007_MSC343_PRM_D23.raw	1739931	241855430656	7.1941e-06	WJ112-14-Me	1000	0.9591	0.759362
DLELAVPGTYDPNQPIIR	MTOR	008_MSC343_PRM_D23.raw	1596567	238651277312	6.68996e-06	WJ112-14-Me	1000	0.9619	0.706149
DLELAVPGTYDPNQPIIR	MTOR	009_MSC343_PRM_D23.raw	1963834	239189868544	8.21036e-06	WJ112-14-Me	1000	0.9596	0.866632
DLELAVPGTYDPNQPIIR	MTOR	010_MSC343_PRM_D23.raw	2028090	272763600896	7.43534e-06	WJ112-14-Me	100	0.9675	0.784826
DLELAVPGTYDPNQPIIR	MTOR	011_MSC343_PRM_D23.raw	1707598	278218309632	6.13762e-06	WJ112-14-Me	100	0.9649	0.647847
DLELAVPGTYDPNQPIIR	MTOR	012_MSC343_PRM_D23.raw	1658316	196327243776	8.44669e-06	WJ112-14-Me	100	0.965	0.891578
DLELAVPGTYDPNQPIIR	MTOR	013_MSC343_PRM_D23.raw	1972584	295330185216	6.67925e-06	WJ112-14-Me	10	0.98	0.705018
DLELAVPGTYDPNQPIIR	MTOR	014_MSC343_PRM_D23.raw	1858650	256729694208	7.23972e-06	WJ112-14-Me	10	0.9592	0.764177
DLELAVPGTYDPNQPIIR	MTOR	015_MSC343_PRM_D23.raw	1784616	285127507968	6.25901e-06	WJ112-14-Me	10	0.9565	0.660661
DLELAVPGTYDPNQPIIR	MTOR	016_MSC343_PRM_D23.raw	1157330	280733253632	4.12253e-06	WJ112-14-Me	1	0.9382	0.435147
DLELAVPGTYDPNQPIIR	MTOR	017_MSC343_PRM_D23.raw	1649004	225606402048	7.30921e-06	WJ112-14-Me	1	0.9483	0.771513
DLELAVPGTYDPNQPIIR	MTOR	018_MSC343_PRM_D23.raw	1901106	381490724864	4.98336e-06	WJ112-14-Me	1	0.9692	0.526011
DLELAVPGTYDPNQPIIR	MTOR	019_MSC343_PRM_D23.raw	1927848	357246304256	5.39641e-06	WJ112-14-Me	0.1	0.9744	0.56961
DLELAVPGTYDPNQPIIR	MTOR	020_MSC343_PRM_D23.raw	2661956	318857150464	8.34843e-06	WJ112-14-Me	0.1	0.9678	0.881206
DLELAVPGTYDPNQPIIR	MTOR	021_MSC343_PRM_D23.raw	2187796	369448976384	5.92178e-06	WJ112-14-Me	0.1	0.9709	0.625065
LFDAPEAPLPSR	MTOR	001_MSC265_PRM_D22.raw	4499774	329739000000	1.36465e-05	WJ112-14	0	0.9872	1.04774
LFDAPEAPLPSR	MTOR	002_MSC265_PRM_D22.raw	4376638	346081000000	1.26463e-05	WJ112-14	0	0.985	0.970944
LFDAPEAPLPSR	MTOR	003_MSC265_PRM_D22.raw	4091058	320078000000	1.27814e-05	WJ112-14	0	0.977	0.981321
LFDAPEAPLPSR	MTOR	004_MSC265_PRM_D22.raw	3985971	321442000000	1.24003e-05	WJ112-14	10000	0.9816	0.952057
LFDAPEAPLPSR	MTOR	005_MSC265_PRM_D22.raw	3737050	316740000000	1.17985e-05	WJ112-14	10000	0.9831	0.905852
LFDAPEAPLPSR	MTOR	006_MSC265_PRM_D22.raw	4071510	352840000000	1.15393e-05	WJ112-14	10000	0.9799	0.885949
LFDAPEAPLPSR	MTOR	007_MSC265_PRM_D22.raw	4404949	354163000000	1.24376e-05	WJ112-14	1000	0.9719	0.954924
LFDAPEAPLPSR	MTOR	008_MSC265_PRM_D22.raw	4457104	394599000000	1.12953e-05	WJ112-14	1000	0.985	0.867217
LFDAPEAPLPSR	MTOR	009_MSC265_PRM_20221129140155_D22.raw	4242224	343889000000	1.2336e-05	WJ112-14	1000	0.9844	0.947123
LFDAPEAPLPSR	MTOR	010_MSC265_PRM_D22.raw	4484027	390091000000	1.14948e-05	WJ112-14	100	0.9858	0.882538
LFDAPEAPLPSR	MTOR	011_MSC265_PRM_D22.raw	3947913	351022000000	1.12469e-05	WJ112-14	100	0.9858	0.863504
LFDAPEAPLPSR	MTOR	012_MSC265_PRM_D22.raw	4221413	363676000000	1.16076e-05	WJ112-14	100	0.9785	0.891198
LFDAPEAPLPSR	MTOR	013_MSC265_PRM_D22.raw	4395935	382997000000	1.14777e-05	WJ112-14	10	0.9822	0.881226
LFDAPEAPLPSR	MTOR	014_MSC265_PRM_D22.raw	4154124	393147000000	1.05663e-05	WJ112-14	10	0.9823	0.811252
LFDAPEAPLPSR	MTOR	015_MSC265_PRM_D22.raw	4830102	389705000000	1.23943e-05	WJ112-14	10	0.9791	0.951594
LFDAPEAPLPSR	MTOR	016_MSC265_PRM_D22.raw	3413481	352813000000	9.67504e-06	WJ112-14	1	0.9772	0.742821
LFDAPEAPLPSR	MTOR	017_MSC265_PRM_D22.raw	4671661	391611000000	1.19293e-05	WJ112-14	1	0.9809	0.915899
LFDAPEAPLPSR	MTOR	018_MSC265_PRM_D22.raw	4435714	402983000000	1.10072e-05	WJ112-14	1	0.9846	0.8451
LFDAPEAPLPSR	MTOR	019_MSC265_PRM_D22.raw	4742457	368870000000	1.28567e-05	WJ112-14	0.1	0.9839	0.9871
LFDAPEAPLPSR	MTOR	020_MSC265_PRM_D22.raw	4465526	388246000000	1.15018e-05	WJ112-14	0.1	0.9795	0.883073
LFDAPEAPLPSR	MTOR	021_MSC265_PRM_D22.raw	3862431	378765000000	1.01974e-05	WJ112-14	0.1	0.9851	0.782929
TLDQSPELR	MTOR	001_MSC265_PRM_D22.raw	3035970	329739000000	9.20719e-06	WJ112-14	0	0.9728	1.01732
TLDQSPELR	MTOR	002_MSC265_PRM_D22.raw	2809937	346081000000	8.1193e-06	WJ112-14	0	0.9741	0.897113
TLDQSPELR	MTOR	003_MSC265_PRM_D22.raw	3144750	320078000000	9.82495e-06	WJ112-14	0	0.9785	1.08557
TLDQSPELR	MTOR	004_MSC265_PRM_D22.raw	2680654	321442000000	8.33946e-06	WJ112-14	10000	0.9728	0.921439
TLDQSPELR	MTOR	005_MSC265_PRM_D22.raw	2706285	316740000000	8.54418e-06	WJ112-14	10000	0.9712	0.944059
TLDQSPELR	MTOR	006_MSC265_PRM_D22.raw	2739568	352840000000	7.76434e-06	WJ112-14	10000	0.974	0.857892
TLDQSPELR	MTOR	007_MSC265_PRM_D22.raw	2583625	354163000000	7.29502e-06	WJ112-14	1000	0.9753	0.806036
TLDQSPELR	MTOR	008_MSC265_PRM_D22.raw	2908026	394599000000	7.36957e-06	WJ112-14	1000	0.9692	0.814274
TLDQSPELR	MTOR	009_MSC265_PRM_20221129140155_D22.raw	2671239	343889000000	7.76774e-06	WJ112-14	1000	0.9832	0.858268
TLDQSPELR	MTOR	010_MSC265_PRM_D22.raw	3127065	390091000000	8.01624e-06	WJ112-14	100	0.9832	0.885726
TLDQSPELR	MTOR	011_MSC265_PRM_D22.raw	2980333	351022000000	8.49045e-06	WJ112-14	100	0.9744	0.938121
TLDQSPELR	MTOR	012_MSC265_PRM_D22.raw	2755376	363676000000	7.57646e-06	WJ112-14	100	0.9862	0.837133
TLDQSPELR	MTOR	013_MSC265_PRM_D22.raw	2766422	382997000000	7.22309e-06	WJ112-14	10	0.9809	0.798089
TLDQSPELR	MTOR	014_MSC265_PRM_D22.raw	3774248	393147000000	9.60009e-06	WJ112-14	10	0.9783	1.06073
TLDQSPELR	MTOR	015_MSC265_PRM_D22.raw	2972779	389705000000	7.62828e-06	WJ112-14	10	0.9733	0.842859
TLDQSPELR	MTOR	016_MSC265_PRM_D22.raw	2935442	352813000000	8.32011e-06	WJ112-14	1	0.9824	0.9193
TLDQSPELR	MTOR	017_MSC265_PRM_D22.raw	3352172	391611000000	8.55995e-06	WJ112-14	1	0.9791	0.945801
TLDQSPELR	MTOR	018_MSC265_PRM_D22.raw	3010005	402983000000	7.46931e-06	WJ112-14	1	0.9822	0.825294
TLDQSPELR	MTOR	019_MSC265_PRM_D22.raw	2829903	368870000000	7.67182e-06	WJ112-14	0.1	0.9692	0.847669
TLDQSPELR	MTOR	020_MSC265_PRM_D22.raw	3022441	388246000000	7.78486e-06	WJ112-14	0.1	0.9695	0.86016
TLDQSPELR	MTOR	021_MSC265_PRM_D22.raw	2911701	378765000000	7.68735e-06	WJ112-14	0.1	0.9761	0.849386
YHPQALIYPLTVASK	MTOR	001_MSC265_PRM_D22.raw	656401	329739000000	1.99067e-06	WJ112-14	0	0.7612	0.990056
YHPQALIYPLTVASK	MTOR	002_MSC265_PRM_D22.raw	654758	346081000000	1.89192e-06	WJ112-14	0	0.8934	0.940945
YHPQALIYPLTVASK	MTOR	003_MSC265_PRM_D22.raw	687974	320078000000	2.14939e-06	WJ112-14	0	0.9067	1.069
YHPQALIYPLTVASK	MTOR	004_MSC265_PRM_D22.raw	566354	321442000000	1.76192e-06	WJ112-14	10000	0.9061	0.876287
YHPQALIYPLTVASK	MTOR	005_MSC265_PRM_D22.raw	558546	316740000000	1.76342e-06	WJ112-14	10000	0.9714	0.877035
YHPQALIYPLTVASK	MTOR	006_MSC265_PRM_D22.raw	501286	352840000000	1.42072e-06	WJ112-14	10000	0.7926	0.706592
YHPQALIYPLTVASK	MTOR	007_MSC265_PRM_D22.raw	609291	354163000000	1.72037e-06	WJ112-14	1000	0.8756	0.855623
YHPQALIYPLTVASK	MTOR	008_MSC265_PRM_D22.raw	582665	394599000000	1.4766e-06	WJ112-14	1000	0.8654	0.734385
YHPQALIYPLTVASK	MTOR	009_MSC265_PRM_20221129140155_D22.raw	542725	343889000000	1.5782e-06	WJ112-14	1000	0.6419	0.784915
YHPQALIYPLTVASK	MTOR	010_MSC265_PRM_D22.raw	513505	390091000000	1.31637e-06	WJ112-14	100	0.6489	0.654696
YHPQALIYPLTVASK	MTOR	011_MSC265_PRM_D22.raw	608500	351022000000	1.73351e-06	WJ112-14	100	0.6284	0.862159
YHPQALIYPLTVASK	MTOR	012_MSC265_PRM_D22.raw	493628	363676000000	1.35733e-06	WJ112-14	100	0.5436	0.675066
YHPQALIYPLTVASK	MTOR	013_MSC265_PRM_D22.raw	578714	382997000000	1.51101e-06	WJ112-14	10	0.4645	0.751501
YHPQALIYPLTVASK	MTOR	014_MSC265_PRM_D22.raw	376532	393147000000	9.57738e-07	WJ112-14	10	0.4772	0.47633
YHPQALIYPLTVASK	MTOR	015_MSC265_PRM_D22.raw	780473	389705000000	2.00273e-06	WJ112-14	10	0.5721	0.996054
YHPQALIYPLTVASK	MTOR	016_MSC265_PRM_D22.raw	572290	352813000000	1.62208e-06	WJ112-14	1	0.5407	0.806738
YHPQALIYPLTVASK	MTOR	017_MSC265_PRM_D22.raw	565097	391611000000	1.44301e-06	WJ112-14	1	0.4645	0.717677
YHPQALIYPLTVASK	MTOR	018_MSC265_PRM_D22.raw	417830	402983000000	1.03684e-06	WJ112-14	1	0.4868	0.515672
YHPQALIYPLTVASK	MTOR	019_MSC265_PRM_D22.raw	606337	368870000000	1.64377e-06	WJ112-14	0.1	0.5683	0.817526
YHPQALIYPLTVASK	MTOR	020_MSC265_PRM_D22.raw	388160	388246000000	9.99778e-07	WJ112-14	0.1	0.4835	0.497239
YHPQALIYPLTVASK	MTOR	021_MSC265_PRM_D22.raw	379508	378765000000	1.00196e-06	WJ112-14	0.1	0.4787	0.498324
ETSFNQAYGR	MTOR	001_MSC265_PRM_D22.raw	1490359	329739000000	4.51981e-06	WJ112-14	0	0.9518	0.983355
ETSFNQAYGR	MTOR	002_MSC265_PRM_D22.raw	1599614	346081000000	4.62208e-06	WJ112-14	0	0.9574	1.0056
ETSFNQAYGR	MTOR	003_MSC265_PRM_D22.raw	1487424	320078000000	4.64707e-06	WJ112-14	0	0.9393	1.01104
ETSFNQAYGR	MTOR	004_MSC265_PRM_D22.raw	1537919	321442000000	4.78444e-06	WJ112-14	10000	0.9449	1.04093
ETSFNQAYGR	MTOR	005_MSC265_PRM_D22.raw	1485129	316740000000	4.6888e-06	WJ112-14	10000	0.9532	1.02012
ETSFNQAYGR	MTOR	006_MSC265_PRM_D22.raw	1421647	352840000000	4.02915e-06	WJ112-14	10000	0.9405	0.876604
ETSFNQAYGR	MTOR	007_MSC265_PRM_D22.raw	1460953	354163000000	4.12509e-06	WJ112-14	1000	0.9321	0.897476
ETSFNQAYGR	MTOR	008_MSC265_PRM_D22.raw	1494392	394599000000	3.78712e-06	WJ112-14	1000	0.9421	0.823945
ETSFNQAYGR	MTOR	009_MSC265_PRM_20221129140155_D22.raw	1366078	343889000000	3.97244e-06	WJ112-14	1000	0.9403	0.864265
ETSFNQAYGR	MTOR	010_MSC265_PRM_D22.raw	1560650	390091000000	4.00073e-06	WJ112-14	100	0.944	0.870421
ETSFNQAYGR	MTOR	011_MSC265_PRM_D22.raw	1813143	351022000000	5.16533e-06	WJ112-14	100	0.9496	1.1238
ETSFNQAYGR	MTOR	012_MSC265_PRM_D22.raw	1681321	363676000000	4.62313e-06	WJ112-14	100	0.9503	1.00583
ETSFNQAYGR	MTOR	013_MSC265_PRM_D22.raw	1736557	382997000000	4.53413e-06	WJ112-14	10	0.9413	0.986469
ETSFNQAYGR	MTOR	014_MSC265_PRM_D22.raw	1718871	393147000000	4.37208e-06	WJ112-14	10	0.9258	0.951214
ETSFNQAYGR	MTOR	015_MSC265_PRM_D22.raw	1620301	389705000000	4.15776e-06	WJ112-14	10	0.943	0.904585
ETSFNQAYGR	MTOR	016_MSC265_PRM_D22.raw	1497363	352813000000	4.24407e-06	WJ112-14	1	0.9455	0.923362
ETSFNQAYGR	MTOR	017_MSC265_PRM_D22.raw	1976231	391611000000	5.04641e-06	WJ112-14	1	0.9402	1.09792
ETSFNQAYGR	MTOR	018_MSC265_PRM_D22.raw	1661331	402983000000	4.12258e-06	WJ112-14	1	0.9466	0.896931
ETSFNQAYGR	MTOR	019_MSC265_PRM_D22.raw	1459010	368870000000	3.95535e-06	WJ112-14	0.1	0.9533	0.860547
ETSFNQAYGR	MTOR	020_MSC265_PRM_D22.raw	1548506	388246000000	3.98847e-06	WJ112-14	0.1	0.9396	0.867752
ETSFNQAYGR	MTOR	021_MSC265_PRM_D22.raw	1662241	378765000000	4.38858e-06	WJ112-14	0.1	0.9332	0.954803
DLELAVPGTYDPNQPIIR	MTOR	001_MSC265_PRM_D22.raw	1420441	329739000000	4.30777e-06	WJ112-14	0	0.9708	0.96368
DLELAVPGTYDPNQPIIR	MTOR	002_MSC265_PRM_D22.raw	1481256	346081000000	4.28008e-06	WJ112-14	0	0.9874	0.957485
DLELAVPGTYDPNQPIIR	MTOR	003_MSC265_PRM_D22.raw	1543587	320078000000	4.82253e-06	WJ112-14	0	0.9781	1.07884
DLELAVPGTYDPNQPIIR	MTOR	004_MSC265_PRM_D22.raw	1413372	321442000000	4.39697e-06	WJ112-14	10000	0.9883	0.983634
DLELAVPGTYDPNQPIIR	MTOR	005_MSC265_PRM_D22.raw	1377370	316740000000	4.34858e-06	WJ112-14	10000	0.9719	0.972809
DLELAVPGTYDPNQPIIR	MTOR	006_MSC265_PRM_D22.raw	1416581	352840000000	4.0148e-06	WJ112-14	10000	0.9859	0.898139
DLELAVPGTYDPNQPIIR	MTOR	007_MSC265_PRM_D22.raw	1389851	354163000000	3.92433e-06	WJ112-14	1000	0.9621	0.8779
DLELAVPGTYDPNQPIIR	MTOR	008_MSC265_PRM_D22.raw	1753949	394599000000	4.44489e-06	WJ112-14	1000	0.984	0.994353
DLELAVPGTYDPNQPIIR	MTOR	009_MSC265_PRM_20221129140155_D22.raw	1658420	343889000000	4.82254e-06	WJ112-14	1000	0.9569	1.07884
DLELAVPGTYDPNQPIIR	MTOR	010_MSC265_PRM_D22.raw	1936163	390091000000	4.96336e-06	WJ112-14	100	0.9878	1.11034
DLELAVPGTYDPNQPIIR	MTOR	011_MSC265_PRM_D22.raw	1581298	351022000000	4.50484e-06	WJ112-14	100	0.9642	1.00776
DLELAVPGTYDPNQPIIR	MTOR	012_MSC265_PRM_D22.raw	1628366	363676000000	4.47752e-06	WJ112-14	100	0.9736	1.00165
DLELAVPGTYDPNQPIIR	MTOR	013_MSC265_PRM_D22.raw	1764308	382997000000	4.60658e-06	WJ112-14	10	0.9733	1.03053
DLELAVPGTYDPNQPIIR	MTOR	014_MSC265_PRM_D22.raw	1914759	393147000000	4.87034e-06	WJ112-14	10	0.9813	1.08953
DLELAVPGTYDPNQPIIR	MTOR	015_MSC265_PRM_D22.raw	1916352	389705000000	4.91744e-06	WJ112-14	10	0.9738	1.10007
DLELAVPGTYDPNQPIIR	MTOR	016_MSC265_PRM_D22.raw	1299026	352813000000	3.68191e-06	WJ112-14	1	0.9718	0.82367
DLELAVPGTYDPNQPIIR	MTOR	017_MSC265_PRM_D22.raw	1951185	391611000000	4.98246e-06	WJ112-14	1	0.9773	1.11461
DLELAVPGTYDPNQPIIR	MTOR	018_MSC265_PRM_D22.raw	1809736	402983000000	4.49085e-06	WJ112-14	1	0.9821	1.00463
DLELAVPGTYDPNQPIIR	MTOR	019_MSC265_PRM_D22.raw	1436674	368870000000	3.8948e-06	WJ112-14	0.1	0.9691	0.871294
DLELAVPGTYDPNQPIIR	MTOR	020_MSC265_PRM_D22.raw	1698312	388246000000	4.37432e-06	WJ112-14	0.1	0.9758	0.978566
DLELAVPGTYDPNQPIIR	MTOR	021_MSC265_PRM_D22.raw	1494983	378765000000	3.94699e-06	WJ112-14	0.1	0.9666	0.88297
LFDAPEAPLPSR	MTOR	001_MSC351_PRM_rr_D23.raw	2744282	145432166400	1.88698e-05	WJ111-11	0	0.9769	0.985917
LFDAPEAPLPSR	MTOR	002_MSC351_PRM_rr_D23.raw	2544099	142938210304	1.77986e-05	WJ111-11	0	0.9769	0.929946
LFDAPEAPLPSR	MTOR	003_MSC351_PRM_rr_D23.raw	3840811	185102123008	2.07497e-05	WJ111-11	0	0.984	1.08414
LFDAPEAPLPSR	MTOR	004_MSC351_PRM_rr_D23.raw	3071463	158505664512	1.93776e-05	WJ111-11	1000	0.9828	1.01245
LFDAPEAPLPSR	MTOR	005_MSC351_PRM_rr_D23.raw	2265411	146453659648	1.54684e-05	WJ111-11	1000	0.9719	0.8082
LFDAPEAPLPSR	MTOR	006_MSC351_PRM_rr_D23.raw	4817426	242047172608	1.99028e-05	WJ111-11	1000	0.9776	1.03989
LFDAPEAPLPSR	MTOR	007_MSC351_PRM_rr_D23.raw	3183355	186696499200	1.7051e-05	WJ111-11	100	0.9742	0.890884
LFDAPEAPLPSR	MTOR	008_MSC351_PRM_rr_D23.raw	0	29022181376	0	WJ111-11	100	0	0
LFDAPEAPLPSR	MTOR	009_MSC351_PRM_rr_D23.raw	3597458	181033205760	1.98718e-05	WJ111-11	100	0.9755	1.03827
LFDAPEAPLPSR	MTOR	010_MSC351_PRM_rr_D23.raw	3287828	197857722368	1.66171e-05	WJ111-11	10	0.9792	0.868217
LFDAPEAPLPSR	MTOR	011_MSC351_PRM_rr_D23.raw	4199499	214832152576	1.95478e-05	WJ111-11	10	0.9809	1.02134
LFDAPEAPLPSR	MTOR	012_MSC351_PRM_rr_D23.raw	3383385	174822834176	1.93532e-05	WJ111-11	10	0.9846	1.01117
LFDAPEAPLPSR	MTOR	013_MSC351_PRM_rr_D23.raw	4787810	213373452288	2.24386e-05	WJ111-11	1	0.9826	1.17238
LFDAPEAPLPSR	MTOR	014_MSC351_PRM_rr_D23.raw	3694435	217729466368	1.6968e-05	WJ111-11	1	0.9794	0.88655
LFDAPEAPLPSR	MTOR	015_MSC351_PRM_rr_D23.raw	2952584	168418148352	1.75313e-05	WJ111-11	1	0.9746	0.915979
TLDQSPELR	MTOR	001_MSC351_PRM_rr_D23.raw	1674852	145432166400	1.15164e-05	WJ111-11	0	0.9959	1.03431
TLDQSPELR	MTOR	002_MSC351_PRM_rr_D23.raw	1776608	142938210304	1.24292e-05	WJ111-11	0	0.9768	1.11629
TLDQSPELR	MTOR	003_MSC351_PRM_rr_D23.raw	1750598	185102123008	9.45747e-06	WJ111-11	0	0.9855	0.849396
TLDQSPELR	MTOR	004_MSC351_PRM_rr_D23.raw	1914678	158505664512	1.20796e-05	WJ111-11	1000	0.9599	1.08489
TLDQSPELR	MTOR	005_MSC351_PRM_rr_D23.raw	1607296	146453659648	1.09748e-05	WJ111-11	1000	0.9825	0.985668
TLDQSPELR	MTOR	006_MSC351_PRM_rr_D23.raw	2632053	242047172608	1.08741e-05	WJ111-11	1000	0.9813	0.976629
TLDQSPELR	MTOR	007_MSC351_PRM_rr_D23.raw	1565680	186696499200	8.38623e-06	WJ111-11	100	0.9809	0.753185
TLDQSPELR	MTOR	008_MSC351_PRM_rr_D23.raw	0	29022181376	0	WJ111-11	100	0	0
TLDQSPELR	MTOR	009_MSC351_PRM_rr_D23.raw	2144855	181033205760	1.18479e-05	WJ111-11	100	0.9725	1.06408
TLDQSPELR	MTOR	010_MSC351_PRM_rr_D23.raw	2743023	197857722368	1.38636e-05	WJ111-11	10	0.9923	1.24512
TLDQSPELR	MTOR	011_MSC351_PRM_rr_D23.raw	2744717	214832152576	1.27761e-05	WJ111-11	10	0.9857	1.14745
TLDQSPELR	MTOR	012_MSC351_PRM_rr_D23.raw	2650529	174822834176	1.51612e-05	WJ111-11	10	0.9836	1.36166
TLDQSPELR	MTOR	013_MSC351_PRM_rr_D23.raw	3441499	213373452288	1.6129e-05	WJ111-11	1	0.9847	1.44858
TLDQSPELR	MTOR	014_MSC351_PRM_rr_D23.raw	2283939	217729466368	1.04898e-05	WJ111-11	1	0.981	0.942112
TLDQSPELR	MTOR	015_MSC351_PRM_rr_D23.raw	1782340	168418148352	1.05828e-05	WJ111-11	1	0.9788	0.950466
YHPQALIYPLTVASK	MTOR	001_MSC351_PRM_rr_D23.raw	749110	145432166400	5.15092e-06	WJ111-11	0	0.9783	0.826931
YHPQALIYPLTVASK	MTOR	002_MSC351_PRM_rr_D23.raw	977315	142938210304	6.83733e-06	WJ111-11	0	0.9865	1.09767
YHPQALIYPLTVASK	MTOR	003_MSC351_PRM_rr_D23.raw	1239933	185102123008	6.69864e-06	WJ111-11	0	0.9773	1.0754
YHPQALIYPLTVASK	MTOR	004_MSC351_PRM_rr_D23.raw	993073	158505664512	6.26522e-06	WJ111-11	1000	0.9868	1.00582
YHPQALIYPLTVASK	MTOR	005_MSC351_PRM_rr_D23.raw	697723	146453659648	4.76412e-06	WJ111-11	1000	0.9796	0.764834
YHPQALIYPLTVASK	MTOR	006_MSC351_PRM_rr_D23.raw	1049413	242047172608	4.33557e-06	WJ111-11	1000	0.9716	0.696034
YHPQALIYPLTVASK	MTOR	007_MSC351_PRM_rr_D23.raw	1149337	186696499200	6.15618e-06	WJ111-11	100	0.9728	0.988315
YHPQALIYPLTVASK	MTOR	008_MSC351_PRM_rr_D23.raw	0	29022181376	0	WJ111-11	100	0	0
YHPQALIYPLTVASK	MTOR	009_MSC351_PRM_rr_D23.raw	1142866	181033205760	6.31302e-06	WJ111-11	100	0.9792	1.01349
YHPQALIYPLTVASK	MTOR	010_MSC351_PRM_rr_D23.raw	1002167	197857722368	5.06509e-06	WJ111-11	10	0.9731	0.813151
YHPQALIYPLTVASK	MTOR	011_MSC351_PRM_rr_D23.raw	786554	214832152576	3.66125e-06	WJ111-11	10	0.9899	0.587778
YHPQALIYPLTVASK	MTOR	012_MSC351_PRM_rr_D23.raw	979736	174822834176	5.60416e-06	WJ111-11	10	0.9779	0.899695
YHPQALIYPLTVASK	MTOR	013_MSC351_PRM_rr_D23.raw	1210307	213373452288	5.67225e-06	WJ111-11	1	0.9809	0.910625
YHPQALIYPLTVASK	MTOR	014_MSC351_PRM_rr_D23.raw	847554	217729466368	3.89269e-06	WJ111-11	1	0.9697	0.624934
YHPQALIYPLTVASK	MTOR	015_MSC351_PRM_rr_D23.raw	930166	168418148352	5.52296e-06	WJ111-11	1	0.9782	0.886657
ETSFNQAYGR	MTOR	001_MSC351_PRM_rr_D23.raw	667054	145432166400	4.5867e-06	WJ111-11	0	0.9475	1.59634
ETSFNQAYGR	MTOR	002_MSC351_PRM_rr_D23.raw	280076	142938210304	1.95942e-06	WJ111-11	0	0.9417	0.68195
ETSFNQAYGR	MTOR	003_MSC351_PRM_rr_D23.raw	383838	185102123008	2.07366e-06	WJ111-11	0	0.9546	0.721708
ETSFNQAYGR	MTOR	004_MSC351_PRM_rr_D23.raw	516677	158505664512	3.25968e-06	WJ111-11	1000	0.9378	1.13449
ETSFNQAYGR	MTOR	005_MSC351_PRM_rr_D23.raw	628912	146453659648	4.29427e-06	WJ111-11	1000	0.9444	1.49457
ETSFNQAYGR	MTOR	006_MSC351_PRM_rr_D23.raw	615070	242047172608	2.54112e-06	WJ111-11	1000	0.9337	0.884402
ETSFNQAYGR	MTOR	007_MSC351_PRM_rr_D23.raw	875902	186696499200	4.69158e-06	WJ111-11	100	0.9347	1.63284
ETSFNQAYGR	MTOR	008_MSC351_PRM_rr_D23.raw	0	29022181376	0	WJ111-11	100	0	0
ETSFNQAYGR	MTOR	009_MSC351_PRM_rr_D23.raw	872064	181033205760	4.81715e-06	WJ111-11	100	0.9408	1.67655
ETSFNQAYGR	MTOR	010_MSC351_PRM_rr_D23.raw	1076254	197857722368	5.43953e-06	WJ111-11	10	0.9414	1.89316
ETSFNQAYGR	MTOR	011_MSC351_PRM_rr_D23.raw	1439860	214832152576	6.70226e-06	WJ111-11	10	0.9545	2.33263
ETSFNQAYGR	MTOR	012_MSC351_PRM_rr_D23.raw	858424	174822834176	4.91025e-06	WJ111-11	10	0.9321	1.70895
ETSFNQAYGR	MTOR	013_MSC351_PRM_rr_D23.raw	1528834	213373452288	7.16506e-06	WJ111-11	1	0.9427	2.49371
ETSFNQAYGR	MTOR	014_MSC351_PRM_rr_D23.raw	859888	217729466368	3.94934e-06	WJ111-11	1	0.9447	1.37452
ETSFNQAYGR	MTOR	015_MSC351_PRM_rr_D23.raw	783468	168418148352	4.65192e-06	WJ111-11	1	0.9382	1.61904
DLELAVPGTYDPNQPIIR	MTOR	001_MSC351_PRM_rr_D23.raw	629395	145432166400	4.32776e-06	WJ111-11	0	0.8834	0.714986
DLELAVPGTYDPNQPIIR	MTOR	002_MSC351_PRM_rr_D23.raw	1176682	142938210304	8.2321e-06	WJ111-11	0	0.9554	1.36002
DLELAVPGTYDPNQPIIR	MTOR	003_MSC351_PRM_rr_D23.raw	1036373	185102123008	5.59893e-06	WJ111-11	0	0.9606	0.924995
DLELAVPGTYDPNQPIIR	MTOR	004_MSC351_PRM_rr_D23.raw	756353	158505664512	4.77177e-06	WJ111-11	1000	0.9676	0.788341
DLELAVPGTYDPNQPIIR	MTOR	005_MSC351_PRM_rr_D23.raw	567269	146453659648	3.87337e-06	WJ111-11	1000	0.9498	0.639916
DLELAVPGTYDPNQPIIR	MTOR	006_MSC351_PRM_rr_D23.raw	1323719	242047172608	5.46885e-06	WJ111-11	1000	0.9822	0.903504
DLELAVPGTYDPNQPIIR	MTOR	007_MSC351_PRM_rr_D23.raw	713938	186696499200	3.82406e-06	WJ111-11	100	0.9543	0.63177
DLELAVPGTYDPNQPIIR	MTOR	008_MSC351_PRM_rr_D23.raw	0	29022181376	0	WJ111-11	100	0	0
DLELAVPGTYDPNQPIIR	MTOR	009_MSC351_PRM_rr_D23.raw	1026698	181033205760	5.67132e-06	WJ111-11	100	0.9564	0.936955
DLELAVPGTYDPNQPIIR	MTOR	010_MSC351_PRM_rr_D23.raw	1094892	197857722368	5.53373e-06	WJ111-11	10	0.9822	0.914224
DLELAVPGTYDPNQPIIR	MTOR	011_MSC351_PRM_rr_D23.raw	809887	214832152576	3.76986e-06	WJ111-11	10	0.9623	0.622816
DLELAVPGTYDPNQPIIR	MTOR	012_MSC351_PRM_rr_D23.raw	1186253	174822834176	6.78546e-06	WJ111-11	10	0.9537	1.12102
DLELAVPGTYDPNQPIIR	MTOR	013_MSC351_PRM_rr_D23.raw	1503224	213373452288	7.04504e-06	WJ111-11	1	0.9678	1.16391
DLELAVPGTYDPNQPIIR	MTOR	014_MSC351_PRM_rr_D23.raw	1093782	217729466368	5.02358e-06	WJ111-11	1	0.968	0.829943
DLELAVPGTYDPNQPIIR	MTOR	015_MSC351_PRM_rr_D23.raw	838714	168418148352	4.97995e-06	WJ111-11	1	0.9664	0.822734
LFDAPEAPLPSR	MTOR	001_MSC346_PRM_20230228172818_D23.raw	4027486	466340642816	8.63636e-06	Li_2018_D	0	0.9779	1.02658
LFDAPEAPLPSR	MTOR	002_MSC346_PRM_20230228191023_D23.raw	4908080	628807303168	7.80538e-06	Li_2018_D	0	0.9823	0.927805
LFDAPEAPLPSR	MTOR	003_MSC346_PRM_20230228205243_D23.raw	4444034	505206407168	8.79647e-06	Li_2018_D	0	0.9789	1.04561
LFDAPEAPLPSR	MTOR	004_MSC346_PRM_20230228231931_D23.raw	4756372	482381037568	9.8602e-06	Li_2018_D	10000	0.9773	1.17206
LFDAPEAPLPSR	MTOR	005_MSC346_PRM_20230301010203_D23.raw	4502565	511119654912	8.80922e-06	Li_2018_D	10000	0.978	1.04713
LFDAPEAPLPSR	MTOR	006_MSC346_PRM_20230301024419_D23.raw	4820770	709233672192	6.79715e-06	Li_2018_D	10000	0.974	0.80796
LFDAPEAPLPSR	MTOR	007_MSC346_PRM_20230301051107_D23.raw	5193182	582690537472	8.91242e-06	Li_2018_D	1000	0.9795	1.0594
LFDAPEAPLPSR	MTOR	008_MSC346_PRM_20230301065343_D23.raw	6289435	736397819904	8.54081e-06	Li_2018_D	1000	0.9826	1.01522
LFDAPEAPLPSR	MTOR	009_MSC346_PRM_20230301083619_D23.raw	5142339	680459042816	7.55716e-06	Li_2018_D	1000	0.9798	0.8983
LFDAPEAPLPSR	MTOR	010_MSC346_PRM_20230301110319_D23.raw	5175537	548949327872	9.42808e-06	Li_2018_D	100	0.9823	1.12069
LFDAPEAPLPSR	MTOR	011_MSC346_PRM_20230301124607_D23.raw	4077134	493777223680	8.25703e-06	Li_2018_D	100	0.9664	0.981492
LFDAPEAPLPSR	MTOR	012_MSC346_PRM_20230301142855_D23.raw	4598418	676670406656	6.79565e-06	Li_2018_D	100	0.9752	0.807782
LFDAPEAPLPSR	MTOR	013_MSC346_PRM_20230301165558_D23.raw	3667646	611439804416	5.99838e-06	Li_2018_D	10	0.9803	0.713011
LFDAPEAPLPSR	MTOR	014_MSC346_PRM_20230301183857_D23.raw	4034835	530941476864	7.5994e-06	Li_2018_D	10	0.9731	0.90332
LFDAPEAPLPSR	MTOR	015_MSC346_PRM_20230301202149_D23.raw	3478918	628439711744	5.5358e-06	Li_2018_D	10	0.9804	0.658026
LFDAPEAPLPSR	MTOR	016_MSC346_PRM_D23.raw	6264457	428286312448	1.46268e-05	Li_2018_D	1	0.988	1.73865
LFDAPEAPLPSR	MTOR	017_MSC346_PRM_D23.raw	5157992	613658066944	8.40532e-06	Li_2018_D	1	0.973	0.999118
LFDAPEAPLPSR	MTOR	018_MSC346_PRM_D23.raw	4410440	543936479232	8.10837e-06	Li_2018_D	1	0.9815	0.963821
LFDAPEAPLPSR	MTOR	019_MSC346_PRM_D23.raw	4430561	516732977152	8.57418e-06	Li_2018_D	0.1	0.9747	1.01919
LFDAPEAPLPSR	MTOR	020_MSC346_PRM_D23.raw	5069172	655402467328	7.73444e-06	Li_2018_D	0.1	0.9753	0.919373
LFDAPEAPLPSR	MTOR	021_MSC346_PRM_D23.raw	4913230	656497508352	7.484e-06	Li_2018_D	0.1	0.9794	0.889604
TLDQSPELR	MTOR	001_MSC346_PRM_20230228172818_D23.raw	5190846	466340642816	1.1131e-05	Li_2018_D	0	0.9666	1.05756
TLDQSPELR	MTOR	002_MSC346_PRM_20230228191023_D23.raw	4780869	628807303168	7.60307e-06	Li_2018_D	0	0.9399	0.722367
TLDQSPELR	MTOR	003_MSC346_PRM_20230228205243_D23.raw	6487649	505206407168	1.28416e-05	Li_2018_D	0	0.9617	1.22008
TLDQSPELR	MTOR	004_MSC346_PRM_20230228231931_D23.raw	7265994	482381037568	1.50628e-05	Li_2018_D	10000	0.9307	1.43111
TLDQSPELR	MTOR	005_MSC346_PRM_20230301010203_D23.raw	7838428	511119654912	1.53358e-05	Li_2018_D	10000	0.9821	1.45705
TLDQSPELR	MTOR	006_MSC346_PRM_20230301024419_D23.raw	7137275	709233672192	1.00634e-05	Li_2018_D	10000	0.9753	0.956118
TLDQSPELR	MTOR	007_MSC346_PRM_20230301051107_D23.raw	6910646	582690537472	1.18599e-05	Li_2018_D	1000	0.9752	1.12681
TLDQSPELR	MTOR	008_MSC346_PRM_20230301065343_D23.raw	8370312	736397819904	1.13666e-05	Li_2018_D	1000	0.9678	1.07994
TLDQSPELR	MTOR	009_MSC346_PRM_20230301083619_D23.raw	7167116	680459042816	1.05328e-05	Li_2018_D	1000	0.9834	1.00072
TLDQSPELR	MTOR	010_MSC346_PRM_20230301110319_D23.raw	8160562	548949327872	1.48658e-05	Li_2018_D	100	0.9713	1.4124
TLDQSPELR	MTOR	011_MSC346_PRM_20230301124607_D23.raw	6431760	493777223680	1.30256e-05	Li_2018_D	100	0.9599	1.23756
TLDQSPELR	MTOR	012_MSC346_PRM_20230301142855_D23.raw	6530346	676670406656	9.6507e-06	Li_2018_D	100	0.9715	0.916912
TLDQSPELR	MTOR	013_MSC346_PRM_20230301165558_D23.raw	5464102	611439804416	8.93645e-06	Li_2018_D	10	0.9927	0.849051
TLDQSPELR	MTOR	014_MSC346_PRM_20230301183857_D23.raw	5626037	530941476864	1.05963e-05	Li_2018_D	10	0.977	1.00676
TLDQSPELR	MTOR	015_MSC346_PRM_20230301202149_D23.raw	6609330	628439711744	1.0517e-05	Li_2018_D	10	0.9755	0.999223
TLDQSPELR	MTOR	016_MSC346_PRM_D23.raw	6071162	428286312448	1.41755e-05	Li_2018_D	1	0.9781	1.34681
TLDQSPELR	MTOR	017_MSC346_PRM_D23.raw	8817735	613658066944	1.43691e-05	Li_2018_D	1	0.9626	1.36521
TLDQSPELR	MTOR	018_MSC346_PRM_D23.raw	6506556	543936479232	1.1962e-05	Li_2018_D	1	0.9821	1.13651
TLDQSPELR	MTOR	019_MSC346_PRM_D23.raw	6538243	516732977152	1.2653e-05	Li_2018_D	0.1	0.9704	1.20216
TLDQSPELR	MTOR	020_MSC346_PRM_D23.raw	8906664	655402467328	1.35896e-05	Li_2018_D	0.1	0.9729	1.29115
TLDQSPELR	MTOR	021_MSC346_PRM_D23.raw	7165512	656497508352	1.09148e-05	Li_2018_D	0.1	0.9734	1.03701
YHPQALIYPLTVASK	MTOR	001_MSC346_PRM_20230228172818_D23.raw	1510306	466340642816	3.23863e-06	Li_2018_D	0	0.9699	0.981301
YHPQALIYPLTVASK	MTOR	002_MSC346_PRM_20230228191023_D23.raw	2029409	628807303168	3.22739e-06	Li_2018_D	0	0.966	0.977896
YHPQALIYPLTVASK	MTOR	003_MSC346_PRM_20230228205243_D23.raw	1735389	505206407168	3.43501e-06	Li_2018_D	0	0.9535	1.0408
YHPQALIYPLTVASK	MTOR	004_MSC346_PRM_20230228231931_D23.raw	1413511	482381037568	2.93028e-06	Li_2018_D	10000	0.9455	0.88787
YHPQALIYPLTVASK	MTOR	005_MSC346_PRM_20230301010203_D23.raw	1496085	511119654912	2.92707e-06	Li_2018_D	10000	0.9421	0.886899
YHPQALIYPLTVASK	MTOR	006_MSC346_PRM_20230301024419_D23.raw	1331829	709233672192	1.87784e-06	Li_2018_D	10000	0.9741	0.568984
YHPQALIYPLTVASK	MTOR	007_MSC346_PRM_20230301051107_D23.raw	1823544	582690537472	3.12952e-06	Li_2018_D	1000	0.9499	0.948241
YHPQALIYPLTVASK	MTOR	008_MSC346_PRM_20230301065343_D23.raw	1833152	736397819904	2.48935e-06	Li_2018_D	1000	0.9683	0.75427
YHPQALIYPLTVASK	MTOR	009_MSC346_PRM_20230301083619_D23.raw	1145729	680459042816	1.68376e-06	Li_2018_D	1000	0.9428	0.510177
YHPQALIYPLTVASK	MTOR	010_MSC346_PRM_20230301110319_D23.raw	1652097	548949327872	3.00956e-06	Li_2018_D	100	0.941	0.911893
YHPQALIYPLTVASK	MTOR	011_MSC346_PRM_20230301124607_D23.raw	1724533	493777223680	3.49253e-06	Li_2018_D	100	0.9605	1.05823
YHPQALIYPLTVASK	MTOR	012_MSC346_PRM_20230301142855_D23.raw	1406172	676670406656	2.07808e-06	Li_2018_D	100	0.9592	0.629654
YHPQALIYPLTVASK	MTOR	013_MSC346_PRM_20230301165558_D23.raw	1613413	611439804416	2.63871e-06	Li_2018_D	10	0.9773	0.799526
YHPQALIYPLTVASK	MTOR	014_MSC346_PRM_20230301183857_D23.raw	1259659	530941476864	2.3725e-06	Li_2018_D	10	0.9121	0.718864
YHPQALIYPLTVASK	MTOR	015_MSC346_PRM_20230301202149_D23.raw	1580171	628439711744	2.51444e-06	Li_2018_D	10	0.9708	0.76187
YHPQALIYPLTVASK	MTOR	016_MSC346_PRM_D23.raw	1570044	428286312448	3.66587e-06	Li_2018_D	1	0.9304	1.11075
YHPQALIYPLTVASK	MTOR	017_MSC346_PRM_D23.raw	1538324	613658066944	2.50681e-06	Li_2018_D	1	0.9442	0.75956
YHPQALIYPLTVASK	MTOR	018_MSC346_PRM_D23.raw	1213381	543936479232	2.23074e-06	Li_2018_D	1	0.9582	0.675911
YHPQALIYPLTVASK	MTOR	019_MSC346_PRM_D23.raw	1650198	516732977152	3.19352e-06	Li_2018_D	0.1	0.9554	0.967633
YHPQALIYPLTVASK	MTOR	020_MSC346_PRM_D23.raw	1338762	655402467328	2.04266e-06	Li_2018_D	0.1	0.9597	0.618922
YHPQALIYPLTVASK	MTOR	021_MSC346_PRM_D23.raw	1715704	656497508352	2.61342e-06	Li_2018_D	0.1	0.9433	0.791863
ETSFNQAYGR	MTOR	001_MSC346_PRM_20230228172818_D23.raw	1930771	466340642816	4.14026e-06	Li_2018_D	0	0.9372	1.25188
ETSFNQAYGR	MTOR	002_MSC346_PRM_20230228191023_D23.raw	1186227	628807303168	1.88647e-06	Li_2018_D	0	0.9018	0.570407
ETSFNQAYGR	MTOR	003_MSC346_PRM_20230228205243_D23.raw	1967773	505206407168	3.89499e-06	Li_2018_D	0	0.9351	1.17772
ETSFNQAYGR	MTOR	004_MSC346_PRM_20230228231931_D23.raw	2154815	482381037568	4.46704e-06	Li_2018_D	10000	0.9716	1.35069
ETSFNQAYGR	MTOR	005_MSC346_PRM_20230301010203_D23.raw	2404913	511119654912	4.70519e-06	Li_2018_D	10000	0.9449	1.42269
ETSFNQAYGR	MTOR	006_MSC346_PRM_20230301024419_D23.raw	1871196	709233672192	2.63833e-06	Li_2018_D	10000	0.9376	0.797745
ETSFNQAYGR	MTOR	007_MSC346_PRM_20230301051107_D23.raw	2039643	582690537472	3.50039e-06	Li_2018_D	1000	0.9397	1.0584
ETSFNQAYGR	MTOR	008_MSC346_PRM_20230301065343_D23.raw	2526360	736397819904	3.4307e-06	Li_2018_D	1000	0.9289	1.03733
ETSFNQAYGR	MTOR	009_MSC346_PRM_20230301083619_D23.raw	2180542	680459042816	3.20452e-06	Li_2018_D	1000	0.9602	0.96894
ETSFNQAYGR	MTOR	010_MSC346_PRM_20230301110319_D23.raw	2151079	548949327872	3.91854e-06	Li_2018_D	100	0.9355	1.18484
ETSFNQAYGR	MTOR	011_MSC346_PRM_20230301124607_D23.raw	1755809	493777223680	3.55587e-06	Li_2018_D	100	0.9291	1.07518
ETSFNQAYGR	MTOR	012_MSC346_PRM_20230301142855_D23.raw	1281852	676670406656	1.89435e-06	Li_2018_D	100	0.9334	0.57279
ETSFNQAYGR	MTOR	013_MSC346_PRM_20230301165558_D23.raw	1656915	611439804416	2.70986e-06	Li_2018_D	10	0.9155	0.819372
ETSFNQAYGR	MTOR	014_MSC346_PRM_20230301183857_D23.raw	1845497	530941476864	3.4759e-06	Li_2018_D	10	0.9335	1.051
ETSFNQAYGR	MTOR	015_MSC346_PRM_20230301202149_D23.raw	1915077	628439711744	3.04735e-06	Li_2018_D	10	0.9448	0.921419
ETSFNQAYGR	MTOR	016_MSC346_PRM_D23.raw	2161206	428286312448	5.04617e-06	Li_2018_D	1	0.9388	1.5258
ETSFNQAYGR	MTOR	017_MSC346_PRM_D23.raw	2752953	613658066944	4.48614e-06	Li_2018_D	1	0.9456	1.35646
ETSFNQAYGR	MTOR	018_MSC346_PRM_D23.raw	1752727	543936479232	3.2223e-06	Li_2018_D	1	0.9629	0.974317
ETSFNQAYGR	MTOR	019_MSC346_PRM_D23.raw	1693839	516732977152	3.27798e-06	Li_2018_D	0.1	0.9217	0.991152
ETSFNQAYGR	MTOR	020_MSC346_PRM_D23.raw	2730656	655402467328	4.16638e-06	Li_2018_D	0.1	0.9333	1.25978
ETSFNQAYGR	MTOR	021_MSC346_PRM_D23.raw	1975752	656497508352	3.00953e-06	Li_2018_D	0.1	0.9266	0.909984
DLELAVPGTYDPNQPIIR	MTOR	001_MSC346_PRM_20230228172818_D23.raw	1939138	466340642816	4.1582e-06	Li_2018_D	0	0.9498	1.08081
DLELAVPGTYDPNQPIIR	MTOR	002_MSC346_PRM_20230228191023_D23.raw	2186185	628807303168	3.47672e-06	Li_2018_D	0	0.9851	0.903673
DLELAVPGTYDPNQPIIR	MTOR	003_MSC346_PRM_20230228205243_D23.raw	1973860	505206407168	3.90704e-06	Li_2018_D	0	0.996	1.01552
DLELAVPGTYDPNQPIIR	MTOR	004_MSC346_PRM_20230228231931_D23.raw	3121007	482381037568	6.47e-06	Li_2018_D	10000	0.9842	1.68169
DLELAVPGTYDPNQPIIR	MTOR	005_MSC346_PRM_20230301010203_D23.raw	2818358	511119654912	5.51409e-06	Li_2018_D	10000	0.9823	1.43323
DLELAVPGTYDPNQPIIR	MTOR	006_MSC346_PRM_20230301024419_D23.raw	1507359	709233672192	2.12533e-06	Li_2018_D	10000	0.8845	0.55242
DLELAVPGTYDPNQPIIR	MTOR	007_MSC346_PRM_20230301051107_D23.raw	1927964	582690537472	3.30873e-06	Li_2018_D	1000	0.9621	0.860009
DLELAVPGTYDPNQPIIR	MTOR	008_MSC346_PRM_20230301065343_D23.raw	4570462	736397819904	6.20651e-06	Li_2018_D	1000	0.9868	1.6132
DLELAVPGTYDPNQPIIR	MTOR	009_MSC346_PRM_20230301083619_D23.raw	2951102	680459042816	4.33693e-06	Li_2018_D	1000	0.9833	1.12726
DLELAVPGTYDPNQPIIR	MTOR	010_MSC346_PRM_20230301110319_D23.raw	2871088	548949327872	5.23015e-06	Li_2018_D	100	0.9928	1.35943
DLELAVPGTYDPNQPIIR	MTOR	011_MSC346_PRM_20230301124607_D23.raw	2685683	493777223680	5.43906e-06	Li_2018_D	100	0.98	1.41373
DLELAVPGTYDPNQPIIR	MTOR	012_MSC346_PRM_20230301142855_D23.raw	2881260	676670406656	4.258e-06	Li_2018_D	100	0.9839	1.10674
DLELAVPGTYDPNQPIIR	MTOR	013_MSC346_PRM_20230301165558_D23.raw	2095242	611439804416	3.42673e-06	Li_2018_D	10	0.9659	0.890681
DLELAVPGTYDPNQPIIR	MTOR	014_MSC346_PRM_20230301183857_D23.raw	2098697	530941476864	3.95278e-06	Li_2018_D	10	0.9747	1.02741
DLELAVPGTYDPNQPIIR	MTOR	015_MSC346_PRM_20230301202149_D23.raw	1636224	628439711744	2.60363e-06	Li_2018_D	10	0.9008	0.676739
DLELAVPGTYDPNQPIIR	MTOR	016_MSC346_PRM_D23.raw	1928971	428286312448	4.50393e-06	Li_2018_D	1	0.9876	1.17067
DLELAVPGTYDPNQPIIR	MTOR	017_MSC346_PRM_D23.raw	3683170	613658066944	6.00199e-06	Li_2018_D	1	0.987	1.56005
DLELAVPGTYDPNQPIIR	MTOR	018_MSC346_PRM_D23.raw	1436368	543936479232	2.64069e-06	Li_2018_D	1	0.9386	0.686372
DLELAVPGTYDPNQPIIR	MTOR	019_MSC346_PRM_D23.raw	2271531	516732977152	4.39595e-06	Li_2018_D	0.1	0.9629	1.1426
DLELAVPGTYDPNQPIIR	MTOR	020_MSC346_PRM_D23.raw	2705240	655402467328	4.1276e-06	Li_2018_D	0.1	0.9721	1.07285
DLELAVPGTYDPNQPIIR	MTOR	021_MSC346_PRM_D23.raw	1862248	656497508352	2.83664e-06	Li_2018_D	0.1	0.9634	0.737304
DLNSPHSR	PIK3CA	001_MSC289_PRM_D22.raw	124789	368048177152	3.39056e-07	WJ214-14	0	0.7532	1.20221
DLNSPHSR	PIK3CA	002_MSC289_PRM_D22.raw	87460	349124198400	2.50513e-07	WJ214-14	0	0.7593	0.888259
DLNSPHSR	PIK3CA	003_MSC289_PRM_D22.raw	81408	317367123968	2.56511e-07	WJ214-14	0	0.721	0.909527
DLNSPHSR	PIK3CA	013_MSC289_PRM_D22.raw	4386	423031799808	1.0368e-08	WJ214-14	10000	0.4792	0.0367626
DLNSPHSR	PIK3CA	014_MSC289_PRM_D22.raw	41380	443354611712	9.33339e-08	WJ214-14	10000	0.5947	0.33094
DLNSPHSR	PIK3CA	015_MSC289_PRM_D22.raw	19881	332736233472	5.975e-08	WJ214-14	10000	0.7453	0.21186
DLNSPHSR	PIK3CA	016_MSC289_PRM_D22.raw	5585	367171731456	1.52109e-08	WJ214-14	1000	0.7353	0.0539342
DLNSPHSR	PIK3CA	017_MSC289_PRM_D22.raw	5349	299599298560	1.78538e-08	WJ214-14	1000	0.4792	0.0633056
DLNSPHSR	PIK3CA	018_MSC289_PRM_D22.raw	0	336536403968	0	WJ214-14	1000	0	0
DLNSPHSR	PIK3CA	019_MSC289_PRM_D22.raw	9303	357550325760	2.60187e-08	WJ214-14	100	0.4792	0.0922563
DLNSPHSR	PIK3CA	020_MSC289_PRM_D22.raw	3226	425209757696	7.58684e-09	WJ214-14	100	0.4792	0.0269012
DLNSPHSR	PIK3CA	021_MSC289_PRM_D22.raw	0	378675658752	0	WJ214-14	100	0	0
DLNSPHSR	PIK3CA	022_MSC289_PRM_D22.raw	30748	481121075200	6.39091e-08	WJ214-14	10	0.7154	0.226607
DLNSPHSR	PIK3CA	023_MSC289_PRM_D22.raw	7705	505390858240	1.52456e-08	WJ214-14	10	0.7585	0.0540574
DLNSPHSR	PIK3CA	024_MSC289_PRM_D22.raw	35608	477316677632	7.46004e-08	WJ214-14	10	0.8404	0.264516
LINLTDILK	PIK3CA	001_MSC289_PRM_D22.raw	962925	368048177152	2.6163e-06	WJ214-14	0	0.8944	1.1365
LINLTDILK	PIK3CA	002_MSC289_PRM_D22.raw	701192	349124198400	2.00843e-06	WJ214-14	0	0.8991	0.872447
LINLTDILK	PIK3CA	003_MSC289_PRM_D22.raw	724064	317367123968	2.28147e-06	WJ214-14	0	0.903	0.991053
LINLTDILK	PIK3CA	013_MSC289_PRM_D22.raw	364283	423031799808	8.61124e-07	WJ214-14	10000	0.9077	0.374066
LINLTDILK	PIK3CA	014_MSC289_PRM_D22.raw	362663	443354611712	8.17998e-07	WJ214-14	10000	0.9031	0.355332
LINLTDILK	PIK3CA	015_MSC289_PRM_D22.raw	327540	332736233472	9.84383e-07	WJ214-14	10000	0.8715	0.427608
LINLTDILK	PIK3CA	016_MSC289_PRM_D22.raw	104145	367171731456	2.83641e-07	WJ214-14	1000	0.8272	0.123211
LINLTDILK	PIK3CA	017_MSC289_PRM_D22.raw	114372	299599298560	3.8175e-07	WJ214-14	1000	0.8676	0.165829
LINLTDILK	PIK3CA	018_MSC289_PRM_D22.raw	89900	336536403968	2.67133e-07	WJ214-14	1000	0.7918	0.11604
LINLTDILK	PIK3CA	019_MSC289_PRM_D22.raw	205555	357550325760	5.74898e-07	WJ214-14	100	0.8786	0.249731
LINLTDILK	PIK3CA	020_MSC289_PRM_D22.raw	161332	425209757696	3.79417e-07	WJ214-14	100	0.8701	0.164816
LINLTDILK	PIK3CA	021_MSC289_PRM_D22.raw	197763	378675658752	5.22249e-07	WJ214-14	100	0.9161	0.226861
LINLTDILK	PIK3CA	022_MSC289_PRM_D22.raw	512634	481121075200	1.0655e-06	WJ214-14	10	0.9029	0.462844
LINLTDILK	PIK3CA	023_MSC289_PRM_D22.raw	583477	505390858240	1.15451e-06	WJ214-14	10	0.9021	0.501508
LINLTDILK	PIK3CA	024_MSC289_PRM_D22.raw	529022	477316677632	1.10832e-06	WJ214-14	10	0.8914	0.481448
IMENIWQNQGLDLR	PIK3CA	001_MSC289_PRM_D22.raw	25238	368048177152	6.85725e-08	WJ214-14	0	NA	0.39265
IMENIWQNQGLDLR	PIK3CA	002_MSC289_PRM_D22.raw	52166	349124198400	1.4942e-07	WJ214-14	0	NA	0.855584
IMENIWQNQGLDLR	PIK3CA	003_MSC289_PRM_D22.raw	97092	317367123968	3.0593e-07	WJ214-14	0	NA	1.75177
IMENIWQNQGLDLR	PIK3CA	013_MSC289_PRM_D22.raw	159698	423031799808	3.77508e-07	WJ214-14	10000	NA	2.16163
IMENIWQNQGLDLR	PIK3CA	014_MSC289_PRM_D22.raw	106310	443354611712	2.39785e-07	WJ214-14	10000	NA	1.37302
IMENIWQNQGLDLR	PIK3CA	015_MSC289_PRM_D22.raw	16218	332736233472	4.87413e-08	WJ214-14	10000	NA	0.279095
IMENIWQNQGLDLR	PIK3CA	016_MSC289_PRM_D22.raw	107695	367171731456	2.9331e-07	WJ214-14	1000	NA	1.6795
IMENIWQNQGLDLR	PIK3CA	017_MSC289_PRM_D22.raw	22959	299599298560	7.66324e-08	WJ214-14	1000	NA	0.4388
IMENIWQNQGLDLR	PIK3CA	018_MSC289_PRM_D22.raw	84674	336536403968	2.51604e-07	WJ214-14	1000	NA	1.4407
IMENIWQNQGLDLR	PIK3CA	019_MSC289_PRM_D22.raw	33579	357550325760	9.39141e-08	WJ214-14	100	NA	0.537756
IMENIWQNQGLDLR	PIK3CA	020_MSC289_PRM_D22.raw	109504	425209757696	2.57529e-07	WJ214-14	100	NA	1.47462
IMENIWQNQGLDLR	PIK3CA	021_MSC289_PRM_D22.raw	30306	378675658752	8.00316e-08	WJ214-14	100	NA	0.458264
IMENIWQNQGLDLR	PIK3CA	022_MSC289_PRM_D22.raw	144050	481121075200	2.99405e-07	WJ214-14	10	NA	1.71441
IMENIWQNQGLDLR	PIK3CA	023_MSC289_PRM_D22.raw	38828	505390858240	7.68277e-08	WJ214-14	10	NA	0.439919
IMENIWQNQGLDLR	PIK3CA	024_MSC289_PRM_D22.raw	50685	477316677632	1.06187e-07	WJ214-14	10	NA	0.608034
DDGQLFHIDFGHFLDHK	PIK3CA	001_MSC289_PRM_D22.raw	107744	368048177152	2.92744e-07	WJ214-14	0	0.933	1.25269
DDGQLFHIDFGHFLDHK	PIK3CA	002_MSC289_PRM_D22.raw	79563	349124198400	2.27893e-07	WJ214-14	0	0.8663	0.975183
DDGQLFHIDFGHFLDHK	PIK3CA	003_MSC289_PRM_D22.raw	57266	317367123968	1.80441e-07	WJ214-14	0	0.6742	0.772129
DDGQLFHIDFGHFLDHK	PIK3CA	013_MSC289_PRM_D22.raw	36014	423031799808	8.51331e-08	WJ214-14	10000	0.7798	0.364295
DDGQLFHIDFGHFLDHK	PIK3CA	014_MSC289_PRM_D22.raw	34543	443354611712	7.79128e-08	WJ214-14	10000	0.6882	0.333398
DDGQLFHIDFGHFLDHK	PIK3CA	015_MSC289_PRM_D22.raw	21450	332736233472	6.44655e-08	WJ214-14	10000	0.7188	0.275856
DDGQLFHIDFGHFLDHK	PIK3CA	016_MSC289_PRM_D22.raw	9480	367171731456	2.5819e-08	WJ214-14	1000	0.6152	0.110483
DDGQLFHIDFGHFLDHK	PIK3CA	017_MSC289_PRM_D22.raw	6990	299599298560	2.33312e-08	WJ214-14	1000	0.4413	0.0998369
DDGQLFHIDFGHFLDHK	PIK3CA	018_MSC289_PRM_D22.raw	4771	336536403968	1.41768e-08	WJ214-14	1000	0.3772	0.0606642
DDGQLFHIDFGHFLDHK	PIK3CA	019_MSC289_PRM_D22.raw	10317	357550325760	2.88547e-08	WJ214-14	100	0.5072	0.123473
DDGQLFHIDFGHFLDHK	PIK3CA	020_MSC289_PRM_D22.raw	5194	425209757696	1.22151e-08	WJ214-14	100	0.4156	0.0522701
DDGQLFHIDFGHFLDHK	PIK3CA	021_MSC289_PRM_D22.raw	8094	378675658752	2.13745e-08	WJ214-14	100	0.5096	0.0914641
DDGQLFHIDFGHFLDHK	PIK3CA	022_MSC289_PRM_D22.raw	46465	481121075200	9.65765e-08	WJ214-14	10	0.7958	0.413263
DDGQLFHIDFGHFLDHK	PIK3CA	023_MSC289_PRM_D22.raw	57194	505390858240	1.13168e-07	WJ214-14	10	0.8557	0.484259
DDGQLFHIDFGHFLDHK	PIK3CA	024_MSC289_PRM_D22.raw	48839	477316677632	1.0232e-07	WJ214-14	10	0.6851	0.437839
MDWIFHTIK	PIK3CA	001_MSC289_PRM_D22.raw	130786	368048177152	3.5535e-07	WJ214-14	0	0.9678	1.13204
MDWIFHTIK	PIK3CA	002_MSC289_PRM_D22.raw	113406	349124198400	3.2483e-07	WJ214-14	0	0.9274	1.03482
MDWIFHTIK	PIK3CA	003_MSC289_PRM_D22.raw	82999	317367123968	2.61524e-07	WJ214-14	0	0.9054	0.83314
MDWIFHTIK	PIK3CA	013_MSC289_PRM_D22.raw	46247	423031799808	1.09323e-07	WJ214-14	10000	0.9593	0.348271
MDWIFHTIK	PIK3CA	014_MSC289_PRM_D22.raw	52839	443354611712	1.1918e-07	WJ214-14	10000	0.9109	0.379674
MDWIFHTIK	PIK3CA	015_MSC289_PRM_D22.raw	52306	332736233472	1.572e-07	WJ214-14	10000	0.7326	0.500793
MDWIFHTIK	PIK3CA	016_MSC289_PRM_D22.raw	10778	367171731456	2.93541e-08	WJ214-14	1000	0.534	0.0935138
MDWIFHTIK	PIK3CA	017_MSC289_PRM_D22.raw	6537	299599298560	2.18191e-08	WJ214-14	1000	0.5204	0.0695096
MDWIFHTIK	PIK3CA	018_MSC289_PRM_D22.raw	3386	336536403968	1.00613e-08	WJ214-14	1000	0.3403	0.0320525
MDWIFHTIK	PIK3CA	019_MSC289_PRM_D22.raw	28070	357550325760	7.85064e-08	WJ214-14	100	0.9091	0.250099
MDWIFHTIK	PIK3CA	020_MSC289_PRM_D22.raw	13918	425209757696	3.27321e-08	WJ214-14	100	0.5218	0.104275
MDWIFHTIK	PIK3CA	021_MSC289_PRM_D22.raw	16158	378675658752	4.26698e-08	WJ214-14	100	0.5453	0.135934
MDWIFHTIK	PIK3CA	022_MSC289_PRM_D22.raw	76935	481121075200	1.59908e-07	WJ214-14	10	0.9696	0.509421
MDWIFHTIK	PIK3CA	023_MSC289_PRM_D22.raw	103797	505390858240	2.0538e-07	WJ214-14	10	0.9719	0.654281
MDWIFHTIK	PIK3CA	024_MSC289_PRM_D22.raw	112476	477316677632	2.35642e-07	WJ214-14	10	0.9544	0.750689
DLNSPHSR	PIK3CA	001_MSC274_PRM_D22.raw	96484	337336074240	2.86017e-07	WJ213-14	0	0.7579	1.01909
DLNSPHSR	PIK3CA	002_MSC274_PRM_D22.raw	91792	323030679552	2.84159e-07	WJ213-14	0	0.7475	1.01247
DLNSPHSR	PIK3CA	003_MSC274_PRM_D22.raw	99555	366277132288	2.71802e-07	WJ213-14	0	0.7508	0.968442
DLNSPHSR	PIK3CA	004_MSC274_PRM_D22.raw	60671	202785210368	2.99188e-07	WJ213-14	10000	0.7503	1.06602
DLNSPHSR	PIK3CA	005_MSC274_PRM_D22.raw	67513	227234480128	2.97107e-07	WJ213-14	10000	0.7598	1.0586
DLNSPHSR	PIK3CA	006_MSC274_PRM_D22.raw	69418	219833450496	3.15775e-07	WJ213-14	10000	0.8408	1.12512
DLNSPHSR	PIK3CA	007_MSC274_PRM_D22.raw	68504	341204598784	2.00771e-07	WJ213-14	1000	0.7544	0.715354
DLNSPHSR	PIK3CA	008_MSC274_PRM_D22.raw	29221	364720914432	8.01188e-08	WJ213-14	1000	0.6451	0.285466
DLNSPHSR	PIK3CA	009_MSC274_PRM_D22.raw	55324	377121931264	1.46701e-07	WJ213-14	1000	0.7318	0.522699
DLNSPHSR	PIK3CA	010_MSC274_PRM_D22.raw	0	357457821696	0	WJ213-14	100	0	0
DLNSPHSR	PIK3CA	011_MSC274_PRM_D22.raw	0	420418945024	0	WJ213-14	100	0	0
DLNSPHSR	PIK3CA	012_MSC274_PRM_D22.raw	0	392504999936	0	WJ213-14	100	0	0
DLNSPHSR	PIK3CA	013_MSC274_PRM_D22.raw	0	442199343104	0	WJ213-14	10	0	0
DLNSPHSR	PIK3CA	014_MSC274_PRM_D22.raw	0	428330188800	0	WJ213-14	10	0	0
DLNSPHSR	PIK3CA	015_MSC274_PRM_D22.raw	4928	400532373504	1.23036e-08	WJ213-14	10	0.7427	0.0438383
DLNSPHSR	PIK3CA	016_MSC274_PRM_D22.raw	13393	398537490432	3.36054e-08	WJ213-14	1	0.7549	0.119737
DLNSPHSR	PIK3CA	017_MSC274_PRM_D22.raw	0	374449340416	0	WJ213-14	1	0	0
DLNSPHSR	PIK3CA	018_MSC274_PRM_D22.raw	2722	453997297664	5.99563e-09	WJ213-14	1	0.7598	0.0213626
DLNSPHSR	PIK3CA	019_MSC274_PRM_D22.raw	3927	390866042880	1.00469e-08	WJ213-14	0.1	0.4792	0.0357975
DLNSPHSR	PIK3CA	020_MSC274_PRM_D22.raw	72488	465672863744	1.55663e-07	WJ213-14	0.1	0.7572	0.554633
DLNSPHSR	PIK3CA	021_MSC274_PRM_D22.raw	30061	425007546368	7.07305e-08	WJ213-14	0.1	0.7555	0.252015
LINLTDILK	PIK3CA	001_MSC274_PRM_D22.raw	724386	337336074240	2.14737e-06	WJ213-14	0	0.8962	1.02541
LINLTDILK	PIK3CA	002_MSC274_PRM_D22.raw	663651	323030679552	2.05445e-06	WJ213-14	0	0.9042	0.981042
LINLTDILK	PIK3CA	003_MSC274_PRM_D22.raw	762088	366277132288	2.08063e-06	WJ213-14	0	0.9046	0.993544
LINLTDILK	PIK3CA	004_MSC274_PRM_D22.raw	359549	202785210368	1.77305e-06	WJ213-14	10000	0.913	0.846669
LINLTDILK	PIK3CA	005_MSC274_PRM_D22.raw	466236	227234480128	2.05178e-06	WJ213-14	10000	0.8945	0.979768
LINLTDILK	PIK3CA	006_MSC274_PRM_D22.raw	419031	219833450496	1.90613e-06	WJ213-14	10000	0.9035	0.910215
LINLTDILK	PIK3CA	007_MSC274_PRM_D22.raw	676586	341204598784	1.98293e-06	WJ213-14	1000	0.8934	0.946891
LINLTDILK	PIK3CA	008_MSC274_PRM_D22.raw	570448	364720914432	1.56407e-06	WJ213-14	1000	0.9058	0.746874
LINLTDILK	PIK3CA	009_MSC274_PRM_D22.raw	687761	377121931264	1.82371e-06	WJ213-14	1000	0.9	0.870858
LINLTDILK	PIK3CA	010_MSC274_PRM_D22.raw	231744	357457821696	6.48311e-07	WJ213-14	100	0.9127	0.309582
LINLTDILK	PIK3CA	011_MSC274_PRM_D22.raw	236817	420418945024	5.63288e-07	WJ213-14	100	0.9222	0.268981
LINLTDILK	PIK3CA	012_MSC274_PRM_D22.raw	198976	392504999936	5.06939e-07	WJ213-14	100	0.8822	0.242074
LINLTDILK	PIK3CA	013_MSC274_PRM_D22.raw	100402	442199343104	2.27051e-07	WJ213-14	10	0.7418	0.108422
LINLTDILK	PIK3CA	014_MSC274_PRM_D22.raw	75424	428330188800	1.76088e-07	WJ213-14	10	0.6383	0.0840858
LINLTDILK	PIK3CA	015_MSC274_PRM_D22.raw	70633	400532373504	1.76348e-07	WJ213-14	10	0.6915	0.0842096
LINLTDILK	PIK3CA	016_MSC274_PRM_D22.raw	177447	398537490432	4.45245e-07	WJ213-14	1	0.8987	0.212614
LINLTDILK	PIK3CA	017_MSC274_PRM_D22.raw	178753	374449340416	4.77376e-07	WJ213-14	1	0.7576	0.227957
LINLTDILK	PIK3CA	018_MSC274_PRM_D22.raw	205671	453997297664	4.53023e-07	WJ213-14	1	0.8747	0.216327
LINLTDILK	PIK3CA	019_MSC274_PRM_D22.raw	581186	390866042880	1.48692e-06	WJ213-14	0.1	0.9068	0.710034
LINLTDILK	PIK3CA	020_MSC274_PRM_D22.raw	761435	465672863744	1.63513e-06	WJ213-14	0.1	0.8971	0.780807
LINLTDILK	PIK3CA	021_MSC274_PRM_D22.raw	611528	425007546368	1.43886e-06	WJ213-14	0.1	0.9009	0.687087
IMENIWQNQGLDLR	PIK3CA	001_MSC274_PRM_D22.raw	7630	337336074240	2.26184e-08	WJ213-14	0	NA	0.208878
IMENIWQNQGLDLR	PIK3CA	002_MSC274_PRM_D22.raw	21369	323030679552	6.61516e-08	WJ213-14	0	NA	0.6109
IMENIWQNQGLDLR	PIK3CA	003_MSC274_PRM_D22.raw	86473	366277132288	2.36086e-07	WJ213-14	0	NA	2.18022
IMENIWQNQGLDLR	PIK3CA	004_MSC274_PRM_D22.raw	48605	202785210368	2.39687e-07	WJ213-14	10000	NA	2.21348
IMENIWQNQGLDLR	PIK3CA	005_MSC274_PRM_D22.raw	59632	227234480128	2.62425e-07	WJ213-14	10000	NA	2.42346
IMENIWQNQGLDLR	PIK3CA	006_MSC274_PRM_D22.raw	38369	219833450496	1.74537e-07	WJ213-14	10000	NA	1.61182
IMENIWQNQGLDLR	PIK3CA	007_MSC274_PRM_D22.raw	68667	341204598784	2.01249e-07	WJ213-14	1000	NA	1.8585
IMENIWQNQGLDLR	PIK3CA	008_MSC274_PRM_D22.raw	53466	364720914432	1.46594e-07	WJ213-14	1000	NA	1.35378
IMENIWQNQGLDLR	PIK3CA	009_MSC274_PRM_D22.raw	54928	377121931264	1.45651e-07	WJ213-14	1000	NA	1.34506
IMENIWQNQGLDLR	PIK3CA	010_MSC274_PRM_D22.raw	46121	357457821696	1.29025e-07	WJ213-14	100	NA	1.19153
IMENIWQNQGLDLR	PIK3CA	011_MSC274_PRM_D22.raw	93699	420418945024	2.22871e-07	WJ213-14	100	NA	2.05818
IMENIWQNQGLDLR	PIK3CA	012_MSC274_PRM_D22.raw	74397	392504999936	1.89544e-07	WJ213-14	100	NA	1.75041
IMENIWQNQGLDLR	PIK3CA	013_MSC274_PRM_D22.raw	45708	442199343104	1.03365e-07	WJ213-14	10	NA	0.954562
IMENIWQNQGLDLR	PIK3CA	014_MSC274_PRM_D22.raw	99183	428330188800	2.31557e-07	WJ213-14	10	NA	2.1384
IMENIWQNQGLDLR	PIK3CA	015_MSC274_PRM_D22.raw	100718	400532373504	2.5146e-07	WJ213-14	10	NA	2.3222
IMENIWQNQGLDLR	PIK3CA	016_MSC274_PRM_D22.raw	30934	398537490432	7.76188e-08	WJ213-14	1	NA	0.716798
IMENIWQNQGLDLR	PIK3CA	017_MSC274_PRM_D22.raw	114121	374449340416	3.0477e-07	WJ213-14	1	NA	2.81451
IMENIWQNQGLDLR	PIK3CA	018_MSC274_PRM_D22.raw	115736	453997297664	2.54927e-07	WJ213-14	1	NA	2.35421
IMENIWQNQGLDLR	PIK3CA	019_MSC274_PRM_D22.raw	101006	390866042880	2.58416e-07	WJ213-14	0.1	NA	2.38643
IMENIWQNQGLDLR	PIK3CA	020_MSC274_PRM_D22.raw	101532	465672863744	2.18033e-07	WJ213-14	0.1	NA	2.0135
IMENIWQNQGLDLR	PIK3CA	021_MSC274_PRM_D22.raw	70024	425007546368	1.64759e-07	WJ213-14	0.1	NA	1.52153
DDGQLFHIDFGHFLDHK	PIK3CA	001_MSC274_PRM_D22.raw	106346	337336074240	3.15252e-07	WJ213-14	0	0.8956	1.14042
DDGQLFHIDFGHFLDHK	PIK3CA	002_MSC274_PRM_D22.raw	89105	323030679552	2.75841e-07	WJ213-14	0	0.8875	0.997849
DDGQLFHIDFGHFLDHK	PIK3CA	003_MSC274_PRM_D22.raw	87252	366277132288	2.38213e-07	WJ213-14	0	0.8935	0.861732
DDGQLFHIDFGHFLDHK	PIK3CA	004_MSC274_PRM_D22.raw	52046	202785210368	2.56656e-07	WJ213-14	10000	0.7739	0.928448
DDGQLFHIDFGHFLDHK	PIK3CA	005_MSC274_PRM_D22.raw	51277	227234480128	2.25657e-07	WJ213-14	10000	0.7786	0.816309
DDGQLFHIDFGHFLDHK	PIK3CA	006_MSC274_PRM_D22.raw	57252	219833450496	2.60434e-07	WJ213-14	10000	0.8343	0.942114
DDGQLFHIDFGHFLDHK	PIK3CA	007_MSC274_PRM_D22.raw	69521	341204598784	2.03752e-07	WJ213-14	1000	0.8567	0.737068
DDGQLFHIDFGHFLDHK	PIK3CA	008_MSC274_PRM_D22.raw	70600	364720914432	1.93573e-07	WJ213-14	1000	0.8782	0.700246
DDGQLFHIDFGHFLDHK	PIK3CA	009_MSC274_PRM_D22.raw	71285	377121931264	1.89024e-07	WJ213-14	1000	0.6851	0.68379
DDGQLFHIDFGHFLDHK	PIK3CA	010_MSC274_PRM_D22.raw	9668	357457821696	2.70465e-08	WJ213-14	100	0.5096	0.0978404
DDGQLFHIDFGHFLDHK	PIK3CA	011_MSC274_PRM_D22.raw	35306	420418945024	8.39781e-08	WJ213-14	100	0.462	0.303789
DDGQLFHIDFGHFLDHK	PIK3CA	012_MSC274_PRM_D22.raw	22103	392504999936	5.63127e-08	WJ213-14	100	0.5401	0.20371
DDGQLFHIDFGHFLDHK	PIK3CA	013_MSC274_PRM_D22.raw	33416	442199343104	7.55677e-08	WJ213-14	10	0.4795	0.273365
DDGQLFHIDFGHFLDHK	PIK3CA	014_MSC274_PRM_D22.raw	26893	428330188800	6.27857e-08	WJ213-14	10	0.4698	0.227126
DDGQLFHIDFGHFLDHK	PIK3CA	015_MSC274_PRM_D22.raw	0	400532373504	0	WJ213-14	10	0	0
DDGQLFHIDFGHFLDHK	PIK3CA	016_MSC274_PRM_D22.raw	34175	398537490432	8.5751e-08	WJ213-14	1	0.4819	0.310203
DDGQLFHIDFGHFLDHK	PIK3CA	017_MSC274_PRM_D22.raw	14475	374449340416	3.86568e-08	WJ213-14	1	0.6504	0.13984
DDGQLFHIDFGHFLDHK	PIK3CA	018_MSC274_PRM_D22.raw	47644	453997297664	1.04943e-07	WJ213-14	1	0.4697	0.379631
DDGQLFHIDFGHFLDHK	PIK3CA	019_MSC274_PRM_D22.raw	48874	390866042880	1.2504e-07	WJ213-14	0.1	0.6424	0.452331
DDGQLFHIDFGHFLDHK	PIK3CA	020_MSC274_PRM_D22.raw	91562	465672863744	1.96623e-07	WJ213-14	0.1	0.9083	0.71128
DDGQLFHIDFGHFLDHK	PIK3CA	021_MSC274_PRM_D22.raw	66860	425007546368	1.57315e-07	WJ213-14	0.1	0.9089	0.569084
MDWIFHTIK	PIK3CA	001_MSC274_PRM_D22.raw	118175	337336074240	3.50318e-07	WJ213-14	0	0.9492	1.01037
MDWIFHTIK	PIK3CA	002_MSC274_PRM_D22.raw	97884	323030679552	3.03018e-07	WJ213-14	0	0.9425	0.87395
MDWIFHTIK	PIK3CA	003_MSC274_PRM_D22.raw	141687	366277132288	3.8683e-07	WJ213-14	0	0.9716	1.11568
MDWIFHTIK	PIK3CA	004_MSC274_PRM_D22.raw	48607	202785210368	2.39697e-07	WJ213-14	10000	0.922	0.691323
MDWIFHTIK	PIK3CA	005_MSC274_PRM_D22.raw	41977	227234480128	1.8473e-07	WJ213-14	10000	0.9158	0.53279
MDWIFHTIK	PIK3CA	006_MSC274_PRM_D22.raw	59729	219833450496	2.71701e-07	WJ213-14	10000	0.7235	0.783628
MDWIFHTIK	PIK3CA	007_MSC274_PRM_D22.raw	94378	341204598784	2.76602e-07	WJ213-14	1000	0.931	0.797764
MDWIFHTIK	PIK3CA	008_MSC274_PRM_D22.raw	100997	364720914432	2.76916e-07	WJ213-14	1000	0.934	0.798668
MDWIFHTIK	PIK3CA	009_MSC274_PRM_D22.raw	104327	377121931264	2.7664e-07	WJ213-14	1000	0.9206	0.797873
MDWIFHTIK	PIK3CA	010_MSC274_PRM_D22.raw	35407	357457821696	9.90522e-08	WJ213-14	100	0.9511	0.285682
MDWIFHTIK	PIK3CA	011_MSC274_PRM_D22.raw	16667	420418945024	3.96438e-08	WJ213-14	100	0.536	0.114339
MDWIFHTIK	PIK3CA	012_MSC274_PRM_D22.raw	22027	392504999936	5.6119e-08	WJ213-14	100	0.6761	0.161856
MDWIFHTIK	PIK3CA	013_MSC274_PRM_D22.raw	10435	442199343104	2.3598e-08	WJ213-14	10	0.7275	0.0680602
MDWIFHTIK	PIK3CA	014_MSC274_PRM_D22.raw	6392	428330188800	1.49231e-08	WJ213-14	10	0.3688	0.0430404
MDWIFHTIK	PIK3CA	015_MSC274_PRM_D22.raw	16683	400532373504	4.16521e-08	WJ213-14	10	0.5403	0.120131
MDWIFHTIK	PIK3CA	016_MSC274_PRM_D22.raw	8119	398537490432	2.0372e-08	WJ213-14	1	0.3688	0.058756
MDWIFHTIK	PIK3CA	017_MSC274_PRM_D22.raw	28500	374449340416	7.61118e-08	WJ213-14	1	0.7034	0.219518
MDWIFHTIK	PIK3CA	018_MSC274_PRM_D22.raw	13377	453997297664	2.94649e-08	WJ213-14	1	0.3688	0.0849814
MDWIFHTIK	PIK3CA	019_MSC274_PRM_D22.raw	64591	390866042880	1.65251e-07	WJ213-14	0.1	0.9692	0.476609
MDWIFHTIK	PIK3CA	020_MSC274_PRM_D22.raw	132861	465672863744	2.8531e-07	WJ213-14	0.1	0.9626	0.822877
MDWIFHTIK	PIK3CA	021_MSC274_PRM_D22.raw	133234	425007546368	3.13486e-07	WJ213-14	0.1	0.9797	0.904143
DLNSPHSR	PIK3CA	001_MSC348_PRM_D23.raw	12602	223617728512	5.63551e-08	WJ209-17	0	0.6598	0.925561
DLNSPHSR	PIK3CA	002_MSC348_PRM_D23.raw	16172	243015024640	6.65473e-08	WJ209-17	0	0.6874	1.09296
DLNSPHSR	PIK3CA	003_MSC348_PRM_D23.raw	12034	201372041216	5.976e-08	WJ209-17	0	0.6401	0.981483
DLNSPHSR	PIK3CA	016_MSC348_PRM_D23.raw	0	259979657216	0	WJ209-17	1000	0	0
DLNSPHSR	PIK3CA	017_MSC348_PRM_D23.raw	0	262071910400	0	WJ209-17	1000	0	0
DLNSPHSR	PIK3CA	018_MSC348_PRM_D23.raw	0	261689311232	0	WJ209-17	1000	0	0
DLNSPHSR	PIK3CA	019_MSC348_PRM_D23.raw	0	290072887296	0	WJ209-17	100	0	0
DLNSPHSR	PIK3CA	020_MSC348_PRM_D23.raw	0	303300444160	0	WJ209-17	100	0	0
DLNSPHSR	PIK3CA	021_MSC348_PRM_D23.raw	0	300021415936	0	WJ209-17	100	0	0
DLNSPHSR	PIK3CA	022_MSC348_PRM_D23.raw	37735	329996075008	1.1435e-07	WJ209-17	10	0.7283	1.87805
DLNSPHSR	PIK3CA	023_MSC348_PRM_D23.raw	20683	303187132416	6.82186e-08	WJ209-17	10	0.7143	1.1204
DLNSPHSR	PIK3CA	024_MSC348_PRM_D23.raw	9806	284640149504	3.44505e-08	WJ209-17	10	0.7578	0.565806
LINLTDILK	PIK3CA	001_MSC348_PRM_D23.raw	299658	223617728512	1.34005e-06	WJ209-17	0	0.9064	0.853029
LINLTDILK	PIK3CA	002_MSC348_PRM_D23.raw	506148	243015024640	2.08278e-06	WJ209-17	0	0.9274	1.32583
LINLTDILK	PIK3CA	003_MSC348_PRM_D23.raw	259760	201372041216	1.28995e-06	WJ209-17	0	0.9005	0.82114
LINLTDILK	PIK3CA	016_MSC348_PRM_D23.raw	41169	259979657216	1.58355e-07	WJ209-17	1000	0.565	0.100803
LINLTDILK	PIK3CA	017_MSC348_PRM_D23.raw	50346	262071910400	1.92108e-07	WJ209-17	1000	0.5415	0.122289
LINLTDILK	PIK3CA	018_MSC348_PRM_D23.raw	37401	261689311232	1.42921e-07	WJ209-17	1000	0.5844	0.090979
LINLTDILK	PIK3CA	019_MSC348_PRM_D23.raw	57391	290072887296	1.9785e-07	WJ209-17	100	0.6583	0.125945
LINLTDILK	PIK3CA	020_MSC348_PRM_D23.raw	64647	303300444160	2.13145e-07	WJ209-17	100	0.6921	0.135681
LINLTDILK	PIK3CA	021_MSC348_PRM_D23.raw	67649	300021415936	2.25481e-07	WJ209-17	100	0.751	0.143533
LINLTDILK	PIK3CA	022_MSC348_PRM_D23.raw	340843	329996075008	1.03287e-06	WJ209-17	10	0.9021	0.657491
LINLTDILK	PIK3CA	023_MSC348_PRM_D23.raw	476905	303187132416	1.57297e-06	WJ209-17	10	0.9094	1.0013
LINLTDILK	PIK3CA	024_MSC348_PRM_D23.raw	412523	284640149504	1.44928e-06	WJ209-17	10	0.8972	0.922563
IMENIWQNQGLDLR	PIK3CA	001_MSC348_PRM_D23.raw	186319	223617728512	8.33203e-07	WJ209-17	0	NA	1.94272
IMENIWQNQGLDLR	PIK3CA	002_MSC348_PRM_D23.raw	31463	243015024640	1.29469e-07	WJ209-17	0	NA	0.301874
IMENIWQNQGLDLR	PIK3CA	003_MSC348_PRM_D23.raw	65241	201372041216	3.23982e-07	WJ209-17	0	NA	0.755406
IMENIWQNQGLDLR	PIK3CA	016_MSC348_PRM_D23.raw	50061	259979657216	1.92557e-07	WJ209-17	1000	NA	0.448972
IMENIWQNQGLDLR	PIK3CA	017_MSC348_PRM_D23.raw	18669	262071910400	7.12362e-08	WJ209-17	1000	NA	0.166096
IMENIWQNQGLDLR	PIK3CA	018_MSC348_PRM_D23.raw	140234	261689311232	5.3588e-07	WJ209-17	1000	NA	1.24947
IMENIWQNQGLDLR	PIK3CA	019_MSC348_PRM_D23.raw	116750	290072887296	4.02485e-07	WJ209-17	100	NA	0.938445
IMENIWQNQGLDLR	PIK3CA	020_MSC348_PRM_D23.raw	116614	303300444160	3.84483e-07	WJ209-17	100	NA	0.896472
IMENIWQNQGLDLR	PIK3CA	021_MSC348_PRM_D23.raw	61367	300021415936	2.04542e-07	WJ209-17	100	NA	0.476916
IMENIWQNQGLDLR	PIK3CA	022_MSC348_PRM_D23.raw	73954	329996075008	2.24106e-07	WJ209-17	10	NA	0.522531
IMENIWQNQGLDLR	PIK3CA	023_MSC348_PRM_D23.raw	910316	303187132416	3.00249e-06	WJ209-17	10	NA	7.00069
IMENIWQNQGLDLR	PIK3CA	024_MSC348_PRM_D23.raw	109646	284640149504	3.85209e-07	WJ209-17	10	NA	0.898164
DDGQLFHIDFGHFLDHK	PIK3CA	001_MSC348_PRM_D23.raw	10080	223617728512	4.50769e-08	WJ209-17	0	0.5101	2.07595
DDGQLFHIDFGHFLDHK	PIK3CA	002_MSC348_PRM_D23.raw	4876	243015024640	2.00646e-08	WJ209-17	0	0.3772	0.924047
DDGQLFHIDFGHFLDHK	PIK3CA	003_MSC348_PRM_D23.raw	0	201372041216	0	WJ209-17	0	0	0
DDGQLFHIDFGHFLDHK	PIK3CA	016_MSC348_PRM_D23.raw	0	259979657216	0	WJ209-17	1000	0	0
DDGQLFHIDFGHFLDHK	PIK3CA	017_MSC348_PRM_D23.raw	0	262071910400	0	WJ209-17	1000	0	0
DDGQLFHIDFGHFLDHK	PIK3CA	018_MSC348_PRM_D23.raw	0	261689311232	0	WJ209-17	1000	0	0
DDGQLFHIDFGHFLDHK	PIK3CA	019_MSC348_PRM_D23.raw	0	290072887296	0	WJ209-17	100	0	0
DDGQLFHIDFGHFLDHK	PIK3CA	020_MSC348_PRM_D23.raw	0	303300444160	0	WJ209-17	100	0	0
DDGQLFHIDFGHFLDHK	PIK3CA	021_MSC348_PRM_D23.raw	2472	300021415936	8.23941e-09	WJ209-17	100	0.1976	0.379454
DDGQLFHIDFGHFLDHK	PIK3CA	022_MSC348_PRM_D23.raw	9892	329996075008	2.99761e-08	WJ209-17	10	0.439	1.38051
DDGQLFHIDFGHFLDHK	PIK3CA	023_MSC348_PRM_D23.raw	9488	303187132416	3.12942e-08	WJ209-17	10	0.3772	1.44121
DDGQLFHIDFGHFLDHK	PIK3CA	024_MSC348_PRM_D23.raw	11831	284640149504	4.15648e-08	WJ209-17	10	0.6229	1.91421
MDWIFHTIK	PIK3CA	001_MSC348_PRM_D23.raw	7830	223617728512	3.50151e-08	WJ209-17	0	0.4635	0.503268
MDWIFHTIK	PIK3CA	002_MSC348_PRM_D23.raw	26788	243015024640	1.10232e-07	WJ209-17	0	0.6983	1.58435
MDWIFHTIK	PIK3CA	003_MSC348_PRM_D23.raw	12783	201372041216	6.34795e-08	WJ209-17	0	0.7266	0.912383
MDWIFHTIK	PIK3CA	016_MSC348_PRM_D23.raw	0	259979657216	0	WJ209-17	1000	0	0
MDWIFHTIK	PIK3CA	017_MSC348_PRM_D23.raw	0	262071910400	0	WJ209-17	1000	0	0
MDWIFHTIK	PIK3CA	018_MSC348_PRM_D23.raw	0	261689311232	0	WJ209-17	1000	0	0
MDWIFHTIK	PIK3CA	019_MSC348_PRM_D23.raw	0	290072887296	0	WJ209-17	100	0	0
MDWIFHTIK	PIK3CA	020_MSC348_PRM_D23.raw	0	303300444160	0	WJ209-17	100	0	0
MDWIFHTIK	PIK3CA	021_MSC348_PRM_D23.raw	0	300021415936	0	WJ209-17	100	0	0
MDWIFHTIK	PIK3CA	022_MSC348_PRM_D23.raw	23548	329996075008	7.13584e-08	WJ209-17	10	0.6972	1.02563
MDWIFHTIK	PIK3CA	023_MSC348_PRM_D23.raw	12904	303187132416	4.25612e-08	WJ209-17	10	0.5298	0.611726
MDWIFHTIK	PIK3CA	024_MSC348_PRM_D23.raw	16405	284640149504	5.76342e-08	WJ209-17	10	0.7078	0.828369
DLNSPHSR	PIK3CA	001_MSC348_PRM_D23.raw	12602	223617728512	5.63551e-08	WJ208-16	0	0.6598	0.925561
DLNSPHSR	PIK3CA	002_MSC348_PRM_D23.raw	16172	243015024640	6.65473e-08	WJ208-16	0	0.6874	1.09296
DLNSPHSR	PIK3CA	003_MSC348_PRM_D23.raw	12034	201372041216	5.976e-08	WJ208-16	0	0.6401	0.981483
DLNSPHSR	PIK3CA	004_MSC348_PRM_D23.raw	1112	240364617728	4.6263e-09	WJ208-16	10000	0.4792	0.0759812
DLNSPHSR	PIK3CA	005_MSC348_PRM_D23.raw	0	283313635328	0	WJ208-16	10000	0	0
DLNSPHSR	PIK3CA	006_MSC348_PRM_D23.raw	0	277262991360	0	WJ208-16	10000	0	0
DLNSPHSR	PIK3CA	007_MSC348_PRM_D23.raw	0	271293153280	0	WJ208-16	1000	0	0
DLNSPHSR	PIK3CA	008_MSC348_PRM_D23.raw	1035	268928679936	3.8486e-09	WJ208-16	1000	0.4792	0.0632085
DLNSPHSR	PIK3CA	009_MSC348_PRM_D23.raw	0	258914435072	0	WJ208-16	1000	0	0
DLNSPHSR	PIK3CA	010_MSC348_PRM_D23.raw	2864	328512503808	8.71809e-09	WJ208-16	100	0.4619	0.143184
DLNSPHSR	PIK3CA	011_MSC348_PRM_D23.raw	3010	304371662848	9.88923e-09	WJ208-16	100	0.7594	0.162418
DLNSPHSR	PIK3CA	012_MSC348_PRM_D23.raw	8098	306149883904	2.64511e-08	WJ208-16	100	0.4792	0.434426
DLNSPHSR	PIK3CA	013_MSC348_PRM_D23.raw	24482	234827530240	1.04255e-07	WJ208-16	10	0.7593	1.71226
DLNSPHSR	PIK3CA	014_MSC348_PRM_D23.raw	27598	292100669440	9.44811e-08	WJ208-16	10	0.7494	1.55173
DLNSPHSR	PIK3CA	015_MSC348_PRM_D23.raw	37037	295058604032	1.25524e-07	WJ208-16	10	0.7407	2.06158
LINLTDILK	PIK3CA	001_MSC348_PRM_D23.raw	299658	223617728512	1.34005e-06	WJ208-16	0	0.9064	0.853029
LINLTDILK	PIK3CA	002_MSC348_PRM_D23.raw	506148	243015024640	2.08278e-06	WJ208-16	0	0.9274	1.32583
LINLTDILK	PIK3CA	003_MSC348_PRM_D23.raw	259760	201372041216	1.28995e-06	WJ208-16	0	0.9005	0.82114
LINLTDILK	PIK3CA	004_MSC348_PRM_D23.raw	46349	240364617728	1.92828e-07	WJ208-16	10000	0.6388	0.122748
LINLTDILK	PIK3CA	005_MSC348_PRM_D23.raw	46648	283313635328	1.64651e-07	WJ208-16	10000	0.6783	0.104812
LINLTDILK	PIK3CA	006_MSC348_PRM_D23.raw	53833	277262991360	1.94159e-07	WJ208-16	10000	0.5604	0.123595
LINLTDILK	PIK3CA	007_MSC348_PRM_D23.raw	43793	271293153280	1.61423e-07	WJ208-16	1000	0.653	0.102757
LINLTDILK	PIK3CA	008_MSC348_PRM_D23.raw	32926	268928679936	1.22434e-07	WJ208-16	1000	0.7003	0.0779374
LINLTDILK	PIK3CA	009_MSC348_PRM_D23.raw	50409	258914435072	1.94694e-07	WJ208-16	1000	0.7656	0.123936
LINLTDILK	PIK3CA	010_MSC348_PRM_D23.raw	303570	328512503808	9.24074e-07	WJ208-16	100	0.8843	0.588235
LINLTDILK	PIK3CA	011_MSC348_PRM_D23.raw	300838	304371662848	9.8839e-07	WJ208-16	100	0.9051	0.629176
LINLTDILK	PIK3CA	012_MSC348_PRM_D23.raw	270980	306149883904	8.85122e-07	WJ208-16	100	0.8935	0.563439
LINLTDILK	PIK3CA	013_MSC348_PRM_D23.raw	510583	234827530240	2.17429e-06	WJ208-16	10	0.9146	1.38408
LINLTDILK	PIK3CA	014_MSC348_PRM_D23.raw	502673	292100669440	1.72089e-06	WJ208-16	10	0.8982	1.09546
LINLTDILK	PIK3CA	015_MSC348_PRM_D23.raw	526249	295058604032	1.78354e-06	WJ208-16	10	0.9156	1.13534
IMENIWQNQGLDLR	PIK3CA	001_MSC348_PRM_D23.raw	186319	223617728512	8.33203e-07	WJ208-16	0	NA	1.94272
IMENIWQNQGLDLR	PIK3CA	002_MSC348_PRM_D23.raw	31463	243015024640	1.29469e-07	WJ208-16	0	NA	0.301874
IMENIWQNQGLDLR	PIK3CA	003_MSC348_PRM_D23.raw	65241	201372041216	3.23982e-07	WJ208-16	0	NA	0.755406
IMENIWQNQGLDLR	PIK3CA	004_MSC348_PRM_D23.raw	38627	240364617728	1.60702e-07	WJ208-16	10000	NA	0.374696
IMENIWQNQGLDLR	PIK3CA	005_MSC348_PRM_D23.raw	75318	283313635328	2.65847e-07	WJ208-16	10000	NA	0.619856
IMENIWQNQGLDLR	PIK3CA	006_MSC348_PRM_D23.raw	57842	277262991360	2.08618e-07	WJ208-16	10000	NA	0.486419
IMENIWQNQGLDLR	PIK3CA	007_MSC348_PRM_D23.raw	36990	271293153280	1.36347e-07	WJ208-16	1000	NA	0.31791
IMENIWQNQGLDLR	PIK3CA	008_MSC348_PRM_D23.raw	286890	268928679936	1.06679e-06	WJ208-16	1000	NA	2.48735
IMENIWQNQGLDLR	PIK3CA	009_MSC348_PRM_D23.raw	298579	258914435072	1.1532e-06	WJ208-16	1000	NA	2.68882
IMENIWQNQGLDLR	PIK3CA	010_MSC348_PRM_D23.raw	754591	328512503808	2.29699e-06	WJ208-16	100	NA	5.35573
IMENIWQNQGLDLR	PIK3CA	011_MSC348_PRM_D23.raw	25093	304371662848	8.2442e-08	WJ208-16	100	NA	0.192224
IMENIWQNQGLDLR	PIK3CA	012_MSC348_PRM_D23.raw	89563	306149883904	2.92546e-07	WJ208-16	100	NA	0.682109
IMENIWQNQGLDLR	PIK3CA	013_MSC348_PRM_D23.raw	98067	234827530240	4.17613e-07	WJ208-16	10	NA	0.973718
IMENIWQNQGLDLR	PIK3CA	014_MSC348_PRM_D23.raw	83997	292100669440	2.87562e-07	WJ208-16	10	NA	0.670487
IMENIWQNQGLDLR	PIK3CA	015_MSC348_PRM_D23.raw	80832	295058604032	2.73952e-07	WJ208-16	10	NA	0.638755
DDGQLFHIDFGHFLDHK	PIK3CA	001_MSC348_PRM_D23.raw	10080	223617728512	4.50769e-08	WJ208-16	0	0.5101	2.07595
DDGQLFHIDFGHFLDHK	PIK3CA	002_MSC348_PRM_D23.raw	4876	243015024640	2.00646e-08	WJ208-16	0	0.3772	0.924047
DDGQLFHIDFGHFLDHK	PIK3CA	003_MSC348_PRM_D23.raw	0	201372041216	0	WJ208-16	0	0	0
DDGQLFHIDFGHFLDHK	PIK3CA	004_MSC348_PRM_D23.raw	0	240364617728	0	WJ208-16	10000	0	0
DDGQLFHIDFGHFLDHK	PIK3CA	005_MSC348_PRM_D23.raw	3125	283313635328	1.10302e-08	WJ208-16	10000	0.1976	0.507979
DDGQLFHIDFGHFLDHK	PIK3CA	006_MSC348_PRM_D23.raw	0	277262991360	0	WJ208-16	10000	0	0
DDGQLFHIDFGHFLDHK	PIK3CA	007_MSC348_PRM_D23.raw	3272	271293153280	1.20608e-08	WJ208-16	1000	0.1976	0.555441
DDGQLFHIDFGHFLDHK	PIK3CA	008_MSC348_PRM_D23.raw	0	268928679936	0	WJ208-16	1000	0	0
DDGQLFHIDFGHFLDHK	PIK3CA	009_MSC348_PRM_D23.raw	3322	258914435072	1.28305e-08	WJ208-16	1000	0.2998	0.59089
DDGQLFHIDFGHFLDHK	PIK3CA	010_MSC348_PRM_D23.raw	9043	328512503808	2.75271e-08	WJ208-16	100	0.506	1.26772
DDGQLFHIDFGHFLDHK	PIK3CA	011_MSC348_PRM_D23.raw	15650	304371662848	5.14174e-08	WJ208-16	100	0.6446	2.36795
DDGQLFHIDFGHFLDHK	PIK3CA	012_MSC348_PRM_D23.raw	0	306149883904	0	WJ208-16	100	0	0
DDGQLFHIDFGHFLDHK	PIK3CA	013_MSC348_PRM_D23.raw	31023	234827530240	1.3211e-07	WJ208-16	10	0.7203	6.08412
DDGQLFHIDFGHFLDHK	PIK3CA	014_MSC348_PRM_D23.raw	20488	292100669440	7.01402e-08	WJ208-16	10	0.5111	3.23021
DDGQLFHIDFGHFLDHK	PIK3CA	015_MSC348_PRM_D23.raw	19607	295058604032	6.64512e-08	WJ208-16	10	0.6783	3.06032
MDWIFHTIK	PIK3CA	001_MSC348_PRM_D23.raw	7830	223617728512	3.50151e-08	WJ208-16	0	0.4635	0.503268
MDWIFHTIK	PIK3CA	002_MSC348_PRM_D23.raw	26788	243015024640	1.10232e-07	WJ208-16	0	0.6983	1.58435
MDWIFHTIK	PIK3CA	003_MSC348_PRM_D23.raw	12783	201372041216	6.34795e-08	WJ208-16	0	0.7266	0.912383
MDWIFHTIK	PIK3CA	004_MSC348_PRM_D23.raw	0	240364617728	0	WJ208-16	10000	0	0
MDWIFHTIK	PIK3CA	005_MSC348_PRM_D23.raw	0	283313635328	0	WJ208-16	10000	0	0
MDWIFHTIK	PIK3CA	006_MSC348_PRM_D23.raw	0	277262991360	0	WJ208-16	10000	0	0
MDWIFHTIK	PIK3CA	007_MSC348_PRM_D23.raw	0	271293153280	0	WJ208-16	1000	0	0
MDWIFHTIK	PIK3CA	008_MSC348_PRM_D23.raw	0	268928679936	0	WJ208-16	1000	0	0
MDWIFHTIK	PIK3CA	009_MSC348_PRM_D23.raw	0	258914435072	0	WJ208-16	1000	0	0
MDWIFHTIK	PIK3CA	010_MSC348_PRM_D23.raw	9240	328512503808	2.81268e-08	WJ208-16	100	0.7315	0.404263
MDWIFHTIK	PIK3CA	011_MSC348_PRM_D23.raw	8436	304371662848	2.77161e-08	WJ208-16	100	0.3688	0.39836
MDWIFHTIK	PIK3CA	012_MSC348_PRM_D23.raw	14866	306149883904	4.85579e-08	WJ208-16	100	0.62	0.697917
MDWIFHTIK	PIK3CA	013_MSC348_PRM_D23.raw	40647	234827530240	1.73093e-07	WJ208-16	10	0.7221	2.48784
MDWIFHTIK	PIK3CA	014_MSC348_PRM_D23.raw	40703	292100669440	1.39346e-07	WJ208-16	10	0.8923	2.0028
MDWIFHTIK	PIK3CA	015_MSC348_PRM_D23.raw	70436	295058604032	2.38719e-07	WJ208-16	10	0.9645	3.43107
DLNSPHSR	PIK3CA	001_MSC289_PRM_D22.raw	124789	368048177152	3.39056e-07	WJ204-12	0	0.7532	1.20221
DLNSPHSR	PIK3CA	002_MSC289_PRM_D22.raw	87460	349124198400	2.50513e-07	WJ204-12	0	0.7593	0.888259
DLNSPHSR	PIK3CA	003_MSC289_PRM_D22.raw	81408	317367123968	2.56511e-07	WJ204-12	0	0.721	0.909527
DLNSPHSR	PIK3CA	004_MSC289_PRM_D22.raw	3085	385995243520	7.99233e-09	WJ204-12	100	0.4792	0.0283389
DLNSPHSR	PIK3CA	005_MSC289_PRM_D22.raw	0	368185769984	0	WJ204-12	100	0	0
DLNSPHSR	PIK3CA	006_MSC289_PRM_D22.raw	2816	400164388864	7.03711e-09	WJ204-12	100	0.4792	0.0249519
DLNSPHSR	PIK3CA	007_MSC289_PRM_D22.raw	1410	397327663104	3.54871e-09	WJ204-12	10	0.4792	0.0125829
DLNSPHSR	PIK3CA	008_MSC289_PRM_D22.raw	2579	445503668224	5.78895e-09	WJ204-12	10	0.4792	0.0205263
DLNSPHSR	PIK3CA	009_MSC289_PRM_D22.raw	1657	436157349888	3.79909e-09	WJ204-12	10	0.4792	0.0134707
DLNSPHSR	PIK3CA	010_MSC289_PRM_D22.raw	3858	428040912896	9.01316e-09	WJ204-12	1	0.7526	0.0319586
DLNSPHSR	PIK3CA	011_MSC289_PRM_D22.raw	31976	425787359232	7.50985e-08	WJ204-12	1	0.4792	0.266282
DLNSPHSR	PIK3CA	012_MSC289_PRM_D22.raw	10196	413678501888	2.46472e-08	WJ204-12	1	0.6887	0.0873931
LINLTDILK	PIK3CA	001_MSC289_PRM_D22.raw	962925	368048177152	2.6163e-06	WJ204-12	0	0.8944	1.1365
LINLTDILK	PIK3CA	002_MSC289_PRM_D22.raw	701192	349124198400	2.00843e-06	WJ204-12	0	0.8991	0.872447
LINLTDILK	PIK3CA	003_MSC289_PRM_D22.raw	724064	317367123968	2.28147e-06	WJ204-12	0	0.903	0.991053
LINLTDILK	PIK3CA	004_MSC289_PRM_D22.raw	127394	385995243520	3.3004e-07	WJ204-12	100	0.882	0.143367
LINLTDILK	PIK3CA	005_MSC289_PRM_D22.raw	120646	368185769984	3.27677e-07	WJ204-12	100	0.8796	0.14234
LINLTDILK	PIK3CA	006_MSC289_PRM_D22.raw	121417	400164388864	3.03418e-07	WJ204-12	100	0.8959	0.131802
LINLTDILK	PIK3CA	007_MSC289_PRM_D22.raw	122517	397327663104	3.08353e-07	WJ204-12	10	0.9302	0.133946
LINLTDILK	PIK3CA	008_MSC289_PRM_D22.raw	122352	445503668224	2.74637e-07	WJ204-12	10	0.8685	0.1193
LINLTDILK	PIK3CA	009_MSC289_PRM_D22.raw	142913	436157349888	3.27664e-07	WJ204-12	10	0.8846	0.142335
LINLTDILK	PIK3CA	010_MSC289_PRM_D22.raw	392915	428040912896	9.17938e-07	WJ204-12	1	0.9098	0.398745
LINLTDILK	PIK3CA	011_MSC289_PRM_D22.raw	335352	425787359232	7.87604e-07	WJ204-12	1	0.9135	0.342129
LINLTDILK	PIK3CA	012_MSC289_PRM_D22.raw	272679	413678501888	6.59157e-07	WJ204-12	1	0.8943	0.286332
IMENIWQNQGLDLR	PIK3CA	001_MSC289_PRM_D22.raw	25238	368048177152	6.85725e-08	WJ204-12	0	NA	0.39265
IMENIWQNQGLDLR	PIK3CA	002_MSC289_PRM_D22.raw	52166	349124198400	1.4942e-07	WJ204-12	0	NA	0.855584
IMENIWQNQGLDLR	PIK3CA	003_MSC289_PRM_D22.raw	97092	317367123968	3.0593e-07	WJ204-12	0	NA	1.75177
IMENIWQNQGLDLR	PIK3CA	004_MSC289_PRM_D22.raw	135404	385995243520	3.50792e-07	WJ204-12	100	NA	2.00865
IMENIWQNQGLDLR	PIK3CA	005_MSC289_PRM_D22.raw	36014	368185769984	9.78148e-08	WJ204-12	100	NA	0.560092
IMENIWQNQGLDLR	PIK3CA	006_MSC289_PRM_D22.raw	56658	400164388864	1.41587e-07	WJ204-12	100	NA	0.810733
IMENIWQNQGLDLR	PIK3CA	007_MSC289_PRM_D22.raw	98154	397327663104	2.47035e-07	WJ204-12	10	NA	1.41454
IMENIWQNQGLDLR	PIK3CA	008_MSC289_PRM_D22.raw	30631	445503668224	6.87559e-08	WJ204-12	10	NA	0.393699
IMENIWQNQGLDLR	PIK3CA	009_MSC289_PRM_D22.raw	125392	436157349888	2.87493e-07	WJ204-12	10	NA	1.6462
IMENIWQNQGLDLR	PIK3CA	010_MSC289_PRM_D22.raw	15365	428040912896	3.58961e-08	WJ204-12	1	NA	0.205543
IMENIWQNQGLDLR	PIK3CA	011_MSC289_PRM_D22.raw	32311	425787359232	7.58853e-08	WJ204-12	1	NA	0.434523
IMENIWQNQGLDLR	PIK3CA	012_MSC289_PRM_D22.raw	41416	413678501888	1.00116e-07	WJ204-12	1	NA	0.573271
DDGQLFHIDFGHFLDHK	PIK3CA	001_MSC289_PRM_D22.raw	107744	368048177152	2.92744e-07	WJ204-12	0	0.933	1.25269
DDGQLFHIDFGHFLDHK	PIK3CA	002_MSC289_PRM_D22.raw	79563	349124198400	2.27893e-07	WJ204-12	0	0.8663	0.975183
DDGQLFHIDFGHFLDHK	PIK3CA	003_MSC289_PRM_D22.raw	57266	317367123968	1.80441e-07	WJ204-12	0	0.6742	0.772129
DDGQLFHIDFGHFLDHK	PIK3CA	004_MSC289_PRM_D22.raw	0	385995243520	0	WJ204-12	100	0	0
DDGQLFHIDFGHFLDHK	PIK3CA	005_MSC289_PRM_D22.raw	4131	368185769984	1.12199e-08	WJ204-12	100	0.3772	0.0480112
DDGQLFHIDFGHFLDHK	PIK3CA	006_MSC289_PRM_D22.raw	10098	400164388864	2.52346e-08	WJ204-12	100	0.4578	0.107982
DDGQLFHIDFGHFLDHK	PIK3CA	007_MSC289_PRM_D22.raw	4040	397327663104	1.01679e-08	WJ204-12	10	0.2632	0.0435098
DDGQLFHIDFGHFLDHK	PIK3CA	008_MSC289_PRM_D22.raw	4238	445503668224	9.51283e-09	WJ204-12	10	0.3772	0.0407066
DDGQLFHIDFGHFLDHK	PIK3CA	009_MSC289_PRM_D22.raw	19194	436157349888	4.40071e-08	WJ204-12	10	0.6373	0.188312
DDGQLFHIDFGHFLDHK	PIK3CA	010_MSC289_PRM_D22.raw	36850	428040912896	8.60899e-08	WJ204-12	1	0.7879	0.368389
DDGQLFHIDFGHFLDHK	PIK3CA	011_MSC289_PRM_D22.raw	23714	425787359232	5.56945e-08	WJ204-12	1	0.5868	0.238323
DDGQLFHIDFGHFLDHK	PIK3CA	012_MSC289_PRM_D22.raw	15795	413678501888	3.81818e-08	WJ204-12	1	0.5088	0.163385
MDWIFHTIK	PIK3CA	001_MSC289_PRM_D22.raw	130786	368048177152	3.5535e-07	WJ204-12	0	0.9678	1.13204
MDWIFHTIK	PIK3CA	002_MSC289_PRM_D22.raw	113406	349124198400	3.2483e-07	WJ204-12	0	0.9274	1.03482
MDWIFHTIK	PIK3CA	003_MSC289_PRM_D22.raw	82999	317367123968	2.61524e-07	WJ204-12	0	0.9054	0.83314
MDWIFHTIK	PIK3CA	004_MSC289_PRM_D22.raw	9872	385995243520	2.55754e-08	WJ204-12	100	0.6535	0.0814761
MDWIFHTIK	PIK3CA	005_MSC289_PRM_D22.raw	6721	368185769984	1.82544e-08	WJ204-12	100	0.5475	0.0581532
MDWIFHTIK	PIK3CA	006_MSC289_PRM_D22.raw	10305	400164388864	2.57519e-08	WJ204-12	100	0.5368	0.0820383
MDWIFHTIK	PIK3CA	007_MSC289_PRM_D22.raw	11743	397327663104	2.9555e-08	WJ204-12	10	0.526	0.0941537
MDWIFHTIK	PIK3CA	008_MSC289_PRM_D22.raw	12339	445503668224	2.76967e-08	WJ204-12	10	0.7207	0.0882339
MDWIFHTIK	PIK3CA	009_MSC289_PRM_D22.raw	4901	436157349888	1.12368e-08	WJ204-12	10	0.3688	0.0357971
MDWIFHTIK	PIK3CA	010_MSC289_PRM_D22.raw	50393	428040912896	1.17729e-07	WJ204-12	1	0.9353	0.375052
MDWIFHTIK	PIK3CA	011_MSC289_PRM_D22.raw	43308	425787359232	1.01713e-07	WJ204-12	1	0.725	0.324028
MDWIFHTIK	PIK3CA	012_MSC289_PRM_D22.raw	51245	413678501888	1.23876e-07	WJ204-12	1	0.8736	0.394635
DLNSPHSR	PIK3CA	001_MSC349_PRM_r_D23.raw	67333	234732617728	2.8685e-07	WJ203-14	0	0.7289	0.913385
DLNSPHSR	PIK3CA	002_MSC349_PRM_r_D23.raw	89722	228691574784	3.92328e-07	WJ203-14	0	0.7481	1.24925
DLNSPHSR	PIK3CA	003_MSC349_PRM_r_D23.raw	79418	301996474368	2.62977e-07	WJ203-14	0	0.7185	0.837368
DLNSPHSR	PIK3CA	004_MSC349_PRM_r_D23.raw	108684	245516173312	4.42676e-07	WJ203-14	10000	0.7428	1.40956
DLNSPHSR	PIK3CA	005_MSC349_PRM_r_D23.raw	100072	254776279040	3.92784e-07	WJ203-14	10000	0.749	1.2507
DLNSPHSR	PIK3CA	006_MSC349_PRM_r_D23.raw	74577	222754668544	3.34794e-07	WJ203-14	10000	0.736	1.06605
DLNSPHSR	PIK3CA	007_MSC349_PRM_r_D23.raw	105263	328033730560	3.20891e-07	WJ203-14	1000	0.7596	1.02178
DLNSPHSR	PIK3CA	008_MSC349_PRM_r_D23.raw	78794	289286029312	2.72374e-07	WJ203-14	1000	0.7506	0.867292
DLNSPHSR	PIK3CA	009_MSC349_PRM_r_D23.raw	84182	285042769920	2.95331e-07	WJ203-14	1000	0.742	0.940391
DLNSPHSR	PIK3CA	010_MSC349_PRM_r_D23.raw	124976	315635695616	3.9595e-07	WJ203-14	100	0.7682	1.26078
DLNSPHSR	PIK3CA	011_MSC349_PRM_r_D23.raw	124096	304782802944	4.07162e-07	WJ203-14	100	0.7443	1.29648
DLNSPHSR	PIK3CA	012_MSC349_PRM_r_D23.raw	97703	270687289344	3.60944e-07	WJ203-14	100	0.7265	1.14932
DLNSPHSR	PIK3CA	013_MSC349_PRM_r_D23.raw	85010	312186601472	2.72305e-07	WJ203-14	10	0.7598	0.867072
DLNSPHSR	PIK3CA	014_MSC349_PRM_r_D23.raw	98440	328095006720	3.00035e-07	WJ203-14	10	0.7435	0.95537
DLNSPHSR	PIK3CA	015_MSC349_PRM_r_D23.raw	88623	250457899008	3.53844e-07	WJ203-14	10	0.7255	1.12671
LINLTDILK	PIK3CA	001_MSC349_PRM_r_D23.raw	177108	234732617728	7.5451e-07	WJ203-14	0	0.9038	1.56485
LINLTDILK	PIK3CA	002_MSC349_PRM_r_D23.raw	100226	228691574784	4.38258e-07	WJ203-14	0	0.9131	0.908944
LINLTDILK	PIK3CA	003_MSC349_PRM_r_D23.raw	76622	301996474368	2.53718e-07	WJ203-14	0	0.9035	0.526209
LINLTDILK	PIK3CA	004_MSC349_PRM_r_D23.raw	143664	245516173312	5.85151e-07	WJ203-14	10000	0.8963	1.2136
LINLTDILK	PIK3CA	005_MSC349_PRM_r_D23.raw	134795	254776279040	5.29072e-07	WJ203-14	10000	0.9188	1.09729
LINLTDILK	PIK3CA	006_MSC349_PRM_r_D23.raw	178718	222754668544	8.02309e-07	WJ203-14	10000	0.9166	1.66398
LINLTDILK	PIK3CA	007_MSC349_PRM_r_D23.raw	112735	328033730560	3.43669e-07	WJ203-14	1000	0.8912	0.712766
LINLTDILK	PIK3CA	008_MSC349_PRM_r_D23.raw	100742	289286029312	3.48244e-07	WJ203-14	1000	0.9008	0.722254
LINLTDILK	PIK3CA	009_MSC349_PRM_r_D23.raw	162250	285042769920	5.69213e-07	WJ203-14	1000	0.9033	1.18054
LINLTDILK	PIK3CA	010_MSC349_PRM_r_D23.raw	124111	315635695616	3.9321e-07	WJ203-14	100	0.8911	0.815513
LINLTDILK	PIK3CA	011_MSC349_PRM_r_D23.raw	139062	304782802944	4.56266e-07	WJ203-14	100	0.9213	0.946292
LINLTDILK	PIK3CA	012_MSC349_PRM_r_D23.raw	103250	270687289344	3.81436e-07	WJ203-14	100	0.9189	0.791096
LINLTDILK	PIK3CA	013_MSC349_PRM_r_D23.raw	81152	312186601472	2.59947e-07	WJ203-14	10	0.9151	0.539128
LINLTDILK	PIK3CA	014_MSC349_PRM_r_D23.raw	104793	328095006720	3.19398e-07	WJ203-14	10	0.8729	0.662429
LINLTDILK	PIK3CA	015_MSC349_PRM_r_D23.raw	128970	250457899008	5.14937e-07	WJ203-14	10	0.922	1.06797
IMENIWQNQGLDLR	PIK3CA	001_MSC349_PRM_r_D23.raw	204842	234732617728	8.72661e-07	WJ203-14	0	NA	1.18849
IMENIWQNQGLDLR	PIK3CA	002_MSC349_PRM_r_D23.raw	78639	228691574784	3.43865e-07	WJ203-14	0	NA	0.468316
IMENIWQNQGLDLR	PIK3CA	003_MSC349_PRM_r_D23.raw	297843	301996474368	9.86247e-07	WJ203-14	0	NA	1.34319
IMENIWQNQGLDLR	PIK3CA	004_MSC349_PRM_r_D23.raw	263336	245516173312	1.07258e-06	WJ203-14	10000	NA	1.46077
IMENIWQNQGLDLR	PIK3CA	005_MSC349_PRM_r_D23.raw	17006	254776279040	6.67488e-08	WJ203-14	10000	NA	0.0909065
IMENIWQNQGLDLR	PIK3CA	006_MSC349_PRM_r_D23.raw	258886	222754668544	1.1622e-06	WJ203-14	10000	NA	1.58283
IMENIWQNQGLDLR	PIK3CA	007_MSC349_PRM_r_D23.raw	308365	328033730560	9.40041e-07	WJ203-14	1000	NA	1.28026
IMENIWQNQGLDLR	PIK3CA	008_MSC349_PRM_r_D23.raw	307230	289286029312	1.06203e-06	WJ203-14	1000	NA	1.4464
IMENIWQNQGLDLR	PIK3CA	009_MSC349_PRM_r_D23.raw	29235	285042769920	1.02564e-07	WJ203-14	1000	NA	0.139683
IMENIWQNQGLDLR	PIK3CA	010_MSC349_PRM_r_D23.raw	68005	315635695616	2.15454e-07	WJ203-14	100	NA	0.293431
IMENIWQNQGLDLR	PIK3CA	011_MSC349_PRM_r_D23.raw	68554	304782802944	2.24927e-07	WJ203-14	100	NA	0.306333
IMENIWQNQGLDLR	PIK3CA	012_MSC349_PRM_r_D23.raw	320809	270687289344	1.18516e-06	WJ203-14	100	NA	1.6141
IMENIWQNQGLDLR	PIK3CA	013_MSC349_PRM_r_D23.raw	259149	312186601472	8.30109e-07	WJ203-14	10	NA	1.13054
IMENIWQNQGLDLR	PIK3CA	014_MSC349_PRM_r_D23.raw	210298	328095006720	6.40967e-07	WJ203-14	10	NA	0.872946
IMENIWQNQGLDLR	PIK3CA	015_MSC349_PRM_r_D23.raw	131852	250457899008	5.26444e-07	WJ203-14	10	NA	0.716974
DDGQLFHIDFGHFLDHK	PIK3CA	001_MSC349_PRM_r_D23.raw	1230	234732617728	5.24e-09	WJ203-14	0	0.2632	0.214373
DDGQLFHIDFGHFLDHK	PIK3CA	002_MSC349_PRM_r_D23.raw	10891	228691574784	4.76231e-08	WJ203-14	0	0.3361	1.9483
DDGQLFHIDFGHFLDHK	PIK3CA	003_MSC349_PRM_r_D23.raw	6181	301996474368	2.04671e-08	WJ203-14	0	0.5113	0.837327
DDGQLFHIDFGHFLDHK	PIK3CA	004_MSC349_PRM_r_D23.raw	0	245516173312	0	WJ203-14	10000	0	0
DDGQLFHIDFGHFLDHK	PIK3CA	005_MSC349_PRM_r_D23.raw	0	254776279040	0	WJ203-14	10000	0	0
DDGQLFHIDFGHFLDHK	PIK3CA	006_MSC349_PRM_r_D23.raw	0	222754668544	0	WJ203-14	10000	0	0
DDGQLFHIDFGHFLDHK	PIK3CA	007_MSC349_PRM_r_D23.raw	0	328033730560	0	WJ203-14	1000	0	0
DDGQLFHIDFGHFLDHK	PIK3CA	008_MSC349_PRM_r_D23.raw	2306	289286029312	7.97135e-09	WJ203-14	1000	0.2102	0.326114
DDGQLFHIDFGHFLDHK	PIK3CA	009_MSC349_PRM_r_D23.raw	0	285042769920	0	WJ203-14	1000	0	0
DDGQLFHIDFGHFLDHK	PIK3CA	010_MSC349_PRM_r_D23.raw	8459	315635695616	2.67999e-08	WJ203-14	100	0.5574	1.09641
DDGQLFHIDFGHFLDHK	PIK3CA	011_MSC349_PRM_r_D23.raw	7843	304782802944	2.57331e-08	WJ203-14	100	0.5078	1.05276
DDGQLFHIDFGHFLDHK	PIK3CA	012_MSC349_PRM_r_D23.raw	2652	270687289344	9.79728e-09	WJ203-14	100	0.2998	0.400815
DDGQLFHIDFGHFLDHK	PIK3CA	013_MSC349_PRM_r_D23.raw	2719	312186601472	8.70953e-09	WJ203-14	10	0.3772	0.356314
DDGQLFHIDFGHFLDHK	PIK3CA	014_MSC349_PRM_r_D23.raw	4800	328095006720	1.46299e-08	WJ203-14	10	0.3772	0.598522
DDGQLFHIDFGHFLDHK	PIK3CA	015_MSC349_PRM_r_D23.raw	0	250457899008	0	WJ203-14	10	0	0
MDWIFHTIK	PIK3CA	001_MSC349_PRM_r_D23.raw	2494	234732617728	1.06249e-08	WJ203-14	0	0.3688	0.252721
MDWIFHTIK	PIK3CA	002_MSC349_PRM_r_D23.raw	11736	228691574784	5.1318e-08	WJ203-14	0	0.5209	1.22064
MDWIFHTIK	PIK3CA	003_MSC349_PRM_r_D23.raw	19383	301996474368	6.41829e-08	WJ203-14	0	0.6996	1.52664
MDWIFHTIK	PIK3CA	004_MSC349_PRM_r_D23.raw	14120	245516173312	5.75115e-08	WJ203-14	10000	0.7241	1.36796
MDWIFHTIK	PIK3CA	005_MSC349_PRM_r_D23.raw	18556	254776279040	7.28325e-08	WJ203-14	10000	0.8857	1.73238
MDWIFHTIK	PIK3CA	006_MSC349_PRM_r_D23.raw	12258	222754668544	5.50291e-08	WJ203-14	10000	0.5186	1.30891
MDWIFHTIK	PIK3CA	007_MSC349_PRM_r_D23.raw	17190	328033730560	5.24031e-08	WJ203-14	1000	0.6471	1.24645
MDWIFHTIK	PIK3CA	008_MSC349_PRM_r_D23.raw	24758	289286029312	8.55831e-08	WJ203-14	1000	0.8688	2.03566
MDWIFHTIK	PIK3CA	009_MSC349_PRM_r_D23.raw	15803	285042769920	5.54408e-08	WJ203-14	1000	0.6491	1.3187
MDWIFHTIK	PIK3CA	010_MSC349_PRM_r_D23.raw	25765	315635695616	8.16289e-08	WJ203-14	100	0.6503	1.94161
MDWIFHTIK	PIK3CA	011_MSC349_PRM_r_D23.raw	29205	304782802944	9.58223e-08	WJ203-14	100	0.9026	2.27921
MDWIFHTIK	PIK3CA	012_MSC349_PRM_r_D23.raw	22893	270687289344	8.45736e-08	WJ203-14	100	0.7116	2.01165
MDWIFHTIK	PIK3CA	013_MSC349_PRM_r_D23.raw	28610	312186601472	9.16439e-08	WJ203-14	10	0.717	2.17982
MDWIFHTIK	PIK3CA	014_MSC349_PRM_r_D23.raw	32091	328095006720	9.78101e-08	WJ203-14	10	0.6885	2.32649
MDWIFHTIK	PIK3CA	015_MSC349_PRM_r_D23.raw	6892	250457899008	2.75176e-08	WJ203-14	10	0.5193	0.654528
DLNSPHSR	PIK3CA	001_MSC292_PRM_D22.raw	66014	319390449664	2.06687e-07	WJ202-15	0	0.7437	1.14838
DLNSPHSR	PIK3CA	002_MSC292_PRM_D22.raw	49077	351230066688	1.39729e-07	WJ202-15	0	0.6307	0.776351
DLNSPHSR	PIK3CA	003_MSC292_PRM_D22.raw	72644	375365763072	1.93529e-07	WJ202-15	0	0.7716	1.07527
DLNSPHSR	PIK3CA	013_MSC292_PRM_D22.raw	29140	341467299840	8.53376e-08	WJ202-15	1000	0.4792	0.474146
DLNSPHSR	PIK3CA	014_MSC292_PRM_D22.raw	0	374906847232	0	WJ202-15	1000	0	0
DLNSPHSR	PIK3CA	015_MSC292_PRM_D22.raw	2582	411407319040	6.27602e-09	WJ202-15	1000	0.1991	0.0348703
DLNSPHSR	PIK3CA	016_MSC292_PRM_D22.raw	1101	417004093440	2.64026e-09	WJ202-15	100	0.4792	0.0146696
DLNSPHSR	PIK3CA	017_MSC292_PRM_D22.raw	0	393033089024	0	WJ202-15	100	0	0
DLNSPHSR	PIK3CA	018_MSC292_PRM_D22.raw	0	426928177152	0	WJ202-15	100	0	0
DLNSPHSR	PIK3CA	019_MSC292_PRM_D22.raw	48055	430841298944	1.11538e-07	WJ202-15	10	0.7597	0.619716
DLNSPHSR	PIK3CA	020_MSC292_PRM_D22.raw	52099	433670029312	1.20135e-07	WJ202-15	10	0.7308	0.667485
DLNSPHSR	PIK3CA	021_MSC292_PRM_D22.raw	29569	376932859904	7.84463e-08	WJ202-15	10	0.7422	0.435857
DLNSPHSR	PIK3CA	022_MSC292_PRM_D22.raw	75580	414246764544	1.82452e-07	WJ202-15	1	0.7405	1.01372
DLNSPHSR	PIK3CA	023_MSC292_PRM_D22.raw	35899	368739975168	9.73559e-08	WJ202-15	1	0.7128	0.540921
DLNSPHSR	PIK3CA	024_MSC292_PRM_D22.raw	28321	394963615744	7.17053e-08	WJ202-15	1	0.6829	0.398404
LINLTDILK	PIK3CA	001_MSC292_PRM_D22.raw	969330	319390449664	3.03494e-06	WJ202-15	0	0.9016	1.06821
LINLTDILK	PIK3CA	002_MSC292_PRM_D22.raw	1030775	351230066688	2.93476e-06	WJ202-15	0	0.9092	1.03295
LINLTDILK	PIK3CA	003_MSC292_PRM_D22.raw	958588	375365763072	2.55374e-06	WJ202-15	0	0.9049	0.898843
LINLTDILK	PIK3CA	013_MSC292_PRM_D22.raw	110304	341467299840	3.23029e-07	WJ202-15	1000	0.8904	0.113697
LINLTDILK	PIK3CA	014_MSC292_PRM_D22.raw	101251	374906847232	2.7007e-07	WJ202-15	1000	0.8771	0.0950566
LINLTDILK	PIK3CA	015_MSC292_PRM_D22.raw	114717	411407319040	2.7884e-07	WJ202-15	1000	0.8638	0.0981436
LINLTDILK	PIK3CA	016_MSC292_PRM_D22.raw	142914	417004093440	3.42716e-07	WJ202-15	100	0.8852	0.120626
LINLTDILK	PIK3CA	017_MSC292_PRM_D22.raw	99983	393033089024	2.54388e-07	WJ202-15	100	0.8264	0.0895372
LINLTDILK	PIK3CA	018_MSC292_PRM_D22.raw	134371	426928177152	3.14739e-07	WJ202-15	100	0.861	0.110779
LINLTDILK	PIK3CA	019_MSC292_PRM_D22.raw	604151	430841298944	1.40226e-06	WJ202-15	10	0.9067	0.493554
LINLTDILK	PIK3CA	020_MSC292_PRM_D22.raw	578312	433670029312	1.33353e-06	WJ202-15	10	0.8919	0.469363
LINLTDILK	PIK3CA	021_MSC292_PRM_D22.raw	526759	376932859904	1.39749e-06	WJ202-15	10	0.9104	0.491875
LINLTDILK	PIK3CA	022_MSC292_PRM_D22.raw	913536	414246764544	2.20529e-06	WJ202-15	1	0.8975	0.776199
LINLTDILK	PIK3CA	023_MSC292_PRM_D22.raw	923421	368739975168	2.50426e-06	WJ202-15	1	0.9027	0.881426
LINLTDILK	PIK3CA	024_MSC292_PRM_D22.raw	893752	394963615744	2.26287e-06	WJ202-15	1	0.891	0.796464
IMENIWQNQGLDLR	PIK3CA	001_MSC292_PRM_D22.raw	5221	319390449664	1.63468e-08	WJ202-15	0	NA	0.435749
IMENIWQNQGLDLR	PIK3CA	002_MSC292_PRM_D22.raw	16526	351230066688	4.70518e-08	WJ202-15	0	NA	1.25424
IMENIWQNQGLDLR	PIK3CA	003_MSC292_PRM_D22.raw	18447	375365763072	4.91441e-08	WJ202-15	0	NA	1.31001
IMENIWQNQGLDLR	PIK3CA	013_MSC292_PRM_D22.raw	0	341467299840	0	WJ202-15	1000	NA	0
IMENIWQNQGLDLR	PIK3CA	014_MSC292_PRM_D22.raw	0	374906847232	0	WJ202-15	1000	NA	0
IMENIWQNQGLDLR	PIK3CA	015_MSC292_PRM_D22.raw	3861	411407319040	9.38486e-09	WJ202-15	1000	NA	0.250168
IMENIWQNQGLDLR	PIK3CA	016_MSC292_PRM_D22.raw	10340	417004093440	2.47959e-08	WJ202-15	100	NA	0.660974
IMENIWQNQGLDLR	PIK3CA	017_MSC292_PRM_D22.raw	13349	393033089024	3.39641e-08	WJ202-15	100	NA	0.905365
IMENIWQNQGLDLR	PIK3CA	018_MSC292_PRM_D22.raw	5449	426928177152	1.27633e-08	WJ202-15	100	NA	0.340225
IMENIWQNQGLDLR	PIK3CA	019_MSC292_PRM_D22.raw	16610	430841298944	3.85525e-08	WJ202-15	10	NA	1.02768
IMENIWQNQGLDLR	PIK3CA	020_MSC292_PRM_D22.raw	0	433670029312	0	WJ202-15	10	NA	0
IMENIWQNQGLDLR	PIK3CA	021_MSC292_PRM_D22.raw	9664	376932859904	2.56385e-08	WJ202-15	10	NA	0.683435
IMENIWQNQGLDLR	PIK3CA	022_MSC292_PRM_D22.raw	19932	414246764544	4.81162e-08	WJ202-15	1	NA	1.28261
IMENIWQNQGLDLR	PIK3CA	023_MSC292_PRM_D22.raw	17130	368739975168	4.64555e-08	WJ202-15	1	NA	1.23834
IMENIWQNQGLDLR	PIK3CA	024_MSC292_PRM_D22.raw	16615	394963615744	4.20672e-08	WJ202-15	1	NA	1.12137
DDGQLFHIDFGHFLDHK	PIK3CA	001_MSC292_PRM_D22.raw	112684	319390449664	3.5281e-07	WJ202-15	0	0.9372	0.962351
DDGQLFHIDFGHFLDHK	PIK3CA	002_MSC292_PRM_D22.raw	135605	351230066688	3.86086e-07	WJ202-15	0	0.942	1.05312
DDGQLFHIDFGHFLDHK	PIK3CA	003_MSC292_PRM_D22.raw	135485	375365763072	3.60941e-07	WJ202-15	0	0.9599	0.984531
DDGQLFHIDFGHFLDHK	PIK3CA	013_MSC292_PRM_D22.raw	0	341467299840	0	WJ202-15	1000	0	0
DDGQLFHIDFGHFLDHK	PIK3CA	014_MSC292_PRM_D22.raw	6803	374906847232	1.81458e-08	WJ202-15	1000	0.4738	0.049496
DDGQLFHIDFGHFLDHK	PIK3CA	015_MSC292_PRM_D22.raw	0	411407319040	0	WJ202-15	1000	0	0
DDGQLFHIDFGHFLDHK	PIK3CA	016_MSC292_PRM_D22.raw	4415	417004093440	1.05874e-08	WJ202-15	100	0.2998	0.0288791
DDGQLFHIDFGHFLDHK	PIK3CA	017_MSC292_PRM_D22.raw	11564	393033089024	2.94225e-08	WJ202-15	100	0.5075	0.080255
DDGQLFHIDFGHFLDHK	PIK3CA	018_MSC292_PRM_D22.raw	13907	426928177152	3.25746e-08	WJ202-15	100	0.5993	0.0888529
DDGQLFHIDFGHFLDHK	PIK3CA	019_MSC292_PRM_D22.raw	64875	430841298944	1.50577e-07	WJ202-15	10	0.9004	0.410727
DDGQLFHIDFGHFLDHK	PIK3CA	020_MSC292_PRM_D22.raw	73957	433670029312	1.70537e-07	WJ202-15	10	0.9223	0.465171
DDGQLFHIDFGHFLDHK	PIK3CA	021_MSC292_PRM_D22.raw	67622	376932859904	1.79401e-07	WJ202-15	10	0.775	0.489347
DDGQLFHIDFGHFLDHK	PIK3CA	022_MSC292_PRM_D22.raw	125787	414246764544	3.03652e-07	WJ202-15	1	0.9551	0.828266
DDGQLFHIDFGHFLDHK	PIK3CA	023_MSC292_PRM_D22.raw	140316	368739975168	3.80528e-07	WJ202-15	1	0.9259	1.03796
DDGQLFHIDFGHFLDHK	PIK3CA	024_MSC292_PRM_D22.raw	140386	394963615744	3.5544e-07	WJ202-15	1	0.8943	0.969527
MDWIFHTIK	PIK3CA	001_MSC292_PRM_D22.raw	131598	319390449664	4.12029e-07	WJ202-15	0	0.9607	0.977089
MDWIFHTIK	PIK3CA	002_MSC292_PRM_D22.raw	170183	351230066688	4.84534e-07	WJ202-15	0	0.9936	1.14903
MDWIFHTIK	PIK3CA	003_MSC292_PRM_D22.raw	138325	375365763072	3.68507e-07	WJ202-15	0	0.9567	0.873882
MDWIFHTIK	PIK3CA	013_MSC292_PRM_D22.raw	4989	341467299840	1.46105e-08	WJ202-15	1000	0.3512	0.0346474
MDWIFHTIK	PIK3CA	014_MSC292_PRM_D22.raw	5570	374906847232	1.4857e-08	WJ202-15	1000	0.3688	0.0352321
MDWIFHTIK	PIK3CA	015_MSC292_PRM_D22.raw	3333	411407319040	8.10146e-09	WJ202-15	1000	0.3688	0.0192119
MDWIFHTIK	PIK3CA	016_MSC292_PRM_D22.raw	14740	417004093440	3.53474e-08	WJ202-15	100	0.6468	0.0838231
MDWIFHTIK	PIK3CA	017_MSC292_PRM_D22.raw	3658	393033089024	9.3071e-09	WJ202-15	100	0.3688	0.022071
MDWIFHTIK	PIK3CA	018_MSC292_PRM_D22.raw	3573	426928177152	8.36909e-09	WJ202-15	100	0.3688	0.0198465
MDWIFHTIK	PIK3CA	019_MSC292_PRM_D22.raw	65504	430841298944	1.52037e-07	WJ202-15	10	0.9084	0.360543
MDWIFHTIK	PIK3CA	020_MSC292_PRM_D22.raw	83739	433670029312	1.93094e-07	WJ202-15	10	0.9483	0.457905
MDWIFHTIK	PIK3CA	021_MSC292_PRM_D22.raw	66563	376932859904	1.76591e-07	WJ202-15	10	0.9682	0.41877
MDWIFHTIK	PIK3CA	022_MSC292_PRM_D22.raw	96005	414246764544	2.31758e-07	WJ202-15	1	0.9642	0.549593
MDWIFHTIK	PIK3CA	023_MSC292_PRM_D22.raw	119687	368739975168	3.24584e-07	WJ202-15	1	0.9708	0.769721
MDWIFHTIK	PIK3CA	024_MSC292_PRM_D22.raw	95630	394963615744	2.42124e-07	WJ202-15	1	0.951	0.574174
DLNSPHSR	PIK3CA	001_MSC292_PRM_D22.raw	66014	319390449664	2.06687e-07	WJ201-13	0	0.7437	1.14838
DLNSPHSR	PIK3CA	002_MSC292_PRM_D22.raw	49077	351230066688	1.39729e-07	WJ201-13	0	0.6307	0.776351
DLNSPHSR	PIK3CA	003_MSC292_PRM_D22.raw	72644	375365763072	1.93529e-07	WJ201-13	0	0.7716	1.07527
DLNSPHSR	PIK3CA	004_MSC292_PRM_D22.raw	3254	367054553088	8.86517e-09	WJ201-13	100	0.4792	0.049256
DLNSPHSR	PIK3CA	005_MSC292_PRM_D22.raw	0	336322068480	0	WJ201-13	100	0	0
DLNSPHSR	PIK3CA	006_MSC292_PRM_D22.raw	9056	378640007168	2.39172e-08	WJ201-13	100	0.5301	0.132887
DLNSPHSR	PIK3CA	007_MSC292_PRM_D22.raw	29284	400295821312	7.31559e-08	WJ201-13	10	0.7323	0.406463
DLNSPHSR	PIK3CA	008_MSC292_PRM_D22.raw	14141	381586702336	3.70584e-08	WJ201-13	10	0.7582	0.205901
DLNSPHSR	PIK3CA	009_MSC292_PRM_D22.raw	39982	357919522816	1.11707e-07	WJ201-13	10	0.7264	0.620656
DLNSPHSR	PIK3CA	010_MSC292_PRM_D22.raw	83389	388651122688	2.1456e-07	WJ201-13	1	0.7347	1.19212
DLNSPHSR	PIK3CA	011_MSC292_PRM_D22.raw	76214	400786063360	1.90161e-07	WJ201-13	1	0.759	1.05656
DLNSPHSR	PIK3CA	012_MSC292_PRM_D22.raw	64074	386939125760	1.65592e-07	WJ201-13	1	0.7509	0.920049
LINLTDILK	PIK3CA	001_MSC292_PRM_D22.raw	969330	319390449664	3.03494e-06	WJ201-13	0	0.9016	1.06821
LINLTDILK	PIK3CA	002_MSC292_PRM_D22.raw	1030775	351230066688	2.93476e-06	WJ201-13	0	0.9092	1.03295
LINLTDILK	PIK3CA	003_MSC292_PRM_D22.raw	958588	375365763072	2.55374e-06	WJ201-13	0	0.9049	0.898843
LINLTDILK	PIK3CA	004_MSC292_PRM_D22.raw	175783	367054553088	4.78902e-07	WJ201-13	100	0.8947	0.168559
LINLTDILK	PIK3CA	005_MSC292_PRM_D22.raw	151976	336322068480	4.51876e-07	WJ201-13	100	0.8594	0.159047
LINLTDILK	PIK3CA	006_MSC292_PRM_D22.raw	162433	378640007168	4.28991e-07	WJ201-13	100	0.8984	0.150992
LINLTDILK	PIK3CA	007_MSC292_PRM_D22.raw	477142	400295821312	1.19197e-06	WJ201-13	10	0.8956	0.41954
LINLTDILK	PIK3CA	008_MSC292_PRM_D22.raw	485355	381586702336	1.27194e-06	WJ201-13	10	0.8933	0.447685
LINLTDILK	PIK3CA	009_MSC292_PRM_D22.raw	573208	357919522816	1.6015e-06	WJ201-13	10	0.8939	0.563681
LINLTDILK	PIK3CA	010_MSC292_PRM_D22.raw	865024	388651122688	2.22571e-06	WJ201-13	1	0.9068	0.783384
LINLTDILK	PIK3CA	011_MSC292_PRM_D22.raw	844926	400786063360	2.10817e-06	WJ201-13	1	0.8973	0.742015
LINLTDILK	PIK3CA	012_MSC292_PRM_D22.raw	963849	386939125760	2.49096e-06	WJ201-13	1	0.9008	0.876744
IMENIWQNQGLDLR	PIK3CA	001_MSC292_PRM_D22.raw	5221	319390449664	1.63468e-08	WJ201-13	0	NA	0.435749
IMENIWQNQGLDLR	PIK3CA	002_MSC292_PRM_D22.raw	16526	351230066688	4.70518e-08	WJ201-13	0	NA	1.25424
IMENIWQNQGLDLR	PIK3CA	003_MSC292_PRM_D22.raw	18447	375365763072	4.91441e-08	WJ201-13	0	NA	1.31001
IMENIWQNQGLDLR	PIK3CA	004_MSC292_PRM_D22.raw	6803	367054553088	1.8534e-08	WJ201-13	100	NA	0.494054
IMENIWQNQGLDLR	PIK3CA	005_MSC292_PRM_D22.raw	7933	336322068480	2.35875e-08	WJ201-13	100	NA	0.628762
IMENIWQNQGLDLR	PIK3CA	006_MSC292_PRM_D22.raw	9590	378640007168	2.53275e-08	WJ201-13	100	NA	0.675144
IMENIWQNQGLDLR	PIK3CA	007_MSC292_PRM_D22.raw	10009	400295821312	2.5004e-08	WJ201-13	10	NA	0.666521
IMENIWQNQGLDLR	PIK3CA	008_MSC292_PRM_D22.raw	2290	381586702336	6.00126e-09	WJ201-13	10	NA	0.159973
IMENIWQNQGLDLR	PIK3CA	009_MSC292_PRM_D22.raw	34174	357919522816	9.54796e-08	WJ201-13	10	NA	2.54516
IMENIWQNQGLDLR	PIK3CA	010_MSC292_PRM_D22.raw	1486	388651122688	3.82348e-09	WJ201-13	1	NA	0.101921
IMENIWQNQGLDLR	PIK3CA	011_MSC292_PRM_D22.raw	22223	400786063360	5.54485e-08	WJ201-13	1	NA	1.47807
IMENIWQNQGLDLR	PIK3CA	012_MSC292_PRM_D22.raw	4346	386939125760	1.12317e-08	WJ201-13	1	NA	0.2994
DDGQLFHIDFGHFLDHK	PIK3CA	001_MSC292_PRM_D22.raw	112684	319390449664	3.5281e-07	WJ201-13	0	0.9372	0.962351
DDGQLFHIDFGHFLDHK	PIK3CA	002_MSC292_PRM_D22.raw	135605	351230066688	3.86086e-07	WJ201-13	0	0.942	1.05312
DDGQLFHIDFGHFLDHK	PIK3CA	003_MSC292_PRM_D22.raw	135485	375365763072	3.60941e-07	WJ201-13	0	0.9599	0.984531
DDGQLFHIDFGHFLDHK	PIK3CA	004_MSC292_PRM_D22.raw	3735	367054553088	1.01756e-08	WJ201-13	100	0.3772	0.0277558
DDGQLFHIDFGHFLDHK	PIK3CA	005_MSC292_PRM_D22.raw	8618	336322068480	2.56242e-08	WJ201-13	100	0.5046	0.0698947
DDGQLFHIDFGHFLDHK	PIK3CA	006_MSC292_PRM_D22.raw	0	378640007168	0	WJ201-13	100	0	0
DDGQLFHIDFGHFLDHK	PIK3CA	007_MSC292_PRM_D22.raw	60801	400295821312	1.5189e-07	WJ201-13	10	0.7597	0.414307
DDGQLFHIDFGHFLDHK	PIK3CA	008_MSC292_PRM_D22.raw	61819	381586702336	1.62005e-07	WJ201-13	10	0.9049	0.441898
DDGQLFHIDFGHFLDHK	PIK3CA	009_MSC292_PRM_D22.raw	67810	357919522816	1.89456e-07	WJ201-13	10	0.7787	0.516775
DDGQLFHIDFGHFLDHK	PIK3CA	010_MSC292_PRM_D22.raw	122064	388651122688	3.14071e-07	WJ201-13	1	0.9184	0.856684
DDGQLFHIDFGHFLDHK	PIK3CA	011_MSC292_PRM_D22.raw	117925	400786063360	2.94234e-07	WJ201-13	1	0.9156	0.802576
DDGQLFHIDFGHFLDHK	PIK3CA	012_MSC292_PRM_D22.raw	120842	386939125760	3.12302e-07	WJ201-13	1	0.9325	0.85186
MDWIFHTIK	PIK3CA	001_MSC292_PRM_D22.raw	131598	319390449664	4.12029e-07	WJ201-13	0	0.9607	0.977089
MDWIFHTIK	PIK3CA	002_MSC292_PRM_D22.raw	170183	351230066688	4.84534e-07	WJ201-13	0	0.9936	1.14903
MDWIFHTIK	PIK3CA	003_MSC292_PRM_D22.raw	138325	375365763072	3.68507e-07	WJ201-13	0	0.9567	0.873882
MDWIFHTIK	PIK3CA	004_MSC292_PRM_D22.raw	13904	367054553088	3.78799e-08	WJ201-13	100	0.5359	0.0898288
MDWIFHTIK	PIK3CA	005_MSC292_PRM_D22.raw	14897	336322068480	4.42939e-08	WJ201-13	100	0.7165	0.105039
MDWIFHTIK	PIK3CA	006_MSC292_PRM_D22.raw	8928	378640007168	2.35791e-08	WJ201-13	100	0.5475	0.0559158
MDWIFHTIK	PIK3CA	007_MSC292_PRM_D22.raw	65726	400295821312	1.64194e-07	WJ201-13	10	0.9652	0.38937
MDWIFHTIK	PIK3CA	008_MSC292_PRM_D22.raw	73187	381586702336	1.91797e-07	WJ201-13	10	0.9663	0.454828
MDWIFHTIK	PIK3CA	009_MSC292_PRM_D22.raw	72818	357919522816	2.03448e-07	WJ201-13	10	0.9591	0.482459
MDWIFHTIK	PIK3CA	010_MSC292_PRM_D22.raw	131144	388651122688	3.37434e-07	WJ201-13	1	0.9602	0.800194
MDWIFHTIK	PIK3CA	011_MSC292_PRM_D22.raw	135996	400786063360	3.39323e-07	WJ201-13	1	0.9761	0.804674
MDWIFHTIK	PIK3CA	012_MSC292_PRM_D22.raw	121977	386939125760	3.15236e-07	WJ201-13	1	0.9581	0.747553
DLNSPHSR	PIK3CA	001_MSC351_PRM_rr_D23.raw	39771	145432166400	2.73468e-07	WJ200-12	0	0.7598	0.841347
DLNSPHSR	PIK3CA	002_MSC351_PRM_rr_D23.raw	43931	142938210304	3.07343e-07	WJ200-12	0	0.7554	0.945567
DLNSPHSR	PIK3CA	003_MSC351_PRM_rr_D23.raw	72985	185102123008	3.94296e-07	WJ200-12	0	0.8206	1.21309
DLNSPHSR	PIK3CA	016_MSC351_PRM_rr_D23.raw	24228	191146721280	1.26751e-07	WJ200-12	1000	0.7567	0.38996
DLNSPHSR	PIK3CA	017_MSC351_PRM_rr_D23.raw	36276	217256116224	1.66973e-07	WJ200-12	1000	0.7111	0.513708
DLNSPHSR	PIK3CA	018_MSC351_PRM_rr_D23.raw	59057	220602925056	2.67707e-07	WJ200-12	1000	0.7582	0.823625
DLNSPHSR	PIK3CA	019_MSC351_PRM_rr_D23.raw	62313	224932495360	2.7703e-07	WJ200-12	100	0.6147	0.852307
DLNSPHSR	PIK3CA	020_MSC351_PRM_rr_D23.raw	36235	212186578944	1.7077e-07	WJ200-12	100	0.7552	0.525387
DLNSPHSR	PIK3CA	021_MSC351_PRM_rr_D23.raw	24113	267974606848	8.99824e-08	WJ200-12	100	0.7596	0.276839
DLNSPHSR	PIK3CA	022_MSC351_PRM_rr_D23.raw	37796	361627746304	1.04516e-07	WJ200-12	10	0.7089	0.321554
DLNSPHSR	PIK3CA	023_MSC351_PRM_rr_D23.raw	69416	322343763968	2.15348e-07	WJ200-12	10	0.7577	0.662536
DLNSPHSR	PIK3CA	024_MSC351_PRM_rr_D23.raw	16791	302207991808	5.55611e-08	WJ200-12	10	0.4792	0.170939
DLNSPHSR	PIK3CA	025_MSC351_PRM_rr_D23.raw	31993	287567151104	1.11254e-07	WJ200-12	1	0.7361	0.342283
DLNSPHSR	PIK3CA	026_MSC351_PRM_rr_D23.raw	129432	300883050496	4.30174e-07	WJ200-12	1	0.7512	1.32347
DLNSPHSR	PIK3CA	027_MSC351_PRM_rr_D23.raw	108028	381354672128	2.83274e-07	WJ200-12	1	0.7548	0.871519
LINLTDILK	PIK3CA	001_MSC351_PRM_rr_D23.raw	309365	145432166400	2.12721e-06	WJ200-12	0	0.8683	0.858257
LINLTDILK	PIK3CA	002_MSC351_PRM_rr_D23.raw	330598	142938210304	2.31287e-06	WJ200-12	0	0.9065	0.933165
LINLTDILK	PIK3CA	003_MSC351_PRM_rr_D23.raw	554472	185102123008	2.99549e-06	WJ200-12	0	0.9069	1.20858
LINLTDILK	PIK3CA	016_MSC351_PRM_rr_D23.raw	331662	191146721280	1.73512e-06	WJ200-12	1000	0.8845	0.70006
LINLTDILK	PIK3CA	017_MSC351_PRM_rr_D23.raw	323912	217256116224	1.49092e-06	WJ200-12	1000	0.8817	0.601536
LINLTDILK	PIK3CA	018_MSC351_PRM_rr_D23.raw	310704	220602925056	1.40843e-06	WJ200-12	1000	0.8967	0.568254
LINLTDILK	PIK3CA	019_MSC351_PRM_rr_D23.raw	256832	224932495360	1.14182e-06	WJ200-12	100	0.8832	0.460684
LINLTDILK	PIK3CA	020_MSC351_PRM_rr_D23.raw	210337	212186578944	9.91283e-07	WJ200-12	100	0.865	0.399949
LINLTDILK	PIK3CA	021_MSC351_PRM_rr_D23.raw	472881	267974606848	1.76465e-06	WJ200-12	100	0.89	0.711975
LINLTDILK	PIK3CA	022_MSC351_PRM_rr_D23.raw	497248	361627746304	1.37503e-06	WJ200-12	10	0.8796	0.554776
LINLTDILK	PIK3CA	023_MSC351_PRM_rr_D23.raw	661354	322343763968	2.0517e-06	WJ200-12	10	0.9052	0.827792
LINLTDILK	PIK3CA	024_MSC351_PRM_rr_D23.raw	754741	302207991808	2.49742e-06	WJ200-12	10	0.8957	1.00762
LINLTDILK	PIK3CA	025_MSC351_PRM_rr_D23.raw	835882	287567151104	2.90674e-06	WJ200-12	1	0.8912	1.17277
LINLTDILK	PIK3CA	026_MSC351_PRM_rr_D23.raw	679483	300883050496	2.2583e-06	WJ200-12	1	0.8943	0.911145
LINLTDILK	PIK3CA	027_MSC351_PRM_rr_D23.raw	1044837	381354672128	2.7398e-06	WJ200-12	1	0.8956	1.10542
IMENIWQNQGLDLR	PIK3CA	001_MSC351_PRM_rr_D23.raw	52150	145432166400	3.58586e-07	WJ200-12	0	NA	0.295551
IMENIWQNQGLDLR	PIK3CA	002_MSC351_PRM_rr_D23.raw	92158	142938210304	6.4474e-07	WJ200-12	0	NA	0.531402
IMENIWQNQGLDLR	PIK3CA	003_MSC351_PRM_rr_D23.raw	488025	185102123008	2.63652e-06	WJ200-12	0	NA	2.17305
IMENIWQNQGLDLR	PIK3CA	016_MSC351_PRM_rr_D23.raw	290898	191146721280	1.52186e-06	WJ200-12	1000	NA	1.25433
IMENIWQNQGLDLR	PIK3CA	017_MSC351_PRM_rr_D23.raw	140201	217256116224	6.45326e-07	WJ200-12	1000	NA	0.531885
IMENIWQNQGLDLR	PIK3CA	018_MSC351_PRM_rr_D23.raw	149475	220602925056	6.77575e-07	WJ200-12	1000	NA	0.558465
IMENIWQNQGLDLR	PIK3CA	019_MSC351_PRM_rr_D23.raw	147372	224932495360	6.55183e-07	WJ200-12	100	NA	0.540009
IMENIWQNQGLDLR	PIK3CA	020_MSC351_PRM_rr_D23.raw	105546	212186578944	4.97421e-07	WJ200-12	100	NA	0.40998
IMENIWQNQGLDLR	PIK3CA	021_MSC351_PRM_rr_D23.raw	199460	267974606848	7.44324e-07	WJ200-12	100	NA	0.61348
IMENIWQNQGLDLR	PIK3CA	022_MSC351_PRM_rr_D23.raw	660608	361627746304	1.82676e-06	WJ200-12	10	NA	1.50564
IMENIWQNQGLDLR	PIK3CA	023_MSC351_PRM_rr_D23.raw	48068	322343763968	1.4912e-07	WJ200-12	10	NA	0.122907
IMENIWQNQGLDLR	PIK3CA	024_MSC351_PRM_rr_D23.raw	189744	302207991808	6.27859e-07	WJ200-12	10	NA	0.517488
IMENIWQNQGLDLR	PIK3CA	025_MSC351_PRM_rr_D23.raw	203952	287567151104	7.09233e-07	WJ200-12	1	NA	0.584557
IMENIWQNQGLDLR	PIK3CA	026_MSC351_PRM_rr_D23.raw	155856	300883050496	5.17995e-07	WJ200-12	1	NA	0.426937
IMENIWQNQGLDLR	PIK3CA	027_MSC351_PRM_rr_D23.raw	146942	381354672128	3.85316e-07	WJ200-12	1	NA	0.317582
DDGQLFHIDFGHFLDHK	PIK3CA	001_MSC351_PRM_rr_D23.raw	16260	145432166400	1.11805e-07	WJ200-12	0	0.5878	0.75116
DDGQLFHIDFGHFLDHK	PIK3CA	002_MSC351_PRM_rr_D23.raw	20364	142938210304	1.42467e-07	WJ200-12	0	0.6158	0.957166
DDGQLFHIDFGHFLDHK	PIK3CA	003_MSC351_PRM_rr_D23.raw	35587	185102123008	1.92256e-07	WJ200-12	0	0.7574	1.29167
DDGQLFHIDFGHFLDHK	PIK3CA	016_MSC351_PRM_rr_D23.raw	23270	191146721280	1.21739e-07	WJ200-12	1000	0.6463	0.817904
DDGQLFHIDFGHFLDHK	PIK3CA	017_MSC351_PRM_rr_D23.raw	14240	217256116224	6.55448e-08	WJ200-12	1000	0.4933	0.440363
DDGQLFHIDFGHFLDHK	PIK3CA	018_MSC351_PRM_rr_D23.raw	5021	220602925056	2.27604e-08	WJ200-12	1000	0.3772	0.152916
DDGQLFHIDFGHFLDHK	PIK3CA	019_MSC351_PRM_rr_D23.raw	20573	224932495360	9.1463e-08	WJ200-12	100	0.587	0.614495
DDGQLFHIDFGHFLDHK	PIK3CA	020_MSC351_PRM_rr_D23.raw	7169	212186578944	3.37863e-08	WJ200-12	100	0.4511	0.226993
DDGQLFHIDFGHFLDHK	PIK3CA	021_MSC351_PRM_rr_D23.raw	39517	267974606848	1.47465e-07	WJ200-12	100	0.7308	0.990748
DDGQLFHIDFGHFLDHK	PIK3CA	022_MSC351_PRM_rr_D23.raw	31700	361627746304	8.76592e-08	WJ200-12	10	0.8571	0.588939
DDGQLFHIDFGHFLDHK	PIK3CA	023_MSC351_PRM_rr_D23.raw	59111	322343763968	1.83379e-07	WJ200-12	10	0.9226	1.23203
DDGQLFHIDFGHFLDHK	PIK3CA	024_MSC351_PRM_rr_D23.raw	39729	302207991808	1.31462e-07	WJ200-12	10	0.7815	0.883231
DDGQLFHIDFGHFLDHK	PIK3CA	025_MSC351_PRM_rr_D23.raw	14451	287567151104	5.02526e-08	WJ200-12	1	0.5711	0.337622
DDGQLFHIDFGHFLDHK	PIK3CA	026_MSC351_PRM_rr_D23.raw	22935	300883050496	7.62256e-08	WJ200-12	1	0.5987	0.512122
DDGQLFHIDFGHFLDHK	PIK3CA	027_MSC351_PRM_rr_D23.raw	34301	381354672128	8.99451e-08	WJ200-12	1	0.7778	0.604297
MDWIFHTIK	PIK3CA	001_MSC351_PRM_rr_D23.raw	31642	145432166400	2.17572e-07	WJ200-12	0	0.7009	0.942091
MDWIFHTIK	PIK3CA	002_MSC351_PRM_rr_D23.raw	25011	142938210304	1.74978e-07	WJ200-12	0	0.881	0.757656
MDWIFHTIK	PIK3CA	003_MSC351_PRM_rr_D23.raw	55584	185102123008	3.00288e-07	WJ200-12	0	0.9711	1.30025
MDWIFHTIK	PIK3CA	016_MSC351_PRM_rr_D23.raw	27465	191146721280	1.43685e-07	WJ200-12	1000	0.6501	0.62216
MDWIFHTIK	PIK3CA	017_MSC351_PRM_rr_D23.raw	41116	217256116224	1.89251e-07	WJ200-12	1000	0.9399	0.819461
MDWIFHTIK	PIK3CA	018_MSC351_PRM_rr_D23.raw	50157	220602925056	2.27363e-07	WJ200-12	1000	0.939	0.984486
MDWIFHTIK	PIK3CA	019_MSC351_PRM_rr_D23.raw	42824	224932495360	1.90386e-07	WJ200-12	100	0.9422	0.824374
MDWIFHTIK	PIK3CA	020_MSC351_PRM_rr_D23.raw	29176	212186578944	1.37502e-07	WJ200-12	100	0.9628	0.595384
MDWIFHTIK	PIK3CA	021_MSC351_PRM_rr_D23.raw	35083	267974606848	1.30919e-07	WJ200-12	100	0.8644	0.566882
MDWIFHTIK	PIK3CA	022_MSC351_PRM_rr_D23.raw	43996	361627746304	1.21661e-07	WJ200-12	10	0.8538	0.526794
MDWIFHTIK	PIK3CA	023_MSC351_PRM_rr_D23.raw	73277	322343763968	2.27326e-07	WJ200-12	10	0.947	0.984323
MDWIFHTIK	PIK3CA	024_MSC351_PRM_rr_D23.raw	66915	302207991808	2.2142e-07	WJ200-12	10	0.9699	0.958753
MDWIFHTIK	PIK3CA	025_MSC351_PRM_rr_D23.raw	73498	287567151104	2.55586e-07	WJ200-12	1	0.9322	1.10669
MDWIFHTIK	PIK3CA	026_MSC351_PRM_rr_D23.raw	93082	300883050496	3.09363e-07	WJ200-12	1	0.9698	1.33955
MDWIFHTIK	PIK3CA	027_MSC351_PRM_rr_D23.raw	100474	381354672128	2.63466e-07	WJ200-12	1	0.9606	1.14081
DLNSPHSR	PIK3CA	001_MSC349_PRM_r_D23.raw	67333	234732617728	2.8685e-07	WJ117-16	0	0.7289	0.913385
DLNSPHSR	PIK3CA	002_MSC349_PRM_r_D23.raw	89722	228691574784	3.92328e-07	WJ117-16	0	0.7481	1.24925
DLNSPHSR	PIK3CA	003_MSC349_PRM_r_D23.raw	79418	301996474368	2.62977e-07	WJ117-16	0	0.7185	0.837368
DLNSPHSR	PIK3CA	016_MSC349_PRM_r_D23.raw	86441	227307044864	3.80283e-07	WJ117-16	10000	0.7258	1.21089
DLNSPHSR	PIK3CA	017_MSC349_PRM_r_D23.raw	67473	238944960512	2.82379e-07	WJ117-16	10000	0.7546	0.899149
DLNSPHSR	PIK3CA	018_MSC349_PRM_r_D23.raw	89637	264316026880	3.39128e-07	WJ117-16	10000	0.7521	1.07985
DLNSPHSR	PIK3CA	019_MSC349_PRM_r_D23.raw	82121	274307579904	2.99376e-07	WJ117-16	1000	0.7588	0.95327
DLNSPHSR	PIK3CA	020_MSC349_PRM_r_D23.raw	115230	365284229120	3.15453e-07	WJ117-16	1000	0.7362	1.00446
DLNSPHSR	PIK3CA	021_MSC349_PRM_r_D23.raw	98740	323193667584	3.05513e-07	WJ117-16	1000	0.7405	0.972814
DLNSPHSR	PIK3CA	022_MSC349_PRM_r_D23.raw	86535	294620758016	2.93717e-07	WJ117-16	100	0.7173	0.93525
DLNSPHSR	PIK3CA	023_MSC349_PRM_r_D23.raw	105257	403563610112	2.60819e-07	WJ117-16	100	0.751	0.830498
DLNSPHSR	PIK3CA	024_MSC349_PRM_r_D23.raw	113340	331717935104	3.41676e-07	WJ117-16	100	0.7311	1.08796
DLNSPHSR	PIK3CA	025_MSC349_PRM_r_D23.raw	80400	228084514816	3.52501e-07	WJ117-16	10	0.7261	1.12243
DLNSPHSR	PIK3CA	026_MSC349_PRM_r_D23.raw	114747	354685550592	3.23518e-07	WJ117-16	10	0.7329	1.03014
DLNSPHSR	PIK3CA	027_MSC349_PRM_r_D23.raw	123478	366914961408	3.3653e-07	WJ117-16	10	0.7894	1.07158
LINLTDILK	PIK3CA	001_MSC349_PRM_r_D23.raw	177108	234732617728	7.5451e-07	WJ117-16	0	0.9038	1.56485
LINLTDILK	PIK3CA	002_MSC349_PRM_r_D23.raw	100226	228691574784	4.38258e-07	WJ117-16	0	0.9131	0.908944
LINLTDILK	PIK3CA	003_MSC349_PRM_r_D23.raw	76622	301996474368	2.53718e-07	WJ117-16	0	0.9035	0.526209
LINLTDILK	PIK3CA	016_MSC349_PRM_r_D23.raw	90174	227307044864	3.96706e-07	WJ117-16	10000	0.8081	0.822764
LINLTDILK	PIK3CA	017_MSC349_PRM_r_D23.raw	110639	238944960512	4.63031e-07	WJ117-16	10000	0.9331	0.960323
LINLTDILK	PIK3CA	018_MSC349_PRM_r_D23.raw	225631	264316026880	8.53641e-07	WJ117-16	10000	0.8891	1.77044
LINLTDILK	PIK3CA	019_MSC349_PRM_r_D23.raw	57945	274307579904	2.11241e-07	WJ117-16	1000	0.9167	0.438112
LINLTDILK	PIK3CA	020_MSC349_PRM_r_D23.raw	106241	365284229120	2.90845e-07	WJ117-16	1000	0.8172	0.60321
LINLTDILK	PIK3CA	021_MSC349_PRM_r_D23.raw	50620	323193667584	1.56624e-07	WJ117-16	1000	0.7868	0.324838
LINLTDILK	PIK3CA	022_MSC349_PRM_r_D23.raw	131603	294620758016	4.46686e-07	WJ117-16	100	0.9171	0.926423
LINLTDILK	PIK3CA	023_MSC349_PRM_r_D23.raw	74552	403563610112	1.84734e-07	WJ117-16	100	0.849	0.383137
LINLTDILK	PIK3CA	024_MSC349_PRM_r_D23.raw	75929	331717935104	2.28896e-07	WJ117-16	100	0.872	0.474729
LINLTDILK	PIK3CA	025_MSC349_PRM_r_D23.raw	52150	228084514816	2.28643e-07	WJ117-16	10	0.7756	0.474204
LINLTDILK	PIK3CA	026_MSC349_PRM_r_D23.raw	150678	354685550592	4.24821e-07	WJ117-16	10	0.907	0.881076
LINLTDILK	PIK3CA	027_MSC349_PRM_r_D23.raw	71790	366914961408	1.95658e-07	WJ117-16	10	0.9176	0.405794
IMENIWQNQGLDLR	PIK3CA	001_MSC349_PRM_r_D23.raw	204842	234732617728	8.72661e-07	WJ117-16	0	NA	1.18849
IMENIWQNQGLDLR	PIK3CA	002_MSC349_PRM_r_D23.raw	78639	228691574784	3.43865e-07	WJ117-16	0	NA	0.468316
IMENIWQNQGLDLR	PIK3CA	003_MSC349_PRM_r_D23.raw	297843	301996474368	9.86247e-07	WJ117-16	0	NA	1.34319
IMENIWQNQGLDLR	PIK3CA	016_MSC349_PRM_r_D23.raw	40153	227307044864	1.76647e-07	WJ117-16	10000	NA	0.240578
IMENIWQNQGLDLR	PIK3CA	017_MSC349_PRM_r_D23.raw	48725	238944960512	2.03917e-07	WJ117-16	10000	NA	0.277719
IMENIWQNQGLDLR	PIK3CA	018_MSC349_PRM_r_D23.raw	219962	264316026880	8.32193e-07	WJ117-16	10000	NA	1.13338
IMENIWQNQGLDLR	PIK3CA	019_MSC349_PRM_r_D23.raw	32194	274307579904	1.17365e-07	WJ117-16	1000	NA	0.159841
IMENIWQNQGLDLR	PIK3CA	020_MSC349_PRM_r_D23.raw	77876	365284229120	2.13193e-07	WJ117-16	1000	NA	0.290352
IMENIWQNQGLDLR	PIK3CA	021_MSC349_PRM_r_D23.raw	36254	323193667584	1.12174e-07	WJ117-16	1000	NA	0.152772
IMENIWQNQGLDLR	PIK3CA	022_MSC349_PRM_r_D23.raw	49146	294620758016	1.66811e-07	WJ117-16	100	NA	0.227183
IMENIWQNQGLDLR	PIK3CA	023_MSC349_PRM_r_D23.raw	62895	403563610112	1.55849e-07	WJ117-16	100	NA	0.212254
IMENIWQNQGLDLR	PIK3CA	024_MSC349_PRM_r_D23.raw	43271	331717935104	1.30445e-07	WJ117-16	100	NA	0.177656
IMENIWQNQGLDLR	PIK3CA	025_MSC349_PRM_r_D23.raw	15883	228084514816	6.96365e-08	WJ117-16	10	NA	0.0948393
IMENIWQNQGLDLR	PIK3CA	026_MSC349_PRM_r_D23.raw	355908	354685550592	1.00345e-06	WJ117-16	10	NA	1.36661
IMENIWQNQGLDLR	PIK3CA	027_MSC349_PRM_r_D23.raw	36471	366914961408	9.93991e-08	WJ117-16	10	NA	0.135374
DDGQLFHIDFGHFLDHK	PIK3CA	001_MSC349_PRM_r_D23.raw	1230	234732617728	5.24e-09	WJ117-16	0	0.2632	0.214373
DDGQLFHIDFGHFLDHK	PIK3CA	002_MSC349_PRM_r_D23.raw	10891	228691574784	4.76231e-08	WJ117-16	0	0.3361	1.9483
DDGQLFHIDFGHFLDHK	PIK3CA	003_MSC349_PRM_r_D23.raw	6181	301996474368	2.04671e-08	WJ117-16	0	0.5113	0.837327
DDGQLFHIDFGHFLDHK	PIK3CA	016_MSC349_PRM_r_D23.raw	0	227307044864	0	WJ117-16	10000	0	0
DDGQLFHIDFGHFLDHK	PIK3CA	017_MSC349_PRM_r_D23.raw	2315	238944960512	9.68842e-09	WJ117-16	10000	0.2998	0.396361
DDGQLFHIDFGHFLDHK	PIK3CA	018_MSC349_PRM_r_D23.raw	8615	264316026880	3.25936e-08	WJ117-16	10000	0.5822	1.33343
DDGQLFHIDFGHFLDHK	PIK3CA	019_MSC349_PRM_r_D23.raw	2369	274307579904	8.63629e-09	WJ117-16	1000	0.2998	0.353318
DDGQLFHIDFGHFLDHK	PIK3CA	020_MSC349_PRM_r_D23.raw	3435	365284229120	9.40364e-09	WJ117-16	1000	0.3772	0.384711
DDGQLFHIDFGHFLDHK	PIK3CA	021_MSC349_PRM_r_D23.raw	2619	323193667584	8.1035e-09	WJ117-16	1000	0.2998	0.331521
DDGQLFHIDFGHFLDHK	PIK3CA	022_MSC349_PRM_r_D23.raw	10904	294620758016	3.70103e-08	WJ117-16	100	0.3431	1.51412
DDGQLFHIDFGHFLDHK	PIK3CA	023_MSC349_PRM_r_D23.raw	2238	403563610112	5.54559e-09	WJ117-16	100	0.3772	0.226875
DDGQLFHIDFGHFLDHK	PIK3CA	024_MSC349_PRM_r_D23.raw	6434	331717935104	1.9396e-08	WJ117-16	100	0.5112	0.793506
DDGQLFHIDFGHFLDHK	PIK3CA	025_MSC349_PRM_r_D23.raw	2708	228084514816	1.18728e-08	WJ117-16	10	0.2998	0.485726
DDGQLFHIDFGHFLDHK	PIK3CA	026_MSC349_PRM_r_D23.raw	3872	354685550592	1.09167e-08	WJ117-16	10	0.3772	0.446612
DDGQLFHIDFGHFLDHK	PIK3CA	027_MSC349_PRM_r_D23.raw	2692	366914961408	7.33685e-09	WJ117-16	10	0.2998	0.300157
MDWIFHTIK	PIK3CA	001_MSC349_PRM_r_D23.raw	2494	234732617728	1.06249e-08	WJ117-16	0	0.3688	0.252721
MDWIFHTIK	PIK3CA	002_MSC349_PRM_r_D23.raw	11736	228691574784	5.1318e-08	WJ117-16	0	0.5209	1.22064
MDWIFHTIK	PIK3CA	003_MSC349_PRM_r_D23.raw	19383	301996474368	6.41829e-08	WJ117-16	0	0.6996	1.52664
MDWIFHTIK	PIK3CA	016_MSC349_PRM_r_D23.raw	13703	227307044864	6.02841e-08	WJ117-16	10000	0.6557	1.4339
MDWIFHTIK	PIK3CA	017_MSC349_PRM_r_D23.raw	24761	238944960512	1.03626e-07	WJ117-16	10000	0.8272	2.46483
MDWIFHTIK	PIK3CA	018_MSC349_PRM_r_D23.raw	27456	264316026880	1.03876e-07	WJ117-16	10000	0.9437	2.47076
MDWIFHTIK	PIK3CA	019_MSC349_PRM_r_D23.raw	9574	274307579904	3.49024e-08	WJ117-16	1000	0.7321	0.830182
MDWIFHTIK	PIK3CA	020_MSC349_PRM_r_D23.raw	38129	365284229120	1.04382e-07	WJ117-16	1000	0.7224	2.4828
MDWIFHTIK	PIK3CA	021_MSC349_PRM_r_D23.raw	17130	323193667584	5.30023e-08	WJ117-16	1000	0.8351	1.2607
MDWIFHTIK	PIK3CA	022_MSC349_PRM_r_D23.raw	18067	294620758016	6.13229e-08	WJ117-16	100	0.729	1.45861
MDWIFHTIK	PIK3CA	023_MSC349_PRM_r_D23.raw	38001	403563610112	9.41636e-08	WJ117-16	100	0.6804	2.23976
MDWIFHTIK	PIK3CA	024_MSC349_PRM_r_D23.raw	41582	331717935104	1.25353e-07	WJ117-16	100	0.8965	2.98163
MDWIFHTIK	PIK3CA	025_MSC349_PRM_r_D23.raw	10360	228084514816	4.54218e-08	WJ117-16	10	0.3688	1.08039
MDWIFHTIK	PIK3CA	026_MSC349_PRM_r_D23.raw	35596	354685550592	1.00359e-07	WJ117-16	10	0.7178	2.38713
MDWIFHTIK	PIK3CA	027_MSC349_PRM_r_D23.raw	50823	366914961408	1.38514e-07	WJ117-16	10	0.7195	3.29467
DLNSPHSR	PIK3CA	001_MSC343_PRM_D23.raw	55214	214292742144	2.57657e-07	WJ112-14-Me	0	0.7365	1.54962
DLNSPHSR	PIK3CA	002_MSC343_PRM_D23.raw	26891	193378598912	1.39059e-07	WJ112-14-Me	0	0.6145	0.83634
DLNSPHSR	PIK3CA	003_MSC343_PRM_D23.raw	18373	179957153792	1.02097e-07	WJ112-14-Me	0	0.6683	0.614038
DLNSPHSR	PIK3CA	004_MSC343_PRM_D23.raw	68611	275999817728	2.48591e-07	WJ112-14-Me	10000	0.7559	1.4951
DLNSPHSR	PIK3CA	005_MSC343_PRM_D23.raw	77682	255706333184	3.03794e-07	WJ112-14-Me	10000	0.8007	1.8271
DLNSPHSR	PIK3CA	006_MSC343_PRM_D23.raw	19581	163584475136	1.197e-07	WJ112-14-Me	10000	0.4792	0.719908
DLNSPHSR	PIK3CA	007_MSC343_PRM_D23.raw	81786	241855430656	3.38161e-07	WJ112-14-Me	1000	0.7188	2.0338
DLNSPHSR	PIK3CA	008_MSC343_PRM_D23.raw	67106	238651277312	2.81189e-07	WJ112-14-Me	1000	0.7414	1.69115
DLNSPHSR	PIK3CA	009_MSC343_PRM_D23.raw	71104	239189868544	2.9727e-07	WJ112-14-Me	1000	0.7231	1.78787
DLNSPHSR	PIK3CA	010_MSC343_PRM_D23.raw	69299	272763600896	2.54062e-07	WJ112-14-Me	100	0.6964	1.528
DLNSPHSR	PIK3CA	011_MSC343_PRM_D23.raw	54610	278218309632	1.96285e-07	WJ112-14-Me	100	0.7399	1.18051
DLNSPHSR	PIK3CA	012_MSC343_PRM_D23.raw	78083	196327243776	3.97719e-07	WJ112-14-Me	100	0.7539	2.39199
DLNSPHSR	PIK3CA	013_MSC343_PRM_D23.raw	71465	295330185216	2.41983e-07	WJ112-14-Me	10	0.7173	1.45536
DLNSPHSR	PIK3CA	014_MSC343_PRM_D23.raw	65056	256729694208	2.53403e-07	WJ112-14-Me	10	0.6555	1.52404
DLNSPHSR	PIK3CA	015_MSC343_PRM_D23.raw	78924	285127507968	2.76802e-07	WJ112-14-Me	10	0.7293	1.66477
DLNSPHSR	PIK3CA	016_MSC343_PRM_D23.raw	30342	280733253632	1.08081e-07	WJ112-14-Me	1	0.676	0.650032
DLNSPHSR	PIK3CA	017_MSC343_PRM_D23.raw	77321	225606402048	3.42725e-07	WJ112-14-Me	1	0.7481	2.06125
DLNSPHSR	PIK3CA	018_MSC343_PRM_D23.raw	143836	381490724864	3.77037e-07	WJ112-14-Me	1	0.7905	2.26761
DLNSPHSR	PIK3CA	019_MSC343_PRM_D23.raw	58057	357246304256	1.62513e-07	WJ112-14-Me	0.1	0.7093	0.977397
DLNSPHSR	PIK3CA	020_MSC343_PRM_D23.raw	107183	318857150464	3.36147e-07	WJ112-14-Me	0.1	0.7126	2.02169
DLNSPHSR	PIK3CA	021_MSC343_PRM_D23.raw	117866	369448976384	3.19032e-07	WJ112-14-Me	0.1	0.7479	1.91875
LINLTDILK	PIK3CA	001_MSC343_PRM_D23.raw	411573	214292742144	1.92061e-06	WJ112-14-Me	0	0.9166	0.994358
LINLTDILK	PIK3CA	002_MSC343_PRM_D23.raw	385459	193378598912	1.99329e-06	WJ112-14-Me	0	0.8995	1.03198
LINLTDILK	PIK3CA	003_MSC343_PRM_D23.raw	338432	179957153792	1.88063e-06	WJ112-14-Me	0	0.9227	0.973657
LINLTDILK	PIK3CA	004_MSC343_PRM_D23.raw	510125	275999817728	1.84828e-06	WJ112-14-Me	10000	0.9223	0.956911
LINLTDILK	PIK3CA	005_MSC343_PRM_D23.raw	496778	255706333184	1.94277e-06	WJ112-14-Me	10000	0.9205	1.00583
LINLTDILK	PIK3CA	006_MSC343_PRM_D23.raw	264663	163584475136	1.6179e-06	WJ112-14-Me	10000	0.9081	0.837635
LINLTDILK	PIK3CA	007_MSC343_PRM_D23.raw	424079	241855430656	1.75344e-06	WJ112-14-Me	1000	0.9339	0.907809
LINLTDILK	PIK3CA	008_MSC343_PRM_D23.raw	334136	238651277312	1.4001e-06	WJ112-14-Me	1000	0.9411	0.724875
LINLTDILK	PIK3CA	009_MSC343_PRM_D23.raw	353935	239189868544	1.47972e-06	WJ112-14-Me	1000	0.9301	0.766098
LINLTDILK	PIK3CA	010_MSC343_PRM_D23.raw	437648	272763600896	1.6045e-06	WJ112-14-Me	100	0.9403	0.830696
LINLTDILK	PIK3CA	011_MSC343_PRM_D23.raw	364277	278218309632	1.30932e-06	WJ112-14-Me	100	0.943	0.677875
LINLTDILK	PIK3CA	012_MSC343_PRM_D23.raw	300361	196327243776	1.5299e-06	WJ112-14-Me	100	0.9154	0.792075
LINLTDILK	PIK3CA	013_MSC343_PRM_D23.raw	477593	295330185216	1.61715e-06	WJ112-14-Me	10	0.9297	0.837247
LINLTDILK	PIK3CA	014_MSC343_PRM_D23.raw	365021	256729694208	1.42181e-06	WJ112-14-Me	10	0.9379	0.736114
LINLTDILK	PIK3CA	015_MSC343_PRM_D23.raw	473580	285127507968	1.66094e-06	WJ112-14-Me	10	0.9476	0.859919
LINLTDILK	PIK3CA	016_MSC343_PRM_D23.raw	686737	280733253632	2.44623e-06	WJ112-14-Me	1	0.9433	1.26649
LINLTDILK	PIK3CA	017_MSC343_PRM_D23.raw	413227	225606402048	1.83163e-06	WJ112-14-Me	1	0.9348	0.948289
LINLTDILK	PIK3CA	018_MSC343_PRM_D23.raw	572825	381490724864	1.50154e-06	WJ112-14-Me	1	0.945	0.777395
LINLTDILK	PIK3CA	019_MSC343_PRM_D23.raw	489485	357246304256	1.37016e-06	WJ112-14-Me	0.1	0.9599	0.709374
LINLTDILK	PIK3CA	020_MSC343_PRM_D23.raw	524240	318857150464	1.64412e-06	WJ112-14-Me	0.1	0.9386	0.851212
LINLTDILK	PIK3CA	021_MSC343_PRM_D23.raw	474879	369448976384	1.28537e-06	WJ112-14-Me	0.1	0.9463	0.665475
IMENIWQNQGLDLR	PIK3CA	001_MSC343_PRM_D23.raw	9522	214292742144	4.44345e-08	WJ112-14-Me	0	NA	0.0352066
IMENIWQNQGLDLR	PIK3CA	002_MSC343_PRM_D23.raw	172547	193378598912	8.92276e-07	WJ112-14-Me	0	NA	0.706972
IMENIWQNQGLDLR	PIK3CA	003_MSC343_PRM_D23.raw	512809	179957153792	2.84962e-06	WJ112-14-Me	0	NA	2.25782
IMENIWQNQGLDLR	PIK3CA	004_MSC343_PRM_D23.raw	67824	275999817728	2.45739e-07	WJ112-14-Me	10000	NA	0.194705
IMENIWQNQGLDLR	PIK3CA	005_MSC343_PRM_D23.raw	51238	255706333184	2.00378e-07	WJ112-14-Me	10000	NA	0.158765
IMENIWQNQGLDLR	PIK3CA	006_MSC343_PRM_D23.raw	54635	163584475136	3.33986e-07	WJ112-14-Me	10000	NA	0.264626
IMENIWQNQGLDLR	PIK3CA	007_MSC343_PRM_D23.raw	66408	241855430656	2.74577e-07	WJ112-14-Me	1000	NA	0.217554
IMENIWQNQGLDLR	PIK3CA	008_MSC343_PRM_D23.raw	366739	238651277312	1.53672e-06	WJ112-14-Me	1000	NA	1.21758
IMENIWQNQGLDLR	PIK3CA	009_MSC343_PRM_D23.raw	63554	239189868544	2.65705e-07	WJ112-14-Me	1000	NA	0.210525
IMENIWQNQGLDLR	PIK3CA	010_MSC343_PRM_D23.raw	52833	272763600896	1.93695e-07	WJ112-14-Me	100	NA	0.153469
IMENIWQNQGLDLR	PIK3CA	011_MSC343_PRM_D23.raw	135348	278218309632	4.86481e-07	WJ112-14-Me	100	NA	0.385451
IMENIWQNQGLDLR	PIK3CA	012_MSC343_PRM_D23.raw	34886	196327243776	1.77693e-07	WJ112-14-Me	100	NA	0.140791
IMENIWQNQGLDLR	PIK3CA	013_MSC343_PRM_D23.raw	69616	295330185216	2.35723e-07	WJ112-14-Me	10	NA	0.186769
IMENIWQNQGLDLR	PIK3CA	014_MSC343_PRM_D23.raw	12096	256729694208	4.71157e-08	WJ112-14-Me	10	NA	0.0373309
IMENIWQNQGLDLR	PIK3CA	015_MSC343_PRM_D23.raw	59057	285127507968	2.07125e-07	WJ112-14-Me	10	NA	0.16411
IMENIWQNQGLDLR	PIK3CA	016_MSC343_PRM_D23.raw	663926	280733253632	2.36497e-06	WJ112-14-Me	1	NA	1.87382
IMENIWQNQGLDLR	PIK3CA	017_MSC343_PRM_D23.raw	30682	225606402048	1.35998e-07	WJ112-14-Me	1	NA	0.107754
IMENIWQNQGLDLR	PIK3CA	018_MSC343_PRM_D23.raw	94315	381490724864	2.47228e-07	WJ112-14-Me	1	NA	0.195884
IMENIWQNQGLDLR	PIK3CA	019_MSC343_PRM_D23.raw	49457	357246304256	1.3844e-07	WJ112-14-Me	0.1	NA	0.109689
IMENIWQNQGLDLR	PIK3CA	020_MSC343_PRM_D23.raw	28661	318857150464	8.98866e-08	WJ112-14-Me	0.1	NA	0.0712194
IMENIWQNQGLDLR	PIK3CA	021_MSC343_PRM_D23.raw	892873	369448976384	2.41677e-06	WJ112-14-Me	0.1	NA	1.91487
DDGQLFHIDFGHFLDHK	PIK3CA	001_MSC343_PRM_D23.raw	4185	214292742144	1.95294e-08	WJ112-14-Me	0	0.3772	0.814894
DDGQLFHIDFGHFLDHK	PIK3CA	002_MSC343_PRM_D23.raw	4656	193378598912	2.40771e-08	WJ112-14-Me	0	0.5044	1.00466
DDGQLFHIDFGHFLDHK	PIK3CA	003_MSC343_PRM_D23.raw	5091	179957153792	2.82901e-08	WJ112-14-Me	0	0.3772	1.18045
DDGQLFHIDFGHFLDHK	PIK3CA	004_MSC343_PRM_D23.raw	8740	275999817728	3.16667e-08	WJ112-14-Me	10000	0.3772	1.32134
DDGQLFHIDFGHFLDHK	PIK3CA	005_MSC343_PRM_D23.raw	11887	255706333184	4.64869e-08	WJ112-14-Me	10000	0.5903	1.93974
DDGQLFHIDFGHFLDHK	PIK3CA	006_MSC343_PRM_D23.raw	0	163584475136	0	WJ112-14-Me	10000	0	0
DDGQLFHIDFGHFLDHK	PIK3CA	007_MSC343_PRM_D23.raw	4728	241855430656	1.95489e-08	WJ112-14-Me	1000	0.3772	0.815708
DDGQLFHIDFGHFLDHK	PIK3CA	008_MSC343_PRM_D23.raw	12307	238651277312	5.1569e-08	WJ112-14-Me	1000	0.5016	2.1518
DDGQLFHIDFGHFLDHK	PIK3CA	009_MSC343_PRM_D23.raw	0	239189868544	0	WJ112-14-Me	1000	0	0
DDGQLFHIDFGHFLDHK	PIK3CA	010_MSC343_PRM_D23.raw	0	272763600896	0	WJ112-14-Me	100	0	0
DDGQLFHIDFGHFLDHK	PIK3CA	011_MSC343_PRM_D23.raw	5625	278218309632	2.02179e-08	WJ112-14-Me	100	0.3772	0.843626
DDGQLFHIDFGHFLDHK	PIK3CA	012_MSC343_PRM_D23.raw	0	196327243776	0	WJ112-14-Me	100	0	0
DDGQLFHIDFGHFLDHK	PIK3CA	013_MSC343_PRM_D23.raw	13385	295330185216	4.53222e-08	WJ112-14-Me	10	0.484	1.89114
DDGQLFHIDFGHFLDHK	PIK3CA	014_MSC343_PRM_D23.raw	6180	256729694208	2.4072e-08	WJ112-14-Me	10	0.3772	1.00444
DDGQLFHIDFGHFLDHK	PIK3CA	015_MSC343_PRM_D23.raw	20598	285127507968	7.22414e-08	WJ112-14-Me	10	0.43	3.01439
DDGQLFHIDFGHFLDHK	PIK3CA	016_MSC343_PRM_D23.raw	37905	280733253632	1.35021e-07	WJ112-14-Me	1	0.7702	5.63399
DDGQLFHIDFGHFLDHK	PIK3CA	017_MSC343_PRM_D23.raw	5586	225606402048	2.47599e-08	WJ112-14-Me	1	0.3772	1.03315
DDGQLFHIDFGHFLDHK	PIK3CA	018_MSC343_PRM_D23.raw	32496	381490724864	8.51816e-08	WJ112-14-Me	1	0.5854	3.55434
DDGQLFHIDFGHFLDHK	PIK3CA	019_MSC343_PRM_D23.raw	12175	357246304256	3.40801e-08	WJ112-14-Me	0.1	0.5113	1.42205
DDGQLFHIDFGHFLDHK	PIK3CA	020_MSC343_PRM_D23.raw	12879	318857150464	4.03911e-08	WJ112-14-Me	0.1	0.5685	1.68539
DDGQLFHIDFGHFLDHK	PIK3CA	021_MSC343_PRM_D23.raw	6892	369448976384	1.86548e-08	WJ112-14-Me	0.1	0.3772	0.778402
MDWIFHTIK	PIK3CA	001_MSC343_PRM_D23.raw	8928	214292742144	4.16626e-08	WJ112-14-Me	0	0.3688	0.889952
MDWIFHTIK	PIK3CA	002_MSC343_PRM_D23.raw	13323	193378598912	6.88959e-08	WJ112-14-Me	0	0.5306	1.47168
MDWIFHTIK	PIK3CA	003_MSC343_PRM_D23.raw	5378	179957153792	2.98849e-08	WJ112-14-Me	0	0.3688	0.638368
MDWIFHTIK	PIK3CA	004_MSC343_PRM_D23.raw	8152	275999817728	2.95363e-08	WJ112-14-Me	10000	0.3688	0.630921
MDWIFHTIK	PIK3CA	005_MSC343_PRM_D23.raw	19867	255706333184	7.76946e-08	WJ112-14-Me	10000	0.5378	1.65963
MDWIFHTIK	PIK3CA	006_MSC343_PRM_D23.raw	0	163584475136	0	WJ112-14-Me	10000	0	0
MDWIFHTIK	PIK3CA	007_MSC343_PRM_D23.raw	15945	241855430656	6.59278e-08	WJ112-14-Me	1000	0.7217	1.40828
MDWIFHTIK	PIK3CA	008_MSC343_PRM_D23.raw	11472	238651277312	4.80701e-08	WJ112-14-Me	1000	0.5218	1.02682
MDWIFHTIK	PIK3CA	009_MSC343_PRM_D23.raw	11558	239189868544	4.83214e-08	WJ112-14-Me	1000	0.5323	1.03219
MDWIFHTIK	PIK3CA	010_MSC343_PRM_D23.raw	30065	272763600896	1.10224e-07	WJ112-14-Me	100	0.8301	2.35448
MDWIFHTIK	PIK3CA	011_MSC343_PRM_D23.raw	15807	278218309632	5.68151e-08	WJ112-14-Me	100	0.7086	1.21362
MDWIFHTIK	PIK3CA	012_MSC343_PRM_D23.raw	6444	196327243776	3.28227e-08	WJ112-14-Me	100	0.3688	0.701124
MDWIFHTIK	PIK3CA	013_MSC343_PRM_D23.raw	9427	295330185216	3.19202e-08	WJ112-14-Me	10	0.5455	0.681845
MDWIFHTIK	PIK3CA	014_MSC343_PRM_D23.raw	14888	256729694208	5.7991e-08	WJ112-14-Me	10	0.5182	1.23874
MDWIFHTIK	PIK3CA	015_MSC343_PRM_D23.raw	14813	285127507968	5.19522e-08	WJ112-14-Me	10	0.535	1.10975
MDWIFHTIK	PIK3CA	016_MSC343_PRM_D23.raw	22682	280733253632	8.07956e-08	WJ112-14-Me	1	0.6537	1.72587
MDWIFHTIK	PIK3CA	017_MSC343_PRM_D23.raw	15612	225606402048	6.92002e-08	WJ112-14-Me	1	0.5297	1.47818
MDWIFHTIK	PIK3CA	018_MSC343_PRM_D23.raw	27809	381490724864	7.28956e-08	WJ112-14-Me	1	0.7322	1.55712
MDWIFHTIK	PIK3CA	019_MSC343_PRM_D23.raw	24985	357246304256	6.99377e-08	WJ112-14-Me	0.1	0.7091	1.49393
MDWIFHTIK	PIK3CA	020_MSC343_PRM_D23.raw	13429	318857150464	4.2116e-08	WJ112-14-Me	0.1	0.5285	0.899637
MDWIFHTIK	PIK3CA	021_MSC343_PRM_D23.raw	0	369448976384	0	WJ112-14-Me	0.1	0	0
DLNSPHSR	PIK3CA	001_MSC265_PRM_D22.raw	120309	329739000000	3.64861e-07	WJ112-14	0	0.6324	0.460119
DLNSPHSR	PIK3CA	002_MSC265_PRM_D22.raw	211330	346081000000	6.10637e-07	WJ112-14	0	0.7094	0.770063
DLNSPHSR	PIK3CA	003_MSC265_PRM_D22.raw	449202	320078000000	1.40341e-06	WJ112-14	0	0.532	1.76982
DLNSPHSR	PIK3CA	004_MSC265_PRM_D22.raw	45977	321442000000	1.43034e-07	WJ112-14	10000	0.7467	0.180377
DLNSPHSR	PIK3CA	005_MSC265_PRM_D22.raw	243658	316740000000	7.69268e-07	WJ112-14	10000	0.629	0.970109
DLNSPHSR	PIK3CA	006_MSC265_PRM_D22.raw	53603	352840000000	1.51919e-07	WJ112-14	10000	0.7567	0.191582
DLNSPHSR	PIK3CA	007_MSC265_PRM_D22.raw	2791	354163000000	7.88055e-09	WJ112-14	1000	0.4792	0.00993801
DLNSPHSR	PIK3CA	008_MSC265_PRM_D22.raw	257305	394599000000	6.52067e-07	WJ112-14	1000	0.4792	0.822309
DLNSPHSR	PIK3CA	009_MSC265_PRM_20221129140155_D22.raw	0	343889000000	0	WJ112-14	1000	0	0
DLNSPHSR	PIK3CA	010_MSC265_PRM_D22.raw	3827	390091000000	9.81053e-09	WJ112-14	100	0.4792	0.0123719
DLNSPHSR	PIK3CA	011_MSC265_PRM_D22.raw	30751	351022000000	8.76042e-08	WJ112-14	100	0.4792	0.110476
DLNSPHSR	PIK3CA	012_MSC265_PRM_D22.raw	0	363676000000	0	WJ112-14	100	0	0
DLNSPHSR	PIK3CA	013_MSC265_PRM_D22.raw	356052	382997000000	9.29647e-07	WJ112-14	10	0.6083	1.17236
DLNSPHSR	PIK3CA	014_MSC265_PRM_D22.raw	50536	393147000000	1.28542e-07	WJ112-14	10	0.7542	0.162102
DLNSPHSR	PIK3CA	015_MSC265_PRM_D22.raw	59769	389705000000	1.5337e-07	WJ112-14	10	0.7594	0.193412
DLNSPHSR	PIK3CA	016_MSC265_PRM_D22.raw	64814	352813000000	1.83706e-07	WJ112-14	1	0.7491	0.231668
DLNSPHSR	PIK3CA	017_MSC265_PRM_D22.raw	248934	391611000000	6.35667e-07	WJ112-14	1	0.6998	0.801626
DLNSPHSR	PIK3CA	018_MSC265_PRM_D22.raw	82112	402983000000	2.0376e-07	WJ112-14	1	0.7544	0.256958
DLNSPHSR	PIK3CA	019_MSC265_PRM_D22.raw	436567	368870000000	1.18353e-06	WJ112-14	0.1	0.5921	1.49252
DLNSPHSR	PIK3CA	020_MSC265_PRM_D22.raw	79606	388246000000	2.0504e-07	WJ112-14	0.1	0.7581	0.258572
DLNSPHSR	PIK3CA	021_MSC265_PRM_D22.raw	69915	378765000000	1.84587e-07	WJ112-14	0.1	0.7541	0.232779
LINLTDILK	PIK3CA	001_MSC265_PRM_D22.raw	637875	329739000000	1.93448e-06	WJ112-14	0	0.8894	1.01188
LINLTDILK	PIK3CA	002_MSC265_PRM_D22.raw	607787	346081000000	1.7562e-06	WJ112-14	0	0.8984	0.918624
LINLTDILK	PIK3CA	003_MSC265_PRM_D22.raw	654440	320078000000	2.04463e-06	WJ112-14	0	0.9127	1.06949
LINLTDILK	PIK3CA	004_MSC265_PRM_D22.raw	389725	321442000000	1.21243e-06	WJ112-14	10000	0.8879	0.634191
LINLTDILK	PIK3CA	005_MSC265_PRM_D22.raw	380098	316740000000	1.20003e-06	WJ112-14	10000	0.9056	0.627707
LINLTDILK	PIK3CA	006_MSC265_PRM_D22.raw	373530	352840000000	1.05864e-06	WJ112-14	10000	0.9026	0.553748
LINLTDILK	PIK3CA	007_MSC265_PRM_D22.raw	87863	354163000000	2.48086e-07	WJ112-14	1000	0.774	0.129768
LINLTDILK	PIK3CA	008_MSC265_PRM_D22.raw	109647	394599000000	2.77869e-07	WJ112-14	1000	0.8168	0.145347
LINLTDILK	PIK3CA	009_MSC265_PRM_20221129140155_D22.raw	86213	343889000000	2.507e-07	WJ112-14	1000	0.8812	0.131135
LINLTDILK	PIK3CA	010_MSC265_PRM_D22.raw	118189	390091000000	3.02978e-07	WJ112-14	100	0.8837	0.15848
LINLTDILK	PIK3CA	011_MSC265_PRM_D22.raw	96498	351022000000	2.74906e-07	WJ112-14	100	0.8675	0.143797
LINLTDILK	PIK3CA	012_MSC265_PRM_D22.raw	124807	363676000000	3.43182e-07	WJ112-14	100	0.8918	0.17951
LINLTDILK	PIK3CA	013_MSC265_PRM_D22.raw	434652	382997000000	1.13487e-06	WJ112-14	10	0.8923	0.593623
[truncated: 3,620 more rows]
