# Supplementary material for: A high affinity pan-PI3K binding module supports selective targeted protein degradation of PI3Kα
Source: Royal Society of Chemistry journal article supplement (doi:10.1039/d3sc04629j), 2023-12-12
Supplement: d3sc04629j3.xlsx [file d3sc04629j3.xlsx]

## Sheet: TMT Data
Gene Name	Number of Peptides	-log2(Fold Change) WJ213-14	-log2(Fold Change) WJ112-14	-log2(Fold Change) WJ204-12	p-value WJ213-14	p-value WJ112-14	p-value WJ204-12	adj. p-value WJ213-14	adj. p-value WJ112-14	adj. p-value WJ204-12
A2M	3	0.270914	0.15837	0.0879309	0.063571	0.271438	0.631889	0.252137	0.678226	0.839685
AAAS	8	0.00363893	0.00912107	-0.0862568	0.909254	0.709663	0.216899	0.954463	0.90729	0.50573
AACS	8	-0.191308	-0.043373	0.0358723	0.0456822	0.438268	0.969451	0.227849	0.778798	0.990737
AAGAB	6	-0.229323	-0.139255	0.0279976	0.0478005	0.139425	0.922931	0.231231	0.562151	0.973364
AAK1	4	-0.488932	-0.128583	-0.11448	0.00889227	0.282696	0.290901	0.153991	0.682055	0.583923
AAMDC	7	0.0551225	0.0948171	0.090894	0.945417	0.180311	0.190602	0.972681	0.607819	0.476104
AAMP	7	-0.0361615	-0.0523213	-0.123119	0.492182	0.481642	0.127689	0.683502	0.801969	0.393588
AAR2	3	0.214931	0.0576396	0.00290956	0.02603	0.99772	0.859257	0.198798	1	0.950664
AARS1	47	-0.0464408	-0.026739	0.0229163	0.212715	0.545345	0.553732	0.4377	0.83585	0.792312
AARS2	18	0.12679	0.0420292	-0.0140726	0.0360999	0.341608	0.746373	0.214947	0.722402	0.902848
AARSD1	8	-0.110997	-0.06145	-0.042695	0.13703	0.22298	0.444365	0.349884	0.646234	0.719482
AASDHPPT	4	-0.172509	-0.0668973	-0.0734707	0.0361332	0.270512	0.189566	0.214947	0.678226	0.474746
AATF	7	0.161845	-0.113635	-0.114901	0.142886	0.222451	0.256435	0.358074	0.645537	0.551518
ABAT	23	0.0503727	0.152199	0.0560436	0.460003	0.187919	0.185518	0.655955	0.613848	0.470924
ABCA12	5	-0.0920389	-0.188765	-0.217609	0.136945	0.0392209	0.0343606	0.349784	0.430488	0.210312
ABCA2	21	0.145591	0.0578576	0.0252204	0.0371875	0.236591	0.42102	0.21644	0.653524	0.701487
ABCA3	7	0.273454	0.0713513	0.014501	0.0506346	0.400781	0.964809	0.23463	0.762139	0.988804
ABCB10	5	0.00629792	0.053019	0.0897897	0.764791	0.294948	0.0744001	0.868732	0.690785	0.307414
ABCB6	8	0.00132011	0.135547	-0.00123021	0.641282	0.196842	0.86457	0.787525	0.622654	0.952035
ABCB7	6	0.118532	0.0175612	-0.0542102	0.102416	0.871459	0.130476	0.306728	0.963329	0.39603
ABCB8	4	0.120708	0.0513969	0.0736637	0.105738	0.550089	0.224443	0.310619	0.83752	0.514596
ABCB9	2	0.165051	0.258949	0.00254571	0.562063	0.270239	0.609104	0.735358	0.678226	0.825639
ABCC1	11	0.148042	-0.0754555	-0.0725123	0.0961263	0.57328	0.806617	0.296926	0.849607	0.930057
ABCC5	13	-0.138724	-0.054745	0.0479515	0.249123	0.449622	0.20227	0.47589	0.784237	0.489927
ABCD1	4	-0.00925168	0.0125638	-0.0296092	0.92091	0.670732	0.639406	0.960549	0.888234	0.843963
ABCD3	12	0.215905	0.107471	0.17484	0.0337184	0.232965	0.114289	0.212761	0.651412	0.375632
ABCD4	3	0.0840752	0.118488	0.108883	0.174487	0.0260804	0.0470552	0.395089	0.407664	0.246113
ABCE1	17	-0.174846	-0.131561	-0.137947	0.0174597	0.110071	0.327029	0.174739	0.536516	0.618733
ABCF1	22	-0.158812	-0.0981926	-0.0333661	0.0166189	0.215223	0.54152	0.172773	0.63956	0.785854
ABCF2	18	-0.222697	-0.128367	-0.150678	0.000511769	0.00937446	0.00208923	0.0657281	0.344213	0.0541005
ABCF3	11	0.164398	0.110405	0.0179101	0.410947	0.508192	0.689687	0.618079	0.814371	0.872268
ABCG2	5	-0.196349	-0.015807	0.0533301	0.242917	0.895209	0.306183	0.470686	0.972512	0.599985
ABHD10	6	0.237133	0.104364	0.10114	0.0210248	0.385407	0.17285	0.186306	0.75098	0.454291
ABHD11	8	0.129877	0.120071	0.0431853	0.0357472	0.11335	0.410148	0.214947	0.538231	0.693841
ABHD12	15	0.266597	0.167176	0.11451	0.0380377	0.0350824	0.36486	0.217078	0.429449	0.653711
ABHD13	2	-0.0942194	0.182148	0.0349694	0.0937399	0.270108	0.946999	0.293381	0.678226	0.98131
ABHD14A	1	0.0923559	0.0870875	-0.0930177	0.121049	0.797889	0.212445	0.329497	0.938092	0.501923
ABHD14B	6	0.049511	0.110815	0.1141	0.763118	0.351999	0.242113	0.868079	0.729953	0.534132
ABHD15	1	0.203693	-0.0921378	-0.192598	0.0603759	0.48565	0.00294057	0.246614	0.805566	0.0651149
ABHD16A	10	0.182181	0.0255065	-0.0876425	0.0684201	0.909577	0.114057	0.258527	0.979171	0.375609
ABHD17A	1	0.0368128	0.255165	0.194436	0.596054	0.00257046	0.0097088	0.759331	0.233035	0.113632
ABHD17C	4	0.0641912	-0.0199599	-0.028937	0.505981	0.971669	0.852698	0.693789	0.99589	0.947449
ABHD2	3	0.3163	0.0765145	0.167696	0.0914017	0.972753	0.34005	0.290618	0.995991	0.631276
ABHD4	2	0.128044	0.295939	0.197685	0.119962	0.00321081	0.0311737	0.328159	0.245998	0.199394
ABHD5	2	-0.0900937	0.091866	-0.0508932	0.975656	0.218854	0.878205	0.988421	0.642232	0.956395
ABI1	8	-0.0126846	-0.0224625	-0.0415294	0.873181	0.781695	0.470371	0.932862	0.934182	0.737022
ABI2	3	0.0914791	-0.0379104	-0.047619	0.181346	0.923807	0.24638	0.404006	0.983805	0.53999
ABL1	10	-0.177645	-0.0255049	-0.0676529	0.00864823	0.585285	0.121764	0.153964	0.855313	0.386616
ABR	15	-0.0622543	-0.022239	0.0416422	0.123984	0.58263	0.400324	0.331777	0.853703	0.686448
ABRAXAS1	4	-0.0848378	-0.20066	-0.098671	0.327963	0.0474142	0.0819689	0.547742	0.447832	0.32076
ABRAXAS2	5	0.0824961	0.0406117	0.0522104	0.491939	0.445381	0.476921	0.68348	0.78193	0.742156
ABT1	1	-0.114482	-0.108618	-0.0245858	0.860719	0.886589	0.674751	0.924933	0.969172	0.863279
ACAA1	14	0.0259066	-0.0587706	-0.0458546	0.859715	0.235365	0.192361	0.92425	0.652704	0.47879
ACAA2	13	0.103496	0.116949	0.105259	0.0582411	0.127659	0.0381918	0.244049	0.552158	0.220825
ACACA	34	-0.0771255	-0.0376592	-0.0448539	0.123549	0.463747	0.250657	0.331502	0.794324	0.543642
ACAD10	3	0.153279	0.117354	0.0995213	0.078832	0.0667009	0.117044	0.275198	0.479271	0.379357
ACAD11	3	0.00103976	-0.188544	-0.185519	0.552129	0.142073	0.200536	0.730281	0.564339	0.488183
ACAD8	2	0.0206403	0.0398255	-0.22501	0.613739	0.371366	0.061378	0.770883	0.744378	0.277733
ACAD9	21	0.00826881	0.000846626	0.0776385	0.458437	0.730169	0.138767	0.654795	0.914759	0.406593
ACADM	12	0.270206	0.111852	0.15233	0.0390065	0.135045	0.0348552	0.219314	0.554972	0.211658
ACADS	5	0.15604	0.153764	0.167029	0.0159714	0.0566723	0.0320091	0.172773	0.46608	0.20142
ACADSB	9	0.0801286	0.117949	0.183426	0.419516	0.0292914	0.00202679	0.624452	0.419365	0.0541005
ACADVL	31	0.228136	0.0813688	0.0638001	0.00840145	0.319881	0.344179	0.153964	0.709883	0.634964
ACAP2	8	-0.125693	-0.00523715	-0.0130389	0.0160544	0.958744	0.898389	0.172773	0.993986	0.964174
ACAP3	1	0.058862	-0.0234288	-0.1693	0.912006	0.776503	0.0105272	0.956318	0.932191	0.117662
ACAT1	18	0.112847	0.012658	0.0786339	0.0369341	0.89716	0.0828359	0.21644	0.973597	0.322717
ACAT2	10	0.0559225	-0.0732131	-0.0622281	0.521115	0.27105	0.104718	0.705831	0.678226	0.360964
ACBD3	12	0.173992	0.0852005	0.184834	0.0213255	0.1433	0.0144184	0.18676	0.565421	0.139233
ACBD5	14	-0.0340545	0.0166983	0.0771231	0.818038	0.729688	0.249055	0.900177	0.914602	0.541741
ACBD6	3	-0.0459758	-0.252136	-0.172201	0.266744	0.0295974	0.0186265	0.493168	0.420808	0.156958
ACBD7	1	0.305488	0.130189	0.20778	0.00571004	0.285095	0.00668573	0.145224	0.682915	0.0962304
ACD	1	-0.0182413	0.0621637	-0.0316188	0.665364	0.380478	0.41879	0.803783	0.749144	0.700012
ACIN1	37	-0.033974	-0.127554	-0.127498	0.930106	0.0952602	0.0439465	0.96548	0.522913	0.237817
ACKR3	1	-0.00275197	0.0367826	0.116497	0.949002	0.747091	0.133194	0.974808	0.920544	0.399218
ACLY	49	-0.219699	-0.0728173	-0.0329124	0.017204	0.392138	0.639208	0.174555	0.754389	0.843963
ACO1	14	0.00740939	0.0274992	0.00933635	0.971221	0.866262	0.986713	0.98595	0.963146	0.994846
ACO2	29	0.0898476	0.0228167	0.0313246	0.121465	0.778879	0.469876	0.329791	0.932863	0.737022
ACOT1	7	0.337897	0.167514	0.143011	0.0451451	0.289774	0.473222	0.226796	0.685016	0.739535
ACOT11	1	0.150727	0.132427	0.158941	0.800981	0.881135	0.945282	0.889902	0.968029	0.980874
ACOT13	3	0.0352437	0.123121	0.230401	0.989579	0.583442	0.105025	0.995912	0.854228	0.361016
ACOT7	9	-0.0413562	-0.0162475	-0.105843	0.357975	0.427906	0.120084	0.575298	0.774928	0.383652
ACOT8	8	-0.0961197	-0.147302	0.0216221	0.433718	0.374508	0.524167	0.63624	0.745388	0.774747
ACOT9	12	0.109728	0.0795441	0.0929344	0.0359869	0.148946	0.0513999	0.214947	0.575038	0.258543
ACOX1	12	-0.0278053	-0.0523514	0.0179837	0.518077	0.471922	0.972369	0.703889	0.79737	0.99141
ACOX3	7	-0.19222	-0.021103	-0.00143609	0.0627971	0.895291	0.8657	0.250603	0.972512	0.952576
ACP1	8	-0.0484164	-0.0733108	-0.11684	0.171591	0.282191	0.0143497	0.391719	0.682055	0.139233
ACP2	4	0.183987	0.183539	0.302082	0.0586666	0.0335764	0.0036579	0.244883	0.429449	0.0704694
ACP6	3	-0.0906761	0.0533465	-0.0168488	0.717111	0.819202	0.776088	0.837067	0.945208	0.918138
ACSF2	6	0.374065	0.102359	0.0667524	0.0265035	0.588836	0.835358	0.19984	0.855646	0.939336
ACSF3	14	0.250811	0.073809	0.040273	0.0125148	0.643774	0.689919	0.162597	0.877914	0.872419
ACSL1	5	0.114597	0.0548577	0.134425	0.0439716	0.139932	0.0226553	0.225724	0.562151	0.172073
ACSL3	14	-0.0657292	-0.00808015	-0.0384034	0.631543	0.438425	0.23616	0.781747	0.778798	0.527339
ACSS1	4	-0.0932962	0.00288367	0.0537724	0.639307	0.868344	0.623246	0.786796	0.963329	0.834243
ACSS2	5	-0.0724104	0.131513	0.0919252	0.195677	0.165783	0.290096	0.420089	0.595195	0.583923
ACSS3	7	0.179628	0.119279	0.0934745	0.0681161	0.0833604	0.20015	0.258149	0.503333	0.487625
ACTB	29	-0.0672968	-0.0675995	-0.0520925	0.31466	0.140788	0.23676	0.536165	0.562151	0.527608
ACTBL2	3	-0.076976	0.0148129	-0.0799243	0.443785	0.233397	0.223567	0.643493	0.651412	0.51381
ACTC1	6	-0.250556	0.0344516	0.0257802	0.122861	0.859018	0.591421	0.330932	0.960273	0.816141
ACTL6A	16	-0.229087	-0.0577591	0.0930117	0.25632	0.969164	0.186997	0.481521	0.9953	0.47184
ACTN1	58	0.0476606	-0.0109595	-0.00775916	0.528711	0.505228	0.767356	0.711659	0.813412	0.913924
ACTN4	40	-0.0101265	-0.0637084	-0.0184899	0.841853	0.294987	0.884725	0.912807	0.690785	0.960509
ACTR10	2	-0.0598166	0.0424211	-0.114411	0.56839	0.602037	0.186979	0.740493	0.859718	0.47184
ACTR1A	5	0.215569	0.208022	0.198968	0.0530767	0.141128	0.0984853	0.237107	0.562151	0.35022
ACTR1B	3	0.122115	0.180745	0.0902564	0.345053	0.0602866	0.108285	0.562723	0.472603	0.365823
ACTR2	9	0.0398882	0.0498585	0.0852976	0.442389	0.294158	0.0749547	0.64261	0.689831	0.308281
ACTR3	19	-0.0721778	0.101708	0.109348	0.429942	0.105827	0.0497644	0.632881	0.53145	0.2543
ACTR3B	1	-0.0687123	0.0992931	0.0359581	0.287092	0.126729	0.575414	0.510459	0.552158	0.805329
ACTR5	4	0.154918	-0.0304384	0.0654346	0.636253	0.629894	0.902035	0.784475	0.872561	0.965428
ACTR6	2	0.506397	0.0555898	0.0414752	0.0547518	0.812151	0.973658	0.238781	0.943354	0.9922
ACTR8	5	0.223562	0.0152946	-0.0320976	0.0650506	0.96008	0.551113	0.25338	0.993986	0.791042
ACTRT1	1	0.249132	0.300929	0.473657	0.0283384	0.00379691	0.000137733	0.20409	0.261241	0.0147478
ACY1	7	0.362288	0.146384	0.0267112	0.0717312	0.360522	0.653234	0.264352	0.73782	0.850352
ACYP1	4	0.0127421	0.151877	0.111056	0.723478	0.191783	0.196985	0.841655	0.6181	0.484201
ADAM10	13	0.171659	0.118635	0.143316	0.0146584	0.076834	0.00606418	0.171163	0.498219	0.090739
ADAM15	14	-0.0562421	-0.0611819	-0.0852751	0.184948	0.142056	0.0289315	0.408371	0.564339	0.193378
ADAM17	5	0.305558	0.0193764	-0.040407	0.0350786	0.91466	0.19442	0.214332	0.98085	0.481692
ADAM9	3	0.0502502	0.12193	0.174916	0.905665	0.564469	0.363811	0.952122	0.845442	0.652544
ADAMTS19	1	-0.199308	-0.387655	-0.341494	0.165155	0.0327888	0.02397	0.384221	0.428432	0.17814
ADAP1	2	-0.0317621	-0.0376103	-0.0769942	0.811003	0.95094	0.699492	0.89675	0.991334	0.876796
ADAR	37	0.0300257	0.0606023	0.0181168	0.316404	0.108961	0.443105	0.537322	0.536397	0.7181
ADAT1	2	0.0171842	0.104255	-0.0380172	0.403543	0.860388	0.2391	0.612488	0.960519	0.530369
ADAT3	2	0.279304	0.261505	0.0869181	0.153209	0.204199	0.226566	0.371132	0.630969	0.516387
ADCK1	1	-0.349513	0.0366311	-0.169538	0.0392042	0.660972	0.895283	0.219849	0.884548	0.963075
ADCK5	6	0.00129949	0.0406911	0.0828457	0.749141	0.357497	0.126384	0.859101	0.734597	0.391444
ADCY3	2	0.187422	0.247483	0.0236834	0.113961	0.0228648	0.971363	0.320272	0.402811	0.990908
ADCY5	3	0.048924	0.063257	0.0132758	0.285276	0.101674	0.537088	0.509689	0.528292	0.783121
ADCY9	12	0.177042	0.0843253	0.0391005	0.0240074	0.127916	0.881901	0.19191	0.552158	0.959066
ADD1	5	0.00589549	0.192472	-0.0661996	0.831702	0.286504	0.25748	0.907418	0.68382	0.55249
ADD3	1	-0.0897779	0.101319	0.000288364	0.784097	0.255416	0.594169	0.879641	0.666773	0.817939
ADGRE5	2	0.179214	0.00167923	0.0320568	0.144693	0.696714	0.793594	0.360843	0.901895	0.926354
ADGRG1	4	0.257308	0.085757	-0.11993	0.306952	0.681473	0.0936692	0.527985	0.892983	0.342905
ADGRG6	6	0.017487	-0.0692512	-0.157998	0.616232	0.471944	0.207146	0.772091	0.79737	0.496352
ADGRL2	2	0.279728	0.120715	0.088402	0.0581918	0.439508	0.645228	0.244049	0.779465	0.847302
ADH5	10	-0.0992415	0.00864615	0.0694515	0.0857969	0.767918	0.18391	0.283599	0.929852	0.468809
ADI1	8	-0.115343	-0.312495	-0.22546	0.0445003	0.0031695	0.000271343	0.225724	0.245998	0.019914
ADIPOR1	1	0.090923	-0.0441319	-0.0254203	0.292198	0.315189	0.282651	0.514669	0.706627	0.57749
ADIRF	4	-0.287882	0.0524307	0.316039	0.205099	0.187713	0.00350576	0.428782	0.613848	0.0694483
ADK	14	-0.0667854	-0.0329938	0.0437883	0.172882	0.284352	0.720537	0.393552	0.682623	0.888109
ADNP	28	-0.106388	-0.0517278	0.0268573	0.347199	0.872512	0.60134	0.564742	0.963329	0.821327
ADNP2	2	-0.0286693	-0.0236503	-0.0563127	0.996177	0.710901	0.152696	0.99851	0.907438	0.428195
ADO	7	-0.0689271	-0.194843	-0.164258	0.161909	0.00422881	0.00405084	0.381388	0.271432	0.0732765
ADPGK	8	0.00553176	0.050697	-0.0581993	0.958536	0.809742	0.116693	0.979769	0.94201	0.378945
ADPRS	8	-0.0869356	-0.0808978	-0.0346914	0.137265	0.0794514	0.426642	0.350157	0.498219	0.704869
ADRM1	6	-0.23973	-0.14619	-0.0568359	0.00355485	0.0522285	0.553673	0.13182	0.457212	0.792312
ADSL	6	-0.22324	-0.131254	-0.0978201	0.0163749	0.0926192	0.17028	0.172773	0.520207	0.450296
ADSS1	1	0.34714	0.0387977	-0.123609	0.23643	0.770431	0.377863	0.463127	0.930837	0.666471
ADSS2	9	-0.133365	-0.0847972	-0.0766726	0.0361022	0.0865754	0.187212	0.214947	0.507785	0.472227
AFDN	30	0.0940365	0.0129041	0.0193314	0.0573509	0.644984	0.485653	0.243335	0.87834	0.747889
AFF4	8	0.0336706	-0.0661124	-0.0585001	0.515329	0.240829	0.0605683	0.701612	0.657163	0.277005
AFG1L	1	-0.0989498	0.0105095	0.0183035	0.552034	0.483807	0.451085	0.730281	0.803209	0.724949
AFG3L2	23	0.0204823	0.0587304	0.143127	0.431381	0.214762	0.00562753	0.634393	0.63956	0.0874641
AFTPH	10	0.0799062	0.0213449	0.0474945	0.120927	0.597449	0.406063	0.32928	0.858756	0.691518
AGA	3	-0.0973488	-0.00905677	0.0213265	0.847894	0.722962	0.447807	0.916624	0.911853	0.722286
AGAP1	3	0.247092	0.167736	0.0916971	0.0748692	0.346152	0.641952	0.269599	0.72538	0.845187
AGAP3	4	-0.0138626	-0.0101379	0.0161508	0.819284	0.559456	0.720002	0.901142	0.843796	0.887634
AGFG1	4	0.118786	-0.0141176	0.0780896	0.123869	0.948001	0.16553	0.331777	0.990753	0.444813
AGFG2	5	-0.165729	0.110123	-0.0399413	0.0557314	0.434562	0.798787	0.240204	0.777376	0.927864
AGGF1	4	0.240718	0.197697	0.207795	0.138432	0.23064	0.207413	0.351741	0.650151	0.496681
AGK	10	0.211026	0.13746	0.102868	0.00317652	0.0345483	0.0304447	0.126825	0.429449	0.196552
AGL	9	-0.0987609	0.0882699	-0.00584412	0.0797576	0.0392724	0.98113	0.276106	0.430488	0.99346
AGMAT	4	0.107481	0.0324732	0.129089	0.726788	0.950078	0.435262	0.844132	0.990972	0.711826
AGO1	2	-0.355308	-0.200985	-0.00287934	0.197669	0.757361	0.522051	0.421288	0.925798	0.772869
AGO2	13	-0.191209	0.0330693	0.0230161	0.14686	0.511338	0.766871	0.363658	0.817191	0.913924
AGO3	2	0.19803	0.203104	0.0248575	0.178494	0.240073	0.809085	0.400523	0.656605	0.930707
AGPAT1	3	0.155832	0.0870793	0.0212272	0.0807168	0.184184	0.575591	0.277359	0.61323	0.805431
AGPAT2	1	0.00112891	0.0787109	-0.563276	0.915634	0.782226	0.382337	0.958159	0.934403	0.670042
AGPAT3	3	0.438552	0.151008	0.0935664	0.00268254	0.1076	0.300826	0.118382	0.533082	0.593792
AGPAT5	6	0.0261637	0.0097536	-0.0354852	0.673521	0.737115	0.70302	0.808435	0.917681	0.879031
AGR2	8	0.203108	0.274152	0.131668	0.0046877	0.0368063	0.0559992	0.138936	0.429449	0.267025
AGR3	7	0.275976	0.0899227	-0.00352087	0.00558753	0.172548	0.895858	0.144289	0.60083	0.963252
AGRN	23	0.257765	0.0359558	-0.0533035	0.0251951	0.673419	0.113355	0.196601	0.889118	0.374578
AGTPBP1	1	0.522585	0.356096	-0.0292215	0.516855	0.469712	0.566961	0.702572	0.795784	0.80161
AGTRAP	2	0.656791	0.251954	0.138414	0.0343843	0.4396	0.551615	0.212805	0.779465	0.791269
AHCTF1	16	-0.0399779	-0.0346674	-0.00141324	0.870154	0.998827	0.747989	0.931695	1	0.903612
AHCY	15	-0.0892151	-0.0532409	-0.0382905	0.0424954	0.360908	0.178434	0.223601	0.73782	0.462968
AHCYL1	4	-0.00332308	0.0514568	0.049263	0.981941	0.14927	0.224694	0.990943	0.575302	0.514668
AHCYL2	7	-0.0649065	-0.0418564	-0.0906843	0.319175	0.337563	0.0750916	0.540361	0.719228	0.308617
AHDC1	6	-0.0968974	-0.136328	-0.165871	0.25488	0.0222516	0.00129767	0.480532	0.398582	0.0442472
AHNAK	272	-0.104372	-0.0425582	0.00699677	0.469052	0.689772	0.686133	0.663754	0.897502	0.870201
AHR	1	-0.206425	-0.255477	-0.0559701	0.0829582	0.0981517	0.296497	0.280754	0.52725	0.589261
AHSA1	20	-0.0163907	0.0194155	0.0782243	0.240932	0.803668	0.654802	0.468135	0.939985	0.85158
AHSG	3	-0.022007	-0.0613412	-0.0246279	0.798045	0.413528	0.28597	0.887921	0.770685	0.581141
AIDA	1	-0.162071	-0.205251	-0.0911103	0.166193	0.178941	0.428628	0.384824	0.605587	0.706587
AIF1L	7	-0.139026	-0.0467419	-0.0355159	0.0627179	0.400485	0.389483	0.250596	0.761997	0.676438
AIFM1	16	0.109155	0.0258243	0.0785129	0.0316294	0.733653	0.0522282	0.21063	0.917079	0.259826
AIFM2	4	-0.0595638	-0.096978	-0.140176	0.18941	0.056832	0.00476493	0.413132	0.466532	0.0801716
AIMP1	15	-0.0770091	-0.0765406	0.00948859	0.446274	0.388041	0.820391	0.644982	0.752499	0.93511
AIMP2	12	-0.0376956	0.0210221	0.00104777	0.572098	0.910313	0.997858	0.742486	0.979183	0.999366
AIP	11	-0.364415	-0.178514	-0.114458	0.0661986	0.200365	0.244644	0.254936	0.627138	0.538174
AJUBA	1	0.0286917	-0.0865491	-0.0999968	0.353814	0.618248	0.631263	0.57207	0.867413	0.839685
AK1	13	0.0754884	-0.0503791	-0.0212651	0.632066	0.381448	0.495296	0.781747	0.749144	0.755045
AK2	14	0.145352	0.0475729	-0.0265934	0.244678	0.679494	0.570442	0.471656	0.892556	0.802452
AK3	9	0.113479	0.0495984	0.097817	0.0907554	0.617075	0.0991494	0.28975	0.8671	0.351565
AK4	5	0.0416908	-0.0260825	0.00284966	0.262433	0.361106	0.744603	0.488245	0.73782	0.901993
AK6	2	-0.102832	-0.0505939	0.125231	0.172648	0.455947	0.714222	0.393151	0.788028	0.884286
AKAP1	18	-0.0577982	-0.117094	-0.105343	0.204588	0.0341432	0.0410801	0.428178	0.429449	0.229393
AKAP10	6	-0.000239248	0.0809952	0.263664	0.847461	0.117186	5.35721e-05	0.916566	0.54229	0.00928578
AKAP11	10	-0.163117	-0.139998	-0.226053	0.00364362	0.00574262	0.00016814	0.13182	0.30519	0.0159961
AKAP13	16	-0.268015	-0.12658	-0.113193	0.00741885	0.0444312	0.0126977	0.150726	0.443943	0.131094
AKAP17A	11	0.0917367	0.0631685	-0.00292414	0.132435	0.170837	0.66969	0.343502	0.598883	0.86111
AKAP5	1	0.167456	0.361661	0.112867	0.559347	0.201381	0.724605	0.734674	0.628276	0.889992
AKAP8	9	0.05284	-0.124157	0.0232977	0.419177	0.0512636	0.863629	0.62419	0.455637	0.951957
AKAP8L	12	-0.0609138	-0.0321883	0.00981179	0.367947	0.659952	0.671884	0.583656	0.884297	0.862067
AKAP9	92	-0.115721	-0.0297009	-0.0220652	0.0548173	0.436865	0.603928	0.238791	0.778511	0.822405
AKIP1	2	-0.175917	-0.272797	-0.316766	0.113187	0.000997097	0.00369797	0.319343	0.169816	0.0705961
AKR1A1	13	-0.0933609	-0.0257014	-0.0682737	0.05718	0.43385	0.0511983	0.243039	0.777376	0.258203
AKR1B10	1	0	0	0	1	0.276326	1	1	0.679382	1
AKR1C2	6	0.133298	-0.00630581	-0.0243913	0.588929	0.649143	0.301882	0.755726	0.87834	0.595057
AKR1C3	11	0.0379071	-0.0176436	0.0125185	0.631609	0.922126	0.386238	0.781747	0.983588	0.674008
AKR7A2	9	-0.0769907	-0.0663624	-0.0257206	0.116098	0.245516	0.565166	0.324064	0.661221	0.800449
AKR7A3	1	0.371626	0.126343	0.0205024	0.229661	0.737394	0.919021	0.455898	0.917694	0.972131
AKR7L	1	0.93752	-0.116805	-0.727272	0.136265	0.69789	0.387377	0.348625	0.902945	0.674605
AKT1	11	-0.335567	-0.0196277	0.082857	0.0343762	0.934682	0.345499	0.212805	0.987072	0.63618
AKT1S1	2	-0.201389	-0.415807	-0.0952809	0.27017	0.255639	0.788055	0.495351	0.666773	0.923248
AKT2	6	-0.107147	0.011769	-0.070092	0.0217954	0.71265	0.213297	0.187104	0.907748	0.502577
AKTIP	2	-0.243043	-0.0658106	-0.121814	0.00274143	0.299161	0.0446828	0.118382	0.693751	0.240013
ALAD	3	0.0818025	-0.0361256	-0.0461731	0.791647	0.434579	0.22561	0.884949	0.777376	0.515847
ALAS1	3	-0.176903	-0.0896258	-0.236898	0.0159089	0.125258	0.00227576	0.172773	0.552084	0.0569384
ALB	4	-0.0933516	-0.187044	-0.224964	0.386531	0.0269705	0.00767025	0.597154	0.409123	0.10121
ALCAM	13	-0.102646	-0.173939	-0.169667	0.374504	0.0817261	0.0442182	0.588125	0.498866	0.238568
ALDH16A1	10	0.0965628	0.100799	-0.0101363	0.689743	0.487832	0.469006	0.819355	0.806876	0.737022
ALDH18A1	24	0.191444	0.128968	0.0653267	0.0123359	0.018127	0.115842	0.162097	0.38926	0.377888
ALDH1A3	1	0.144751	0.0908748	-0.0554706	0.410027	0.128906	0.618404	0.617735	0.55219	0.830646
ALDH1B1	14	0.0543925	-0.00578567	-0.0302964	0.300685	0.958071	0.934741	0.522218	0.993927	0.976524
ALDH3A2	7	-0.104247	-0.0105586	0.0154499	0.0614372	0.773664	0.976749	0.248522	0.932001	0.993076
ALDH4A1	20	0.0604811	-0.0731256	-0.0526321	0.362635	0.402031	0.520308	0.578804	0.762803	0.771947
ALDH5A1	16	0.126587	0.111966	0.122359	0.0221302	0.0381895	0.0277302	0.187206	0.429449	0.189484
ALDH6A1	19	0.063638	0.132762	0.140247	0.321623	0.0386427	0.0167789	0.54292	0.430436	0.149759
ALDH7A1	18	0.0191302	0.0559466	0.0849326	0.450292	0.151402	0.0485914	0.647991	0.577576	0.249964
ALDH9A1	11	-0.0549701	0.0555106	0.0694849	0.411706	0.330508	0.0947194	0.61847	0.712981	0.344947
ALDOA	32	-0.0214411	-0.0345803	-0.0829836	0.711023	0.375721	0.135986	0.832947	0.745981	0.403508
ALDOC	10	-0.122125	-0.283265	-0.293877	0.160166	0.0946387	0.00766348	0.3789	0.522408	0.10121
ALG1	5	0.127396	0.0812389	0.0638806	0.0592758	0.195638	0.170156	0.245218	0.621781	0.450281
ALG10	1	0.189392	0.0450132	0.10102	0.427865	0.416394	0.990334	0.631861	0.772701	0.995501
ALG11	3	0.0463117	0.0380566	0.108111	0.759823	0.962444	0.208298	0.865983	0.994702	0.497565
ALG12	1	-0.0640379	-0.269233	-0.168344	0.675981	0.0743597	0.266158	0.810699	0.494424	0.561412
ALG13	5	0.0314464	-0.13808	-0.179329	0.748706	0.0493061	0.0125444	0.859091	0.450791	0.130455
ALG14	1	0.174943	0.208125	0.0888796	0.109444	0.069289	0.88459	0.31528	0.483564	0.960497
ALG2	8	-0.00663211	-0.0402205	-0.0594658	0.742003	0.582607	0.303608	0.853941	0.853703	0.596809
ALG3	3	-0.0203993	0.0691795	-0.047935	0.978345	0.366124	0.820467	0.988998	0.740577	0.93511
ALG5	5	-0.158948	-0.0394273	-0.00596448	0.358963	0.654232	0.709776	0.576526	0.880678	0.882743
ALG6	1	0.513149	0.022404	0.0658607	0.0915842	0.343033	0.604459	0.29079	0.723627	0.822405
ALG8	2	-0.0305502	0.137063	0.209516	0.853158	0.108895	0.0608146	0.920274	0.536397	0.27736
ALG9	2	-0.190285	-0.255491	-0.179873	0.108032	0.127289	0.0343147	0.314316	0.552158	0.210198
ALKBH1	3	0.258269	0.0238976	0.0330368	0.206577	0.442195	0.475031	0.430819	0.780112	0.740711
ALKBH4	2	-0.142963	-0.0437728	-0.151182	0.249312	0.867627	0.460211	0.476133	0.963329	0.732116
ALKBH5	7	0.128833	-0.0125228	0.0148635	0.248703	0.847949	0.99025	0.475441	0.956926	0.995501
ALKBH6	1	0.208926	-0.0294954	-0.175351	0.547909	0.318625	0.0323386	0.726835	0.709165	0.201988
ALMS1	4	-0.209726	-0.106845	-0.0946969	0.049899	0.562526	0.438295	0.233326	0.845277	0.71542
ALS2	1	0.243783	-0.045495	0.218041	0.00824172	0.56399	0.275557	0.153964	0.845442	0.570512
ALYREF	11	0.057172	-0.0561576	0.0838013	0.425943	0.416711	0.216682	0.629882	0.772701	0.50573
AMACR	3	-0.0368975	0.00072008	-0.0487185	0.982957	0.951502	0.887135	0.991325	0.991517	0.961635
AMBRA1	4	0.224971	0.0233761	-0.0893521	0.518457	0.941288	0.205096	0.704129	0.988494	0.493434
AMD1	1	-0.640999	-0.545256	-0.853779	0.000206713	0.000247583	0.000104969	0.0435835	0.0733798	0.0132491
AMDHD2	3	-0.109734	-0.00543576	-0.0710714	0.255091	0.465709	0.948889	0.480532	0.795203	0.981512
AMFR	4	0.115962	0.0464074	-0.0381318	0.0269779	0.806567	0.505633	0.201373	0.941211	0.762131
AMIGO1	1	0.346895	-0.0453393	-0.259892	0.121427	0.618767	0.365644	0.329791	0.867738	0.654198
AMIGO2	1	0.330072	0.154624	0.156707	0.0979485	0.499186	0.746631	0.299639	0.810983	0.902848
AMN1	1	-0.16653	-0.0964609	0.0290361	0.342755	0.98987	0.388416	0.560234	0.998838	0.675459
AMOTL1	1	0.176458	-0.156563	0.104741	0.053008	0.369914	0.126594	0.23708	0.743883	0.39178
AMOTL2	8	0.0270342	0.0264969	-0.127898	0.872123	0.642686	0.0321786	0.932358	0.87759	0.201764
AMPD2	7	-0.106981	-0.0406036	-0.0322436	0.0903513	0.212951	0.304553	0.28975	0.637616	0.598085
AMZ2	1	-0.192854	0.182731	0.135509	0.0513663	0.109013	0.127321	0.236432	0.536397	0.392966
ANAPC1	16	0.151037	0.0871126	0.0348754	0.29453	0.988105	0.823514	0.517122	0.998838	0.93578
ANAPC13	1	-0.196873	0.139827	-0.0531557	0.197793	0.855864	0.713184	0.421288	0.959986	0.883853
ANAPC16	2	0.00339175	-0.0725886	-0.092417	0.812444	0.129128	0.0813117	0.897076	0.55219	0.319921
ANAPC2	7	0.143909	0.127483	0.0573289	0.187147	0.199646	0.440132	0.410425	0.626412	0.71621
ANAPC4	4	-0.124626	-0.101591	0.0122683	0.288731	0.412158	0.525917	0.511764	0.770073	0.775688
ANAPC5	7	-0.0754883	-0.0309478	0.0183957	0.094951	0.786645	0.463989	0.295395	0.934681	0.734037
ANAPC7	9	-0.0766097	-0.0230169	-0.00337229	0.196405	0.586671	0.994467	0.420852	0.85544	0.997726
ANGEL1	2	0.159078	0.165637	0.295458	0.208756	0.158185	0.0391525	0.432932	0.583801	0.224079
ANK3	26	0.076575	0.0958403	0.115082	0.235984	0.0625317	0.0126785	0.462839	0.476748	0.131094
ANKFY1	6	-0.188051	-0.183784	-0.0847088	0.224554	0.066346	0.405106	0.450662	0.479266	0.690957
ANKHD1	31	-0.217671	-0.130658	-0.123306	0.0014976	0.0148768	0.0160778	0.100352	0.368911	0.146064
ANKIB1	3	0.0307971	-0.101908	-0.0490907	0.545085	0.329134	0.272337	0.724461	0.712981	0.569061
ANKLE2	16	-0.0356868	-0.105054	-0.142524	0.70214	0.0259715	0.00277746	0.827703	0.407664	0.0630653
ANKRD11	7	-0.0261652	-0.0519546	-0.0830583	0.466867	0.124951	0.0918625	0.661947	0.552084	0.340169
ANKRD12	2	0.170587	0.213358	0.190997	0.0756242	0.0835385	0.0931262	0.271077	0.503333	0.341566
ANKRD13D	1	0.57013	0.37451	0.172763	0.0385066	0.415951	0.317055	0.21782	0.772701	0.609242
ANKRD17	5	-0.224244	-0.100104	-0.0860159	0.0132617	0.165907	0.15542	0.16617	0.595195	0.432332
ANKRD27	5	0.32424	0.215519	0.138454	0.0461949	0.155113	0.238442	0.227904	0.579682	0.529664
ANKRD28	7	0.0255206	0.0568755	-0.0234393	0.248263	0.512963	0.906352	0.47519	0.817727	0.967629
ANKRD39	3	0.131153	0.10916	-0.0272794	0.743506	0.940905	0.294681	0.854887	0.988361	0.586773
ANKRD40	1	0.290948	-0.115473	0.0169383	0.244494	0.660679	0.69443	0.471656	0.884548	0.874749
ANKRD44	3	-0.0614438	0.114962	0.047112	0.269458	0.0604119	0.210386	0.49501	0.472623	0.500223
ANKRD46	2	-0.124012	-0.107287	-0.0677368	0.0767114	0.255942	0.14567	0.27254	0.666773	0.417245
ANKRD50	10	0.172765	0.0304472	-0.00745907	0.411596	0.726088	0.515004	0.61847	0.913231	0.768815
ANKRD52	9	0.093308	-0.00100784	-0.152799	0.924326	0.606244	0.00639818	0.962862	0.862577	0.0940317
ANKRD54	5	-0.164895	-0.144269	-0.107133	0.020998	0.0552655	0.117167	0.186306	0.461864	0.379357
ANKS1A	6	0.0768583	-0.0294093	-0.0901621	0.41443	0.743568	0.56839	0.620598	0.919647	0.802237
ANKZF1	5	0.000567831	0.0589263	0.0176825	0.668026	0.103739	0.419826	0.805226	0.528292	0.700862
ANLN	17	-0.195159	-0.052188	-0.0149607	0.0298393	0.287713	0.804955	0.206477	0.684135	0.929668
ANO10	6	-0.0853446	-0.0660201	0.0418957	0.3404	0.65941	0.323783	0.558649	0.883878	0.616675
ANO6	5	0.100249	0.138365	-0.057623	0.128117	0.0599726	0.978267	0.33776	0.472603	0.993349
ANP32A	8	0.00241587	-0.140066	-0.084426	0.596961	0.081537	0.137666	0.759778	0.498866	0.405283
ANP32B	5	-0.160106	-0.0814417	-0.0365592	0.0961369	0.469993	0.929359	0.296926	0.795817	0.974993
ANP32E	7	-0.222608	-0.171693	-0.0964331	0.0421585	0.0589421	0.247888	0.223601	0.471999	0.541491
ANTKMT	1	0.360194	0.211105	0.0658623	0.0529961	0.11336	0.287542	0.23708	0.538231	0.582592
ANXA1	6	-0.0294736	-0.194628	-0.25782	0.800876	0.0231657	0.00281271	0.889902	0.402811	0.0633764
ANXA11	17	0.169234	0.0968237	0.053714	0.091928	0.548614	0.412401	0.290969	0.836887	0.696055
ANXA2	24	0.329292	0.125648	0.153865	0.0569674	0.24697	0.17901	0.242536	0.661221	0.463609
ANXA3	17	-0.0975177	-0.0587318	0.00768988	0.194856	0.40928	0.688258	0.419729	0.768684	0.871319
ANXA4	20	-0.114753	-0.0600481	0.0460465	0.240731	0.494601	0.483322	0.467861	0.809536	0.746987
ANXA5	22	-0.197717	-0.0884032	0.0192405	0.0646761	0.520719	0.600088	0.25338	0.822435	0.820917
ANXA6	35	0.0210213	0.0504206	-0.018777	0.43771	0.334815	0.923092	0.639251	0.716653	0.973364
ANXA7	13	0.112221	0.129543	0.102641	0.361669	0.572969	0.219925	0.578745	0.849607	0.509287
ANXA8	1	-0.152068	-0.167398	0.0363164	0.750582	0.521866	0.958563	0.860456	0.823571	0.985812
ANXA9	10	0.131442	0.132963	0.164356	0.0409149	0.12841	0.0257473	0.222651	0.55219	0.184207
AP1AR	5	0.0456417	0.0673717	0.0667592	0.795593	0.569737	0.279737	0.886472	0.847551	0.574228
AP1B1	19	0.0710519	0.0735729	0.147499	0.117187	0.103975	0.00410505	0.325538	0.528336	0.0739101
AP1G1	19	-0.0215615	0.00656838	0.0385543	0.607947	0.820771	0.444424	0.768244	0.945605	0.719482
AP1G2	5	0.17758	0.190292	0.101082	0.122522	0.0630069	0.212965	0.330932	0.476748	0.502205
AP1M1	12	0.0253118	0.0736797	0.117814	0.918756	0.131156	0.0247805	0.959731	0.554311	0.180661
AP1M2	12	-0.0447667	0.0471975	0.0930532	0.297253	0.245289	0.0382274	0.517891	0.661221	0.220825
AP1S1	5	0.278551	0.0941697	0.0725787	0.173959	0.659004	0.816673	0.394503	0.883641	0.933707
AP1S2	1	0.161455	0.0843991	0.0481503	0.311819	0.861646	0.602038	0.532985	0.961043	0.821988
AP1S3	1	0.219126	0.0440024	0.0508752	0.0742116	0.290548	0.471474	0.268567	0.685118	0.737701
AP2A1	41	0.0321966	-0.0358593	-0.0500606	0.830845	0.34911	0.23203	0.907082	0.728157	0.522661
AP2A2	15	-0.129449	-0.0520165	-0.0913985	0.0588739	0.373636	0.287305	0.244883	0.744952	0.582319
AP2B1	35	-0.0226521	-0.0134057	0.0461454	0.693479	0.766972	0.222741	0.821955	0.929602	0.512524
AP2M1	10	-0.0692342	-0.0204486	0.0290424	0.344871	0.885394	0.792333	0.562569	0.969017	0.92571
AP2S1	3	0.273116	0.104817	0.0669648	0.0454604	0.463751	0.765805	0.227524	0.794324	0.913924
AP3B1	21	0.0504287	-0.00179974	-0.00554765	0.558237	0.726303	0.694556	0.734534	0.913231	0.874749
AP3D1	14	-0.0305774	0.00689466	-0.0146452	0.424839	0.707836	0.662294	0.628853	0.907283	0.857158
AP3M1	8	-0.152682	0.04642	0.0832058	0.0446101	0.359076	0.248282	0.225724	0.736307	0.541491
AP3S1	3	-0.0161898	0.0242518	0.148427	0.789824	0.864009	0.192711	0.883749	0.962146	0.479352
AP3S2	4	-0.0479254	0.00128366	-0.0233745	0.274362	0.77122	0.588245	0.498933	0.930837	0.81492
AP4B1	5	0.0851848	-0.0255887	-0.110567	0.5832	0.706294	0.0726923	0.7509	0.906512	0.304704
AP4E1	5	0.00170212	-0.000293697	0.0399769	0.859722	0.475644	0.228483	0.92425	0.80026	0.518594
AP4M1	4	0.117949	0.132371	0.024548	0.388521	0.892126	0.983569	0.598788	0.971692	0.994022
AP4S1	2	-0.0873168	-0.29485	-0.0945748	0.466637	0.0350196	0.406164	0.661864	0.429449	0.691538
AP5S1	4	-0.0413487	-0.108856	-0.221943	0.360938	0.132489	0.041667	0.578415	0.554505	0.23133
AP5Z1	3	-0.133217	0.0521508	-0.13915	0.147687	0.720712	0.517201	0.365001	0.910113	0.769857
APAF1	1	0	0	1.02272	0.727762	0.864496	0.0900493	0.844471	0.962261	0.335389
APBB2	2	-0.0786713	-0.0474639	-0.0598836	0.429552	0.801194	0.620472	0.632709	0.939548	0.831685
APC	9	-0.308161	-0.26241	-0.215582	0.0118035	0.0228594	0.0292893	0.161847	0.402811	0.19407
APEH	14	0.00544477	0.0902784	0.0781384	0.883563	0.06541	0.0753226	0.937326	0.479266	0.308735
APEX1	15	-0.0568327	-0.0499161	0.0210875	0.165825	0.226995	0.976866	0.38443	0.647972	0.993076
APH1A	1	0.242377	0.413529	0.36958	0.037144	0.020369	0.000533573	0.21644	0.392825	0.0291611
API5	15	-0.0963501	-0.100259	0.0680241	0.648131	0.452058	0.124146	0.791821	0.785206	0.388801
APIP	3	-0.049143	0.105786	0.0802163	0.570754	0.0292313	0.225478	0.742067	0.419365	0.515741
APLP2	18	0.125551	0.066855	0.0279516	0.017087	0.2321	0.604584	0.174555	0.651027	0.822405
APMAP	20	0.166735	0.0283728	0.0524599	0.00751088	0.543462	0.157365	0.150726	0.834911	0.435103
APOB	4	-0.290708	-0.259913	-0.174302	0.000176294	0.0011384	0.00414407	0.0425863	0.169816	0.0740806
APOBEC3B	3	0.292973	0.256152	0.297063	0.00702852	0.0104753	0.0016922	0.150726	0.344213	0.0511378
APOC3	1	-0.0168666	-0.0461272	-0.0586094	0.793719	0.937808	0.95495	0.885482	0.988032	0.984066
APOD	4	-0.028112	0.0496706	0.126065	0.851696	0.685323	0.202555	0.919083	0.895079	0.490075
APOE	3	-0.0734621	-0.184047	-0.223252	0.554398	0.0843491	0.00636897	0.732167	0.503481	0.0940317
APOL2	2	0.254538	0.0760819	-0.0430855	0.088834	0.350313	0.49512	0.288012	0.728187	0.754925
APOO	4	0.0849869	0.0257478	0.0568352	0.370351	0.84315	0.474695	0.585181	0.955174	0.740711
APOOL	4	-0.0451059	-0.0627938	-0.0808356	0.460288	0.261687	0.49213	0.656119	0.671272	0.753339
APP	14	-0.023461	-0.0514367	-0.0604311	0.924177	0.616219	0.580347	0.962862	0.866469	0.808854
APPBP2	4	-0.0728118	0.0361569	-0.0844618	0.161958	0.900563	0.0437995	0.381388	0.974607	0.237591
APPL1	13	0.0287839	0.0804229	0.0669476	0.367473	0.185643	0.118428	0.583268	0.613688	0.381207
APPL2	8	0.420493	0.180302	0.112329	0.0175438	0.181618	0.562589	0.174847	0.609561	0.799217
APRT	11	-0.0701109	-0.0509059	-0.189319	0.749177	0.255343	0.00975406	0.859101	0.666773	0.113632
APTX	3	0.0372849	0.14062	0.154758	0.742616	0.0811803	0.0758061	0.854375	0.498305	0.309162
AQR	20	0.0541577	0.02559	0.0302835	0.144815	0.528989	0.55276	0.360915	0.827861	0.792036
ARAF	4	-0.142057	-0.14134	-0.226895	0.0692817	0.0861065	0.0194701	0.259293	0.507679	0.159976
ARAP1	9	-0.0205181	-0.0279342	-0.0562897	0.253241	0.450352	0.0845865	0.478771	0.784608	0.325852
ARCN1	19	-0.178455	-0.0908131	-0.0185035	0.0402151	0.344855	0.873097	0.222651	0.725337	0.955558
AREG	1	-0.216608	-0.0940233	-0.172719	0.042262	0.264679	0.0672588	0.223601	0.673898	0.292858
ARF3	10	-0.22084	-0.081865	0.0669255	0.0329839	0.673217	0.0916384	0.212171	0.889107	0.339666
ARF4	4	-0.0253694	0.138027	0.263524	0.850259	0.501806	0.0363922	0.918046	0.811635	0.216438
ARF5	4	-0.0778221	0.0371974	0.176185	0.355872	0.508912	0.0121256	0.573875	0.815148	0.127476
ARF6	4	-0.37606	-0.241858	-0.0667708	0.0706233	0.193052	0.830706	0.261842	0.619008	0.937846
ARFGAP1	13	-0.0423082	-0.117272	-0.0476642	0.427748	0.167498	0.42825	0.631861	0.595359	0.70639
ARFGAP2	14	-0.0787467	-0.0644197	-0.0569926	0.109094	0.423692	0.264065	0.314977	0.774928	0.55931
ARFGAP3	1	-0.290085	-0.346046	-0.227955	0.0203867	0.0186308	0.0189596	0.185841	0.38926	0.158099
ARFGEF1	12	0.0758786	0.173597	0.181626	0.259401	0.051715	0.0267218	0.485131	0.457212	0.18683
ARFGEF2	20	-0.0719983	0.0124017	0.179257	0.20739	0.588403	0.00472775	0.431581	0.855646	0.0797199
ARFGEF3	18	-0.0283845	0.0219317	0.0443032	0.456993	0.679158	0.303314	0.653599	0.892495	0.596563
ARFIP1	13	-0.0681696	-0.0868566	-0.079663	0.324619	0.166509	0.663882	0.545348	0.595318	0.858225
ARFIP2	6	0.000287295	0.107144	0.0395566	0.567258	0.0376769	0.311686	0.739893	0.429449	0.604088
ARFRP1	3	-0.0687462	-0.0353895	-0.0517982	0.702441	0.962358	0.4444	0.827804	0.994702	0.719482
ARG2	1	-0.0840476	-0.104239	-0.0652131	0.288079	0.225601	0.509274	0.511389	0.647943	0.765418
ARGLU1	7	0.0122327	-0.131718	-0.0625764	0.95017	0.0853277	0.172161	0.975602	0.505921	0.453076
ARHGAP1	14	0.00900957	0.00578332	0.0750371	0.87378	0.86132	0.373465	0.933164	0.960818	0.663004
ARHGAP10	5	0.127738	-0.0105462	0.0128519	0.163701	0.817626	0.685388	0.382848	0.945208	0.869543
ARHGAP12	10	-0.0256926	0.0578089	0.0563042	0.366233	0.323968	0.373184	0.582616	0.71168	0.662947
ARHGAP17	9	-0.0169525	0.0373535	0.0666223	0.280994	0.838124	0.80499	0.505212	0.953555	0.929668
ARHGAP18	3	0.0422651	0.0441391	-0.0666732	0.945156	0.794433	0.307155	0.972681	0.937074	0.600746
ARHGAP21	3	0.0714307	0.12853	-0.0705534	0.101391	0.0729594	0.867092	0.305441	0.492316	0.953319
ARHGAP26	1	-0.0973398	-0.134459	-0.172132	0.160785	0.326181	0.270527	0.379832	0.712659	0.568032
ARHGAP27	4	0.248152	0.142679	0.136109	0.104046	0.367832	0.338135	0.308636	0.741825	0.629093
ARHGAP32	1	0.380979	0.302828	-0.186535	0.193242	0.591342	0.148253	0.417356	0.856395	0.421155
ARHGAP35	12	-0.0222255	0.0153519	0.103992	0.363204	0.782487	0.134092	0.579181	0.934569	0.401131
ARHGAP36	2	0.199058	0.180844	0.0828123	0.0424205	0.0717266	0.638801	0.223601	0.489608	0.843963
ARHGAP39	4	0.169167	0.063713	-0.0321599	0.281285	0.560548	0.587795	0.505499	0.844163	0.814534
ARHGAP44	2	-0.0534781	-0.124683	0.0806172	0.16995	0.0929195	0.575026	0.389479	0.521514	0.805329
ARHGAP5	6	-0.134105	-0.0632242	-0.0855259	0.0968697	0.84115	0.674521	0.298114	0.954624	0.863279
ARHGDIA	8	-0.13936	-0.017667	-0.01034	0.121692	0.496359	0.481109	0.329988	0.80963	0.745262
ARHGEF1	16	-0.0204526	-0.00620222	-0.0413733	0.786506	0.919665	0.452141	0.881702	0.983454	0.725782
ARHGEF10	4	0.0127369	-0.0374575	-0.0906835	0.887253	0.470275	0.0439134	0.939872	0.795946	0.237805
ARHGEF10L	2	-0.0999905	0.115983	0.105482	0.0759287	0.428354	0.785755	0.271511	0.774928	0.92196
ARHGEF11	8	-0.00356218	-0.0802832	-0.0500158	0.965648	0.246964	0.24863	0.983776	0.661221	0.541491
ARHGEF12	14	0.0485825	0.0560057	0.0592641	0.218471	0.229045	0.211703	0.444675	0.649382	0.501501
ARHGEF16	19	0.0396302	0.0318878	0.0219205	0.373026	0.321784	0.361073	0.587479	0.711196	0.650252
ARHGEF17	6	0.0108162	-0.0361536	-0.00699955	0.526514	0.516244	0.494818	0.710066	0.820469	0.754764
ARHGEF2	9	0.0254434	0.0241139	-0.0432414	0.484372	0.794901	0.461313	0.677541	0.937272	0.732116
ARHGEF26	1	-0.380264	-0.0901313	0.0565769	0.0366724	0.527848	0.926271	0.215716	0.827667	0.974583
ARHGEF28	3	0.230405	0.0979177	0.0210532	0.220862	0.678352	0.76985	0.447649	0.892495	0.915595
ARHGEF39	1	-0.0213703	0.0385152	-0.00121485	0.859842	0.268578	0.992565	0.92425	0.677245	0.996834
ARHGEF40	2	0.367112	0.186235	0.0436233	0.383954	0.79897	0.976045	0.594963	0.938546	0.993076
ARHGEF5	13	0.232713	0.0893343	-0.0195655	0.239286	0.956721	0.274866	0.465876	0.993597	0.570153
ARHGEF7	12	0.285921	0.121384	0.0807172	0.041721	0.37298	0.433572	0.223367	0.744607	0.71035
ARID1A	23	0.0935709	-0.0311702	-0.00928668	0.0870317	0.649863	0.796337	0.285558	0.878961	0.926635
ARID1B	5	-0.0889184	0.024823	0.042554	0.190932	0.765048	0.967672	0.41469	0.929004	0.989958
ARID2	16	0.12848	-0.0122112	-0.0457338	0.0408418	0.848682	0.428853	0.222651	0.95705	0.706587
ARID3A	3	0.232808	0.165969	0.17439	0.0589591	0.101701	0.164017	0.244883	0.528292	0.44316
ARID4A	7	0.0145124	0.0358625	0.206455	0.789079	0.57048	0.0346029	0.883189	0.847853	0.210715
ARID4B	4	-0.275534	-0.0776408	0.0702342	0.195759	0.597411	0.488682	0.420089	0.858756	0.751159
ARID5B	6	0.178445	0.051279	0.171705	0.0402089	0.318711	0.0429933	0.222651	0.709165	0.234928
ARIH1	9	-0.203465	-0.0604405	-0.0224841	0.0305602	0.524165	0.876342	0.20822	0.826015	0.956122
ARIH2	6	0.137922	0.139557	0.182095	0.250387	0.277944	0.166202	0.476651	0.679948	0.445789
ARL1	4	-0.0228755	0.12833	0.0936507	0.945301	0.397395	0.389752	0.972681	0.759921	0.676546
ARL14EP	4	0.0205766	0.0167931	0.0316157	0.986164	0.872093	0.873454	0.993642	0.963329	0.955677
ARL15	2	0.197077	-0.00498348	0.0415355	0.00747962	0.728709	0.560115	0.150726	0.91397	0.796788
ARL2	3	-0.0816287	0.0769973	0.00930645	0.0424975	0.318983	0.811821	0.223601	0.709199	0.932015
ARL3	9	-0.131592	0.0459243	0.150305	0.0647601	0.720618	0.0545205	0.25338	0.910113	0.263696
ARL6IP1	3	-0.131626	-0.200309	-0.0311542	0.596887	0.130942	0.853415	0.759778	0.554311	0.947474
ARL6IP4	6	0.0506474	0.00633439	0.0737859	0.930442	0.984611	0.316416	0.96548	0.99795	0.60904
ARL6IP5	2	0.0176621	-0.056009	-0.0705311	0.416234	0.203415	0.106486	0.621969	0.630539	0.362929
ARL6IP6	1	0.377723	0.115732	0.123162	0.0826185	0.748827	0.74781	0.279973	0.92117	0.903612
ARL8A	5	-0.123571	0.02234	0.0229154	0.0860296	0.731103	0.688827	0.283599	0.915259	0.871544
ARL8B	1	0.000937085	0.0289098	0.221625	0.578127	0.564816	0.0203898	0.746865	0.84555	0.164873
ARMC1	6	0.230021	0.0621409	-0.0691193	0.116348	0.883616	0.201571	0.324064	0.96886	0.489595
ARMC10	8	0.0717811	0.106715	0.0841418	0.19435	0.221866	0.144762	0.419161	0.645537	0.415486
ARMC5	3	-0.0365828	-0.15539	-0.342006	0.968984	0.071007	0.00927574	0.984852	0.488317	0.11218
ARMC6	9	0.154736	0.109028	0.0519982	0.458885	0.563664	0.812444	0.654967	0.845442	0.932067
ARMC8	6	0.00961675	0.0217909	0.0396789	0.917672	0.540345	0.359976	0.95968	0.833071	0.64858
ARMC9	3	0.142184	0.137613	0.0625247	0.530646	0.38454	0.587492	0.713267	0.750384	0.814534
ARMCX1	3	-0.0692242	-0.010941	0.0890522	0.824602	0.598324	0.0951239	0.902957	0.858756	0.345338
ARMCX3	5	0.233586	0.0982393	0.127039	0.0382387	0.268768	0.0635093	0.2171	0.677407	0.284371
ARMCX5	1	-0.0214176	-0.0983169	-0.142159	0.967926	0.962656	0.967047	0.9845	0.994702	0.989914
ARMH3	5	-0.195505	-0.0459389	0.0402614	0.0574898	0.82216	0.261819	0.243415	0.946387	0.557188
ARMT1	15	-0.109819	-0.153846	-0.0746722	0.0637421	0.183986	0.376166	0.252163	0.61323	0.664848
ARNT	3	-0.10375	-0.118171	-0.145187	0.990798	0.288171	0.133535	0.996127	0.684395	0.399932
ARPC1A	9	0.0848474	0.136037	0.118343	0.231065	0.131748	0.148169	0.457264	0.554311	0.421155
ARPC1B	14	-0.199327	-0.0806064	0.0212626	0.111628	0.320537	0.710798	0.317536	0.710399	0.883268
ARPC2	14	-0.0323915	0.127358	0.198349	0.368109	0.050413	0.00147079	0.58377	0.454064	0.0468342
ARPC3	7	0.0581121	0.0805693	0.250077	0.329285	0.126747	0.000183386	0.548761	0.552158	0.0162679
ARPC4	6	0.0235633	0.0271218	0.119913	0.900123	0.605904	0.0589455	0.948351	0.862253	0.273416
ARPC5	7	-0.0934271	-0.0503286	0.00105197	0.14034	0.141515	0.775032	0.354811	0.562992	0.917772
ARPC5L	5	-0.0566733	-0.126543	-0.113075	0.311865	0.144112	0.0087789	0.532985	0.565925	0.108852
ARPIN	1	0.155153	0.206538	0.258073	0.446059	0.318154	0.0919223	0.644982	0.708985	0.340227
ARPP19	4	-0.142088	-0.314717	-0.399287	0.271771	0.171322	0.0213658	0.496743	0.5993	0.168867
ARRB2	2	-0.317083	-0.0105925	0.11262	0.0654772	0.910677	0.109714	0.253806	0.979438	0.367749
ARRDC1	5	0.0544278	0.0831085	0.158867	0.643141	0.0585363	0.00110488	0.788737	0.471842	0.0406827
ARRDC3	2	0.479498	0.481267	0.55206	8.34654e-05	0.000159275	1.11725e-05	0.0287331	0.0687294	0.00430475
ARSA	1	0.181912	0.0753706	-0.0266363	0.094172	0.494529	0.852837	0.294039	0.809536	0.947449
ARSB	2	-0.286474	0.125428	0.0400066	0.0652027	0.373986	0.549686	0.25338	0.745221	0.790499
ARSD	7	0.452899	0.1657	0.0681665	0.0373201	0.479436	0.900613	0.216461	0.801939	0.964978
ARVCF	7	0.0830805	0.0557942	0.0377765	0.201543	0.251816	0.471216	0.424936	0.665556	0.737701
ASAH1	8	0.0573978	0.0102356	0.144804	0.900604	0.608328	0.0180854	0.948614	0.863788	0.155656
ASAP1	6	-0.0509693	-0.00710816	0.0426122	0.872096	0.702969	0.364712	0.932358	0.905412	0.653711
ASAP2	6	0.400043	0.239537	0.0531291	0.0515531	0.191022	0.736035	0.236432	0.617344	0.89873
ASB1	1	-0.0465168	0.317596	0.131645	0.651611	0.245404	0.984023	0.793884	0.661221	0.994127
ASB6	1	-0.11903	-0.312909	-0.458888	0.276078	0.0725247	0.000779188	0.500226	0.490672	0.035231
ASCC1	3	-0.00866875	0.0550067	0.137653	0.423198	0.971648	0.22116	0.62783	0.99589	0.510258
ASCC2	8	-0.118579	-0.0535296	-0.0618283	0.252655	0.438463	0.57527	0.478486	0.778798	0.805329
ASCC3	21	0.0692554	0.135863	0.0336864	0.144494	0.0327369	0.330537	0.360581	0.428432	0.621856
ASDURF	2	-0.347822	-0.126146	-0.156419	0.00129935	0.0436193	0.0526407	0.0964871	0.443639	0.259994
ASF1A	3	-0.134116	-0.0235164	0.110173	0.108311	0.411693	0.105129	0.314316	0.770073	0.361016
ASF1B	4	-0.103023	-0.126493	-0.0828202	0.0897588	0.0138837	0.147049	0.289165	0.359999	0.419198
ASH1L	2	-0.16692	-0.281132	-0.345929	0.361783	0.114403	0.0261104	0.578745	0.540119	0.184594
ASH2L	9	0.135457	0.0586133	0.0693534	0.0108173	0.167246	0.0872702	0.156984	0.595318	0.3304
ASL	12	-0.074504	0.0321825	0.060928	0.141678	0.559419	0.342516	0.35651	0.843796	0.633775
ASMTL	15	-0.124938	0.00415574	0.0604184	0.0657351	0.873462	0.186737	0.254172	0.963329	0.47184
ASNS	12	-0.244873	-0.117358	-0.106124	0.000897459	0.0615634	0.0397087	0.0833231	0.476313	0.225807
ASPH	13	0.0204266	-0.0227709	-0.0214825	0.35059	0.610963	0.84094	0.568409	0.8646	0.942175
ASPM	4	0.00976206	0.00695494	-0.0255761	0.867465	0.889664	0.532514	0.929948	0.970932	0.779699
ASPSCR1	10	-0.101327	-0.0494183	-0.0924266	0.173336	0.392172	0.084781	0.393701	0.754389	0.326172
ASRGL1	4	0.0651522	0.100314	0.120328	0.936697	0.247812	0.25605	0.967974	0.661783	0.550996
ASS1	10	-0.0296522	0.0981519	0.115379	0.403081	0.0619672	0.00460065	0.612289	0.476736	0.0788739
ASXL2	4	-0.0582395	-0.0180723	0.062631	0.413871	0.630827	0.260802	0.620225	0.872895	0.555622
ATAD1	8	0.221697	0.126861	0.132833	0.0107353	0.135733	0.0593835	0.156976	0.554972	0.274324
ATAD2	34	0.0706929	0.013785	-0.00795373	0.179583	0.599906	0.935074	0.402052	0.859015	0.976524
ATAD2B	14	0.229395	0.0265997	0.0401433	0.0357858	0.72707	0.790618	0.214947	0.913401	0.925068
ATAD3A	24	0.0614041	0.0300778	0.0813313	0.304562	0.445081	0.120055	0.525634	0.78193	0.383652
ATAD3B	1	-0.151113	-0.066425	0.0357217	0.906584	0.856929	0.193968	0.952569	0.959986	0.480926
ATAT1	1	0.298642	0.308429	0.13164	0.454987	0.204209	0.470332	0.65206	0.630969	0.737022
ATE1	2	-0.0953344	-0.0443556	-0.0246852	0.114387	0.711378	0.724882	0.321235	0.907746	0.890189
ATF1	1	0.0139785	0.145293	0.0652237	0.936676	0.116822	0.448843	0.967974	0.54229	0.722688
ATF2	2	-0.211161	-0.171158	-0.0960051	0.0763658	0.20783	0.653117	0.27227	0.633083	0.850352
ATF6	1	-0.359744	-0.163896	-0.212062	0.00319284	0.112004	0.0988776	0.126825	0.536516	0.351129
ATF6B	2	0.0816511	-0.407002	-0.144464	0.644386	0.0257158	0.360262	0.789858	0.407664	0.648943
ATF7	2	-0.128468	-0.25915	-0.191306	0.339518	0.0440166	0.0700587	0.557732	0.443639	0.298437
ATF7IP	4	-0.0904993	0.161616	-0.130271	0.232625	0.0245357	0.0364335	0.458569	0.403707	0.216438
ATG10	1	-0.314386	-0.0917816	-0.21664	0.00616467	0.176756	0.0377739	0.146169	0.605287	0.220703
ATG101	2	0.351534	-0.155055	0.0588412	0.433065	0.776695	0.92802	0.635676	0.932276	0.974965
ATG12	2	-0.0540692	-0.0797146	0.0478796	0.765861	0.570289	0.141879	0.869485	0.847853	0.411488
ATG13	2	0.583845	0.329014	0.219901	0.0010529	0.0141459	0.0711955	0.0881921	0.362155	0.301446
ATG16L1	9	-0.237114	-0.0208665	-0.0633436	0.0087537	0.604937	0.0676178	0.153964	0.861461	0.293076
ATG16L2	1	0.516042	0	0.951715	0.389465	0.275951	0.121992	0.599884	0.679382	0.386861
ATG2A	4	0.0543614	0.0334009	-0.0405027	0.83568	0.900553	0.272547	0.909313	0.974607	0.569061
ATG2B	9	0.146142	0.0101114	-0.0321881	0.24546	0.883486	0.2883	0.471816	0.968855	0.583025
ATG3	9	-0.0436705	-0.0599055	-0.0404821	0.740345	0.758111	0.462364	0.853058	0.925923	0.73282
ATG4B	2	-0.128725	-0.0102917	0.0479226	0.556574	0.520034	0.327598	0.73365	0.82184	0.619045
ATG5	5	-0.14829	-0.0125437	0.0150344	0.249765	0.627937	0.482002	0.476382	0.872561	0.746024
ATG7	10	0.0325523	0.109002	0.0798848	0.673273	0.555016	0.672901	0.808263	0.841588	0.862361
ATG9A	9	0.418341	0.149034	0.0827709	0.0186468	0.216652	0.609377	0.179428	0.64093	0.825718
ATIC	37	-0.108285	-0.122413	-0.0663267	0.031046	0.0281069	0.122661	0.208942	0.418555	0.387897
ATL2	12	0.136133	-0.00248993	0.021071	0.0501248	0.803203	0.518097	0.233616	0.939985	0.770299
ATL3	17	-0.111183	-0.185556	-0.182633	0.372031	0.0747192	0.0909772	0.586512	0.495064	0.337865
ATN1	1	-0.264856	-0.0144136	-0.0020047	0.101561	0.492139	0.891086	0.305656	0.808819	0.96281
ATOX1	3	-0.296594	-0.21113	-0.0655396	0.0586533	0.0914616	0.707126	0.244883	0.517964	0.880735
ATP11A	1	-0.0430383	-0.0423453	-0.0109807	0.698856	0.786075	0.923032	0.825431	0.934643	0.973364
ATP11B	3	0.0237755	-0.0410136	0.0824079	0.712234	0.952081	0.0966927	0.83335	0.991576	0.347697
ATP11C	8	0.12882	0.10168	0.0755888	0.0165833	0.0779363	0.0790085	0.172773	0.498219	0.316609
ATP13A1	25	0.0861031	0.0397386	0.065037	0.129698	0.44171	0.129944	0.339453	0.780112	0.395913
ATP13A2	3	0.235073	0.159836	0.0578814	0.128599	0.099977	0.876156	0.338083	0.527593	0.956122
ATP13A3	2	-0.00396564	-0.0639627	-0.0338658	0.773288	0.355131	0.743777	0.874388	0.732752	0.901896
ATP1A1	46	-0.0376118	-0.0779665	-0.0372784	0.795046	0.167087	0.406442	0.886246	0.595318	0.691568
ATP1B1	12	-0.087081	-0.181499	-0.079027	0.433398	0.0647109	0.317113	0.636025	0.479266	0.609242
ATP1B3	9	-0.0757617	-0.0514663	-0.0579429	0.597283	0.422115	0.624665	0.759778	0.774928	0.835706
ATP2A2	26	-0.130172	-0.0063764	0.0854261	0.355898	0.941125	0.259844	0.573875	0.988457	0.554824
ATP2A3	30	-0.0659635	-0.100599	-0.00635042	0.616873	0.352484	0.712033	0.77232	0.730168	0.883557
ATP2B1	23	0.0604741	-0.0304894	0.052915	0.156303	0.529661	0.173255	0.37328	0.828597	0.454658
ATP2B4	3	0.221514	0.116222	-0.0131751	0.0241595	0.104067	0.999477	0.192524	0.528336	1
ATP2C1	9	0.1059	0.0129934	0.0343173	0.0965375	0.80119	0.945461	0.297448	0.939548	0.980874
ATP2C2	2	0.132905	0.138784	0.114862	0.0833015	0.0942307	0.219264	0.281236	0.521858	0.508623
ATP5F1A	32	0.129017	0.0734117	0.143693	0.0227059	0.174529	0.00870247	0.188347	0.602199	0.108593
ATP5F1B	25	0.154471	-0.055115	-0.00637014	0.0332081	0.488658	0.79148	0.212376	0.806927	0.925375
ATP5F1C	12	0.0237217	0.0219043	0.0637835	0.571723	0.483561	0.127971	0.742486	0.803087	0.393769
ATP5F1D	3	0.114414	0.0337366	0.0494525	0.155353	0.699904	0.305552	0.372407	0.90399	0.599131
ATP5F1E	3	-0.232209	-0.0569599	-0.0568931	0.229783	0.680597	0.712742	0.455898	0.892712	0.883569
ATP5IF1	8	-0.0329309	-0.0580594	-0.0442956	0.674249	0.41009	0.648897	0.809183	0.76908	0.849108
ATP5MC1	1	0.00572559	0.0696727	0.134892	0.963637	0.626466	0.171731	0.982715	0.872094	0.452432
ATP5ME	4	0.0759332	0.0263725	0.0504906	0.163002	0.818634	0.456645	0.382344	0.945208	0.729765
ATP5MF	2	0.366463	0.00171736	-0.129814	0.434557	0.900418	0.463123	0.636876	0.974607	0.733409
ATP5MG	4	0.00653188	0.0135157	0.0562056	0.87817	0.984886	0.69139	0.934806	0.997966	0.872989
ATP5MJ	2	0.0434514	0.102502	0.17435	0.283023	0.124281	0.0770076	0.50744	0.55136	0.311998
ATP5MK	1	0.168533	-0.0874684	-0.0976043	0.0043199	0.381187	0.0277925	0.135134	0.749144	0.18953
ATP5PB	13	-0.0504397	-0.028369	0.0170535	0.923111	0.724992	0.442026	0.962448	0.913023	0.717201
ATP5PD	13	-0.146933	-0.134958	-0.0444675	0.223571	0.504758	0.73627	0.44971	0.813412	0.898875
ATP5PF	5	0.0652237	0.148999	0.279859	0.379836	0.119522	0.00868432	0.59118	0.546386	0.108593
ATP5PO	9	-0.106323	-0.110099	-0.0308237	0.338627	0.188047	0.784761	0.557065	0.613848	0.921714
ATP6AP1	6	0.0624065	-0.0512224	-0.00146068	0.214386	0.996885	0.712435	0.439791	0.999771	0.883557
ATP6AP2	5	-0.0148013	0.0591642	0.0559159	0.943235	0.480363	0.385843	0.971864	0.801969	0.673608
ATP6V0A1	10	0.0904471	0.0607661	0.0480464	0.187817	0.323974	0.330168	0.411287	0.71168	0.621464
ATP6V0A2	7	0.085104	0.0494658	0.0753599	0.161602	0.294041	0.0845355	0.380859	0.689764	0.325852
ATP6V0C	1	-0.213379	-0.214385	-0.238017	0.377071	0.515459	0.508785	0.589289	0.82018	0.765013
ATP6V0D1	8	0.100136	0.140132	0.192585	0.0841046	0.0312365	0.00957657	0.28228	0.428071	0.113632
ATP6V1A	22	0.0122424	-0.0390507	0.0280736	0.805971	0.64153	0.279271	0.893629	0.877463	0.573883
ATP6V1B2	12	0.249884	0.141017	0.0827668	0.0327933	0.208153	0.439068	0.212044	0.633083	0.71591
ATP6V1C1	19	-0.0496859	0.04058	0.224258	0.518757	0.569707	0.0131965	0.704366	0.847551	0.133982
ATP6V1D	4	-0.00150417	0.102129	0.0394124	0.927886	0.181161	0.307557	0.964356	0.609085	0.600809
ATP6V1E1	14	-0.318602	-0.227253	-0.120064	0.00994981	0.106176	0.120146	0.15617	0.53145	0.383689
ATP6V1F	4	0.0732085	-0.0737287	-0.0690036	0.439725	0.878379	0.536271	0.640431	0.966693	0.782741
ATP6V1G1	5	-0.0647948	-0.147363	-0.0948612	0.362454	0.102056	0.138032	0.578745	0.528292	0.405373
ATP6V1H	9	0.166299	0.111803	-0.0103859	0.25782	0.30197	0.781696	0.482919	0.696326	0.92013
ATP7A	5	0.177438	0.229881	0.11682	0.0560101	0.0106873	0.121845	0.240581	0.344213	0.386712
ATP8B1	10	0.182961	0.0170813	0.141675	0.0097463	0.719609	0.00463	0.15617	0.909216	0.0789354
ATP9A	14	0.00149428	0.100412	0.0408228	0.561691	0.256609	0.177299	0.735358	0.666773	0.461266
ATPAF1	3	0.0160963	-0.0436037	0.0576548	0.797303	0.185447	0.186521	0.887479	0.613688	0.47184
ATPAF2	6	-0.25736	-0.137991	0.0887203	0.414554	0.977231	0.149951	0.620598	0.99704	0.423113
ATR	7	0.0652048	-0.024282	-0.0641505	0.303854	0.900022	0.309224	0.525	0.974607	0.60189
ATRAID	1	0.194954	-0.0599102	-0.0494645	0.19524	0.567872	0.305001	0.420022	0.846146	0.598812
ATRIP	3	0.319475	0.186854	0.20209	0.0964809	0.224904	0.141527	0.297393	0.647943	0.410929
ATRN	3	0.0252816	0.158425	0.0111759	0.711428	0.067562	0.786573	0.833044	0.480745	0.922338
ATRX	23	-0.082978	-0.0548324	-0.0429414	0.243985	0.26372	0.255095	0.471656	0.6727	0.550017
ATXN1	11	0.285874	0.130356	0.0953865	0.0376665	0.318271	0.588737	0.216461	0.708985	0.814946
ATXN10	12	-0.128556	-0.0581602	-0.0303112	0.033322	0.63177	0.953538	0.212496	0.873748	0.9834
ATXN1L	4	0.0873724	0.107823	0.0374422	0.286609	0.0684178	0.635915	0.509954	0.482819	0.842276
ATXN2	11	-0.0742001	-0.0588084	-0.0348965	0.220813	0.429953	0.671418	0.447649	0.774928	0.862067
ATXN2L	27	-0.244527	-0.189344	-0.184945	0.00828875	0.0240829	0.0162428	0.153964	0.402811	0.146446
ATXN3	6	0.035036	0.0404708	0.0864307	0.503725	0.239322	0.0703585	0.692173	0.656343	0.299053
ATXN7	4	-0.0403974	-0.104269	-0.153582	0.384696	0.105737	0.0240189	0.595753	0.53145	0.17814
ATXN7L2	1	0.0451247	-0.131625	-0.105159	0.56423	0.507995	0.545418	0.737067	0.814371	0.788124
ATXN7L3	1	0.177843	0.206705	-0.309555	0.795752	0.777061	0.0862435	0.886521	0.932373	0.328843
ATXN7L3B	2	-0.200214	-0.0988035	-0.0335151	0.134225	0.508215	0.871283	0.345585	0.814371	0.954709
AUH	1	0.503949	0.175127	0.165275	0.0545794	0.562394	0.415687	0.238559	0.845277	0.698949
AUP1	7	0.0161548	-0.0859281	-0.0519995	0.707996	0.458699	0.377543	0.83086	0.790061	0.666212
AURKA	8	-0.356442	-0.279601	-0.360159	0.00464887	0.0155594	0.00269925	0.138317	0.371764	0.0617224
AURKB	6	0.449496	0.179907	-0.00111424	0.0616681	0.492817	0.777652	0.248934	0.808841	0.918711
AVEN	3	-0.128128	-0.0588581	-0.184692	0.315944	0.438524	0.0740137	0.537138	0.778798	0.306884
AVL9	7	0.0735561	0.156259	0.183565	0.391872	0.481505	0.0258345	0.601069	0.801969	0.184207
AXIN1	2	-0.15864	-0.259403	-0.238933	0.0369455	0.00976063	0.0120402	0.21644	0.344213	0.127476
AZI2	4	-0.115957	0.0523085	-0.0709372	0.192048	0.391188	0.32737	0.415942	0.754321	0.618909
B2M	2	0.190087	0.217298	0.150516	0.0222286	0.147824	0.106388	0.187206	0.57405	0.362902
B3GALNT1	4	0.305677	0.226731	0.054697	0.0331805	0.253361	0.497615	0.212376	0.666168	0.756485
B3GALNT2	1	0.0897217	0.159501	0.0776558	0.54778	0.304126	0.726878	0.726805	0.69833	0.891242
B3GALT4	1	0.0277935	0.0884278	0.0498991	0.812794	0.839284	0.544193	0.897319	0.954053	0.787238
B3GALT6	3	0.0962321	0.136954	0.0768462	0.131557	0.0916822	0.184484	0.341787	0.517964	0.469185
B3GAT3	8	0.277199	0.0372614	0.0700493	0.0515773	0.931181	0.461012	0.236432	0.986077	0.732116
B3GLCT	3	0.307307	0.215997	0.173617	0.00211075	0.0396966	0.0227317	0.112955	0.431686	0.172073
B4GALNT1	2	0.279261	-0.00120162	-0.0879034	0.0419636	0.815948	0.7127	0.223601	0.944799	0.883569
B4GALT1	1	0.201572	0.158306	-0.112324	0.582448	0.936836	0.155909	0.750763	0.987763	0.432949
B4GALT3	2	0.00300898	0.00118142	-0.122127	0.436095	0.979861	0.152818	0.638142	0.99704	0.428287
B4GALT4	2	0.115991	0.0846882	0.017435	0.105263	0.221349	0.928535	0.309839	0.645537	0.974965
B4GALT5	1	0.0629941	-0.138743	-0.140133	0.575734	0.167881	0.0268483	0.745279	0.595903	0.186845
B4GALT7	3	0.0344759	-0.0215224	-0.0725677	0.434878	0.504506	0.0520583	0.637226	0.813331	0.259687
B4GAT1	3	-0.0989655	0.0181708	0.0311386	0.672229	0.447008	0.265673	0.808	0.783229	0.560897
B9D2	1	0.616519	0.363206	0.314667	0.102224	0.187397	0.269639	0.306394	0.613848	0.56694
BABAM1	4	-0.199747	0.0112575	0.134146	0.2774	0.694229	0.0788977	0.501441	0.89987	0.316361
BABAM2	3	0.0873088	0.168683	0.206948	0.2499	0.0458396	0.00647534	0.47643	0.444443	0.0948649
BACE1	1	-0.000155295	0.0740336	-0.0635766	0.496247	0.525503	0.218256	0.686796	0.82714	0.507202
BACE2	2	0.0930842	-0.00995903	-0.0211607	0.934694	0.28963	0.247223	0.967004	0.685016	0.541067
BAD	4	0.742983	0.388909	0.22326	0.0120661	0.154703	0.49996	0.162097	0.578991	0.758106
BAG1	4	-0.037651	-0.00930275	-0.0402098	0.797139	0.758925	0.767143	0.887425	0.926239	0.913924
BAG2	8	-0.235844	-0.20135	-0.140004	0.0395561	0.00155094	0.0240133	0.220884	0.19244	0.17814
BAG3	30	-0.0946018	-0.0637256	0.00803276	0.0747559	0.277627	0.889956	0.269497	0.679821	0.96281
BAG4	4	0.14987	0.033414	0.0718975	0.323025	0.518159	0.490692	0.543857	0.821329	0.752042
BAG5	15	-0.00708797	0.0186926	0.158636	0.941721	0.678976	0.0082636	0.971083	0.892495	0.105822
BAG6	26	0.201374	0.118038	0.0807746	0.148957	0.383627	0.737875	0.366261	0.750027	0.899871
BAHCC1	1	0.412474	0.218323	0.365557	0.00241322	0.186379	0.0294312	0.118382	0.613848	0.194153
BAHD1	3	-0.180986	-0.108533	-0.0961091	0.0593214	0.197109	0.0727472	0.245218	0.622703	0.304704
BAIAP2	20	-0.129978	-0.138376	-0.190243	0.0219902	0.0177598	0.00174422	0.187206	0.388296	0.0517143
BAIAP2L1	11	-0.185739	-0.130088	-0.0710698	0.0492208	0.132349	0.209862	0.232128	0.554505	0.499752
BAK1	4	0.0528016	-0.056699	-0.227199	0.301622	0.145306	0.000402242	0.522679	0.568495	0.0244069
BAMBI	3	0.0295193	0.334084	0.278055	0.429409	0.0210487	0.0052543	0.632709	0.39465	0.0845023
BANF1	6	-0.166313	-0.252959	-0.052341	0.0768904	0.031563	0.358854	0.272654	0.428071	0.647466
BANP	4	0.178809	0.0274648	0.0351647	0.0517506	0.666486	0.603401	0.236432	0.886272	0.822393
BAP1	4	0.270653	0.236357	-0.0183409	0.0917499	0.0196461	0.716175	0.290831	0.390799	0.885335
BAP18	5	-0.283838	-0.151126	-0.06978	0.214817	0.51999	0.953746	0.440378	0.82184	0.983482
BARD1	4	-0.0875534	-0.0659936	-0.116193	0.120007	0.547924	0.179632	0.328168	0.836762	0.463609
BARGIN	4	0.0141613	0.0381083	0.00829664	0.59624	0.745668	0.956833	0.759442	0.91968	0.985186
BASP1	19	-0.295333	-0.0303021	0.0851743	0.166232	0.788854	0.243395	0.384824	0.93522	0.53604
BAX	5	0.110747	0.106444	0.150292	0.670503	0.0544803	0.0105146	0.807075	0.461864	0.117662
BAZ1A	23	-0.179323	-0.113666	-0.0980971	0.0179644	0.107043	0.0885873	0.176357	0.532122	0.332455
BAZ1B	42	0.030133	0.0239171	-0.00478954	0.554578	0.803695	0.602755	0.732279	0.939985	0.822393
BAZ2A	9	-0.137953	-0.0332446	-0.00481897	0.138891	0.42196	0.768805	0.352534	0.774928	0.914684
BAZ2B	3	0.075671	0.0835789	-0.0132241	0.173866	0.347745	0.57131	0.394503	0.726969	0.802791
BBC3	2	0.33274	0.0708868	0.0425529	0.10268	0.918112	0.768303	0.307109	0.982946	0.914228
BBS9	1	0.0389523	0.0860348	0.0551563	0.208807	0.154188	0.132738	0.432932	0.578991	0.398921
BBX	3	0.00195017	-0.0781245	0.0310865	0.502058	0.864612	0.39331	0.691238	0.962261	0.680019
BCAM	12	0.0497747	-0.0230753	-0.0197713	0.438119	0.640969	0.858417	0.639251	0.877412	0.950153
BCAP29	9	-0.268391	-0.162532	-0.0612978	0.129112	0.158453	0.741815	0.338875	0.58451	0.900843
BCAP31	18	-0.117238	-0.108348	0.000327332	0.647959	0.38058	0.64187	0.791813	0.749144	0.845187
BCAR1	15	-0.162141	-0.0800796	-0.0847435	0.0122382	0.272244	0.102634	0.162097	0.678226	0.357871
BCAS1	14	-0.240176	0.0414071	0.180996	0.0736439	0.744539	0.0612833	0.267471	0.919647	0.277532
BCAS2	12	-0.0469196	-0.0947184	-0.0132279	0.48745	0.15484	0.993746	0.679749	0.57922	0.997584
BCAS3	5	0.345978	0.127334	0.16157	0.156178	0.641365	0.864462	0.37328	0.877463	0.952035
BCAT2	7	0.100216	0.0484593	0.0550199	0.109798	0.296797	0.37984	0.315566	0.6916	0.66843
BCCIP	8	-0.109523	0.142627	-0.0755939	0.511332	0.1426	0.64381	0.698763	0.564522	0.846949
BCKDHA	11	0.0826167	0.0548634	0.132965	0.0955671	0.276919	0.0471345	0.295946	0.679382	0.24625
BCKDHB	2	-0.00924342	-0.0408953	0.149282	0.70136	0.994715	0.0649179	0.827241	0.999402	0.286846
BCKDK	5	0.341252	0.166993	0.116655	0.0382587	0.31166	0.469807	0.2171	0.70471	0.737022
BCL10	1	-0.137138	-0.12896	0.0303347	0.281971	0.313256	0.798676	0.506426	0.706342	0.927864
BCL2L1	2	0.118799	0.191556	0.163381	0.421251	0.323135	0.255949	0.626188	0.71168	0.550946
BCL2L11	3	0.178731	0.0635865	0.0590951	0.0188127	0.341928	0.469903	0.180536	0.722484	0.737022
BCL2L12	6	-0.138813	-0.178089	-0.175377	0.264621	0.142065	0.0285961	0.490538	0.564339	0.192288
BCL2L13	9	-0.065813	-0.212781	-0.159226	0.316396	0.0245759	0.00669342	0.537322	0.403707	0.0962304
BCL2L2	1	0.387923	0.15858	0.0453243	0.0668421	0.0323889	0.271794	0.256006	0.428432	0.569061
BCL3	3	-0.234159	-0.222788	-0.35224	0.0376025	0.0571089	0.00392472	0.216461	0.467506	0.0727016
BCL7A	3	-0.0882919	-0.0311505	0.0552072	0.576779	0.542846	0.386998	0.746188	0.834464	0.674402
BCL7B	3	0.117028	0.08967	0.0339445	0.0843734	0.162658	0.576773	0.282319	0.591749	0.806206
BCL7C	3	0.256792	0.0877196	0.0431436	0.0163157	0.417355	0.518932	0.172773	0.772829	0.771093
BCL9	1	0.125594	0.186282	0.272473	0.647511	0.481436	0.264596	0.791642	0.801969	0.559698
BCL9L	7	0.0243267	0.0836119	0.0461768	0.851424	0.430404	0.556369	0.918918	0.774928	0.794254
BCLAF1	29	0.133259	0.00595619	0.0401995	0.0236826	0.963427	0.257703	0.19089	0.994702	0.552549
BCLAF3	1	-0.134495	-0.42559	-0.280827	0.647945	0.0670457	0.00758186	0.791813	0.479271	0.101129
BCOR	4	0.0691428	-0.211657	-0.351383	0.974289	0.0265238	0.00257531	0.987358	0.409123	0.0599557
BCORL1	1	-0.00351326	-0.259442	-0.376047	0.454668	0.014015	0.0173455	0.651846	0.359999	0.152237
BCR	6	-0.27921	0.0198257	-0.0266431	0.0128997	0.948717	0.936995	0.165443	0.990753	0.976929
BCS1L	4	-0.0239839	0.0503641	0.0857089	0.692192	0.213956	0.222723	0.821252	0.638555	0.512524
BDH1	7	0.0263539	-0.103662	0.0913762	0.476891	0.298292	0.109206	0.671463	0.693059	0.366846
BDP1	4	-0.269414	-0.0352755	-0.0666121	0.118954	0.629111	0.600518	0.327116	0.872561	0.820917
BECN1	5	0.00488854	0.0210618	-0.023105	0.964122	0.58429	0.771963	0.982871	0.854779	0.915756
BEND3	6	0.0914584	0.0154004	-0.0379747	0.444206	0.713835	0.408421	0.643672	0.908306	0.692813
BET1	2	0.18539	0.190559	0.205378	0.0375214	0.0236516	0.0603393	0.216461	0.402811	0.276696
BET1L	2	-0.135836	-0.0889967	-0.259454	0.390224	0.123713	0.0235959	0.600386	0.550221	0.176534
BICD1	3	-0.266349	-0.12829	-0.367998	0.00118995	0.0956119	0.000689171	0.0955186	0.522913	0.0327824
BICD2	18	-0.168048	-0.0686432	-0.0888835	0.0114981	0.123844	0.170337	0.160267	0.550221	0.450296
BICDL1	2	0.0891735	0.101486	0.205484	0.316424	0.488727	0.148328	0.537322	0.806927	0.421155
BICDL2	2	-0.149954	-0.0624812	-0.181441	0.468383	0.413074	0.196749	0.66341	0.770685	0.483782
BICRA	5	0.0729138	0.0210947	-0.0579702	0.141408	0.637983	0.256732	0.356402	0.876561	0.551542
BICRAL	1	0.378505	-0.0444132	-0.256641	0.418066	0.941656	0.162317	0.623247	0.988629	0.44136
BID	8	-0.209834	-0.0788736	-0.21468	0.00584852	0.140402	0.00428508	0.145224	0.562151	0.0749782
BIN1	2	-0.0290322	-0.101007	-0.169236	0.881963	0.549078	0.280417	0.936403	0.836887	0.574552
BIN3	3	0.0458216	0.0663734	-0.0381082	0.589544	0.206131	0.868776	0.755911	0.632092	0.953926
BIRC2	2	0.193628	0.151864	0.0569823	0.32432	0.395946	0.91704	0.545202	0.758996	0.971369
BIRC5	1	0.214835	-0.0208305	0.229972	0.101082	0.994822	0.546232	0.305106	0.999402	0.788124
BIRC6	23	-0.157068	-0.0482231	-0.0763141	0.0135081	0.296952	0.143179	0.167315	0.691751	0.413236
BLM	6	-0.0929042	-0.0635094	-0.0877618	0.154213	0.312664	0.0861701	0.371829	0.705969	0.328843
BLMH	6	-0.18578	-0.0492467	0.10075	0.268438	0.961605	0.153365	0.494285	0.994514	0.429132
BLOC1S1	5	-0.162169	-0.115956	-0.0462506	0.104529	0.205235	0.67858	0.309121	0.631916	0.865464
BLOC1S2	1	-0.180708	-0.0927996	-0.141487	0.0722978	0.255037	0.149142	0.265447	0.666773	0.42209
BLOC1S3	7	-0.0747111	-0.0334265	-0.144184	0.15382	0.232459	0.0041666	0.371437	0.651392	0.0741208
BLOC1S4	1	-0.0191514	-0.113978	-0.00306167	0.893993	0.445691	0.87783	0.943843	0.782167	0.956395
BLOC1S5	4	0.20956	0.0340749	-0.0482427	0.131239	0.684427	0.513174	0.341433	0.894841	0.767121
BLOC1S6	2	-0.079192	0.0167965	0.00385476	0.665369	0.381185	0.536571	0.803783	0.749144	0.782741
BLVRA	11	0.0810946	0.119767	0.150236	0.11675	0.128897	0.0102584	0.324675	0.55219	0.115938
BLVRB	8	-0.181729	-0.0862722	0.0324094	0.128296	0.427605	0.846278	0.337884	0.774928	0.944621
BLZF1	3	-0.0282856	-0.0197977	-0.150828	0.53142	0.942776	0.0797823	0.713613	0.988978	0.3178
BMI1	1	0.105991	0.0960718	0.0871076	0.110017	0.598669	0.30527	0.31575	0.858756	0.599091
BMP2K	3	-0.0138759	-0.0538012	-0.16733	0.968008	0.512282	0.0348345	0.9845	0.81724	0.211658
BMP5	1	0	0	0	0.61639	0.70153	0.949714	0.772091	0.904719	0.981822
BMP7	3	-0.399944	-0.499387	-0.722574	0.00137805	0.000222974	6.50331e-06	0.0989633	0.0687294	0.00359834
BMS1	12	0.0259715	-0.0109401	-0.182506	0.71804	0.681314	0.00303963	0.837605	0.892983	0.0661185
BNIP1	11	-0.276506	-0.0430051	0.0295239	0.112536	0.70314	0.672493	0.318361	0.905481	0.862361
BNIP3	3	0.434379	0.258494	0.151954	0.0315589	0.275783	0.457487	0.21063	0.679382	0.730198
BNIP3L	1	1.17857	0.608732	0.293617	0.00707322	0.189742	0.345902	0.150726	0.615697	0.636585
BOD1	6	-0.068454	-0.0770576	-0.100248	0.238584	0.182687	0.0808891	0.465097	0.610489	0.31926
BOD1L1	26	0.0491867	-0.0324977	-0.00649273	0.23225	0.829638	0.878451	0.458569	0.950471	0.956528
BOLA1	3	-0.189581	-0.114032	-0.0375944	0.179745	0.268434	0.920364	0.402181	0.677104	0.972473
BOLA2	5	-0.142656	-0.0390749	-0.0333445	0.0117864	0.469771	0.520048	0.161847	0.795784	0.771774
BOLA3	3	-0.413677	-0.127428	-0.100276	0.0366664	0.353101	0.650117	0.215716	0.730469	0.849618
BOP1	10	0.00681671	0.0318007	0.00702635	0.715462	0.669607	0.732394	0.835483	0.887663	0.895561
BORCS5	5	0.0917339	-0.0193495	0.0610084	0.992555	0.372347	0.797276	0.996352	0.744607	0.926808
BORCS6	6	0.109925	-0.275916	-0.338652	0.148839	0.126299	0.021682	0.366206	0.552158	0.169015
BORCS7	3	-0.157429	-0.050823	-0.028131	0.056241	0.502734	0.4871	0.240775	0.812515	0.749222
BORCS8	2	-0.0719851	0.0406457	0.0284922	0.660449	0.611053	0.919472	0.800979	0.8646	0.972473
BPGM	2	-0.150115	-0.125885	-0.0566239	0.15979	0.196185	0.336147	0.378642	0.622374	0.627204
BPHL	6	0.0023173	-0.0470629	0.0189649	0.544963	0.763141	0.475368	0.724461	0.928597	0.740936
BPNT1	6	0.0691036	0.0298497	0.0895092	0.839794	0.413426	0.264142	0.9116	0.770685	0.55931
BPNT2	8	-0.0315913	-0.0154633	0.0851497	0.61215	0.955832	0.129125	0.770071	0.99321	0.39489
BPTF	40	0.00585405	0.0375466	0.0232568	0.589183	0.563972	0.466245	0.755726	0.845442	0.735406
BRAF	1	-0.0394114	-0.0466101	0.124299	0.441932	0.87213	0.513821	0.642148	0.963329	0.767476
BRAP	8	-0.0755671	-0.025974	0.0290718	0.282748	0.821756	0.25307	0.5073	0.946193	0.546876
BRAT1	14	-0.0394539	-0.00716907	-0.0667671	0.387927	0.646864	0.164742	0.598351	0.87834	0.443784
BRAWNIN	2	-0.170615	-0.0934437	0.0163021	0.318187	0.924184	0.64391	0.539601	0.983805	0.846949
BRCA1	3	-0.368187	-0.379924	-0.24221	0.0348848	0.0543974	0.0572297	0.21403	0.461864	0.27006
BRCA2	4	-0.151934	-0.112344	-0.133182	0.0808625	0.0871116	0.0678864	0.277562	0.508474	0.293591
BRCC3	4	0.0779227	-0.139568	-0.174899	0.253112	0.119888	0.0104094	0.478757	0.546386	0.116931
BRD1	2	-0.0396442	0.0976046	0.0290359	0.278754	0.386843	0.568704	0.503218	0.751743	0.802237
BRD2	7	-0.0525542	-0.0960224	-0.115667	0.493346	0.110447	0.0768267	0.684379	0.536516	0.311757
BRD3	10	-0.0534135	-0.105496	-0.0653561	0.707116	0.32602	0.538832	0.830698	0.71265	0.78436
BRD4	15	0.0723389	-0.00193985	-0.0798152	0.24392	0.947095	0.159764	0.471656	0.990543	0.438277
BRD7	9	0.0369521	0.0498334	-0.00219251	0.499392	0.39705	0.817874	0.689168	0.759921	0.934402
BRD8	12	0.175544	0.0531648	0.0900174	0.0071572	0.220166	0.0374073	0.150726	0.644397	0.219275
BRD9	1	0.192475	-0.0582782	-0.051959	0.37463	0.868774	0.603074	0.588203	0.963329	0.822393
BRF1	1	-0.32093	-0.195633	-0.111474	0.261408	0.610911	0.846747	0.487043	0.8646	0.944646
BRI3BP	3	-0.285493	-0.115024	-0.179625	0.105925	0.165378	0.0892993	0.31072	0.594876	0.333725
BRIP1	16	-0.261035	-0.141673	-0.0538495	0.00800589	0.0609448	0.696783	0.153198	0.473843	0.875392
BRIX1	7	-0.0222769	-0.0585091	-0.114696	0.696942	0.491996	0.386334	0.824097	0.808819	0.674008
BRK1	7	-0.108317	-0.0776221	-0.0171363	0.0157407	0.130361	0.40592	0.172773	0.55348	0.691487
BRMS1	3	0.601281	-0.430086	0.0825719	0.237521	0.454336	0.881903	0.464166	0.787829	0.959066
BRMS1L	6	0.112381	0.154533	0.0785007	0.0498657	0.0203499	0.249389	0.233312	0.392825	0.541991
BROX	6	-0.0464585	0.0443362	0.124481	0.378276	0.488726	0.0780474	0.589961	0.806927	0.314229
BRPF1	9	0.0208342	-0.0642023	-0.0692376	0.410114	0.144827	0.0997397	0.617735	0.567668	0.35192
BRPF3	4	0.0397509	0.0204345	-0.100927	0.578032	0.94249	0.273055	0.746865	0.988813	0.569153
BRWD1	14	-0.0556873	0.0118031	-0.0908292	0.251363	0.572457	0.0741406	0.477329	0.849607	0.307
BSCL2	1	0.197984	0.133813	0.0198412	0.238448	0.104665	0.556799	0.46495	0.530277	0.794701
BSDC1	7	-0.0286988	0.0656854	0.17345	0.92023	0.417476	0.000650128	0.960403	0.772829	0.0315087
BSG	11	0.0342638	-0.12627	-0.0816841	0.498367	0.0543632	0.082007	0.688264	0.461864	0.32076
BSPRY	11	0.374827	0.133181	0.0574259	0.0143503	0.484659	0.827255	0.169668	0.804217	0.93674
BTAF1	11	0.00588885	-0.0128435	0.0398601	0.731978	0.945826	0.374537	0.847704	0.990225	0.66392
BTBD10	1	-0.13607	-0.0459261	-0.434746	0.138397	0.337587	0.00849096	0.351741	0.719228	0.107507
BTD	4	-0.00757739	-0.0546154	0.0735507	0.637531	0.753758	0.198789	0.785297	0.924473	0.486276
BTF3	6	-0.299755	-0.146199	-0.13437	0.000293286	0.021169	0.00825168	0.0481318	0.395768	0.105822
BTF3L4	7	-0.320765	-0.0466792	0.140146	0.072348	0.656449	0.182814	0.265447	0.881813	0.467804
BTN2A1	3	-0.234333	-0.0853412	-0.0840522	0.287385	0.886331	0.965172	0.510627	0.969172	0.98887
BTRC	2	-0.029021	-0.218712	-0.2814	0.53146	0.0485917	0.000680427	0.713613	0.450157	0.0325675
BUB1	3	-0.154189	-0.0615174	-0.137746	0.191969	0.771119	0.0963351	0.415887	0.930837	0.347059
BUB1B	8	-0.204055	-0.0404952	-0.082026	0.00324403	0.577469	0.107485	0.128197	0.851488	0.364399
BUB3	8	-0.176016	0.0127988	0.157697	0.124637	0.381752	0.0143836	0.332567	0.749144	0.139233
BUD13	6	0.284711	0.168451	0.0954181	0.0719956	0.309283	0.439404	0.264947	0.704086	0.715951
BUD23	5	0.144095	0.0253138	-0.0515255	0.319455	0.655749	0.501702	0.540361	0.881577	0.759104
BUD31	6	-0.0875849	-0.104516	-0.061839	0.119505	0.177712	0.461508	0.327929	0.605287	0.732116
BYSL	12	0.111028	-0.0355246	-0.0644179	0.615367	0.278104	0.0861298	0.771813	0.68007	0.328843
BZW1	17	-0.13991	-0.0865078	-0.00857215	0.0269943	0.277417	0.986625	0.201373	0.679535	0.994846
BZW2	19	-0.124101	0.0074509	0.101862	0.232612	0.652431	0.0643748	0.458569	0.879758	0.286557
C11orf52	4	0.27873	0.242925	0.0588278	0.00230415	0.00914866	0.26199	0.116051	0.344213	0.557395
C11orf54	2	-0.160111	-0.0951574	-0.0428071	0.0636421	0.306047	0.46943	0.252147	0.700508	0.737022
C11orf68	5	-0.0966199	-0.030987	-0.057204	0.119154	0.703894	0.426069	0.327343	0.905701	0.70456
C11orf98	6	-0.274554	-0.0839591	-0.0203545	0.0204841	0.258952	0.877152	0.185841	0.669141	0.956329
C12orf29	1	-0.294265	-0.13729	-0.137774	0.0654122	0.347917	0.666265	0.253806	0.726969	0.859065
C12orf4	1	-0.0565503	-0.169168	0.0185084	0.355266	0.164584	0.810364	0.573216	0.594045	0.931345
C12orf57	5	-0.227415	-0.0853761	-0.0512778	0.0495608	0.157742	0.28928	0.23316	0.583281	0.583923
C14orf119	1	-0.38235	-0.191178	-0.254968	6.73408e-05	0.00770199	0.0101549	0.0287331	0.323419	0.115079
C15orf39	1	-0.0116236	-0.234877	-0.296107	0.49622	0.0282909	0.00486188	0.686796	0.418555	0.0812704
C15orf40	2	-0.0276707	0.00669378	0.00967561	0.48383	0.9595	0.808478	0.676984	0.993986	0.930354
C16orf89	1	-0.134582	0.132415	-0.00414644	0.551132	0.0624113	0.815147	0.729664	0.476748	0.933701
C17orf75	5	-0.261023	-0.0200246	-0.0269954	0.14987	0.88479	0.651518	0.3679	0.969017	0.850053
C17orf80	3	-0.0635457	0.0277624	0.0930692	0.519122	0.625626	0.104682	0.70466	0.871803	0.360964
C18orf21	2	-0.0307054	0.0274972	-0.12508	0.933212	0.319849	0.631005	0.967004	0.709883	0.83967
C18orf25	2	-0.492844	-0.0905415	0.111713	0.0516756	0.500382	0.490523	0.236432	0.811635	0.752042
C18orf32	2	0.0465655	0.0204918	-0.0015598	0.543284	0.488691	0.778656	0.723679	0.806927	0.918745
C19orf12	1	-0.163038	-0.0548376	-0.104011	0.141738	0.468187	0.61015	0.35651	0.795784	0.825898
C19orf25	1	0.368283	-0.171227	-0.177797	0.206712	0.377917	0.0766217	0.430827	0.747989	0.311417
C19orf47	4	0.139064	0.169403	0.083191	0.381621	0.236671	0.679631	0.592658	0.653524	0.866028
C19orf53	3	-0.217698	-0.00675855	0.0633195	0.244007	0.855582	0.66239	0.471656	0.959986	0.857158
C19orf54	3	0.131006	0.124992	0.0402375	0.154065	0.199358	0.848459	0.371704	0.626019	0.94524
C1D	3	-0.195459	-0.00832913	0.0259082	0.208882	0.758312	0.404438	0.432932	0.925923	0.690551
C1GALT1	4	-0.0243457	0.0592359	0.0550726	0.889631	0.315711	0.256581	0.940526	0.707047	0.551518
C1GALT1C1	3	-0.0500235	0.0498822	0.110157	0.595548	0.596743	0.238304	0.758937	0.858288	0.529664
C1orf109	2	-0.136438	0.0280347	0.0518933	0.0563617	0.532567	0.671878	0.241023	0.829094	0.862067
C1orf112	1	0.138123	0.212848	-0.0555095	0.0392282	0.00874572	0.34909	0.219849	0.344213	0.63991
C1orf122	2	-0.0136134	-0.0873375	-0.145176	0.896364	0.475468	0.0755119	0.945828	0.800166	0.308735
C1orf131	6	-0.29714	-0.11963	-0.127144	0.0440153	0.19801	0.117054	0.225724	0.624331	0.379357
C1orf159	1	0.136337	-0.186496	-0.191735	0.0929108	0.58154	0.0154015	0.292233	0.853265	0.142478
C1orf174	2	0.104014	0.0853892	0.248225	0.717776	0.54761	0.00142052	0.837551	0.836762	0.0461878
C1orf198	8	-0.199909	-0.035736	-0.0632076	0.0267353	0.469632	0.079148	0.200943	0.795784	0.316674
C1orf21	2	0.1974	-0.0472844	-0.0210378	0.0104501	0.488083	0.671547	0.156211	0.806927	0.862067
C1orf210	1	0.0608138	-0.09901	-0.179554	0.369199	0.881351	0.423424	0.584399	0.968029	0.702909
C1orf226	2	-0.140669	-0.0914358	-0.0157127	0.21516	0.271637	0.516345	0.440503	0.678226	0.769687
C1orf50	2	-0.0902037	-0.0601425	-0.0604362	0.28588	0.692836	0.474966	0.509801	0.898821	0.740711
C1orf52	2	-0.308308	-0.125126	-0.104171	0.0347328	0.202745	0.387357	0.213608	0.629002	0.674605
C1QBP	8	0.0465421	0.0716934	0.119868	0.133868	0.286835	0.00640336	0.345011	0.68382	0.0940317
C20orf27	2	0.191034	0.15167	0.0450702	0.240196	0.526121	0.649723	0.467175	0.827426	0.849325
C2CD2L	8	0.189773	0.145405	0.0156019	0.140673	0.537275	0.598739	0.355239	0.831206	0.819907
C2CD3	1	0.626547	-0.65849	0.635813	0.416612	0.421647	0.075487	0.622414	0.774928	0.308735
C2CD5	6	0.160321	0.130869	0.110943	0.0557649	0.0871651	0.119134	0.240204	0.508474	0.382201
C2orf49	6	-0.130305	-0.141625	-0.210588	0.27573	0.149543	0.0462223	0.500066	0.575328	0.243965
C2orf69	1	0.07843	0.196495	-0.09877	0.276778	0.0667849	0.984593	0.500978	0.479271	0.99427
C3orf14	1	-0.367634	-0.0127775	0.0101169	0.103092	0.863751	0.764142	0.307579	0.961998	0.913225
C3orf38	4	-0.0119768	-0.103388	0.0149738	0.856041	0.458842	0.932973	0.922738	0.790116	0.975905
C4A	2	0.127746	-0.143681	-0.166034	0.158728	0.12248	0.0726759	0.376473	0.549773	0.304704
C4orf3	1	0.575181	0.0146402	0.120588	0.127035	0.822347	0.699826	0.336549	0.946387	0.876796
C4orf47	1	-0.181907	-0.0308533	-0.00510841	0.685431	0.681847	0.309198	0.816283	0.892983	0.60189
C4orf48	1	-0.181246	-0.151005	-0.270822	0.118022	0.744864	0.0349527	0.326679	0.919647	0.211947
C5orf22	2	-0.0191403	-0.160844	-0.259437	0.3963	0.182156	0.0539706	0.605862	0.610489	0.26247
C5orf24	1	0.185025	0.150794	0.189982	0.0521912	0.34115	0.159818	0.236432	0.722114	0.438277
C5orf51	2	-0.208643	-0.296009	-0.380347	0.108203	0.0795866	0.00878615	0.314316	0.498219	0.108852
C6orf120	1	0.125625	0.0389675	0.23835	0.262367	0.408412	0.0355782	0.48824	0.767242	0.214025
C6orf132	6	0.00970562	0.0477419	-0.0719486	0.725525	0.548968	0.577414	0.843196	0.836887	0.806782
C6orf136	1	0.203631	0.398426	0.118027	0.182841	0.0335225	0.344535	0.405926	0.429449	0.635164
C6orf141	1	-0.524866	-0.524866	-0.524866	0.0747221	0.0758564	0.0753769	0.269497	0.497489	0.308735
C6orf89	3	-0.0949176	-0.00640922	-0.089923	0.796339	0.591622	0.537073	0.88688	0.856452	0.783121
C7orf26	2	0.479646	0.449383	0.378217	0.0375674	0.128664	0.0889036	0.216461	0.55219	0.332648
C7orf50	10	0.00614326	-0.0463972	0.0196635	0.846991	0.337092	0.352214	0.916403	0.718969	0.642252
C8orf33	7	0.016836	-0.0256808	-0.100124	0.627099	0.733687	0.0429315	0.778921	0.917079	0.234928
C8orf82	5	0.255067	0.032463	0.0546406	0.025867	0.53088	0.796279	0.197946	0.82884	0.926635
C9orf40	3	-0.0334042	0.00958019	-0.150181	0.432617	0.514613	0.0973649	0.635483	0.819341	0.348671
C9orf64	10	-0.129341	-0.0037998	0.0406376	0.059399	0.608495	0.155131	0.245218	0.863866	0.431878
C9orf78	11	-0.188134	-0.044411	-0.0582775	0.0266272	0.43468	0.275547	0.20038	0.777376	0.570512
CA12	7	0.151394	-0.0478617	-0.0581131	0.104203	0.331417	0.135794	0.308723	0.71311	0.403508
CA2	14	-0.048547	0.0104348	0.0935249	0.630637	0.987363	0.0223471	0.781175	0.998658	0.171422
CA5B	6	0.103328	0.0898692	0.15623	0.184264	0.17458	0.0352445	0.407261	0.602199	0.213323
CA8	3	-0.100422	-0.0443583	-0.133911	0.445559	0.740441	0.0980578	0.644664	0.919407	0.349459
CAAP1	2	-0.151954	-0.0367558	0.0302829	0.293373	0.413432	0.863418	0.516167	0.770685	0.951957
CAB39	10	-0.0883672	-0.0242673	0.041453	0.102568	0.798697	0.149536	0.306947	0.93848	0.422279
CAB39L	2	0.0388802	0.0149089	0.208681	0.876297	0.739642	0.224956	0.934003	0.919064	0.514852
CABIN1	7	0.0527676	0.0241289	-0.0480433	0.455789	0.708929	0.210212	0.653088	0.90729	0.50012
CABLES1	1	-0.138255	0.392668	0.16221	0.442554	0.0209037	0.158399	0.642729	0.393849	0.436538
CACFD1	1	-0.165983	-0.370024	-0.207314	0.0315711	0.0259538	0.0257215	0.21063	0.407664	0.184207
CACNA1H	1	-1.08439	-0.607839	-0.177809	0.175613	0.304764	0.696659	0.39639	0.699047	0.875392
CACNA2D1	1	0.177619	-0.00236403	0.127762	0.120528	0.763327	0.298056	0.328547	0.928597	0.591506
CACNG4	1	0.659488	0.0969337	-0.00206164	0.0516254	0.399176	0.914182	0.236432	0.761497	0.970989
CACTIN	5	-0.00759032	0.00736445	0.0646698	0.507828	0.858097	0.812289	0.69496	0.959986	0.932067
CACUL1	2	-0.19907	0.138755	0.136605	0.326763	0.249267	0.135638	0.546926	0.662653	0.403251
CACYBP	14	-0.0865966	-0.0274653	0.00572094	0.176458	0.378012	0.977483	0.397611	0.747989	0.993076
CAD	49	0.0322094	0.0647902	0.0103138	0.722992	0.427624	0.971001	0.841273	0.774928	0.990891
CADM1	2	-0.313661	-0.174035	-0.193027	0.252608	0.422608	0.25654	0.478486	0.774928	0.551518
CADM4	2	0.969176	0.296239	0.186604	0.0338858	0.662808	0.93367	0.212761	0.884971	0.976376
CADPS2	1	0.0687277	0.0169256	-0.0690551	0.976838	0.870942	0.283101	0.988421	0.963329	0.577901
CALCOCO1	9	0.166934	0.11925	0.182721	0.0747718	0.00720942	0.000827512	0.269497	0.319286	0.035231
CALCOCO2	19	-0.0150516	0.0474862	0.0578005	0.965236	0.381632	0.417044	0.983616	0.749144	0.700012
CALM1	11	-0.0649628	0.0496304	0.148899	0.473279	0.702635	0.0576505	0.668209	0.905412	0.27134
CALML5	9	0.089812	0.1898	0.147006	0.555642	0.0592908	0.077545	0.733055	0.471999	0.313352
CALR	26	0.0977746	0.000757219	0.0339408	0.0612024	0.663622	0.416116	0.247971	0.885638	0.699365
CALU	15	-0.046208	-0.00706685	0.101003	0.757832	0.943968	0.100263	0.864779	0.989824	0.352812
CAMK1	3	-0.208331	-0.124581	-0.126117	0.0185018	0.0899176	0.127334	0.178889	0.515555	0.392966
CAMK1D	1	0.210805	0.221373	0.162716	0.17966	0.422533	0.0256559	0.402108	0.774928	0.184207
CAMK2B	5	-0.0327572	-0.0241163	-0.0293535	0.173588	0.242834	0.413175	0.394127	0.659599	0.696559
CAMK2D	4	-0.228984	0.0294216	-0.0733344	0.00954255	0.723576	0.433078	0.155137	0.912332	0.71017
CAMK2G	1	0.0393861	0.113932	0.162216	0.516245	0.0484943	0.053382	0.702253	0.450157	0.261525
CAMKK2	4	-0.256354	-0.0486823	-0.132631	0.02708	0.30679	0.070697	0.20169	0.701104	0.299753
CAMLG	3	0.0762179	-0.0471576	-0.0650264	0.0888759	0.528005	0.507318	0.288012	0.827667	0.763475
CAMSAP1	10	-0.16198	-0.100837	-0.0496413	0.0282001	0.15624	0.313236	0.203875	0.581355	0.606024
CAMSAP2	10	-0.116481	0.0107301	-0.031431	0.113265	0.499196	0.701754	0.319364	0.810983	0.878161
CAMSAP3	15	0.182984	0.121264	0.0613005	0.0239024	0.0542443	0.123049	0.191298	0.461864	0.388036
CAND1	47	-0.114752	-0.013468	0.0861052	0.155347	0.921983	0.130608	0.372407	0.983588	0.396031
CANT1	13	0.165231	0.0598354	0.054882	0.00274308	0.111782	0.123367	0.118382	0.536516	0.388036
CANX	28	0.0415511	-0.0282954	0.0327078	0.550846	0.557836	0.543496	0.729505	0.842811	0.786838
CAP1	20	-0.107383	-0.0171359	0.0397372	0.231226	0.992432	0.295886	0.457297	0.998838	0.588261
CAP2	6	-0.287693	0.0339908	0.147177	0.0708401	0.57324	0.0873158	0.262197	0.849607	0.3304
CAPG	5	0.1815	0.103209	0.0416092	0.122678	0.642875	0.603086	0.330932	0.87759	0.822393
CAPN1	25	-0.152929	-0.0258628	0.0399558	0.0868522	0.954543	0.345495	0.285287	0.992405	0.63618
CAPN15	2	0.101049	-0.0297875	-0.0280342	0.847629	0.446104	0.342379	0.916619	0.782567	0.633775
CAPN2	9	-0.0315885	-0.00491165	-0.0584722	0.925086	0.564585	0.897979	0.963098	0.845451	0.964167
CAPN5	4	0.289803	0.101979	0.0497712	0.0317758	0.347919	0.69512	0.21063	0.726969	0.874957
CAPN7	8	-0.0491197	0.0249403	-0.0656154	0.328305	0.870412	0.103315	0.548076	0.963329	0.358949
CAPN9	2	-0.0733319	-0.0743925	0.0713724	0.651898	0.96738	0.140864	0.794046	0.995118	0.40993
CAPNS1	7	-0.212951	-0.127336	-0.107578	0.054489	0.352208	0.629488	0.238559	0.73007	0.838544
CAPRIN1	10	-0.244161	-0.168241	-0.179851	0.108642	0.0443917	0.0362709	0.314394	0.443943	0.216438
CAPS	6	-0.0515885	-9.36198e-05	-0.0146086	0.343568	0.97528	0.674736	0.561394	0.996831	0.863279
CAPZA1	9	0.00441736	0.031331	0.145953	0.865558	0.430302	0.00172531	0.92858	0.774928	0.0517143
CAPZA2	10	-0.00521206	-0.0297421	0.0162992	0.976873	0.751354	0.418838	0.988421	0.922846	0.700012
CAPZB	15	0.0239137	-0.0484978	-0.0767632	0.371607	0.135834	0.176328	0.586083	0.554972	0.459918
CARD19	4	0.349035	0.0768164	-0.12726	0.0241712	0.951824	0.207417	0.192524	0.991576	0.496681
CARD8	1	0.25873	0.129701	0.133892	0.447508	0.989851	0.890535	0.645544	0.998838	0.96281
CARHSP1	3	-0.0271399	-0.0730404	-0.0788769	0.414984	0.111631	0.069002	0.620945	0.536516	0.295898
CARM1	6	0.15678	0.0691613	0.191962	0.362421	0.618018	0.103748	0.578745	0.867413	0.359537
CARMIL1	23	-3.85675e-05	0.0543564	0.0747949	0.76495	0.403981	0.229365	0.868785	0.762803	0.519391
CARNMT1	2	0.0114007	0.156432	0.185443	0.981847	0.0168488	0.0649551	0.990943	0.385273	0.286846
CARS1	18	-0.0793327	0.0691153	0.0928185	0.194164	0.434989	0.130311	0.418876	0.777551	0.39602
CARS2	7	0.138493	0.11197	-0.0446782	0.0211204	0.203948	0.204019	0.186343	0.630969	0.491919
CASC3	6	-0.14249	-0.345617	-0.448878	0.14521	0.0205241	0.000402016	0.36143	0.39287	0.0244069
CASD1	1	0.110897	0.125704	0.0247089	0.177239	0.254464	0.494014	0.398882	0.666773	0.754541
CASK	14	0.00544063	-0.0136471	-0.0308492	0.795362	0.902057	0.855245	0.886366	0.975749	0.948549
CASKIN2	15	-0.118378	-0.0263568	-0.028709	0.0584073	0.608256	0.657057	0.244411	0.863788	0.853186
CASP2	4	-0.0537743	-0.0406668	-0.114852	0.262765	0.778348	0.0503414	0.488475	0.932807	0.255445
CASP6	5	-0.194962	-0.0896615	-0.151295	0.151858	0.463319	0.215414	0.370716	0.794324	0.505013
CASP7	6	-0.0935228	0.0108785	-0.0351612	0.222133	0.916786	0.488898	0.448339	0.982307	0.751159
CASP8	3	-0.0648003	0.0268782	0.117946	0.475167	0.565782	0.0859413	0.669648	0.845693	0.328573
CASP8AP2	1	0.197733	0.174392	0.248099	0.0234751	0.0893556	0.00663759	0.190171	0.513443	0.0959618
CAST	27	-0.157251	-0.116135	-0.0256907	0.0379279	0.185441	0.984851	0.217078	0.613688	0.99427
CASZ1	3	-0.0547666	-0.00249397	-0.067652	0.304201	0.970814	0.234286	0.525346	0.99589	0.525438
CAT	18	0.134027	-0.000499399	0.0482772	0.042693	0.572069	0.0998186	0.224262	0.849396	0.351939
CAV1	6	-0.0799969	-0.047581	0.050526	0.934172	0.718251	0.225693	0.967004	0.908572	0.515847
CAVIN1	1	1.06069	0.553369	0.0591254	0.0218386	0.130839	0.988648	0.187104	0.554311	0.995501
CBARP	1	-0.184038	-0.308664	-0.196103	0.0724123	0.0157732	0.185863	0.265447	0.374459	0.471488
CBFA2T3	3	-0.17587	-0.110419	-0.142568	0.00427562	0.0363891	0.00574491	0.135134	0.429449	0.0879309
CBFB	7	-0.0842692	-0.106723	-0.0826121	0.0758287	0.0452126	0.102192	0.271406	0.44401	0.35714
CBL	4	0.379402	0.192419	0.0493573	0.325596	0.677172	0.357316	0.545919	0.89171	0.645607
CBLB	4	-0.00936894	0.04352	-0.0432404	0.377949	0.785964	0.220618	0.58991	0.934643	0.509956
CBLL1	4	0.315703	0.132683	0.108468	0.0842363	0.432218	0.337899	0.282319	0.776464	0.628949
CBR1	12	-0.0585338	-0.0132934	0.00666846	0.252211	0.643148	0.711835	0.478009	0.877807	0.88353
CBR3	4	-0.0949477	-0.0770816	-0.103165	0.174524	0.468349	0.108619	0.395089	0.795784	0.366614
CBR4	4	-0.215291	-0.0365832	0.172585	0.334084	0.579481	0.119845	0.552658	0.852452	0.383523
CBS	7	0.195911	0.0921159	0.0670975	0.248404	0.670995	0.969652	0.475301	0.888234	0.990737
CBWD2	6	-0.0743577	-0.0208867	-0.0605714	0.0813496	0.264714	0.291809	0.278277	0.673898	0.584165
CBWD6	1	0.0795325	-0.0616328	-0.0212828	0.306677	0.863532	0.54641	0.527866	0.961893	0.788143
CBX1	8	-0.131363	-0.176361	0.00917622	0.253171	0.0812406	0.892594	0.478757	0.498305	0.96281
CBX3	12	0.0232808	-0.0620732	0.16671	0.82637	0.469703	0.00181159	0.904418	0.795784	0.052285
CBX4	3	0.063423	-0.0114059	-0.243997	0.71136	0.531001	0.0323134	0.833044	0.82884	0.201988
CBX5	13	-0.111148	-0.206788	-0.119579	0.564998	0.0487641	0.220766	0.737597	0.450157	0.509956
CBX7	1	0.13262	0.038444	0.0816896	0.222887	0.475303	0.613553	0.449272	0.800061	0.827738
CBX8	10	0.0548223	0.00500591	0.0760346	0.343992	0.657442	0.0723362	0.561946	0.882315	0.304704
CC2D1A	26	-0.102479	-0.114108	-0.0880316	0.0468232	0.07777	0.054595	0.229109	0.498219	0.263768
CC2D1B	8	0.0411221	-0.0320986	-0.0605638	0.707793	0.418252	0.147011	0.830808	0.772914	0.419198
CCAR1	20	0.00507307	0.0590567	0.102116	0.323982	0.109293	0.0143716	0.544872	0.536516	0.139233
CCAR2	31	-0.034826	-0.0731621	-0.0302657	0.929301	0.592219	0.699796	0.965121	0.8567	0.876796
CCDC102A	3	-0.0932427	-0.00948673	-0.0342369	0.097459	0.666388	0.264058	0.299401	0.886272	0.55931
CCDC115	6	0.142168	-0.108726	-0.108166	0.0658813	0.153517	0.0846774	0.254222	0.578991	0.325936
CCDC117	4	-0.109108	-0.0218589	0.0838583	0.30986	0.921413	0.254091	0.530971	0.983588	0.548467
CCDC12	6	-0.156754	-0.147526	-0.00731104	0.054092	0.429273	0.782861	0.238074	0.774928	0.920785
CCDC120	2	0.151633	0.134857	0.165272	0.0329847	0.0144414	0.00248991	0.212171	0.363299	0.0586765
CCDC124	14	0.00250219	-0.139679	-0.111806	0.570509	0.166861	0.401213	0.742067	0.595318	0.687514
CCDC126	1	0.0388759	-0.0306231	0.0225392	0.302342	0.681815	0.751301	0.523399	0.892983	0.905037
CCDC127	3	-0.068451	-0.00576045	0.0515665	0.290316	0.889938	0.784189	0.513352	0.970956	0.921326
CCDC134	3	-0.112709	-0.0653634	0.079523	0.285958	0.613431	0.820345	0.509801	0.865379	0.93511
CCDC137	4	-0.100526	0.0116548	-0.023861	0.472256	0.866486	0.590968	0.667132	0.963234	0.815876
CCDC149	3	0.0480815	0.185408	0.248641	0.822854	0.118659	0.0838648	0.90214	0.5442	0.324755
CCDC15	1	-0.230035	-0.101869	-0.231723	0.00742165	0.0838803	0.00424021	0.150726	0.503333	0.0748097
CCDC167	2	0.0883154	-0.0391191	0.0479406	0.624834	0.602095	0.936255	0.777835	0.859718	0.976697
CCDC174	6	0.0100837	0.0545415	0.0385814	0.712021	0.276863	0.174685	0.83335	0.679382	0.456778
CCDC186	6	0.0168257	0.0643775	0.174669	0.824126	0.322281	0.0418173	0.902603	0.711196	0.231664
CCDC22	19	-0.0118669	-0.0257817	0.0140919	0.878276	0.704479	0.646992	0.934806	0.905701	0.847479
CCDC25	6	-0.290632	-0.0905291	-0.0641968	0.00289681	0.148531	0.111538	0.120015	0.574569	0.3716
CCDC28A	2	0.137163	0.29794	0.29998	0.19082	0.0131683	0.000368378	0.414564	0.356507	0.0234852
CCDC32	1	-0.164874	0.154995	-0.0487358	0.0300655	0.15312	0.57913	0.206677	0.578991	0.808285
CCDC43	4	-0.364385	-0.317201	-0.158652	0.00874269	0.0109537	0.0687555	0.153964	0.346459	0.295334
CCDC47	22	-0.0576564	-0.120913	-0.092282	0.679141	0.133778	0.230686	0.812397	0.554972	0.521157
CCDC50	7	-0.0256421	-0.0337318	-0.0787459	0.751321	0.34371	0.229679	0.860919	0.724435	0.519643
CCDC51	11	0.14512	0.0164155	0.0180847	0.0850292	0.664791	0.935097	0.283021	0.886059	0.976524
CCDC59	4	-0.00169943	-0.0265361	0.0777369	0.669742	0.8856	0.202726	0.80679	0.969104	0.490335
CCDC6	15	-0.0594455	-0.020929	-0.0102344	0.475011	0.601657	0.57731	0.669648	0.859541	0.806782
CCDC61	1	0.0597973	0.267665	0.181376	0.781785	0.0641223	0.217391	0.878859	0.479266	0.505803
CCDC71L	1	-0.138706	-0.178323	-0.0767643	0.221652	0.198534	0.904299	0.447955	0.624921	0.966741
CCDC74A	1	-0.721541	0.492588	0.673543	0.457356	0.724214	0.226672	0.653875	0.912639	0.516387
CCDC85B	2	-0.296564	-0.273956	-0.430437	0.00142568	0.000385191	1.60468e-05	0.0989633	0.0956228	0.00537638
CCDC85C	6	-0.225692	-0.102513	-0.156623	0.00721787	0.153519	0.00848501	0.150726	0.578991	0.107507
CCDC86	11	-0.0876018	-0.160752	-0.0680308	0.288382	0.11284	0.397741	0.511498	0.537421	0.683772
CCDC88C	7	-0.122381	0.0644089	0.0588889	0.182711	0.157525	0.418064	0.405754	0.582905	0.700012
CCDC9	11	-0.0645803	-0.0523854	-0.0131444	0.246104	0.240761	0.675374	0.472723	0.657163	0.863279
CCDC90B	6	-0.00476533	-0.00289774	0.0318245	0.71862	0.784457	0.529437	0.8379	0.934583	0.777717
CCDC91	4	-0.283972	-0.126908	-0.0898133	0.0435335	0.322063	0.520091	0.225207	0.711196	0.771774
CCDC92	1	-0.370055	-0.156197	-0.330573	0.0609867	0.393033	0.111118	0.24761	0.755611	0.370681
CCDC93	12	-0.0850167	0.0600836	0.137245	0.413581	0.134472	0.00565299	0.620049	0.554972	0.0874737
CCDC97	6	-0.0398643	-0.0866805	-0.195701	0.354088	0.352245	0.162692	0.57221	0.73007	0.441912
CCHCR1	1	0.0240544	-0.0451309	-0.0699386	0.943734	0.979388	0.553334	0.972006	0.99704	0.79227
CCM2	5	0.0259105	0.0293176	0.0158889	0.423414	0.766527	0.951977	0.62783	0.929602	0.982899
CCNA2	4	-0.13633	-0.0234881	0.0903695	0.210799	0.793163	0.422762	0.435743	0.936292	0.702307
CCNB1	8	-0.398291	-0.106768	-0.104285	0.00461238	0.413501	0.160349	0.138317	0.770685	0.43942
CCNB2	2	0.1037	0.172121	0.256182	0.0640296	0.00531561	0.000442641	0.252773	0.302015	0.0258408
CCNC	1	0.0232686	0.166481	0.195044	0.920543	0.684756	0.354865	0.960403	0.894967	0.644173
CCND3	1	0.0783362	-0.040903	-0.193327	0.883253	0.717264	0.135469	0.937126	0.908572	0.403215
CCNE2	2	-0.284192	-0.108286	0.0159924	0.00265423	0.417149	0.697521	0.118382	0.772765	0.875994
CCNH	2	-0.129259	-0.106336	-0.213473	0.153488	0.326084	0.029453	0.371242	0.71265	0.194153
CCNK	7	0.00323857	-0.0221301	0.0223047	0.956237	0.576546	0.925133	0.978327	0.851076	0.974137
CCNL1	1	0.0944998	0.0829151	0.0857669	0.946605	0.574911	0.588295	0.973514	0.850569	0.81492
CCNL2	2	0.0211481	0.035825	0.0075136	0.677331	0.323205	0.701551	0.811113	0.71168	0.878119
CCNT1	12	0.0535353	-0.00203039	0.00622416	0.357786	0.716464	0.821815	0.575114	0.908572	0.93578
CCNT2	2	0.100062	0.328051	0.268887	0.407726	0.0136996	0.123075	0.616025	0.35786	0.388036
CCNY	3	0.15124	0.10466	0.054366	0.0487565	0.0812833	0.290165	0.232128	0.498305	0.583923
CCNYL1	3	0.1906	-0.0352765	0.217733	0.0150725	0.928534	0.0149412	0.172773	0.985984	0.141416
CCP110	3	-0.307264	-0.108233	-0.0412418	0.0491727	0.715198	0.724506	0.232128	0.908408	0.889992
CCPG1	4	-0.0808856	-0.0848046	-0.11559	0.118317	0.383993	0.0177788	0.326829	0.750076	0.154457
CCS	8	-0.107842	0.00218216	-0.00730297	0.0604106	0.969093	0.885498	0.246614	0.9953	0.960838
CCSMST1	1	-0.0128848	0.0840922	0.0265047	0.758356	0.8331	0.924136	0.865249	0.951344	0.973799
CCT2	38	-0.191753	-0.0964469	-0.133074	0.0203035	0.0942125	0.0206033	0.185643	0.521858	0.166077
CCT3	31	0.031253	-0.0299884	-0.0657752	0.912912	0.296334	0.114462	0.956738	0.691422	0.375817
CCT4	25	0.0157629	0.0269507	-0.0408359	0.966269	0.960635	0.319927	0.983974	0.993986	0.61312
CCT5	36	-0.208876	-0.120555	-0.0625126	0.0470517	0.180202	0.440339	0.229631	0.607717	0.716277
CCT6A	20	-0.126311	-0.135461	-0.0619908	0.0936618	0.0645279	0.359854	0.293381	0.479266	0.648511
CCT7	32	-0.104643	-0.0361113	-0.0299798	0.0860237	0.417165	0.482044	0.283599	0.772765	0.746024
CCT8	33	0.0495067	0.0282356	0.0427224	0.693114	0.380485	0.356002	0.821713	0.749144	0.644576
CCZ1B	5	-0.0348694	-0.0648844	-0.126682	0.567803	0.298373	0.00797398	0.740228	0.693059	0.103339
CD151	3	-0.0130384	0.159203	0.0293521	0.957079	0.24501	0.811962	0.978669	0.661221	0.932015
CD276	9	-0.0399365	-0.0919119	0.00943952	0.835341	0.518681	0.859766	0.909313	0.821329	0.95069
CD2AP	17	-0.0521253	-0.0674501	-0.0313128	0.174265	0.155195	0.307465	0.394735	0.579706	0.600809
CD2BP2	8	-0.031142	-0.0839007	0.00880391	0.559206	0.148132	0.756043	0.734674	0.574485	0.908336
CD302	1	-0.0171592	0.301402	-0.148418	0.752466	0.274398	0.461682	0.861718	0.679285	0.732192
CD320	1	-0.0551267	-0.0706302	0.0474855	0.595173	0.315721	0.776396	0.758585	0.707047	0.918328
CD44	6	-0.114607	-0.0530041	0.0227984	0.4943	0.922002	0.44133	0.6849	0.983588	0.716731
CD46	1	0.228648	-0.0674013	-0.166834	0.245091	0.209588	0.0598466	0.471816	0.634114	0.275495
CD47	6	0.00347788	0.0905895	0.1518	0.615898	0.17725	0.0377768	0.772091	0.605287	0.220703
CD55	9	-0.0210818	0.0534563	-0.00849596	0.662488	0.839995	0.388744	0.802163	0.954438	0.675459
CD58	1	-0.0195089	-0.212307	0.146717	0.727661	0.40533	0.113163	0.844471	0.764058	0.374263
CD59	2	0.139955	0.0730144	0.000794593	0.213683	0.766961	0.757207	0.438869	0.929602	0.908901
CD63	2	0.213256	0.172036	0.209121	0.00278648	0.043729	0.0170844	0.118382	0.443639	0.151033
CD81	3	0.325514	0.129816	0.220053	0.0409994	0.72728	0.181073	0.222651	0.913516	0.465738
CD9	8	0.0581643	-0.105562	-0.00287231	0.441416	0.645941	0.551405	0.641852	0.87834	0.791123
CD99	2	0.285428	-0.508001	-0.516971	0.145148	0.123237	0.00207029	0.361392	0.549773	0.0541005
CDC123	7	-0.325413	-0.21681	-0.34574	6.81119e-05	0.00589314	0.000109119	0.0287331	0.306842	0.0132491
CDC16	8	0.0242527	0.0707502	-0.00250058	0.554939	0.247284	0.700603	0.732506	0.661221	0.877291
CDC20	2	-0.376959	-0.377049	-0.546023	9.82955e-05	0.000521638	4.50118e-06	0.0291333	0.106765	0.00289051
CDC23	6	-0.0258824	0.179486	0.126766	0.99448	0.0116116	0.0113596	0.997457	0.350127	0.122773
CDC25B	2	-0.35542	-0.0867512	-0.149573	8.44778e-05	0.201207	0.00185848	0.0287331	0.628276	0.0532522
CDC25C	3	0.0189222	0.142466	0.151258	0.86861	0.0656959	0.00195209	0.930558	0.479266	0.0538837
CDC26	5	-0.262289	-0.00845614	0.0363921	0.0526092	0.651376	0.711627	0.236665	0.879655	0.88353
CDC27	9	-0.158935	-0.00450017	-0.00775582	0.123012	0.869652	0.732165	0.331057	0.963329	0.895424
CDC34	1	0.135046	-0.0445256	-0.17371	0.235158	0.895032	0.199344	0.461924	0.972512	0.48681
CDC37	17	-0.142832	-0.068148	-0.024861	0.120236	0.195743	0.80092	0.328326	0.621781	0.929335
CDC37L1	4	-0.0332851	-0.150452	-0.0584339	0.550868	0.284955	0.455533	0.729505	0.682892	0.729194
CDC40	11	-0.137135	0.00817948	0.0215782	0.191257	0.991024	0.690943	0.41528	0.998838	0.872985
CDC42	9	-0.106144	-0.122379	-0.0896666	0.103379	0.0437716	0.105594	0.30794	0.443639	0.361526
CDC42BPA	4	-0.165014	-0.0878315	-0.130859	0.0165629	0.192582	0.0111641	0.172773	0.618607	0.122202
CDC42BPB	23	-0.0385039	-0.0182583	0.00685974	0.283828	0.4984	0.952862	0.50841	0.810952	0.983269
CDC42BPG	9	-0.00393823	0.0278369	-0.0322605	0.942122	0.531263	0.650813	0.971107	0.828942	0.850053
CDC42EP1	1	0.225831	0.31218	0.196611	0.23126	0.00897226	0.0254216	0.457297	0.344213	0.183426
CDC42EP4	8	0.0491842	0.146325	0.215852	0.208881	0.0430755	0.00949422	0.432932	0.441997	0.113255
CDC42SE1	1	-0.367288	-0.467195	-0.35721	0.0801252	0.0221871	0.0319327	0.276633	0.398582	0.201369
CDC45	1	0.128126	-0.186244	0.306694	0.205514	0.276171	0.0501196	0.429068	0.679382	0.255269
CDC5L	26	0.0351643	-0.007113	-0.0100194	0.395433	0.690272	0.979339	0.605035	0.897502	0.99346
CDC73	17	-0.137166	-0.0303858	0.0406865	0.178984	0.761009	0.806589	0.401062	0.927167	0.930057
CDCA2	6	-0.098926	-0.117409	-0.283113	0.888994	0.13503	0.0291322	0.940393	0.554972	0.193964
CDCA3	5	-0.158575	-0.0775858	0.0445963	0.186048	0.425257	0.763111	0.409229	0.774928	0.912702
CDCA5	3	-0.106262	-0.234478	-0.0824161	0.070436	0.00195423	0.245556	0.261756	0.212102	0.539104
CDCA7L	2	-0.00591569	0.299374	0.00462236	0.877999	0.306721	0.941202	0.934806	0.701104	0.979321
CDCA8	7	0.249216	0.076455	-0.120784	0.0197316	0.415671	0.402928	0.182754	0.772701	0.68892
CDH1	23	-0.133597	-0.100963	-0.177121	0.153963	0.100731	0.0111495	0.371576	0.528292	0.122202
CDH18	1	-0.0177436	0.0292116	0.0500546	0.530148	0.799431	0.899793	0.712722	0.938566	0.96438
CDH3	8	-0.0508282	-0.111415	-0.162658	0.748693	0.0265456	0.00256111	0.859091	0.409123	0.0598058
CDIPT	3	0.156547	0.0901265	0.0709236	0.0880168	0.330569	0.590303	0.286793	0.712981	0.815616
CDK1	10	-0.0875867	-0.0280106	0.165993	0.0324041	0.776077	0.121479	0.211761	0.932191	0.386028
CDK11B	26	0.111676	0.0356818	0.0278469	0.0537097	0.303812	0.355002	0.237553	0.698024	0.644173
CDK12	5	0.0570742	0.0425805	0.0230712	0.461136	0.23428	0.760135	0.656721	0.65262	0.910413
CDK13	7	-0.0537041	0.0278977	-0.0509954	0.913703	0.331734	0.456512	0.957032	0.71311	0.729765
CDK16	2	0.0336245	0.0885397	-0.0403902	0.991593	0.132422	0.306658	0.996343	0.554505	0.600254
CDK19	3	0.390784	0.140128	0.010288	0.0632054	0.49966	0.978879	0.25173	0.810983	0.99346
CDK2	8	-0.11189	0.0292055	0.0216248	0.115754	0.544196	0.690837	0.324064	0.835466	0.872985
CDK2AP1	3	0.128854	-0.0518556	-0.0071068	0.0742161	0.229933	0.412971	0.268567	0.649845	0.696559
CDK4	10	-0.186995	-0.113227	-0.130826	0.0104065	0.214438	0.0378225	0.156211	0.639321	0.220712
CDK5	5	-0.0359039	0.108552	0.175183	0.370853	0.0682071	0.0388005	0.585687	0.482819	0.222799
CDK5RAP1	4	-0.0223776	0.0625121	-0.0369997	0.915261	0.274642	0.493462	0.957898	0.679285	0.754488
CDK5RAP2	18	-0.243441	-0.172973	-0.257672	0.000527711	0.00190268	6.86906e-05	0.0658037	0.212102	0.0108026
CDK5RAP3	13	0.119273	0.012027	0.0775926	0.0559866	0.968659	0.129805	0.240581	0.9953	0.395913
CDK6	3	0.0140535	0.122674	0.0896245	0.774506	0.0837067	0.392422	0.874986	0.503333	0.679448
CDK7	3	-0.107924	0.119901	-0.195792	0.560554	0.715143	0.302571	0.735141	0.908408	0.595712
CDK9	7	-0.0540998	0.0802096	0.0878609	0.300532	0.655392	0.292006	0.522187	0.881405	0.584165
CDKAL1	9	0.361505	0.185927	0.0197325	0.0406447	0.412119	0.665096	0.222651	0.770073	0.858498
CDKL5	1	-0.16677	-0.294704	-0.245703	0.568299	0.194255	0.322449	0.740493	0.619691	0.615984
CDKN1A	2	-0.124869	-0.30021	-0.492853	0.224797	0.0152233	0.000875181	0.450763	0.370065	0.0364549
CDKN1B	2	-0.302062	-0.185635	-0.110214	0.142024	0.667245	0.910789	0.35661	0.886668	0.969813
CDKN2AIP	3	0.0799198	0.0762109	0.127528	0.261647	0.157349	0.132691	0.48737	0.582905	0.398921
CDKN2AIPNL	3	-0.0192638	0.136836	0.083008	0.872772	0.156625	0.245071	0.932684	0.582085	0.538654
CDKN2B	2	-0.188268	-0.172225	-0.222312	0.165549	0.0434576	0.00200586	0.384221	0.443639	0.0541005
CDKN2C	1	-0.0609027	0.13152	0.296436	0.793636	0.313643	0.0807463	0.885482	0.706342	0.31926
CDKN3	1	-0.631214	-0.052261	-0.455526	0.00192146	0.809019	0.0100263	0.107254	0.94201	0.114974
CDNF	1	0.0930718	0.0776722	-0.0541351	0.21229	0.238641	0.67496	0.43719	0.656343	0.863279
CDR2L	1	0.1073	-0.332473	-0.138327	0.88801	0.0237873	0.0571709	0.939961	0.402811	0.27006
CDS1	2	0.239415	0.290075	0.274758	0.174191	0.126142	0.114833	0.394682	0.552158	0.376166
CDS2	1	0.353421	0.384038	0.55159	0.120507	0.030546	0.0527633	0.328547	0.426427	0.260178
CDT1	3	0.158145	-0.0980887	-0.45294	0.637348	0.282111	0.00942215	0.785297	0.682055	0.112744
CDV3	5	-0.262081	-0.102547	-0.11419	0.0619683	0.372236	0.51279	0.249362	0.744607	0.766983
CDYL	6	-0.155035	-0.161593	-0.189886	0.184287	0.152705	0.106536	0.407261	0.578991	0.36294
CDYL2	1	-0.553742	-0.628452	-0.779592	0.0381463	0.0102319	0.00722032	0.217078	0.344213	0.0998918
CEACAM5	2	-0.0680427	-0.0507579	-0.0625313	0.581733	0.96921	0.468671	0.75014	0.9953	0.737022
CEACAM6	2	0.130939	0.0284808	0.104195	0.559836	0.97646	0.694131	0.734815	0.99704	0.87473
CEBPB	3	0.42201	-0.0768804	-0.329409	0.378438	0.429927	0.053271	0.590094	0.774928	0.261303
CEBPG	2	0.0500957	-0.0982713	-0.264143	0.520938	0.899446	0.103803	0.705831	0.974568	0.359537
CEBPZ	14	0.0685603	0.0362649	0.0364228	0.213103	0.694961	0.810549	0.43803	0.900668	0.931418
CELF1	13	-0.0270565	-0.0472663	-0.0705984	0.670847	0.205854	0.0771492	0.807237	0.632092	0.312407
CELSR1	6	0.053047	-0.0741407	-0.0903505	0.402236	0.356793	0.288292	0.611488	0.734164	0.583025
CELSR2	29	0.403584	0.177986	0.0253133	0.0482032	0.563254	0.874804	0.231934	0.845442	0.955923
CEMIP2	7	0.452313	0.203144	0.100666	0.0472548	0.425452	0.864937	0.23018	0.774928	0.952172
CENATAC	1	0.114328	0.0814107	-0.0348094	0.0644323	0.146548	0.835893	0.25338	0.57093	0.939663
CENPB	11	0.322874	0.201565	0.146261	0.0216329	0.176666	0.35014	0.187096	0.605287	0.640442
CENPBD1P	1	0	0	0	0.272821	0.274602	0.273634	0.497566	0.679285	0.5694
CENPC	5	0.297521	0.272768	0.0862093	0.000731749	0.000167837	0.0441172	0.0754401	0.0687294	0.238239
CENPE	10	-0.513283	-0.347785	-0.455732	6.74576e-05	0.000218123	1.54047e-05	0.0287331	0.0687294	0.00537638
CENPF	22	-0.0582651	-0.116635	-0.16601	0.254915	0.0359815	0.00940551	0.480532	0.429449	0.11272
CENPH	3	0.00890969	0.143626	-0.0268812	0.794058	0.0671426	0.763455	0.88553	0.479519	0.912829
CENPI	2	-0.252814	-0.206146	-0.191898	0.00349979	0.0465364	0.00761318	0.131558	0.444443	0.101129
CENPJ	1	-0.153641	-0.235909	-0.426663	0.254119	0.210023	0.0388327	0.480196	0.634594	0.222818
CENPK	1	0.0559987	0.105176	0.0165138	0.385134	0.435137	0.971131	0.596072	0.777636	0.990891
CENPL	1	0.231497	0.412833	0.286787	0.0234938	0.00332251	0.00209508	0.190171	0.246185	0.0541005
CENPN	1	0.05099	0.100255	-0.0171543	0.315859	0.650767	0.402137	0.537138	0.879564	0.688026
CENPP	3	0.363472	0.162137	-0.0417928	0.024346	0.479284	0.233964	0.193413	0.801939	0.524869
CENPQ	4	0.898883	0.433861	0.243471	0.0123734	0.198522	0.382376	0.162097	0.624921	0.670042
CENPT	5	0.306232	0.0923813	-0.0873585	0.061623	0.754177	0.265515	0.248882	0.92484	0.56073
CENPU	2	0.256648	0.0188378	-0.0172898	0.0184935	0.630354	0.540331	0.178889	0.872711	0.785029
CENPV	2	0.411254	0.42228	-0.035849	0.0580344	0.0571491	0.302735	0.244049	0.467506	0.595881
CENPX	3	-0.201428	-0.0601056	-0.24444	0.0634856	0.410471	0.0120987	0.252137	0.769355	0.127476
CEP112	1	0.122668	-0.215345	-0.127069	0.119892	0.491605	0.479194	0.328085	0.80843	0.744039
CEP128	3	-0.04643	-0.0239782	0.0265367	0.302253	0.681766	0.912008	0.523399	0.892983	0.970252
CEP131	29	-0.0100306	-0.00371579	-0.0532021	0.569986	0.426537	0.0834135	0.741945	0.774928	0.323658
CEP135	4	0.024855	-0.0305558	-0.20556	0.978768	0.565181	0.0259551	0.989166	0.845687	0.184207
CEP162	1	-0.0644888	0.142775	0.430135	0.432318	0.046656	7.84435e-05	0.635165	0.444443	0.0117056
CEP170	4	0.107355	-0.00650955	-0.110107	0.331094	0.449355	0.0645761	0.549998	0.784132	0.286557
CEP170B	18	0.0157401	-0.110894	-0.127114	0.558006	0.0263249	0.0149112	0.734534	0.409123	0.141335
CEP20	1	-0.0168951	-0.113042	-0.283099	0.39903	0.224265	0.0084962	0.608294	0.647775	0.107507
CEP250	7	0.0356337	-0.105459	-0.147398	0.64496	0.221752	0.0582768	0.790149	0.645537	0.272121
CEP290	3	-0.371338	-0.0574278	-0.101836	0.00405611	0.323883	0.568022	0.135134	0.71168	0.802237
CEP350	6	-0.0371757	0.00574853	-0.0546592	0.952339	0.989804	0.248725	0.976831	0.998838	0.541491
CEP41	4	-0.286616	-0.141902	-0.192879	0.0103813	0.0618492	0.0167911	0.156211	0.476736	0.149759
CEP43	6	-0.260042	-0.197927	-0.187551	0.0280151	0.0801048	0.111594	0.203755	0.498219	0.371625
CEP55	10	-0.295851	-0.224323	-0.206736	0.00311413	0.0064598	0.00236541	0.126302	0.312547	0.0575546
CEP57	1	-0.226389	-0.0276153	0.0216925	0.0423551	0.55168	0.997616	0.223601	0.838281	0.999366
CEP63	5	-0.124094	-0.0915192	-0.0738544	0.0484212	0.102915	0.163075	0.231934	0.528292	0.442361
CEP68	1	0.801783	0.191196	-0.112704	0.0120235	0.930113	0.382835	0.162097	0.986077	0.670331
CEP72	2	-0.242996	-0.134682	-0.170736	0.0384559	0.136518	0.0649238	0.217738	0.55577	0.286846
CEP76	1	-0.332824	-0.196244	0.00912314	0.00953057	0.166331	0.987032	0.155137	0.595318	0.994929
CEP85	9	-0.342023	-0.236413	-0.330903	3.13829e-05	0.000580524	4.8363e-05	0.0172741	0.114706	0.00890549
CEP89	1	-0.00887834	-0.14072	-0.295957	0.968825	0.116819	0.0470764	0.984852	0.54229	0.246113
CEP95	1	-0.124079	-0.192133	-0.173767	0.185763	0.254122	0.043138	0.409114	0.666773	0.235259
CEP97	4	-0.036148	0.0858575	0.103476	0.621345	0.0764774	0.0399569	0.776278	0.498219	0.225991
CEPT1	2	0.101597	0.0161534	-0.207098	0.59288	0.771896	0.112049	0.757934	0.930953	0.372588
CERCAM	1	0.00619348	-0.0118104	-0.203441	0.820206	0.841528	0.434202	0.901513	0.954697	0.710605
CERS2	4	0.280438	0.0902531	-0.0538886	0.118967	0.523898	0.170869	0.327116	0.825764	0.451239
CERS4	3	2.15079	0.602395	-0.109758	0.0937708	0.964028	0.289876	0.293381	0.994943	0.583923
CERS5	2	0.288709	0.108081	0.0214495	0.0181551	0.157508	0.908141	0.177333	0.582905	0.96867
CERS6	3	-0.0675329	-0.0528047	-0.123382	0.154167	0.155295	0.0109632	0.371829	0.579799	0.121035
CERT1	15	-0.0474195	-0.00945928	-0.00327418	0.262737	0.547108	0.805213	0.488475	0.836762	0.929668
CES2	1	0.299736	0.00688222	0.0259332	0.0731479	0.55299	0.651487	0.266263	0.839003	0.850053
CETN2	12	-0.174126	-0.0464976	-0.0779657	0.0539785	0.557505	0.188542	0.237962	0.842544	0.473414
CETN3	4	-0.1605	-0.0790118	-0.0984205	0.0521748	0.226604	0.148752	0.236432	0.647943	0.42168
CFAP20	2	-0.151309	-0.0628055	-0.0602253	0.345568	0.930137	0.968448	0.563229	0.986077	0.990163
CFAP298	3	-0.21903	-0.168591	-0.200447	0.0116882	0.00265811	0.0062819	0.161847	0.23454	0.0932722
CFAP36	3	0.0654523	0.0550076	0.20288	0.446281	0.327694	0.0362444	0.644982	0.712981	0.216438
CFAP418	1	0.590918	0	0	0.295455	0.875324	0.963163	0.517615	0.96471	0.988037
CFAP45	1	0.00172363	-0.133362	-0.0693251	0.543903	0.627042	0.416555	0.723979	0.872289	0.699798
CFAP57	1	-0.365437	-1.18581e-05	-0.0527713	0.0517202	0.939767	0.997393	0.236432	0.988072	0.999366
CFDP1	6	-0.154688	0.00591975	0.18292	0.144163	0.982051	0.223731	0.360103	0.997281	0.513841
CFL1	13	-0.375484	-0.163486	-0.216972	0.0492207	0.118226	0.0881105	0.232128	0.5442	0.331751
CFL2	11	0.0657691	0.0155448	0.171529	0.970704	0.455891	0.00107092	0.98593	0.788028	0.0400606
CGAS	3	0.063272	0.0390539	-0.0919259	0.574538	0.960707	0.0992741	0.744599	0.993986	0.351565
CGGBP1	7	0.0587413	0.0684817	0.160125	0.360133	0.357575	0.0129754	0.577562	0.734597	0.132419
CGN	49	0.0203787	-0.0474484	-0.0667454	0.664354	0.204055	0.0612125	0.803528	0.630969	0.277532
CGREF1	2	0.236471	0.213205	0.352808	0.324062	0.273198	0.084543	0.544889	0.67885	0.325852
CHAF1A	7	0.0884228	-0.2286	-0.161179	0.556659	0.100095	0.0258398	0.73365	0.527593	0.184207
CHAMP1	16	0.0907436	0.0311816	0.086779	0.164256	0.879453	0.132226	0.383562	0.967047	0.398177
CHCHD1	3	-0.169876	-0.301538	-0.34255	0.594047	0.557089	0.130014	0.758297	0.842411	0.395913
CHCHD2	2	0.00609802	0.393283	0.317985	0.79451	0.136186	0.280231	0.885906	0.555199	0.574552
CHCHD3	16	-0.237727	-0.16166	-0.293632	0.189475	0.103753	0.0184819	0.413147	0.528292	0.156958
CHCHD4	3	0.0877873	-0.062358	0.0481977	0.112042	0.512339	0.326452	0.317881	0.81724	0.618733
CHCHD5	5	0.120038	-0.0322688	-0.160536	0.649427	0.235553	0.0947131	0.79235	0.652704	0.344947
CHCHD6	6	0.0784611	0.0315569	0.0145383	0.084756	0.67782	0.4687	0.283021	0.892411	0.737022
CHD1	21	0.0604928	-0.0313307	-0.0930795	0.342501	0.433729	0.0553649	0.560006	0.777376	0.265655
CHD1L	7	0.683833	0.316878	0.0537429	0.0517794	0.388826	0.924839	0.236432	0.752782	0.974137
CHD2	9	0.196736	0.153395	0.0704062	0.0893128	0.0592267	0.381919	0.288139	0.471999	0.669771
CHD3	21	0.1852	0.0348021	-0.00239662	0.132315	0.549546	0.793931	0.343306	0.837083	0.926354
CHD4	45	0.00267916	-0.0330265	-0.0581911	0.793025	0.403922	0.248535	0.885482	0.762803	0.541491
CHD6	23	-0.0239405	0.0095395	0.0815146	0.904434	0.667005	0.154146	0.951477	0.886634	0.430535
CHD7	5	0.133253	-0.0227052	-0.160394	0.469076	0.465505	0.0517547	0.663754	0.795203	0.258975
CHD8	23	0.5023	0.267042	-0.00149051	0.033432	0.183987	0.904806	0.212761	0.61323	0.966916
CHD9	1	-0.113935	-0.197821	-0.136483	0.290479	0.20883	0.355421	0.513402	0.633321	0.644368
CHDH	3	0.106233	0.132213	0.181142	0.0807313	0.093898	0.0403377	0.277359	0.521858	0.227224
CHEK1	1	-0.0537994	0.110378	0.14228	0.340555	0.503943	0.528527	0.558721	0.813083	0.77727
CHEK2	3	-0.230038	0.0417106	-0.121266	0.0997525	0.271993	0.097138	0.302993	0.678226	0.348647
CHERP	22	-0.0570413	-0.0762667	-0.013159	0.813437	0.302771	0.838124	0.897401	0.697089	0.94121
CHFR	4	0.0349705	0.0418082	-0.0341766	0.98066	0.939216	0.337334	0.990401	0.988072	0.628112
CHID1	8	-0.0256202	-0.0399671	-0.00695871	0.96129	0.435996	0.598811	0.981417	0.778269	0.819907
CHKA	2	-0.210399	-0.344635	-0.451402	0.0103242	0.0318786	3.37958e-05	0.156211	0.428285	0.00764195
CHKB	3	0.338294	0.134354	0.023525	0.0254839	0.0315737	0.231965	0.197339	0.428071	0.522661
CHML	4	0.189061	-0.018998	0.165759	0.309824	0.349813	0.19019	0.530971	0.728187	0.475691
CHMP1A	7	-0.0500906	0.0416952	-0.0399225	0.22767	0.446649	0.278157	0.453574	0.782779	0.573284
CHMP1B	4	0.0114435	0.113785	0.100488	0.396981	0.0700972	0.0220159	0.60649	0.485327	0.169979
CHMP2A	7	0.00158524	-0.00884828	-0.0627915	0.706508	0.746032	0.108848	0.830599	0.91968	0.366761
CHMP2B	9	-0.164779	0.0232601	0.0808888	0.0589549	0.706889	0.128066	0.244883	0.906824	0.393769
CHMP3	5	0.0583009	0.231487	0.200058	0.334134	0.0120192	0.00165933	0.552658	0.350555	0.0505405
CHMP4A	7	-0.0780097	0.0200546	-0.0267464	0.166104	0.823341	0.743354	0.384824	0.946965	0.901808
CHMP4B	7	-0.098358	-0.0426536	-0.079293	0.335	0.454626	0.236424	0.553497	0.787849	0.527404
CHMP4C	1	-0.098254	-0.149243	-0.0942883	0.667695	0.154156	0.172392	0.804953	0.578991	0.453396
CHMP5	5	-0.264645	0.0654805	0.133453	0.188762	0.516831	0.258864	0.412536	0.820469	0.554112
CHMP6	4	0.146891	0.137493	0.120438	0.0680398	0.0126878	0.030057	0.258149	0.354973	0.195392
CHMP7	7	-0.0974434	0.0134837	0.165239	0.153124	0.836159	0.123351	0.371132	0.952749	0.388036
CHORDC1	6	-0.413098	-0.216789	-0.189739	0.115696	0.294556	0.493881	0.324064	0.690552	0.754541
CHP1	11	0.0753156	-0.0940204	-0.0970554	0.148245	0.0991849	0.0387831	0.365326	0.52725	0.222799
CHPF	1	0.332278	0.0932994	0.0957191	0.172117	0.619907	0.781366	0.392407	0.868471	0.92013
CHPF2	2	0.267924	0.162631	0.0165807	0.0313397	0.710441	0.760552	0.210003	0.907301	0.91063
CHPT1	2	0.409908	0.318561	0.108793	0.0356247	0.173725	0.741352	0.214947	0.600936	0.900843
CHRAC1	2	0.0655558	-0.111	-0.155169	0.666398	0.22737	0.0767364	0.804144	0.647972	0.311555
CHST10	1	0.0541078	-0.201262	-0.099652	0.666805	0.259477	0.346516	0.804257	0.66986	0.63714
CHST12	2	0.246949	-0.0426589	0.229153	0.689054	0.77578	0.371995	0.818916	0.932191	0.661878
CHST14	4	0.164872	0.189465	0.0769803	0.0127066	0.0377718	0.0995158	0.163741	0.429449	0.351893
CHSY1	3	0.152342	0.0863034	-0.00300324	0.197013	0.196561	0.823666	0.421093	0.622654	0.93578
CHTF18	8	0.0724455	0.174971	0.187186	0.234539	0.0191389	0.0221553	0.461179	0.390525	0.170388
CHTF8	1	-0.0837308	0.103131	-0.0592895	0.472367	0.373491	0.663765	0.667167	0.744952	0.858217
CHTOP	4	0.180193	0.202785	0.297783	0.0446889	0.0200665	0.0026949	0.225724	0.392825	0.0617224
CHUK	4	0.0574029	0.124887	0.0263859	0.972715	0.848639	0.797103	0.986647	0.95705	0.926759
CIAO1	7	0.0479684	0.0270281	-0.0206349	0.752838	0.846152	0.89249	0.861982	0.956078	0.96281
CIAO2A	1	0.215075	-0.0841814	-0.00368107	0.0527326	0.33353	0.860136	0.236862	0.715132	0.95069
CIAO2B	2	0.458874	0.242431	0.100832	0.0676253	0.413312	0.77192	0.257217	0.770685	0.915756
CIAO3	4	-0.0616438	-0.00877223	-0.124371	0.491579	0.593442	0.203141	0.683281	0.857021	0.490784
CIAPIN1	11	0.000237722	0.064945	-0.0010051	0.609232	0.641687	0.331133	0.768782	0.877522	0.622369
CIB1	6	-0.0337076	-0.041468	-0.154413	0.577123	0.667039	0.0181375	0.746319	0.886634	0.155817
CIC	6	0.107465	0.0444165	0.0362836	0.0626986	0.685813	0.255166	0.250596	0.895079	0.550017
CIP2A	11	-0.134389	-0.099049	-0.106026	0.0173513	0.0850785	0.0207638	0.174555	0.505486	0.166509
CIR1	4	0.00313156	0.0472013	0.0436725	0.790475	0.818198	0.646395	0.884093	0.945208	0.847466
CIRBP	10	0.0682831	-0.0198775	0.0768124	0.869473	0.245868	0.190756	0.931354	0.661221	0.476333
CISD1	1	-0.281041	-0.247703	-0.243517	0.0122079	0.0328023	0.0147789	0.162097	0.428432	0.140709
CISD2	6	0.178861	-0.00277742	0.0291224	0.314605	0.417169	0.698085	0.536165	0.772765	0.876242
CISD3	1	-0.132994	0.331393	0.287327	0.773187	0.0491745	0.00574385	0.874388	0.450791	0.0879309
CIT	34	-0.0567216	0.0197355	-0.024447	0.362454	0.478934	0.659179	0.578745	0.801796	0.855013
CIZ1	9	-0.123602	-0.0930881	-0.261605	0.0565033	0.154499	0.00554638	0.241361	0.578991	0.0868707
CKAP2	10	-0.0804101	-0.117754	-0.097385	0.126268	0.0324257	0.0961371	0.335751	0.428432	0.346911
CKAP2L	2	-0.0660438	-0.126159	-0.0857745	0.773793	0.346026	0.967783	0.874574	0.72538	0.989958
CKAP4	36	0.0961986	-0.0355291	-0.00725295	0.0434029	0.933065	0.483634	0.225207	0.98646	0.74717
CKAP5	53	-0.279499	-0.126343	-0.0517116	0.0158344	0.242013	0.545993	0.172773	0.658674	0.788124
CKB	7	-0.0752293	-0.00190924	-0.050368	0.27554	0.512573	0.279722	0.499981	0.817444	0.574228
CKMT1A	13	-0.0120269	-0.0465328	-0.0557485	0.70444	0.689178	0.474392	0.829188	0.897414	0.740463
CKS1B	1	-0.166636	-0.149682	-0.110931	0.238158	0.314904	0.718712	0.464737	0.706342	0.886707
CKS2	2	-0.0827183	-0.000912378	0.092845	0.117719	0.551607	0.128876	0.326427	0.838281	0.394877
CLASP1	17	-0.0508122	-0.00740096	-0.077277	0.15325	0.827647	0.300187	0.371132	0.94965	0.593291
CLASP2	6	0.153849	-0.0987702	-0.188509	0.290148	0.153294	0.00401396	0.513288	0.578991	0.0730558
CLASRP	4	-0.0272548	-0.0955161	-0.0987972	0.459649	0.1071	0.0498214	0.655693	0.532122	0.254366
CLCC1	14	0.165253	0.0834456	0.0854361	0.0222233	0.311411	0.186478	0.187206	0.704607	0.47184
CLCN3	4	-0.0188655	-0.0992115	-0.100625	0.977941	0.991671	0.329571	0.988998	0.998838	0.620793
CLCN5	1	-0.76458	-0.466769	0.377871	0.336791	0.705101	0.12356	0.555359	0.905701	0.388036
CLCN7	6	0.0994433	0.012964	-0.0142524	0.0887296	0.566705	0.892121	0.288012	0.845693	0.96281
CLDN3	4	-0.0512539	0.0101904	0.033594	0.878028	0.665835	0.703174	0.934806	0.886267	0.879082
CLDN4	2	-0.298676	-0.236485	-0.0375545	0.115807	0.239203	0.673245	0.324064	0.656343	0.862515
CLDND1	2	0.0784576	0.0371995	0.198949	0.28681	0.312057	0.00200528	0.510193	0.705402	0.0541005
CLEC16A	5	0.0148728	0.00836817	0.149851	0.999952	0.90944	0.120533	1	0.979171	0.384054
CLEC3B	1	0.33873	0.0859851	-0.097208	0.332234	0.783719	0.975714	0.551137	0.934583	0.993076
CLIC1	14	-0.141659	-0.114139	-0.0774319	0.0806453	0.0754718	0.14588	0.277359	0.495388	0.417434
CLIC3	13	-0.210329	-0.211898	-0.274174	0.00803169	0.00476358	0.000962414	0.153198	0.291335	0.0372682
CLIC4	8	-0.116106	-0.0945143	0.0497476	0.0279879	0.154691	0.155734	0.203755	0.578991	0.432618
CLINT1	19	0.116058	0.0676214	0.0660528	0.038597	0.227327	0.165621	0.218056	0.647972	0.444813
CLIP1	40	-0.222175	-0.103998	-0.113004	0.00176888	0.0314844	0.00826338	0.105471	0.428071	0.105822
CLK1	4	0.319632	0.155209	0.116484	0.0220617	0.189881	0.744826	0.187206	0.615697	0.902032
CLK2	2	0.213721	0.105479	-0.0224029	0.189037	0.477726	0.365726	0.412669	0.800991	0.654198
CLK3	5	-0.2755	-0.0745542	-0.0892528	0.0121942	0.300233	0.119381	0.162097	0.694546	0.382804
CLMN	13	-0.160409	-0.191286	-0.0893124	0.103568	0.163455	0.372163	0.308077	0.59219	0.662024
CLN3	3	-0.0636814	-0.0191808	0.10882	0.525607	0.869735	0.308266	0.709587	0.963329	0.601543
CLN5	2	0.0252796	0.0548036	0.0476366	0.645076	0.259887	0.173096	0.790149	0.670021	0.454473
CLN6	2	0.957222	0.356213	0.0234189	0.0931031	0.47474	0.589698	0.29259	0.799606	0.815521
CLN8	1	-0.050171	-0.0730399	-0.0441622	0.782213	0.86746	0.970881	0.878859	0.963329	0.990891
CLNS1A	6	0.0173977	-0.0743601	-0.0595472	0.847191	0.193648	0.126926	0.916403	0.619691	0.392493
CLOCK	1	-0.290816	-0.143083	-0.241022	0.00533591	0.153746	0.00567601	0.143119	0.578991	0.0874883
CLP1	3	0.139007	0.0872158	0.0558844	0.270751	0.134763	0.399471	0.495584	0.554972	0.685394
CLPB	14	-0.0158005	0.104318	0.0807101	0.747603	0.0911449	0.0389226	0.858404	0.517204	0.223002
CLPP	5	0.28499	0.0587844	0.127755	0.0207765	0.314948	0.0838471	0.186202	0.706342	0.324755
CLPTM1	14	-0.0258725	-0.0768287	0.0232566	0.811418	0.204716	0.66597	0.89675	0.63137	0.85905
CLPTM1L	4	0.0431072	0.0337183	-0.0149991	0.44493	0.995252	0.948906	0.644359	0.999402	0.981512
CLPX	24	0.09326	0.0400478	0.0500078	0.0706424	0.287977	0.117197	0.261842	0.68429	0.379357
CLSPN	2	-0.126376	-0.0687257	-0.203131	0.0487537	0.846631	0.00131164	0.232128	0.956331	0.0445263
CLSTN1	1	-0.0605229	0.0587693	0.0604295	0.676349	0.595018	0.371595	0.810699	0.857832	0.661625
CLTA	9	-0.197757	-0.22761	-0.157299	0.203898	0.0902647	0.133122	0.42778	0.516188	0.399218
CLTB	10	-0.124374	-0.193694	-0.170693	0.157303	0.0231943	0.0146217	0.374571	0.402811	0.140492
CLTC	78	-0.0289771	-0.0185919	0.0638679	0.31008	0.32407	0.517567	0.531092	0.71168	0.770105
CLU	10	0.108259	0.146877	0.132889	0.0480558	0.0201003	0.0135712	0.231934	0.392825	0.135817
CLUH	25	-0.0315003	-0.11421	-0.149718	0.333561	0.129081	0.016061	0.552607	0.55219	0.146064
CMAS	8	0.0492092	0.0179288	0.11453	0.368834	0.680308	0.10709	0.58423	0.892663	0.364343
CMBL	8	-0.0250491	0.0513094	0.111433	0.726003	0.270656	0.0208657	0.843573	0.678226	0.166509
CMC1	2	-0.573415	-0.19211	-0.0748496	0.0429649	0.291883	0.43104	0.225006	0.686063	0.708299
CMC2	4	-0.0631153	-0.147455	-0.0121468	0.911292	0.632481	0.954117	0.955951	0.874085	0.98363
CMPK1	7	0.0482765	0.118199	0.0548014	0.911593	0.137446	0.538555	0.956136	0.557744	0.78436
CMSS1	3	0.11692	0.099457	0.0896364	0.0949437	0.119196	0.219844	0.295395	0.545444	0.509287
CMTM4	1	0.0619797	0.060914	-0.00220778	0.291734	0.719413	0.978436	0.514148	0.909216	0.99339
CMTR1	12	-0.0633753	0.0361034	0.0464537	0.260975	0.535335	0.355436	0.4864	0.83075	0.644368
CNBP	5	0.0299939	-0.0384486	-0.0170568	0.888942	0.266262	0.311076	0.940393	0.674758	0.60377
CNDP2	18	-0.147029	-0.0209372	0.107333	0.057067	0.732058	0.226163	0.242692	0.915785	0.516082
CNIH4	1	0.145584	0.150787	0.059178	0.04139	0.0303857	0.160899	0.223057	0.426427	0.43999
CNK3/IPCEF1	1	-0.0257265	-0.167457	-0.318805	0.908959	0.464051	0.197212	0.954283	0.794485	0.484436
CNKSR1	1	-0.202746	-0.181291	-0.0686024	0.0647936	0.106216	0.410394	0.25338	0.53145	0.693841
CNN2	4	0.00585163	0.0572169	0.0257389	0.849724	0.257326	0.976287	0.917726	0.666967	0.993076
CNNM3	12	0.163936	0.130549	0.0213024	0.044433	0.0511468	0.618703	0.225724	0.455637	0.830904
CNNM4	10	0.0539302	-0.0132538	-0.0146657	0.358348	0.860907	0.549739	0.575658	0.960723	0.790499
CNOT1	38	-0.0260667	0.0295401	0.0752996	0.503303	0.648639	0.100267	0.692027	0.87834	0.352812
CNOT10	1	-0.567902	0.0203428	0.00271925	0.00936684	0.550315	0.604226	0.155137	0.83752	0.822405
CNOT11	1	-0.0367622	0.161526	0.099357	0.774893	0.116846	0.0856415	0.874986	0.54229	0.328172
CNOT2	4	0.566215	0.187635	0.13173	0.068851	0.392102	0.776618	0.258722	0.754389	0.91845
CNOT3	11	-0.0159353	-0.0342022	-0.0368918	0.925425	0.64697	0.91534	0.963108	0.87834	0.97117
CNOT4	3	0.123463	0.101945	-0.0107784	0.221142	0.0962343	0.708651	0.447882	0.523587	0.881775
CNOT6L	4	-0.00115636	0.0389733	0.0394056	0.747678	0.243109	0.324465	0.858404	0.659812	0.617408
CNOT7	5	-0.0877877	-0.13398	-0.118158	0.730997	0.21517	0.171952	0.847077	0.63956	0.452704
CNOT9	3	-0.0325707	-0.18944	-0.0752835	0.79642	0.584259	0.535816	0.88688	0.854779	0.782659
CNP	13	0.197752	0.134606	0.077686	0.0340266	0.253772	0.247778	0.212761	0.666747	0.541491
CNPY2	13	0.195495	0.045295	-0.0664046	0.516246	0.547392	0.196549	0.702253	0.836762	0.483759
CNPY3	10	-0.0929364	-0.0546306	-0.0681671	0.494255	0.400259	0.244195	0.6849	0.761955	0.537341
CNPY4	5	0.130908	0.0814807	-0.0112005	0.103569	0.371523	0.956605	0.308077	0.744378	0.985186
CNST	1	0.311241	0.121432	-0.0319617	0.288338	0.842812	0.644438	0.511498	0.955104	0.847125
CNTRL	4	-0.0725774	0.0853484	0.0179245	0.207988	0.349787	0.557059	0.432163	0.728187	0.794797
CNTROB	1	0.272717	0.10907	-0.149507	0.0756313	0.155628	0.467662	0.271077	0.580196	0.735921
COA1	2	0.0548234	0.0624183	0.0780756	0.313823	0.551856	0.138438	0.535263	0.838281	0.405977
COA3	4	-0.0471599	-0.0383379	0.0175512	0.938727	0.829517	0.287591	0.969248	0.950471	0.582592
COA6	4	-0.284464	-0.0265461	-0.0133141	0.296786	0.851103	0.948037	0.517615	0.95816	0.981512
COA7	3	-0.0471115	0.0303903	-0.0359266	0.99907	0.59024	0.631526	1	0.855929	0.839685
COASY	6	0.138865	0.0765197	-0.000933262	0.102815	0.969563	0.801472	0.30733	0.995398	0.929443
COBL	8	-0.0369151	0.0226427	0.0365965	0.633795	0.893528	0.936672	0.782689	0.972029	0.976929
COBLL1	13	-0.00288539	0.0208693	0.0786212	0.69484	0.63401	0.23593	0.823	0.87463	0.526979
COG1	13	0.0391499	0.160315	0.197277	0.463979	0.0188768	0.00246647	0.659625	0.389487	0.0584818
COG2	14	0.0181802	0.0792698	0.117584	0.783983	0.140698	0.0403035	0.879641	0.562151	0.227198
COG3	12	-0.0414723	0.126848	0.28503	0.458808	0.0428742	0.00094267	0.654967	0.441106	0.0372429
COG4	15	-0.00376546	0.0628164	0.120942	0.64455	0.11083	0.0104025	0.789858	0.536516	0.116931
COG5	20	0.0638864	0.0127584	0.103058	0.511603	0.870472	0.0446949	0.698886	0.963329	0.240013
COG6	10	0.303053	0.0916673	0.179146	0.222346	0.578777	0.151	0.448643	0.852294	0.425294
COG7	13	-0.114474	0.0446417	0.0903983	0.237026	0.259586	0.104765	0.463554	0.669862	0.360964
COG8	12	0.164397	0.14119	0.174067	0.0898003	0.033629	0.0108743	0.289177	0.429449	0.120819
COIL	13	-0.0312679	-0.031321	0.0886825	0.844734	0.830175	0.164841	0.914844	0.95071	0.443784
COL12A1	5	0.368101	0.0938541	0.155025	0.0522761	0.659898	0.534236	0.236432	0.884297	0.78133
COL18A1	5	0.118755	-0.162248	-0.102051	0.285584	0.283062	0.756584	0.509689	0.682055	0.908561
COL1A1	2	0.643282	0.556483	2.24285	0.191925	0.123161	2.31961e-05	0.415887	0.549773	0.00641716
COL5A1	1	-0.00473337	0.0344122	-0.0896085	0.871839	0.83175	0.134295	0.932358	0.951344	0.401425
COL6A3	1	-0.110548	0.0872342	-0.589769	0.507672	0.984486	0.123775	0.69487	0.99795	0.3882
COLGALT1	10	-0.00152299	0.0536481	0.0193694	0.839193	0.288288	0.607005	0.9116	0.684395	0.824118
COMMD1	3	0.0210308	0.177183	0.153311	0.64959	0.197973	0.469035	0.792424	0.624331	0.737022
COMMD10	3	-0.151813	-0.0313786	0.0506572	0.0556284	0.774734	0.214249	0.240204	0.9321	0.503354
COMMD2	5	-0.0686955	-0.0968622	-0.115513	0.118986	0.194038	0.0193181	0.327116	0.619691	0.159726
COMMD3	5	-0.113583	0.0287513	0.0263801	0.0756298	0.633391	0.676061	0.271077	0.874246	0.863631
COMMD4	4	-0.0241009	0.141796	0.163722	0.972247	0.0487777	0.00622465	0.986586	0.450157	0.0926007
COMMD5	5	-0.0488179	0.0382	0.0434005	0.76906	0.477661	0.635254	0.871014	0.800991	0.842276
COMMD6	3	-0.125025	-0.122807	-0.0423563	0.253683	0.154503	0.831764	0.479491	0.578991	0.938033
COMMD7	2	-0.207854	0.271211	0.232664	0.0926845	0.103862	0.030072	0.2919	0.528292	0.195392
COMMD8	2	-0.117544	0.00538427	-0.113335	0.183204	0.835154	0.0997131	0.406032	0.95243	0.35192
COMMD9	7	0.0613468	-0.0116339	-0.018203	0.393133	0.877595	0.70051	0.602284	0.966193	0.877291
COMT	15	0.0682835	-0.0555548	-0.0460205	0.875242	0.314419	0.40165	0.93364	0.706342	0.687651
COMTD1	3	-0.187194	-0.118029	-0.171954	0.0900094	0.212246	0.0477698	0.289488	0.637168	0.248222
COPA	50	0.0520376	0.0584231	0.0856855	0.379788	0.2739	0.0412623	0.59118	0.679285	0.229805
COPB1	38	-0.161779	-0.0425087	0.04494	0.0525004	0.816617	0.335306	0.236651	0.944872	0.626472
COPB2	25	-0.107509	-0.0357822	0.0202808	0.074806	0.483844	0.660753	0.269497	0.803209	0.856191
COPE	12	0.0225028	0.00915712	0.114226	0.762932	0.710125	0.125035	0.868079	0.90729	0.390248
COPG1	29	-0.116293	-0.0689319	-0.00683389	0.017324	0.127328	0.849712	0.174555	0.552158	0.945874
COPG2	25	-0.0594953	0.00164939	0.0738658	0.30107	0.874021	0.101654	0.522415	0.963549	0.355906
COPRS	2	-0.313884	-0.124975	-0.159291	0.48298	0.719325	0.721324	0.676699	0.909216	0.888653
COPS2	17	-0.0757617	-0.00506547	0.00282386	0.329116	0.646703	0.822033	0.548714	0.87834	0.93578
COPS3	11	-0.105912	-0.0279776	0.025744	0.16848	0.969459	0.560734	0.387903	0.995398	0.797383
COPS4	17	0.0441033	0.0658819	0.0657572	0.429171	0.27342	0.150292	0.632709	0.67885	0.423921
COPS5	6	0.265616	0.0735465	0.0116526	0.152741	0.667572	0.612191	0.371107	0.88695	0.827204
COPS6	3	0.276758	0.31259	0.28414	0.182128	0.0451297	0.0727061	0.40481	0.44401	0.304704
COPS7A	8	-0.123311	-0.0332339	0.0741452	0.150673	0.337412	0.610558	0.368951	0.719228	0.826012
COPS7B	7	-0.317105	-0.173379	-0.0537222	0.0682881	0.0711708	0.646528	0.258432	0.488726	0.847466
COPS8	6	0.0291034	-0.142891	-0.0938841	0.920597	0.102046	0.0670024	0.960403	0.528292	0.292367
COPS9	1	0.0555771	-0.0760757	0.00396544	0.780025	0.334167	0.912768	0.878091	0.715899	0.970713
COPZ1	6	-0.0958822	-0.17928	-0.14168	0.213433	0.18512	0.0201625	0.438591	0.613688	0.163895
COQ3	3	0.172537	0.0454824	0.231219	0.00835332	0.320678	0.000301027	0.153964	0.710508	0.0208983
COQ4	1	0.182199	0.0778127	0.23744	0.0160252	0.362139	0.0185771	0.172773	0.738271	0.156958
COQ5	8	0.183897	0.107961	0.129889	0.0772888	0.126644	0.114565	0.273153	0.552158	0.375835
COQ6	5	0.256003	0.154391	0.125785	0.000501325	0.019644	0.00338746	0.0654781	0.390799	0.0684909
COQ7	6	0.10859	0.0259513	0.0896374	0.0822173	0.468343	0.0898494	0.279382	0.795784	0.335051
COQ8A	4	0.713405	0.345482	0.389145	0.00143834	0.0471396	0.0252385	0.0989633	0.446811	0.183021
COQ8B	10	0.280998	0.151646	0.134746	0.000494638	0.00215314	0.0021306	0.0654781	0.223231	0.0547279
COQ9	7	0.0478811	0.116689	0.0328874	0.627482	0.102264	0.566692	0.77926	0.528292	0.801497
CORO1A	15	-0.0493467	0.106837	0.121628	0.633958	0.175896	0.058073	0.782689	0.60467	0.271548
CORO1B	16	-0.0634996	0.00135311	-0.00777856	0.133825	0.743586	0.646717	0.345011	0.919647	0.847466
CORO1C	19	-0.0506906	-0.102538	-0.0916114	0.283494	0.142231	0.0948702	0.508047	0.564522	0.345199
CORO2A	6	0.110216	0.123475	-0.000852868	0.208218	0.201755	0.632512	0.432253	0.628416	0.839798
CORO7	18	0.030676	0.0526275	0.0400866	0.767198	0.789987	0.656988	0.870055	0.935409	0.853186
COTL1	9	0.0472787	0.155567	0.170499	0.776674	0.019606	0.000734177	0.876288	0.390799	0.0340818
COX11	2	-0.103975	-0.0524607	-0.168855	0.529565	0.805897	0.603349	0.712311	0.941211	0.822393
COX14	1	-0.0430631	0.0705289	-0.00150641	0.604552	0.842737	0.860445	0.765978	0.955104	0.950895
COX15	3	0.0757683	0.131842	0.0826228	0.22676	0.111683	0.234956	0.452556	0.536516	0.526041
COX16	4	-0.240543	-0.313644	-0.334681	0.0105387	0.0026673	0.000948695	0.156339	0.23454	0.0372429
COX17	1	0.15252	0.154299	0.253905	0.953578	0.960501	0.543585	0.977294	0.993986	0.786838
COX19	2	0.0115298	-0.0816892	-0.0762058	0.96004	0.136715	0.135086	0.980656	0.555951	0.402542
COX4I1	13	-0.00660329	-0.0190043	0.032008	0.491393	0.734213	0.27396	0.683145	0.917113	0.56943
COX5A	9	0.0996521	-0.0248957	-0.072626	0.0475959	0.50392	0.0721369	0.230993	0.813083	0.304262
COX5B	9	0.0623434	-0.00941895	0.0373797	0.104094	0.909434	0.264919	0.308636	0.979171	0.560074
COX6B1	6	-0.23478	-0.242596	-0.275882	0.271765	0.169989	0.112669	0.496743	0.598293	0.373109
COX6C	5	0.0824905	-0.144057	-0.167457	0.516346	0.0396057	0.000862825	0.702253	0.431686	0.0361355
COX7A2	2	0.00105969	-0.0383427	0.0171096	0.763829	0.913583	0.757725	0.86828	0.98085	0.909223
COX7A2L	4	-0.398519	-0.357647	-0.167791	0.0688605	0.107089	0.270617	0.258722	0.532122	0.568066
COX7B	1	-0.0454779	0.0359498	0.129057	0.469852	0.61899	0.025333	0.664589	0.867892	0.183301
COX7C	2	-0.0411467	0.0143475	0.0807364	0.672192	0.683107	0.159636	0.808	0.893874	0.438277
COX8A	1	0.0725682	0.0811235	0.0469268	0.740845	0.662077	0.982243	0.853058	0.884683	0.99346
CPD	17	0.350411	0.186685	0.118662	0.00640768	0.0335396	0.116404	0.148278	0.429449	0.378643
CPEB4	2	-0.236166	-0.217739	-0.225906	0.00280825	0.0471154	0.00324451	0.118382	0.446811	0.0673914
CPM	2	0.100186	0.0991587	0.0916748	0.273625	0.260413	0.0965207	0.498595	0.670673	0.347565
CPNE1	6	-0.0872999	0.063153	0.0925333	0.17769	0.205402	0.170712	0.399557	0.632081	0.451135
CPNE3	17	-0.0618488	0.0562687	0.082543	0.611716	0.456237	0.396935	0.770071	0.788111	0.68322
CPNE4	2	0.187797	0.152787	0.11267	0.0991504	0.230864	0.304324	0.30179	0.650447	0.597787
CPOX	10	0.129651	0.00480078	0.0147404	0.029857	0.653691	0.469539	0.206477	0.880414	0.737022
CPPED1	3	0.457634	-0.0140192	-0.107373	0.0791378	0.757704	0.193509	0.275321	0.925923	0.480562
CPSF1	21	0.0415374	-0.0447936	-0.0205278	0.341501	0.583877	0.771292	0.559267	0.854578	0.915756
CPSF2	19	0.0060203	-0.0510197	-0.0534472	0.822858	0.341398	0.425695	0.90214	0.72223	0.704467
CPSF3	12	-0.0133446	-0.0943389	-0.136394	0.873963	0.0849897	0.0224553	0.93318	0.505486	0.171647
CPSF4	3	-0.177045	-0.041667	0.0223342	0.302588	0.930995	0.324732	0.523399	0.986077	0.617416
CPSF6	14	0.104277	-0.112486	-0.024753	0.0332865	0.14875	0.783591	0.212496	0.574569	0.921323
CPSF7	16	0.197459	0.107869	0.0446768	0.00586561	0.135424	0.592086	0.145224	0.554972	0.816273
CPT1A	25	0.0381942	-0.00917913	-0.0205201	0.313117	0.817687	0.587793	0.534432	0.945208	0.814534
CPT2	22	0.050168	0.0828043	0.117628	0.125487	0.0464554	0.0194728	0.334026	0.444443	0.159976
CRABP1	5	-0.112832	0.136936	0.240642	0.29645	0.422098	0.148255	0.517615	0.774928	0.421155
CRABP2	9	-0.165358	-0.208823	-0.0743398	0.0617059	0.0146856	0.22378	0.248956	0.367426	0.513841
CRACDL	6	-0.011838	0.13215	0.0595585	0.881183	0.0270551	0.333149	0.93596	0.409148	0.624786
CRACR2A	7	0.0156275	-0.0261613	-0.0674015	0.671835	0.637599	0.168288	0.807796	0.876443	0.448108
CRADD	5	0.404317	0.0793592	0.0812836	0.0646015	0.908854	0.970476	0.25338	0.979037	0.990891
CRAT	4	0.225623	0.138085	0.0597225	0.0157783	0.480174	0.511369	0.172773	0.801969	0.766326
CRCP	2	-0.00975854	0.0135928	-0.412825	0.883072	0.673205	0.000108642	0.937063	0.889107	0.0132491
CREB1	4	0.0661689	-0.0811425	-0.131366	0.865788	0.583266	0.0318135	0.928697	0.854228	0.200966
CREB3L4	2	0.188924	0.216764	0.160364	0.0469226	0.0690644	0.0368119	0.229432	0.483564	0.21821
CREBBP	11	-0.0389133	-0.0238797	0.0384354	0.835591	0.803632	0.259247	0.909313	0.939985	0.554625
CREBZF	3	-0.0773841	-0.16085	-0.0961298	0.537543	0.123763	0.0973454	0.718901	0.550221	0.348671
CREG1	2	-0.0457964	-0.0741046	-0.03601	0.297859	0.259996	0.686435	0.518829	0.670076	0.870297
CRELD1	2	0.0919394	0.0313933	-0.0434726	0.598177	0.949828	0.289847	0.760409	0.990972	0.583923
CRELD2	3	0.00670016	0.28917	0.156889	0.557148	0.37298	0.864402	0.734037	0.744607	0.952035
CRIP1	1	-0.420523	-0.0509133	-0.195673	4.99939e-05	0.996569	0.0106197	0.0256835	0.999771	0.11843
CRIP2	6	-0.0723089	-0.00224941	0.00858609	0.121102	0.743324	0.622154	0.329523	0.919647	0.833317
CRIPT	1	-0.381515	0.172395	0.174191	0.254269	0.286958	0.355524	0.480244	0.68382	0.644368
CRK	11	-0.142392	-0.123683	0.0384368	0.0420897	0.238749	0.291935	0.223601	0.656343	0.584165
CRKL	7	-0.181304	-0.0856964	0.0429512	0.0263485	0.114255	0.936152	0.19984	0.539822	0.976697
CRLF3	4	-0.343859	-0.0967626	-0.370115	0.00911617	0.187614	0.00017927	0.155137	0.613848	0.0162679
CRNKL1	24	-0.0672816	-0.0110328	-0.079642	0.52523	0.81854	0.44579	0.709328	0.945208	0.720482
CROCC	13	0.0950674	0.011575	-0.0723968	0.133239	0.456958	0.418017	0.344178	0.788473	0.700012
CROT	2	-0.116351	0.0303767	0.121453	0.713215	0.742408	0.132047	0.833743	0.919647	0.398177
CRTAP	7	-0.144578	-0.258673	-0.365962	0.0363217	0.00323013	0.00060138	0.215138	0.245998	0.0300924
CRTC2	2	-0.0231076	0.0621466	0.0171294	0.97605	0.321465	0.94334	0.988421	0.711092	0.980229
CRYBG1	20	-0.0184385	-0.0220464	-0.0809582	0.716034	0.616233	0.0925083	0.836024	0.866469	0.34049
CRYL1	2	-0.0900761	-0.0224402	-0.0388133	0.0978044	0.73621	0.610442	0.299436	0.917384	0.826012
CRYZ	7	0.0550043	0.058012	0.0745718	0.166875	0.173778	0.0407516	0.385807	0.600936	0.228892
CRYZL1	3	-0.0448788	0.0938927	0.0854485	0.313557	0.202052	0.264195	0.534963	0.628588	0.55931
CS	12	0.0285174	0.0960911	0.100593	0.577691	0.239352	0.0689359	0.746693	0.656343	0.29578
CSAD	2	-0.0196361	-0.144633	-0.0642683	0.701453	0.418015	0.428856	0.827241	0.772914	0.706587
CSDE1	29	-0.444162	-0.300005	-0.321192	9.14527e-05	0.00113157	0.000178706	0.0287331	0.169816	0.0162679
CSE1L	41	-0.0485868	-0.0318058	-0.0103598	0.168258	0.277823	0.590042	0.387505	0.679868	0.815581
CSK	9	0.0973256	0.0983077	0.0452008	0.344747	0.161423	0.482963	0.562486	0.589906	0.746732
CSNK1A1	10	-0.206513	-0.0763319	-0.0683589	0.0104217	0.211291	0.380723	0.156211	0.635521	0.66883
CSNK1D	6	-0.187948	-0.160101	-0.136913	0.0152172	0.0438171	0.0198383	0.172773	0.443639	0.161942
CSNK1E	1	-0.391299	0.112172	-0.0866429	0.0907793	0.522672	0.540331	0.28975	0.824675	0.785029
CSNK1G3	7	0.136612	0.0366615	-0.0199158	0.183701	0.58713	0.2955	0.406547	0.85544	0.587796
CSNK2A1	11	-0.0319302	0.0393453	0.0521809	0.719182	0.457826	0.198133	0.838429	0.788873	0.485781
CSNK2A2	6	-0.22793	-0.0387867	-0.0746925	0.00642711	0.639013	0.411947	0.148278	0.876757	0.695696
CSNK2B	4	0.0556547	-0.0670841	-0.0379769	0.575728	0.111046	0.32584	0.745279	0.536516	0.617998
CSPP1	2	0.151609	-0.0333854	-0.215376	0.265213	0.24317	0.0100612	0.491154	0.659812	0.114986
CSRNP3	1	-0.500383	-0.614804	-0.368887	0.000224508	0.00950175	0.0116093	0.0455279	0.344213	0.124252
CSRP1	11	-0.0930962	0.0653133	0.139935	0.284177	0.325322	0.0299626	0.508562	0.712513	0.19512
CSRP2	2	0.117856	-0.201869	0.0862994	0.270448	0.0468914	0.645141	0.495382	0.445555	0.847302
CST3	3	0.077996	0.0930557	0.249447	0.391145	0.196706	0.0434651	0.600909	0.622654	0.236541
CSTA	2	-0.132181	0.0290101	0.119588	0.326154	0.310818	0.0149564	0.546379	0.704607	0.141416
CSTB	4	-0.0332537	0.0531547	0.0856548	0.87452	0.711129	0.0805929	0.933516	0.907579	0.319141
CSTF1	9	0.557069	0.304544	0.136003	0.0233056	0.208471	0.512524	0.189799	0.633219	0.766961
CSTF2	4	-0.0521061	-0.0703327	-0.0306747	0.303753	0.0735425	0.548913	0.525	0.493388	0.789902
CSTF2T	7	0.305546	-0.00682056	-0.0315367	0.0397072	0.734057	0.315877	0.221087	0.917113	0.608619
CSTF3	15	-0.0331368	0.0152992	0.053182	0.978539	0.495752	0.327111	0.989063	0.809536	0.618733
CTBP1	8	0.122323	0.0835534	0.10577	0.0576118	0.948582	0.0287294	0.243665	0.990753	0.192848
CTBP2	13	0.158682	0.06191	0.0226154	0.0377175	0.360007	0.249	0.216581	0.737038	0.541741
CTBS	6	0.171054	0.118783	0.0614343	0.0876778	0.151069	0.347748	0.286234	0.577576	0.63849
CTCF	9	0.0968543	0.0477075	0.13311	0.162866	0.416459	0.0291748	0.382344	0.772701	0.193964
CTDP1	9	-0.0730971	0.0215196	0.0349237	0.150448	0.923967	0.375529	0.36875	0.983805	0.664475
CTDSP1	2	0.174534	0.132846	0.0191813	0.109184	0.404216	0.796406	0.315097	0.762892	0.926635
CTDSPL2	3	0.15655	0.0272891	0.0700035	0.227976	0.87915	0.430207	0.45395	0.967047	0.707614
CTIF	1	-0.133307	0.280106	-0.300371	0.244033	0.166103	0.0743449	0.471656	0.595318	0.307414
CTNNA1	51	0.0126561	0.014589	0.0244171	0.787478	0.987036	0.614025	0.882406	0.998658	0.827795
CTNNAL1	2	0.119412	-0.0166153	0.120997	0.616999	0.438609	0.506843	0.772351	0.778798	0.763285
CTNNB1	22	0.00999017	0.0151117	-0.0489286	0.721187	0.743098	0.424038	0.840131	0.919647	0.703086
CTNNBIP1	2	-0.509609	0.24206	0.0280587	0.0728136	0.460027	0.740641	0.265547	0.790889	0.900644
CTNNBL1	13	-0.0437369	-0.0658846	-0.0561158	0.830161	0.645137	0.894298	0.906923	0.87834	0.96281
CTNND1	32	0.148466	-0.0671293	-0.0895572	0.024498	0.355425	0.316612	0.19402	0.732752	0.60904
CTNND2	12	0.288094	0.0900615	0.00893467	0.0393329	0.575568	0.780049	0.220116	0.850634	0.919966
CTPS1	14	0.0693932	-0.00391098	-0.0624127	0.649701	0.957549	0.55081	0.792434	0.993894	0.791042
CTPS2	8	0.0540371	0.106374	0.0840683	0.25083	0.0705968	0.10962	0.476904	0.487036	0.367594
CTR9	15	0.0167354	-0.0383042	0.0267294	0.995787	0.518943	0.744439	0.998379	0.821329	0.901993
CTSA	7	0.138874	0.199183	0.19932	0.00706785	0.0116809	0.000420924	0.150726	0.350127	0.0253409
CTSB	9	0.160598	0.0724093	0.0850837	0.505643	0.938283	0.755656	0.693694	0.988034	0.908154
CTSC	2	-0.0863663	-0.0412436	-0.0973909	0.0891587	0.516394	0.14045	0.288074	0.820469	0.409233
CTSD	18	0.190124	0.0325933	0.119575	0.00207208	0.455693	0.0145348	0.11166	0.788028	0.139831
CTSH	1	0.0874231	0.168903	0.231589	0.0987822	0.124471	0.00236989	0.301179	0.551364	0.0575546
CTSL	5	0.197858	0.11243	0.13595	0.00141738	0.0494942	0.00377322	0.0989633	0.45083	0.0714334
CTSZ	1	0.467117	0.132515	0.144622	0.145353	0.772192	0.706058	0.361435	0.930953	0.880627
CTTN	34	-0.127445	-0.0277453	-0.0302901	0.0712975	0.614159	0.522515	0.263132	0.866003	0.773287
CTTNBP2NL	5	-0.113997	-0.0376281	-0.0033547	0.0255859	0.417504	0.514139	0.197653	0.772829	0.767672
CTU2	7	-0.181422	-0.101365	-0.0899978	0.017111	0.0739315	0.042261	0.174555	0.494116	0.233618
CTXN1	1	0.146794	0.096158	-0.0633363	0.0464052	0.322189	0.613339	0.22806	0.711196	0.827738
CUEDC1	2	-0.781117	-0.397377	-0.758922	0.0124214	0.121713	0.0168833	0.162097	0.549596	0.149888
CUL1	16	-0.0716677	0.0471747	0.075713	0.275878	0.23523	0.0457448	0.500159	0.652704	0.242943
CUL2	14	-0.0059358	0.0391348	-0.00476429	0.987996	0.386141	0.952164	0.994838	0.751573	0.982903
CUL3	22	-0.149461	-0.0380462	0.0320311	0.0726749	0.712349	0.285429	0.265544	0.907748	0.580501
CUL4A	13	0.0395242	0.137746	0.136713	0.392354	0.0465449	0.00899339	0.601448	0.444443	0.109484
CUL4B	27	0.00672457	0.00203236	0.0572894	0.650062	0.614944	0.63806	0.792749	0.866415	0.843767
CUL5	9	-0.0851565	0.0639281	0.0609829	0.23827	0.15433	0.09263	0.464823	0.578991	0.340719
CUL7	7	-0.0574839	0.0139395	-0.0837529	0.259645	0.477032	0.103473	0.485209	0.800581	0.359262
CUL9	2	0.471828	0.0726948	0.139329	0.188018	0.987568	0.982156	0.411477	0.998684	0.99346
CUSTOS	5	0.0151474	-0.0495181	0.031657	0.902823	0.233275	0.782668	0.950301	0.651412	0.920785
CUTA	4	-0.194852	-0.0243164	-0.0792529	0.02241	0.375148	0.126306	0.187708	0.745981	0.391444
CUTC	2	0.000171727	0.210336	0.329447	0.762514	0.00409337	0.000186191	0.867937	0.267318	0.0163044
CUX1	10	-0.00360725	0.0589712	0.0418651	0.856408	0.230153	0.176704	0.923004	0.649875	0.460494
CUX1	37	-0.068334	-0.116523	-0.0101093	0.487393	0.230094	0.930572	0.679749	0.649875	0.974993
CWC15	6	-0.0125732	-0.0752359	-0.01536	0.969004	0.182628	0.570399	0.984852	0.610489	0.802452
CWC22	9	-0.0891314	-0.0473019	-0.0118594	0.452472	0.610419	0.941917	0.649496	0.8646	0.979722
CWC25	6	0.0294698	-0.0874934	-0.10584	0.714863	0.299288	0.188614	0.835036	0.693837	0.47344
CWC27	6	-0.0268859	0.0487287	0.0195549	0.438081	0.936983	0.793846	0.639251	0.987763	0.926354
CWF19L1	10	-0.0582554	-0.0188835	0.0306062	0.375707	0.791808	0.215495	0.588802	0.93596	0.50505
CWF19L2	8	-0.113458	-0.000382796	-0.185459	0.584779	0.952221	0.229272	0.751956	0.991576	0.519358
CXCL16	1	0.0161622	-0.0537031	-0.241529	0.680678	0.553063	0.209602	0.81373	0.839003	0.499716
CXorf38	9	-0.105927	0.10424	0.151968	0.326891	0.0754047	0.0160169	0.54693	0.495388	0.146064
CXXC1	7	-0.0118806	-0.0372066	-0.122002	0.551783	0.276399	0.125614	0.73009	0.679382	0.390789
CXXC5	5	-0.244051	-0.258497	-0.204496	0.200051	0.153416	0.194709	0.423282	0.578991	0.481832
CYB561	2	-0.0982294	-0.142166	-0.0424885	0.290385	0.213783	0.675465	0.513352	0.638284	0.863279
CYB561A3	1	0.269832	-0.0770513	-0.215466	0.712508	0.582598	0.101433	0.833423	0.853703	0.355328
CYB5A	5	0.0444361	-0.044638	-0.00352824	0.564019	0.393711	0.872183	0.736916	0.756405	0.955164
CYB5B	6	0.116429	-0.0161709	0.100393	0.251853	0.328002	0.389808	0.477788	0.712981	0.676546
CYB5R1	9	0.098363	0.0635257	0.0228101	0.049804	0.266845	0.264897	0.233307	0.674973	0.560074
CYB5R3	11	0.178568	0.078163	0.135295	0.0078014	0.146049	0.0301643	0.153198	0.56965	0.195573
CYB5R4	2	0.0230572	-0.0821499	-0.0952909	0.962149	0.564943	0.133882	0.981745	0.84555	0.400813
CYBA	2	0.0262853	-0.24432	-0.264566	0.623784	0.0487275	0.00332468	0.77747	0.450157	0.0679576
CYBC1	3	0.0709364	0.0367931	0.101756	0.143259	0.348597	0.0423488	0.358743	0.727625	0.233731
CYC1	10	0.176315	0.0630607	-0.0225799	0.100859	0.774529	0.701501	0.304791	0.9321	0.878119
CYCS	7	-0.0300857	0.00393287	0.0107195	0.88779	0.680264	0.441425	0.939961	0.892663	0.716735
CYFIP1	19	-0.205668	-0.0460074	0.0943186	0.13663	0.997923	0.146104	0.349095	1	0.417631
CYFIP2	3	0.0307021	0.10881	0.0447486	0.360383	0.330186	0.43115	0.577756	0.712981	0.708299
CYHR1	1	-0.253931	-0.166336	0.0427432	0.0704833	0.146072	0.532038	0.261756	0.56965	0.779669
CYP1B1	6	-0.156313	-0.105073	-0.14246	0.215521	0.3149	0.175497	0.440893	0.706342	0.458278
CYP20A1	8	0.0351901	0.0955933	0.106403	0.166244	0.0793377	0.0214928	0.384824	0.498219	0.169015
CYP4F2	1	0.226287	0.114084	0.112578	0.155488	0.121812	0.172211	0.372455	0.549596	0.453076
CYP51A1	10	-0.121148	-0.144687	0.138369	0.0403486	0.0294595	0.0624702	0.222651	0.420398	0.280861
CYRIB	13	-0.0555661	-0.0442903	-0.00287799	0.377077	0.705168	0.613717	0.589289	0.905701	0.827795
CYSTM1	2	-0.0656295	-0.0606265	-0.174267	0.587086	0.62115	0.037294	0.754265	0.868862	0.219212
CYTH1	1	0.225985	0.0918899	0.0543674	0.0403755	0.390471	0.59775	0.222651	0.754127	0.819328
CYTH2	4	-0.0242369	-0.169839	-0.0645943	0.478837	0.127614	0.392083	0.673214	0.552158	0.679256
CYTH3	1	0.401531	0.306839	0.257104	0.00131776	0.0151301	0.00725905	0.0967108	0.368965	0.100214
CZIB	7	0.148612	-0.0322019	-0.0632864	0.603377	0.598649	0.220289	0.764992	0.858756	0.509621
D2HGDH	8	0.0819613	0.0745739	0.0509801	0.125419	0.388012	0.37961	0.33396	0.752499	0.668329
DAAM1	17	-0.00572668	0.000962069	-0.0117482	0.804848	0.975836	0.76629	0.89291	0.99704	0.913924
DAB2IP	2	0.212328	-0.185847	-0.126626	0.231653	0.0718113	0.1957	0.457816	0.489608	0.48258
DAD1	3	0.162713	0.0508065	0.0879617	0.0096363	0.196818	0.0612003	0.155676	0.622654	0.277532
DAG1	18	-0.00917932	-0.0183158	-0.0143561	0.626601	0.566832	0.660868	0.778553	0.845693	0.856195
DAGLB	8	0.146204	0.0209501	0.0459495	0.035627	0.67356	0.617284	0.214947	0.889118	0.82998
DALRD3	2	-0.00607276	0.174148	-0.0179802	0.95933	0.0918725	0.875774	0.9803	0.518279	0.956122
DAP	3	-0.291633	-0.228107	-0.194342	0.00768816	0.0175192	0.0372221	0.152481	0.388296	0.218957
DAP3	12	0.0224525	-0.0122588	-0.0301467	0.970908	0.637562	0.206131	0.98595	0.876443	0.494689
DAPK3	2	0.311464	-0.014821	-0.0558587	0.645538	0.789062	0.311621	0.790237	0.93522	0.604088
DARS1	28	0.0380395	0.0815939	0.101369	0.552807	0.122506	0.0903952	0.730692	0.549773	0.336352
DARS2	20	0.0794337	0.0398392	0.0607284	0.07718	0.350114	0.124168	0.273153	0.728187	0.388801
DAXX	7	0.0349431	-0.0214798	0.0586539	0.349303	0.714082	0.181443	0.567233	0.908306	0.46632
DAZAP1	8	0.0952802	0.00735537	-0.0145068	0.283009	0.649106	0.797584	0.50744	0.87834	0.926886
DBI	6	-0.282266	-0.212729	-0.111535	0.0128612	0.0448922	0.0950006	0.165443	0.44401	0.345318
DBN1	16	0.0329316	-0.0803773	-0.0699003	0.386513	0.28667	0.46516	0.597154	0.68382	0.734985
DBNDD1	3	-0.0980313	-0.0468506	0.113643	0.367475	0.28066	0.212295	0.583268	0.680831	0.501923
DBNL	17	0.296186	0.028669	0.0371746	0.0803244	0.925454	0.929658	0.276825	0.984494	0.974993
DBP	1	0.936049	0.543252	0.354363	0.0166111	0.264653	0.50253	0.172773	0.673898	0.759945
DBR1	7	-0.138637	-0.167861	-0.144291	0.0588965	0.0417828	0.212466	0.244883	0.43926	0.501923
DBT	4	0.160895	0.126303	0.104249	0.0215602	0.0139308	0.0136568	0.186959	0.359999	0.13632
DCAF1	17	0.0429921	0.097633	0.10932	0.247537	0.0426258	0.0060499	0.474507	0.441106	0.090739
DCAF10	1	0.0203176	0.242225	0.0839209	0.446993	0.185116	0.628635	0.645296	0.613688	0.838259
DCAF11	6	0.135536	0.120773	0.125134	0.0108082	0.013301	0.0138739	0.156984	0.356507	0.137067
DCAF13	7	-0.216222	-0.203929	-0.220821	0.00624887	0.0101148	0.00582848	0.147259	0.344213	0.0885883
DCAF15	2	-0.0467589	-0.0304818	-0.214547	0.165616	0.317302	0.00573019	0.384221	0.708528	0.0879309
DCAF4	3	-0.0357822	0.07651	-0.0694823	0.538608	0.395356	0.406966	0.719701	0.758241	0.691997
DCAF5	6	-0.0335816	-0.258876	-0.294982	0.244559	0.0810069	0.000118782	0.471656	0.498219	0.0136617
DCAF6	4	0.0816053	0.121021	-0.0148272	0.200043	0.094403	0.804094	0.423282	0.521858	0.929668
DCAF7	9	-0.0789133	0.0429315	-0.027855	0.148106	0.475958	0.646796	0.365198	0.800466	0.847466
DCAF8	6	0.193761	0.0903219	0.069984	0.192248	0.338024	0.575959	0.415973	0.719463	0.805612
DCAKD	2	0.15519	0.151609	0.187822	0.101564	0.0139826	0.0577293	0.305656	0.359999	0.27134
DCBLD1	1	0.155616	-0.0841278	-0.263713	0.867557	0.37125	0.0120724	0.929948	0.744378	0.127476
DCBLD2	1	-0.296501	0.0110758	-0.0511891	0.456973	0.325704	0.846823	0.653599	0.712628	0.944646
DCDC2	1	0.0152193	0.10296	0.125851	0.701364	0.164348	0.172997	0.827241	0.593749	0.454369
DCK	3	0.0342708	0.0431657	0.0161635	0.820038	0.541399	0.688184	0.901513	0.833071	0.871319
DCLK1	5	-0.15553	0.0362486	-0.0443662	0.00595126	0.676558	0.181987	0.145224	0.891206	0.466808
DCLRE1A	2	-0.0371106	-0.072336	-0.0480846	0.582509	0.351792	0.67091	0.750763	0.72972	0.861672
DCLRE1B	1	-0.0500256	-0.0354219	-0.0733889	0.559127	0.866132	0.286913	0.734674	0.963146	0.582016
DCP1A	4	-0.0962319	0.0233212	0.0787345	0.365879	0.844739	0.628016	0.582173	0.955527	0.837833
DCP1B	3	0.366737	0.178587	0.118822	0.0173141	0.294891	0.672809	0.174555	0.690785	0.862361
DCP2	2	-0.147947	0.0099326	-0.0654922	0.612628	0.87923	0.642943	0.770071	0.967047	0.846203
DCPS	5	-0.0138531	-0.0393173	0.0320788	0.624273	0.704982	0.676803	0.777698	0.905701	0.86377
DCTN1	47	0.0262687	0.0215762	-0.00986874	0.929647	0.936885	0.534495	0.965349	0.987763	0.781559
DCTN2	15	-0.0832795	-0.115279	-0.118714	0.0893656	0.0333761	0.0646839	0.288139	0.429449	0.286557
DCTN3	10	-0.164357	-0.0352603	0.00758113	0.044661	0.431708	0.94868	0.225724	0.776188	0.981512
DCTN4	11	-0.0707596	0.00682092	-0.0190284	0.232487	0.992259	0.830566	0.458569	0.998838	0.937846
DCTN6	4	0.021621	-0.0185703	-0.0473944	0.955005	0.776152	0.209653	0.977764	0.932191	0.499716
DCTPP1	11	-0.0915953	-0.119776	-0.0827778	0.196885	0.0327818	0.110727	0.421093	0.428432	0.370017
DCUN1D1	6	-0.11989	-0.0170428	0.0624316	0.195572	0.882724	0.171667	0.420089	0.968295	0.452432
DCUN1D3	1	0.535008	-0.240694	-0.246245	0.123836	0.118854	0.0867642	0.331777	0.544202	0.330006
DCUN1D4	2	-0.077268	-0.0466595	0.0155397	0.488626	0.848021	0.887361	0.680671	0.956926	0.961744
DCUN1D5	1	0.11472	-0.263387	0.000487065	0.15295	0.0920866	0.903365	0.371107	0.518886	0.96618
DCXR	9	0.411462	0.135756	0.0221684	0.05341	0.775609	0.836132	0.237462	0.932191	0.939794
DDA1	2	-0.133372	0.119062	0.148682	0.796681	0.251306	0.166775	0.887043	0.665375	0.44635
DDAH1	10	-0.0529336	0.034905	0.121589	0.448453	0.454654	0.00540042	0.646302	0.787849	0.0852779
DDAH2	8	-0.106533	-0.114256	-0.158051	0.776877	0.546338	0.311123	0.876351	0.836762	0.60377
DDB1	40	-0.0153238	-0.044105	0.0125368	0.947077	0.577566	0.530118	0.973741	0.851488	0.778557
DDB2	8	0.254506	0.215321	0.171434	0.0213758	0.0344447	0.059951	0.18676	0.429449	0.275724
DDHD1	5	-0.0807006	-0.0513483	-0.0556487	0.318822	0.616451	0.407335	0.540322	0.866469	0.692155
DDHD2	1	0.670746	0.233048	-0.17836	0.0527823	0.396778	0.30667	0.23689	0.759921	0.600254
DDI2	7	-0.0789276	0.0413148	0.0411224	0.11097	0.756117	0.373407	0.317069	0.925361	0.663004
DDOST	13	0.161837	0.0943312	0.0380482	0.0338868	0.0520363	0.424169	0.212761	0.457212	0.703086
DDR1	21	-0.0101895	-0.041134	-0.0244722	0.804756	0.686619	0.704238	0.89291	0.895277	0.879891
DDRGK1	8	-0.0422536	-0.122365	-0.115489	0.597732	0.0407101	0.0544651	0.760086	0.435562	0.263686
DDT	6	-0.152943	-0.164558	-0.0719257	0.0279783	0.0347133	0.209358	0.203755	0.429449	0.499477
DDX1	30	0.0754438	0.0657317	0.0465682	0.172006	0.189381	0.19727	0.392269	0.615249	0.484436
DDX10	12	0.0228179	-0.038476	-0.00597227	0.594363	0.681128	0.86276	0.758297	0.892977	0.951679
DDX17	26	0.024867	-0.0938616	-0.122594	0.870527	0.0353322	0.0154648	0.931835	0.429449	0.142721
DDX18	18	0.0710936	0.0391517	0.040214	0.106627	0.300962	0.247669	0.311946	0.695309	0.54143
DDX19A	12	-0.0611433	0.0333615	-0.00941133	0.182436	0.619147	0.781716	0.405378	0.867955	0.92013
DDX19B	1	-0.246321	-0.155728	-0.0824268	0.0642334	0.265945	0.588539	0.25338	0.674584	0.814946
DDX20	10	-0.00417227	0.0212743	-0.0605683	0.918334	0.538946	0.286193	0.95968	0.832622	0.58144
DDX21	30	-0.0562232	-0.10576	-0.169348	0.33648	0.0480047	0.00300788	0.55511	0.449311	0.0660363
DDX23	24	0.0818293	0.0331852	0.076421	0.108096	0.69585	0.0702784	0.314316	0.901364	0.299053
DDX24	17	-0.262521	-0.115367	-0.200581	0.00743867	0.0684192	0.0066129	0.150726	0.482819	0.0959366
DDX27	23	0.0216062	0.0266528	-0.0107856	0.77643	0.635388	0.442178	0.876191	0.87547	0.717201
DDX28	2	-0.00535619	0.0508127	-0.00388602	0.573867	0.494971	0.815925	0.744106	0.809536	0.933707
DDX31	9	-0.27835	-0.0998541	-0.21172	0.0100145	0.44316	0.119975	0.15617	0.780747	0.383652
DDX39A	6	0.145833	0.120561	0.13651	0.029956	0.0715778	0.102685	0.206477	0.489608	0.357887
DDX39B	18	0.157724	0.060926	0.119193	0.0111721	0.105634	0.00465807	0.158549	0.53145	0.0792386
DDX3X	32	-0.0556892	-0.102086	-0.0683116	0.244398	0.0302319	0.15478	0.471656	0.425899	0.431213
DDX41	19	0.0679494	-0.039882	0.00630318	0.255723	0.249805	0.802878	0.481104	0.662653	0.929668
DDX42	24	0.12797	-0.0187802	0.00230156	0.0818322	0.42838	0.825326	0.279145	0.774928	0.936606
DDX43	3	0.0409295	0.0265375	0.00686354	0.435604	0.432668	0.569986	0.637683	0.776666	0.802452
DDX46	40	-0.0122467	-0.0046131	0.0896758	0.939504	0.932844	0.117545	0.969446	0.98646	0.379632
DDX47	5	-0.0068475	-0.0194102	-0.0285909	0.962253	0.81359	0.510686	0.981745	0.943629	0.766044
DDX49	2	-0.020526	-0.00113555	-0.12986	0.436927	0.655186	0.0265125	0.638892	0.881358	0.18641
DDX5	34	-0.231094	-0.23018	-0.185254	0.00250707	0.000452983	0.00193029	0.118382	0.0997339	0.0538837
DDX50	7	-4.11101e-05	0.0139341	-0.0208205	0.81145	0.690284	0.61783	0.89675	0.897502	0.830166
DDX51	9	0.0794413	-0.0956248	-0.0439921	0.195055	0.115085	0.325531	0.419858	0.540599	0.617998
DDX52	4	0.0518475	0.124853	-0.0327259	0.501117	0.497811	0.527481	0.690312	0.810508	0.776787
DDX54	15	0.00301639	-0.0150888	-0.116106	0.844625	0.917402	0.0774427	0.914844	0.982581	0.313103
DDX55	6	-0.066658	-0.0354892	-0.0423608	0.399028	0.521382	0.547517	0.608294	0.823145	0.788735
DDX56	9	-0.0975279	-0.128969	-0.210426	0.0690855	0.0669693	0.00026015	0.258936	0.479271	0.0199
DDX59	4	0.198097	0.126335	0.169699	0.041657	0.516339	0.0605326	0.223367	0.820469	0.277005
DDX6	15	-0.165849	-0.163183	-0.123795	0.016752	0.0366857	0.0272234	0.173429	0.429449	0.18781
DECR1	17	0.138098	0.0930982	0.172564	0.0122231	0.0455194	0.00234223	0.162097	0.44401	0.0572992
DECR2	5	0.30617	0.210698	0.205055	0.0378949	0.177313	0.134424	0.217078	0.605287	0.401553
DEF6	3	-0.195419	0.170458	-0.186943	0.322115	0.335848	0.126209	0.543463	0.717335	0.391444
DEGS1	1	0.331754	0.135558	-0.310616	0.127371	0.625491	0.0408499	0.336777	0.871773	0.228892
DEGS2	1	0.370948	0.132266	0.264383	0.0880954	0.651055	0.417662	0.286924	0.879564	0.700012
DEK	11	-0.0713292	-0.00345091	0.131182	0.652537	0.839845	0.0515005	0.794132	0.954436	0.258605
DENND10	2	-0.0793938	-0.0426525	0.0516215	0.264476	0.168292	0.897713	0.490505	0.595981	0.9641
DENND11	2	-0.138626	0.0544727	-0.0597693	0.633587	0.293286	0.431147	0.782689	0.688413	0.708299
DENND1A	2	0.0014183	-0.0324767	-0.0060709	0.87672	0.972728	0.883522	0.934025	0.995991	0.959744
DENND2D	2	-0.0875537	0.04428	0.0411331	0.241919	0.406796	0.277737	0.469472	0.765325	0.573126
DENND4A	3	0.118662	0.183902	0.213154	0.178255	0.0322189	0.00497548	0.400359	0.428432	0.0819252
DENND4B	2	0.0838008	-0.354531	-0.85045	0.874411	0.0992407	5.2546e-05	0.933516	0.52725	0.00928578
DENND4C	12	-0.0739604	0.105792	0.09021	0.152418	0.162587	0.0616054	0.371095	0.591749	0.278272
DENND6A	1	-0.28876	0.0165901	-0.0733034	0.25509	0.277143	0.934253	0.480532	0.679382	0.976524
DENR	6	-0.200204	-0.187996	-0.107309	0.135498	0.283859	0.630268	0.347238	0.682187	0.838978
DEPTOR	3	0.231824	0.360736	0.488409	0.00635875	0.000306445	3.29151e-05	0.148232	0.0843381	0.00764195
DERA	5	-0.0780139	-0.0629359	-0.141375	0.738757	0.512193	0.102344	0.852164	0.81724	0.357508
DERL1	5	0.251452	0.101445	-0.0476898	0.0609743	0.448727	0.188166	0.24761	0.783992	0.473391
DERL2	2	0.138909	-0.197675	-0.118978	0.257762	0.157125	0.146171	0.482919	0.582905	0.417648
DERPC	1	-0.205339	-0.211538	-0.275048	0.0121143	0.0293327	0.0131035	0.162097	0.419365	0.133214
DFFA	9	-0.0344845	-0.0810268	-0.169072	0.798331	0.263287	0.0518791	0.88811	0.672352	0.259093
DGAT1	1	0.252555	0.370941	0.233535	0.0102468	0.00495221	0.0141703	0.156211	0.300486	0.139015
DGCR2	1	0.147994	-0.0790263	-0.431128	0.735303	0.451884	0.10099	0.850277	0.785168	0.354395
DGCR6L	2	-0.25862	-0.216496	-0.407967	0.0574467	0.249892	0.000889685	0.243415	0.662653	0.0368429
DGCR8	3	0.192423	0.0628535	0.0878897	0.00634496	0.163392	0.0756013	0.148232	0.59219	0.308735
DGKA	5	-0.167334	0.0623289	0.0562421	0.0636817	0.348017	0.568657	0.252163	0.726977	0.802237
DGKE	2	-0.265417	-0.290657	-0.277431	0.0249286	0.0116968	0.0269735	0.195704	0.350127	0.186965
DGKH	3	-0.124153	0.085121	0.0395831	0.171798	0.315878	0.430482	0.391912	0.707192	0.707916
DGKZ	3	0.199183	0.13212	0.101152	0.134442	0.254731	0.363308	0.345744	0.666773	0.652326
DHCR24	6	0.142932	0.0622731	0.08103	0.0317965	0.167117	0.281796	0.21063	0.595318	0.576459
DHCR7	8	0.126431	0.0439241	0.131173	0.0595479	0.322232	0.011342	0.245345	0.711196	0.122754
DHDDS	1	-0.261727	-0.0686169	-0.0789768	0.0403896	0.276152	0.28275	0.222651	0.679382	0.57749
DHFR	10	-0.167569	-0.0531218	0.00149293	0.0851703	0.536943	0.44999	0.283062	0.83086	0.724179
DHODH	5	0.141813	0.024464	0.0990906	0.118373	0.454964	0.079614	0.326829	0.787953	0.317656
DHPS	11	-0.29751	-0.139701	-0.231869	0.000767031	0.00560449	0.00010104	0.0760825	0.302015	0.0132491
DHRS1	10	0.239658	0.0222353	0.0768488	0.0109739	0.857305	0.20586	0.157477	0.959986	0.494345
DHRS11	2	-0.620606	-0.400105	-0.190122	0.0330879	0.0618878	0.507527	0.212303	0.476736	0.763569
DHRS12	1	0.127059	0.471232	0.10068	0.279915	0.0311735	0.894613	0.504449	0.428071	0.96281
DHRS13	6	0.302687	0.0530407	0.00997099	0.0257775	0.822298	0.619884	0.197653	0.946387	0.83162
DHRS2	1	0.2227	0.0902578	0.194086	0.0142166	0.272481	0.00160182	0.169586	0.678226	0.0495728
DHRS4	10	0.0834577	0.0724483	0.0739667	0.0357859	0.1257	0.0504195	0.214947	0.552158	0.255445
DHRS7	9	-0.0898623	-0.067436	0.0156625	0.224288	0.393102	0.60949	0.450446	0.755611	0.825726
DHRS7B	5	-0.0083088	0.228141	0.106261	0.6815	0.000526484	0.238716	0.814081	0.106765	0.529726
DHRSX	1	-0.12265	-3.12512e-05	-0.102848	0.740918	0.601087	0.853044	0.853058	0.859525	0.947449
DHTKD1	16	0.103815	0.0672622	0.0586589	0.106259	0.273443	0.279243	0.311226	0.67885	0.573883
DHX15	24	0.00343208	0.0518316	0.0551135	0.721308	0.445373	0.299837	0.840146	0.78193	0.592918
DHX16	19	0.24568	0.0308379	-0.0809399	0.226093	0.928411	0.0849057	0.452303	0.985984	0.326326
DHX29	18	0.0327054	0.0436125	0.00205664	0.560288	0.363106	0.928098	0.735141	0.739046	0.974965
DHX30	29	0.0494383	0.0304849	-0.0102383	0.338068	0.535247	0.69265	0.556598	0.83075	0.873988
DHX32	3	0.040599	0.117535	0.0753543	0.991548	0.285932	0.195453	0.996343	0.683645	0.482445
DHX33	7	-0.0532354	-0.0108311	0.00603948	0.188064	0.286798	0.651825	0.411477	0.68382	0.850053
DHX34	6	0.0454498	-0.0300925	-0.0819258	0.791558	0.650957	0.174468	0.884949	0.879564	0.456365
DHX35	3	-0.0240341	0.0207728	-0.00179938	0.628834	0.633324	0.551814	0.78007	0.874246	0.791269
DHX36	22	-0.0324698	-0.15962	-0.191862	0.519312	0.0118587	0.000733477	0.704794	0.350127	0.0340818
DHX37	11	0.213556	0.121972	-0.00132899	0.0688367	0.457281	0.608575	0.258722	0.788854	0.825502
DHX38	13	0.125262	0.142732	0.127369	0.0122076	0.0254546	0.00679399	0.162097	0.407664	0.0970869
DHX40	9	0.0428672	0.0642451	0.13963	0.487041	0.217498	0.0156373	0.679576	0.64115	0.143624
DHX57	6	0.0073722	-0.0168399	-0.112525	0.778125	0.815957	0.0778478	0.876869	0.944799	0.313753
DHX8	17	-0.0365351	-0.00244655	0.00688605	0.990533	0.645343	0.505025	0.996091	0.87834	0.761666
DHX9	46	0.0607254	0.0193724	0.0200012	0.190293	0.641945	0.888282	0.413899	0.877564	0.962438
DIABLO	10	0.0361732	0.0231033	0.0897478	0.374762	0.992842	0.128488	0.588256	0.998838	0.394585
DIAPH1	46	-0.178224	-0.101636	0.0260827	0.027901	0.133117	0.877133	0.203755	0.554972	0.956329
DIAPH2	9	-0.220239	-0.0390996	0.0649998	0.0550138	0.374074	0.75396	0.239341	0.745221	0.90739
DIAPH3	3	0.0794151	-0.109396	0.124718	0.73578	0.135484	0.36803	0.850573	0.554972	0.656899
DICER1	16	-0.058073	-0.00968158	0.0115949	0.176083	0.940027	0.766552	0.397102	0.988072	0.913924
DIDO1	38	0.012467	0.000507002	0.021657	0.621118	0.791527	0.467172	0.776121	0.935888	0.735468
DIMT1	3	0.715671	0.222333	0.111349	0.0632579	0.440518	0.82321	0.25179	0.779658	0.93578
DIP2A	6	0.0578574	0.132649	0.176686	0.665509	0.0689522	0.0279867	0.803826	0.483564	0.190349
DIP2B	23	0.00569071	0.00242994	0.00334983	0.980903	0.990862	0.787365	0.990414	0.998838	0.923085
DIP2C	4	-0.160059	-0.09539	-0.0154896	0.0213382	0.127033	0.319144	0.18676	0.552158	0.612229
DIPK2A	5	0.14318	0.156954	0.0411987	0.0136879	0.0176006	0.244844	0.168227	0.388296	0.538359
DIS3	12	0.0721859	0.100842	0.109771	0.27526	0.0553206	0.0197526	0.4998	0.461864	0.161414
DIS3L	3	-0.175903	-0.0784287	-0.133136	0.0325913	0.439585	0.196738	0.211761	0.779465	0.483782
DIS3L2	6	0.0695816	0.011102	-0.0502224	0.559797	0.859087	0.288242	0.734815	0.960273	0.583025
DKC1	15	-0.0469537	0.0495948	-0.00879331	0.421949	0.638689	0.940324	0.626742	0.876757	0.978811
DKK1	1	0.288236	0.0438405	-0.133207	0.141543	0.893448	0.404749	0.356449	0.972029	0.690551
DLAT	13	0.171508	0.082971	0.0673443	0.0190581	0.507365	0.277195	0.180847	0.813855	0.572518
DLC1	1	-0.0189538	0.0836781	0.0954699	0.334034	0.519643	0.844562	0.552658	0.82184	0.943627
DLD	14	0.15175	0.0889282	0.107065	0.00644603	0.0779679	0.0317219	0.148278	0.498219	0.200942
DLG1	20	0.211489	0.0573528	-0.0555195	0.0619578	0.958726	0.210732	0.249362	0.993986	0.500223
DLG3	8	0.260294	0.098848	0.029526	0.0637834	0.738271	0.859733	0.252163	0.91841	0.95069
DLG5	19	0.0404099	-0.00057604	-0.0724012	0.843442	0.776241	0.158684	0.914015	0.932191	0.436878
DLGAP4	7	0.0615803	0.0563201	7.21113e-05	0.425057	0.352577	0.775622	0.628935	0.730168	0.917976
DLGAP5	9	-0.157893	-0.204482	-0.173982	0.023323	0.00826803	0.00363819	0.189799	0.333578	0.0702654
DLST	14	-0.0523451	-0.0516202	0.0231484	0.857012	0.242152	0.951489	0.923231	0.658674	0.982899
DMAC2	1	0.355116	-0.317846	-0.400284	0.173682	0.0396033	0.0130369	0.394225	0.431686	0.132711
DMAC2L	3	-0.0641409	0.0129398	0.0359767	0.561975	0.977503	0.476196	0.735358	0.99704	0.741776
DMAP1	11	-0.0027414	-0.0469614	-0.0586558	0.848577	0.383932	0.42146	0.916779	0.750076	0.701766
DMTN	1	0.281429	0.158778	-0.146393	0.0345969	0.161518	0.414731	0.213283	0.589906	0.698408
DMXL1	3	0.500213	0.0930347	0.177263	0.0215873	0.307349	0.334017	0.186959	0.701559	0.624892
DMXL2	7	-0.142747	-0.00898494	-0.0846305	0.00363639	0.487641	0.390711	0.13182	0.806822	0.677808
DNA2	1	-0.197346	-0.116201	-0.231786	0.0433438	0.118329	0.0123054	0.225207	0.5442	0.128664
DNAAF10	2	0.0899782	0.109975	0.0138542	0.392268	0.428312	0.464885	0.601448	0.774928	0.734964
DNAAF5	10	0.0758598	0.0783441	0.0386421	0.499992	0.324578	0.739277	0.689255	0.712053	0.900281
DNAH11	1	-0.238345	0.248123	0.225369	0.165157	0.134347	0.129234	0.384221	0.554972	0.395033
DNAJA1	16	-0.332289	-0.268529	-0.247427	0.000248568	0.000421902	0.000234904	0.0481318	0.0956228	0.018808
DNAJA2	14	0.0256513	0.0479666	0.148929	0.554182	0.330273	0.0112124	0.732006	0.712981	0.122384
DNAJA3	12	0.199268	0.0753323	0.0700133	0.0354541	0.429647	0.521484	0.214947	0.774928	0.772713
DNAJA4	7	-0.0833305	-0.00583803	0.128201	0.10881	0.692432	0.107267	0.314394	0.898448	0.364399
DNAJB1	20	-0.324162	-0.249797	-0.178437	0.00837356	0.0363034	0.0882877	0.153964	0.429449	0.331751
DNAJB11	13	-0.129843	-0.0136031	0.0172854	0.845501	0.717634	0.216337	0.915475	0.908572	0.505486
DNAJB12	9	0.276451	0.0280623	-0.022891	0.0240458	0.882474	0.862203	0.192018	0.968295	0.951679
DNAJB14	2	-0.0771666	-0.0128155	-0.072872	0.489337	0.443778	0.928181	0.681073	0.781122	0.974965
DNAJB2	5	-0.689919	-0.705269	-0.559027	0.00952385	0.0105755	0.0133014	0.155137	0.344213	0.134445
DNAJB6	7	-0.0435285	0.0176173	0.0113478	0.372976	0.982214	0.659629	0.587479	0.997281	0.855249
DNAJB9	3	-0.299855	-0.0294003	0.18469	0.166997	0.921739	0.282464	0.38587	0.983588	0.577366
DNAJC1	14	0.0387898	0.00871544	0.0152975	0.237815	0.587944	0.339271	0.464302	0.855646	0.630437
DNAJC10	12	0.110157	0.0481733	0.103309	0.0643526	0.274413	0.0294939	0.25338	0.679285	0.194166
DNAJC11	12	0.194619	0.131226	0.10594	0.0213663	0.032674	0.0702845	0.18676	0.428432	0.299053
DNAJC12	1	0.237774	0.194182	0.135304	0.320187	0.336047	0.80659	0.541089	0.717335	0.930057
DNAJC13	28	0.131266	0.109757	0.101157	0.0447165	0.0427358	0.0385983	0.225724	0.441106	0.222301
DNAJC15	5	0.0484946	-0.0647422	-0.0580972	0.688655	0.207106	0.0983248	0.818568	0.633083	0.349811
DNAJC16	1	0.198622	0.0677138	-0.165416	0.112732	0.672423	0.415217	0.318599	0.888867	0.69877
DNAJC17	6	-0.0314972	-0.0827191	-0.113205	0.451283	0.183376	0.182272	0.648559	0.612259	0.466808
DNAJC19	6	0.115907	0.105222	0.124328	0.0820121	0.0794007	0.0129369	0.279145	0.498219	0.132217
DNAJC2	13	-0.0739517	-0.0751181	-0.0308122	0.0548814	0.0522715	0.203899	0.238935	0.457212	0.491919
DNAJC21	5	-0.103868	-0.218434	-0.146581	0.314957	0.258559	0.0257455	0.536367	0.669059	0.184207
DNAJC24	1	-0.342484	-0.12691	-0.189646	0.00346533	0.0609599	0.0317662	0.131558	0.473843	0.200966
DNAJC25	4	-0.201172	-0.112785	-0.104164	0.437467	0.695201	0.833504	0.639251	0.900827	0.938895
DNAJC3	18	0.128952	0.10564	0.166655	0.0339268	0.135224	0.00401868	0.212761	0.554972	0.0730558
DNAJC4	1	0.246589	0.269042	-0.00972769	0.77437	0.361507	0.671842	0.87497	0.737954	0.862067
DNAJC5	2	1.22305	0.904239	0.792326	0.000193423	0.204799	0.000268958	0.0425863	0.63137	0.019914
DNAJC7	21	-0.00876158	-0.0540367	-0.135792	0.422444	0.187784	0.0587394	0.627092	0.613848	0.273404
DNAJC8	10	-0.0421784	-0.053243	0.0129797	0.216133	0.150584	0.675354	0.441666	0.577028	0.863279
DNAJC9	13	-0.124209	-0.224261	-0.190924	0.460991	0.10386	0.173461	0.656669	0.528292	0.454658
DNAL1	1	-0.122047	-0.159483	-0.110617	0.13585	0.0597108	0.0864695	0.34768	0.472603	0.329542
DNAL4	1	-0.300099	0.297613	0.111938	0.0335171	0.0407987	0.262863	0.212761	0.435562	0.558484
DNASE1L1	2	-0.164236	0.242425	-0.031564	0.0723777	0.438108	0.273775	0.265447	0.778798	0.569423
DNASE2	6	0.369343	0.177358	0.109436	0.0105346	0.148421	0.420636	0.156339	0.574569	0.70115
DNHD1	1	0.0516856	-0.0936539	-0.147535	0.667644	0.209577	0.265437	0.804953	0.634114	0.56073
DNLZ	3	-0.110992	-0.142378	-0.195657	0.265286	0.0520355	0.0587942	0.491154	0.457212	0.273416
DNM1	2	0.0864924	0.231974	0.114982	0.319387	0.0754542	0.496699	0.540361	0.495388	0.755837
DNM1L	26	-0.000232939	0.0409892	0.0372539	0.812342	0.404068	0.186957	0.897076	0.762803	0.47184
DNM2	32	-0.0156424	-0.0207754	0.0211298	0.504498	0.487682	0.46637	0.692612	0.806822	0.735406
DNMBP	9	-0.00906277	-0.0483156	-0.0566248	0.429532	0.184545	0.159787	0.632709	0.61324	0.438277
DNMT1	41	-0.155913	-0.068905	-0.090902	0.0202466	0.328627	0.148732	0.185518	0.712981	0.42168
DNMT3A	5	-0.209543	-0.0900692	-0.0139286	0.0831479	0.61259	0.652532	0.281025	0.865374	0.850313
DNMT3B	1	0.186775	0.413391	-0.0641782	0.222517	0.00152405	0.493864	0.448643	0.19244	0.754541
DNPEP	14	0.0278283	0.00560353	-0.000850995	0.887945	0.667104	0.57296	0.939961	0.886634	0.804085
DNPH1	6	-0.0283538	-0.154989	0.0142075	0.304299	0.0453772	0.559237	0.525346	0.44401	0.796788
DNTTIP1	11	0.0247667	0.0280912	0.0584066	0.4856	0.899764	0.250846	0.678397	0.974607	0.543746
DNTTIP2	20	-0.0195198	0.0370099	0.00473501	0.803584	0.56	0.917635	0.892537	0.843954	0.971736
DOCK1	3	0.265731	0.17506	0.144705	0.0489758	0.124935	0.173405	0.232128	0.552084	0.454658
DOCK10	3	-0.185382	-0.132423	-0.133496	0.0625607	0.530177	0.484802	0.250308	0.828711	0.747705
DOCK5	14	-0.0873007	0.0319015	0.0865549	0.299506	0.281587	0.0897971	0.520874	0.682045	0.335051
DOCK6	22	0.12009	0.113209	0.0463187	0.0362432	0.0407415	0.240898	0.215023	0.435562	0.532427
DOCK7	24	-0.0378105	-0.0368743	-0.0168446	0.562527	0.481517	0.651656	0.735715	0.801969	0.850053
DOCK8	9	0.150241	0.0143551	-0.0361566	0.106791	0.632932	0.751678	0.312191	0.874238	0.905351
DOCK9	3	-0.262515	-0.0217346	-0.042989	0.131142	0.869087	0.997767	0.341433	0.963329	0.999366
DOHH	4	0.110723	-0.00348928	-0.114548	0.658368	0.714236	0.17884	0.799209	0.908306	0.463609
DOK7	1	0.0544891	0.0522783	0.166773	0.953916	0.993897	0.651191	0.977496	0.999402	0.850053
DOLK	2	0.0978352	0.0818921	0.145235	0.109698	0.520975	0.078207	0.315541	0.822671	0.314707
DOLPP1	2	-0.582515	-0.464165	-0.383548	0.0295398	0.162893	0.0428973	0.20619	0.591749	0.234928
DOP1B	6	-0.00342165	-0.0108385	-0.0533072	0.431615	0.743503	0.323193	0.634487	0.919647	0.616104
DOT1L	2	0.201728	-0.130067	-0.252208	0.162724	0.450592	0.0182074	0.382301	0.784608	0.15607
DPAGT1	2	0.146092	0.182635	0.117027	0.215758	0.0637685	0.302296	0.441017	0.478016	0.595474
DPCD	2	-0.0343482	0.118838	0.125618	0.288406	0.210802	0.140129	0.511498	0.635473	0.408719
DPF1	1	0.1059	0.0147348	-0.337537	0.828536	0.890519	0.00739385	0.905759	0.97104	0.100844
DPF2	8	-0.0152117	-0.117366	-0.0642018	0.970596	0.0800904	0.131274	0.98593	0.498219	0.396955
DPH1	1	0.0353328	0.780879	0.0393338	0.938614	0.0491528	0.934206	0.969248	0.450791	0.976524
DPH2	2	0.20413	0.0824989	0.228665	0.761362	0.760642	0.530565	0.867009	0.927141	0.778627
DPH5	2	0.0851434	-0.0955648	0.0357301	0.710071	0.367752	0.959274	0.832341	0.741825	0.985969
DPH6	3	-0.270033	-0.130046	0.0302469	0.00103939	0.168885	0.648506	0.0881921	0.597253	0.848741
DPM1	7	0.0320207	0.0158257	0.0869515	0.543046	0.780199	0.176838	0.723624	0.933428	0.46064
DPM3	2	0.337306	0.249021	0.188315	0.016302	0.220085	0.0408535	0.172773	0.644397	0.228892
DPP3	25	0.250937	0.128455	0.0553341	0.0908054	0.375921	0.687308	0.28975	0.745981	0.870974
DPP7	12	0.391112	0.0602211	0.0434597	0.0536676	0.787088	0.959262	0.237553	0.934694	0.985969
DPP8	2	-0.374773	-0.0192344	-0.099724	0.0502736	0.826378	0.282991	0.233616	0.949184	0.577829
DPP9	6	-0.0183787	-0.0389043	-0.00991227	0.516277	0.62345	0.834039	0.702253	0.870106	0.93907
DPY19L3	2	-0.000522489	0.0925304	0.102614	0.917466	0.174154	0.0812361	0.95968	0.601539	0.319921
DPY19L4	5	0.000815627	-0.00488003	-0.174344	0.923356	0.559526	0.0171103	0.962448	0.843796	0.151033
DPY30	3	0.160584	0.14111	0.131422	0.488768	0.467531	0.532191	0.680724	0.795784	0.779669
DPYD	2	0.322841	0.299921	0.245144	0.0945379	0.105957	0.196113	0.294702	0.53145	0.483281
DPYSL2	24	0.176497	0.133834	0.126056	0.152199	0.364421	0.316967	0.370961	0.739256	0.609242
DPYSL4	1	0.471414	0.271944	0.00352612	0.132867	0.477447	0.403915	0.343698	0.800873	0.689996
DR1	1	-0.0296092	0.0286838	0.0437023	0.804309	0.965838	0.602715	0.89291	0.995118	0.822393
DRAP1	5	-0.246331	-0.120397	-0.174984	0.00142894	0.116981	0.00602082	0.0989633	0.54229	0.0906181
DRG1	6	-0.142676	-0.0207668	-0.0010623	0.0520598	0.611225	0.490856	0.236432	0.8646	0.752145
DRG2	6	-0.0133609	0.0158319	-0.0307303	0.809536	0.833735	0.483306	0.895536	0.951394	0.746987
DROSHA	2	-0.0404347	-0.157406	0.0257027	0.437948	0.134568	0.631498	0.639251	0.554972	0.839685
DSCC1	3	-0.150905	-0.154486	0.0657102	0.165811	0.211581	0.330761	0.38443	0.636145	0.621931
DSG2	13	0.16166	0.0134541	0.00773103	0.140694	0.690404	0.460732	0.355239	0.897502	0.732116
DSN1	6	0.251835	0.204828	0.324678	0.000191174	0.00156268	2.38684e-05	0.0425863	0.19244	0.00641716
DSP	143	-0.0944585	-0.0711183	-0.0639917	0.0306112	0.0863898	0.106005	0.208304	0.507785	0.362285
DSPP	1	0.033539	0.100509	0.0501243	0.244275	0.175406	0.213977	0.471656	0.603978	0.503211
DST	40	-0.111701	-0.0186409	-0.0268094	0.0344103	0.468078	0.388581	0.212805	0.795784	0.675459
DSTN	13	-0.0711613	-0.0688343	0.0304382	0.12713	0.145163	0.876993	0.336549	0.568407	0.956329
DSTYK	2	-0.272146	-0.294377	0.0312267	0.331401	0.483509	0.580046	0.550264	0.803087	0.808727
DTD1	7	0.0679163	0.145904	0.218802	0.301765	0.00697929	0.000654334	0.522679	0.318093	0.0315144
DTD2	2	0.131306	-0.0447038	-0.0724006	0.257978	0.976906	0.222311	0.482988	0.99704	0.512524
DTNA	9	0.0191923	-0.00488378	0.0284533	0.583599	0.971992	0.64471	0.751043	0.99589	0.847125
DTNB	2	-0.0119995	0.123587	-0.0206688	0.792982	0.205254	0.789564	0.885482	0.631916	0.924397
DTNBP1	5	-0.261944	-0.066776	-0.0631475	0.0208394	0.798792	0.689226	0.186298	0.93848	0.871828
DTWD2	1	-0.269457	-0.186322	-0.165678	0.0188506	0.0787064	0.127316	0.180675	0.498219	0.392966
DTX2	1	0.558249	0.217885	-0.0260316	0.0344016	0.824154	0.818982	0.212805	0.947335	0.93511
DTX3L	3	-0.0914302	0.197322	0.0145905	0.0939815	0.0596763	0.905906	0.293858	0.472603	0.967346
DTYMK	16	0.0409829	0.0200004	-0.0139343	0.427675	0.863504	0.471257	0.631861	0.961893	0.737701
DUS1L	7	-0.184059	0.00490781	-0.0196622	0.034022	0.460287	0.827835	0.212761	0.790889	0.93674
DUS2	6	0.24368	0.152424	-0.0246827	0.474079	0.550594	0.461297	0.669214	0.83752	0.732116
DUS3L	6	-0.0935673	-0.13334	-0.0765334	0.0926221	0.0216311	0.0513767	0.2919	0.396569	0.258543
DUSP12	4	0.0258947	0.142517	0.0551001	0.857895	0.0360913	0.266614	0.923573	0.429449	0.561626
DUSP14	1	-0.0754665	-0.0347102	-0.125148	0.95433	0.573404	0.550683	0.977544	0.849607	0.791042
DUSP15	1	0.00134618	-0.143282	-0.111389	0.57036	0.257884	0.971116	0.742067	0.667637	0.990891
DUSP23	7	0.191967	0.023666	-0.130533	0.340879	0.471348	0.0306936	0.558897	0.797061	0.197268
DUSP28	1	0.277811	0.271449	0.310184	0.252779	0.0187611	0.01889	0.478603	0.38926	0.158099
DUSP3	5	-0.0752189	-0.0703517	-0.175557	0.0657985	0.144159	0.00415298	0.254172	0.565925	0.0740806
DUT	10	0.0339541	-0.0177226	0.050124	0.476472	0.792618	0.220454	0.671119	0.936075	0.509851
DVL2	4	-0.0548769	-0.117864	-0.15752	0.377081	0.173978	0.0578172	0.589289	0.601201	0.27134
DVL3	3	-0.136444	-0.0997723	-0.153295	0.0227062	0.106415	0.0314996	0.188347	0.53145	0.200442
DXO	3	0.0295475	-0.21291	0.0429916	0.93503	0.0873929	0.886139	0.967004	0.509032	0.961117
DYM	4	0.0231172	0.0753421	0.00802196	0.522116	0.210575	0.654875	0.706856	0.635352	0.85158
DYNC1H1	178	-0.066141	-0.02515	0.0327899	0.118243	0.647566	0.375873	0.326822	0.87834	0.664523
DYNC1I2	18	-0.115134	-0.112034	0.0533747	0.072237	0.126011	0.466381	0.265447	0.552158	0.735406
DYNC1LI1	14	-0.145371	-0.0400008	0.0297235	0.0525622	0.46973	0.29083	0.236665	0.795784	0.583923
DYNC1LI2	11	-0.000374905	-0.0304122	0.05151	0.591598	0.680504	0.0810942	0.75722	0.892712	0.319793
DYNC2I2	2	-0.147938	-0.113055	-0.230374	0.393007	0.136527	0.00145352	0.602209	0.55577	0.0466701
DYNLL1	5	-0.221787	-0.282952	-0.267341	0.100471	0.0692147	0.0550899	0.303858	0.483564	0.264995
DYNLL2	4	-0.146229	-0.199366	-0.281972	0.167522	0.226062	0.0221499	0.386389	0.647943	0.170388
DYNLRB1	3	0.12429	-0.0387893	-0.168264	0.322219	0.710314	0.130662	0.543463	0.90729	0.396031
DYNLT1	2	-0.102806	-0.0115956	-0.0131148	0.130471	0.50071	0.409534	0.340702	0.811635	0.693841
DYNLT3	1	-0.202212	-0.0269204	-0.00972237	0.26978	0.742579	0.842687	0.49501	0.919647	0.942693
DYRK1A	8	0.180198	0.151023	0.0805089	0.0113689	0.0167638	0.0452545	0.159869	0.384471	0.241918
DYRK1B	1	0.186899	0.110283	0.0784026	0.61672	0.372724	0.464736	0.772263	0.744607	0.734964
E2F1	1	0.0736204	-0.225146	-0.000563116	0.291093	0.605226	0.880079	0.514129	0.861461	0.958165
E2F4	3	-0.291982	-0.213158	-0.122895	0.0162642	0.0200607	0.12533	0.172773	0.392825	0.390534
E4F1	3	-0.0808007	-0.136563	-0.0475034	0.116362	0.0343098	0.284141	0.324064	0.429449	0.57895
EAF1	1	-0.302742	0.0811489	-0.100985	0.010681	0.235014	0.294075	0.156479	0.65262	0.586172
EAF2	1	-0.101083	-0.170256	-0.205584	0.0584227	0.165841	0.0191254	0.244411	0.595195	0.158644
EAPP	3	0.381003	0.162253	0.187129	0.0256493	0.123402	0.0215842	0.197653	0.549993	0.169015
EARS2	12	0.23652	0.184933	0.163327	0.0183418	0.0722754	0.0597851	0.177789	0.490672	0.275425
EBAG9	4	0.204103	0.130254	0.289851	0.404648	0.669458	0.105126	0.613086	0.887619	0.361016
EBNA1BP2	10	-0.00366532	-0.0982033	-0.0331187	0.896187	0.139628	0.823768	0.94577	0.562151	0.93578
EBP	2	0.322155	0.137764	-0.0159913	0.0331763	0.171782	0.777297	0.212376	0.60007	0.918711
ECD	4	-0.24092	-0.338197	-0.341919	0.00337476	0.00190701	0.00278253	0.13003	0.212102	0.0630653
ECE1	16	0.210895	0.018477	-0.0203865	0.0285179	0.928674	0.650168	0.204427	0.985997	0.849618
ECH1	13	0.131853	0.0733952	0.103297	0.025037	0.100537	0.060606	0.195873	0.528292	0.277005
ECHDC1	5	-0.073358	0.0893443	0.0730172	0.906921	0.179983	0.132784	0.952685	0.607246	0.398921
ECHS1	16	0.150324	0.0233813	0.0368697	0.236398	0.67596	0.78174	0.463127	0.89057	0.92013
ECI1	8	0.0873543	0.0685685	0.143383	0.163178	0.229672	0.0134284	0.382344	0.64974	0.134738
ECI2	5	-0.056251	0.0786097	0.0943558	0.609148	0.516361	0.136284	0.768782	0.820469	0.403834
ECPAS	41	-0.106179	-0.0175866	0.00899042	0.0247733	0.664898	0.80791	0.195397	0.886059	0.930328
ECSIT	13	0.0869518	-0.0756059	-0.0796567	0.123488	0.209457	0.209058	0.331451	0.634114	0.49907
ECT2	7	-0.180168	-0.0124187	0.00434574	0.182999	0.662844	0.608698	0.406032	0.884971	0.825524
EDC3	12	-0.0169766	-0.178933	-0.196883	0.493118	0.0164356	0.00251021	0.684308	0.378067	0.0589747
EDC4	30	0.0755997	0.0153928	-0.0242084	0.20031	0.799563	0.634904	0.423482	0.938566	0.842095
EDEM2	3	0.0246589	0.0488303	0.102181	0.73184	0.803123	0.278572	0.847672	0.939985	0.573327
EDEM3	8	0.0441577	-0.0431326	0.141675	0.620762	0.470253	0.005751	0.775802	0.795946	0.0879309
EDF1	9	-0.224862	-0.0366469	-0.123956	0.00871245	0.412825	0.0376449	0.153964	0.770685	0.220267
EDRF1	5	-0.231266	-0.234805	-0.286105	0.00431199	0.0112546	0.000749289	0.135134	0.348304	0.034575
EEA1	67	-0.12746	-0.0472509	-0.0110178	0.429414	0.602226	0.985924	0.632709	0.859718	0.994846
EED	1	-0.347649	0.136862	0.0472027	0.0727959	0.622893	0.684811	0.265547	0.869883	0.869467
EEF1A1	33	-0.284443	-0.126882	-0.101732	0.0170299	0.110844	0.207533	0.174555	0.536516	0.496681
EEF1A2	10	-0.353354	-0.288964	-0.280239	0.0194374	0.0383417	0.121764	0.181274	0.429449	0.386616
EEF1AKMT1	1	-0.351232	-0.242572	-0.0110763	0.0787193	0.249603	0.980084	0.275198	0.662653	0.99346
EEF1AKMT4	2	-0.225919	-0.192265	-0.124806	0.0129214	0.0241085	0.293638	0.165443	0.402811	0.585691
EEF1B2	9	-0.0960727	-0.13799	-0.0554895	0.0577215	0.0133225	0.198773	0.243836	0.356507	0.486276
EEF1D	13	-0.154374	-0.184578	-0.150239	0.0139767	0.00407802	0.00143868	0.168692	0.267318	0.0463868
EEF1E1	9	-0.0538481	0.0786351	0.100415	0.568835	0.170485	0.030159	0.740822	0.598522	0.195573
EEF1G	23	-0.114727	-0.0921158	0.0381882	0.0305171	0.0764991	0.502736	0.20821	0.498219	0.759945
EEF2	49	-0.194787	-0.180037	-0.135165	0.00769032	0.0135694	0.0293452	0.152481	0.357585	0.194153
EEF2K	3	0.177512	0.0856158	0.114808	0.111597	0.346771	0.273369	0.317536	0.725938	0.5694
EEFSEC	8	-0.142254	0.0521173	0.0894699	0.267919	0.399885	0.0921451	0.494157	0.76162	0.340235
EEPD1	2	0.0845167	0.0106814	0.0668225	0.260764	0.891254	0.692835	0.486314	0.971369	0.873988
EFCAB14	1	0.220907	0.210713	0.181234	0.131434	0.148434	0.18032	0.341712	0.574569	0.464732
EFHD1	10	-0.223914	-0.158711	-0.0733376	0.127086	0.275477	0.639309	0.336549	0.679382	0.843963
EFHD2	8	-0.186162	-0.0617733	-0.0405331	0.0255061	0.270992	0.59108	0.197339	0.678226	0.815876
EFL1	17	-0.07631	0.132835	0.0727334	0.137916	0.0308888	0.186126	0.351334	0.428071	0.471805
EFNA1	1	0.511985	0.488189	0.483728	1.45619e-05	0.000165858	3.57008e-05	0.0112214	0.0687294	0.00764195
EFNB2	1	-0.0592417	0.022439	-0.0956598	0.587612	0.784714	0.387669	0.754564	0.934622	0.674667
EFR3A	7	0.0964173	0.127374	0.0816587	0.0768355	0.0436622	0.127394	0.272654	0.443639	0.392995
EFR3B	4	-0.0730247	-0.261324	-0.445822	0.404967	0.0235683	0.000230585	0.61334	0.402811	0.018808
EFTUD2	44	0.0324253	0.0565532	0.071947	0.616328	0.244014	0.0829764	0.772091	0.660939	0.322937
EGFL7	1	-0.00509666	-0.255303	-0.357758	0.809438	0.00557977	0.000942348	0.895536	0.302015	0.0372429
EGLN1	6	0.502056	0.422382	0.202554	0.230762	0.36706	0.617466	0.456899	0.741043	0.82998
EHBP1	2	-0.303325	-0.16533	-0.210785	0.06336	0.124086	0.00916329	0.251965	0.550809	0.111026
EHBP1L1	13	0.121633	0.0172135	-0.115183	0.205239	0.280096	0.294281	0.428842	0.680831	0.58628
EHD1	20	-0.113695	-0.0457913	-0.00748522	0.0340143	0.33273	0.916199	0.212761	0.714012	0.971369
EHD4	20	-0.010137	0.0736283	0.104072	0.912273	0.236866	0.0269275	0.956459	0.653524	0.186965
EHHADH	4	0.213463	0.117889	-0.0241747	0.0191653	0.0373553	0.89408	0.180847	0.429449	0.96281
EHMT1	24	-0.00789163	0.0346762	0.0413307	0.893433	0.456803	0.179652	0.94351	0.788382	0.463609
EHMT2	20	0.0321343	-0.0593582	-0.0265742	0.236133	0.713168	0.848027	0.462963	0.907875	0.945202
EI24	1	-0.151215	0.114297	-0.184496	0.383341	0.139626	0.451647	0.594611	0.562151	0.725535
EID2	1	-0.258999	-0.225247	-0.279806	0.0098978	0.00636717	0.00181056	0.15617	0.312547	0.052285
EIF1AD	5	-0.295002	-0.268655	-0.326347	9.24848e-05	0.00763567	1.08726e-05	0.0287331	0.323419	0.00430475
EIF1AX	7	0.0225963	0.060142	0.113053	0.867879	0.253337	0.00872423	0.930143	0.666168	0.108593
EIF1B	5	-0.384054	-0.222022	-0.139452	0.000303703	0.0195629	0.0473725	0.0481318	0.390799	0.246991
EIF2A	18	-0.150993	-0.0863661	-0.0383331	0.0106512	0.0548883	0.266208	0.156339	0.461864	0.561412
EIF2AK2	12	-0.0957197	0.0591473	0.0675422	0.0943112	0.462542	0.489282	0.294355	0.793312	0.751377
EIF2AK3	5	-0.0741955	-0.077073	-0.113121	0.367555	0.476872	0.168585	0.583274	0.800581	0.448281
EIF2AK4	5	0.0136324	0.0565334	0.0317609	0.681989	0.474825	0.304177	0.814539	0.799606	0.59765
EIF2B1	7	-0.108706	0.00151023	0.0194108	0.113096	0.930287	0.414117	0.319237	0.986077	0.697679
EIF2B2	10	0.129875	0.119873	0.0610942	0.492441	0.75222	0.923574	0.683615	0.923321	0.973606
EIF2B3	8	-0.0413019	0.0583824	0.137346	0.972876	0.253379	0.00733993	0.986647	0.666168	0.100603
EIF2B4	10	0.00204357	-0.0752073	0.0364694	0.515675	0.416357	0.970647	0.70196	0.772701	0.990891
EIF2B5	5	-0.143106	0.0576571	0.0157901	0.20155	0.828261	0.737748	0.424936	0.950213	0.899871
EIF2D	9	0.151371	0.222524	0.255482	0.0694388	0.0121536	0.00332039	0.259503	0.350771	0.0679576
EIF2S1	18	-0.104482	-0.0477042	-0.0544107	0.0540892	0.278561	0.131305	0.238074	0.680088	0.396955
EIF2S2	12	-0.233162	-0.132499	0.039601	0.168986	0.600463	0.419528	0.388718	0.85943	0.700668
EIF2S3	15	-0.0881891	-0.146744	-0.0535718	0.115918	0.0677058	0.411353	0.324064	0.480867	0.695151
EIF3A	69	-0.168082	-0.110785	-0.11869	0.00248764	0.0241555	0.018924	0.118382	0.402811	0.158099
EIF3B	27	-0.0484949	-0.0409141	-0.0593937	0.350296	0.296744	0.145877	0.568051	0.6916	0.417434
EIF3C	29	-0.0128563	-0.0306115	-0.0963993	0.533851	0.419688	0.059968	0.715827	0.773528	0.275724
EIF3D	16	-0.128108	-0.0341351	-0.0343893	0.0490933	0.218572	0.356017	0.232128	0.642232	0.644576
EIF3E	14	-0.170533	0.0126399	0.00548891	0.020747	0.930965	0.797114	0.186202	0.986077	0.926759
EIF3F	9	0.0594462	0.0380151	-0.0543729	0.612413	0.909805	0.176879	0.770071	0.979171	0.46064
EIF3G	12	-0.0831618	-0.0212525	0.0638399	0.0905589	0.637375	0.0966002	0.28975	0.876443	0.347603
EIF3H	14	-0.0755921	0.052309	0.0141266	0.133925	0.857676	0.967674	0.345045	0.959986	0.989958
EIF3I	14	-0.282067	-0.0987521	-0.138131	0.0488573	0.515093	0.465406	0.232128	0.819765	0.735073
EIF3J	10	-0.31461	-0.205602	-0.034992	0.0899941	0.24531	0.778375	0.289488	0.661221	0.918745
EIF3K	7	-0.145947	-0.0792292	-0.164183	0.107893	0.256973	0.0245314	0.314218	0.666773	0.179999
EIF3L	17	-0.106101	0.024489	0.0258395	0.0467432	0.726377	0.903495	0.228991	0.913231	0.966185
EIF3M	8	-0.0902591	-0.0267653	0.0981122	0.223635	0.936361	0.313602	0.449721	0.987762	0.606277
EIF4A1	26	-0.107972	-0.110113	-0.128183	0.0166609	0.0324408	0.00350413	0.172798	0.428432	0.0694483
EIF4A2	7	-0.101647	0.012139	-0.0929153	0.0876019	0.594382	0.0667275	0.286234	0.857254	0.291971
EIF4A3	19	0.0168348	0.0244756	0.0373332	0.821109	0.813445	0.462458	0.901802	0.94362	0.73282
EIF4B	33	-0.203161	-0.253592	-0.22037	0.00417645	0.00979982	0.000809576	0.135134	0.344213	0.035231
EIF4E	5	-0.151201	-0.161087	-0.119581	0.00863259	0.0110763	0.00698526	0.153964	0.346726	0.098227
EIF4E2	2	-0.23663	-0.143939	-0.0362511	0.217511	0.461573	0.541613	0.443658	0.792002	0.785854
EIF4E3	1	0.657663	0.654694	0.406793	0.0435012	0.172132	0.149775	0.225207	0.600474	0.422772
EIF4EBP1	3	-0.28704	-0.16726	0.0703502	0.378552	0.559093	0.60429	0.590153	0.843796	0.822405
EIF4EBP2	3	0.037467	0.0969994	0.150978	0.888121	0.480198	0.112645	0.939961	0.801969	0.373109
EIF4ENIF1	9	-0.12719	-0.149959	-0.0672602	0.0436322	0.0175651	0.21472	0.225207	0.388296	0.504154
EIF4G1	44	-0.122938	-0.0925111	-0.0662759	0.0103617	0.0347807	0.0423788	0.156211	0.429449	0.233731
EIF4G2	21	-0.0865523	-0.00875091	-0.0249938	0.0299429	0.45584	0.299141	0.206477	0.788028	0.59244
EIF4G3	26	-0.0769628	-0.0412354	-0.022993	0.0441268	0.335994	0.364836	0.225724	0.717335	0.653711
EIF4H	11	-0.208678	-0.154486	-0.0832423	0.0524164	0.0700188	0.191336	0.236488	0.48522	0.477216
EIF5	21	-0.161648	-0.108875	-0.129974	0.00470618	0.0179384	0.00688221	0.138949	0.388296	0.0974896
EIF5A	15	-0.170659	-0.0151491	0.0278448	0.110185	0.886924	0.505443	0.315761	0.969172	0.762071
EIF5B	30	-0.158815	-0.0891591	-0.0468085	0.00934191	0.0494886	0.266372	0.155137	0.45083	0.561451
EIF6	8	-0.0608162	-0.0648564	0.0771331	0.401324	0.578703	0.133456	0.610704	0.852294	0.39985
EIPR1	9	-0.0363775	0.024715	0.0523343	0.306084	0.890991	0.605134	0.527433	0.97128	0.823008
ELAC2	21	-0.0149704	-0.017155	-0.0289116	0.780323	0.460514	0.406772	0.878091	0.790889	0.691961
ELAPOR1	11	0.225654	0.133064	0.172324	0.013629	0.0663079	0.0427386	0.167772	0.479266	0.234575
ELAPOR2	1	0.0725769	0.0648942	0.175134	0.389733	0.340252	0.0572642	0.600057	0.721295	0.27006
ELAVL1	12	-0.0406316	-0.0561998	0.0205071	0.634094	0.641157	0.351616	0.782689	0.877421	0.641641
ELF1	5	0.100709	0.0858946	0.132767	0.160421	0.08482	0.00873237	0.37932	0.505486	0.108593
ELF2	4	-0.0642286	0.0513751	0.125184	0.362099	0.414885	0.0430467	0.578745	0.771875	0.234928
ELF3	5	0.0253932	-0.014635	-0.0399008	0.596617	0.867803	0.691698	0.759672	0.963329	0.873199
ELK1	1	-0.0242953	-0.188617	-0.0969179	0.737945	0.753697	0.625306	0.852053	0.924473	0.836278
ELL	7	0.0987441	0.016789	-0.0733924	0.3147	0.960479	0.104786	0.536165	0.993986	0.360964
ELMO2	4	-0.038903	-0.154264	-0.134916	0.479861	0.0624251	0.102063	0.673921	0.476748	0.356881
ELMO3	5	0.107262	0.16302	0.186945	0.166787	0.0332343	0.032526	0.385733	0.429449	0.201988
ELMOD2	3	0.0130979	0.0288983	-0.0858333	0.650528	0.276313	0.555875	0.79294	0.679382	0.793842
ELOA	19	-0.182845	-0.153763	-0.163128	0.0767633	0.140897	0.170846	0.272598	0.562151	0.451239
ELOB	9	-0.316669	-0.184254	0.0526508	0.116357	0.435346	0.292003	0.324064	0.777828	0.584165
ELOC	5	0.360748	0.1499	0.024697	0.0489919	0.569603	0.84552	0.232128	0.847551	0.94431
ELOF1	1	-0.27385	-0.271375	-0.128631	0.310755	0.287734	0.719352	0.531915	0.684135	0.887216
ELOVL1	1	0.201866	0.364326	0.221437	0.239406	0.0961964	0.216833	0.465992	0.523587	0.50573
ELOVL2	1	0.568514	-0.587089	0.289204	0.333232	0.338385	0.537397	0.552234	0.719463	0.783424
ELOVL7	1	-0.0552391	-0.00362433	-0.00833957	0.546138	0.617665	0.672382	0.725485	0.867413	0.862361
ELP1	17	-0.0333531	-0.00539515	-0.00660335	0.39149	0.678365	0.655874	0.60096	0.892495	0.85258
ELP2	5	0.140655	-0.0016604	0.0507642	0.705251	0.585378	0.835127	0.82972	0.855313	0.939316
ELP3	4	-0.0143762	0.122753	0.0507581	0.586729	0.301311	0.676758	0.754024	0.695722	0.86377
ELP4	5	0.32262	0.345958	0.300122	0.0172711	0.0857931	0.0156666	0.174555	0.506995	0.143723
ELP5	2	-0.177666	-0.0429594	-0.0145125	0.369461	0.867678	0.460518	0.584399	0.963329	0.732116
EMB	2	0.112594	-0.0044828	0.0146352	0.427937	0.790388	0.685164	0.631861	0.935452	0.869543
EMC1	17	0.0222106	0.0309228	-0.0196959	0.744053	0.82529	0.828129	0.855261	0.948216	0.93674
EMC10	6	0.0778883	0.0332991	-0.0314918	0.161615	0.958558	0.458773	0.380859	0.993986	0.73127
EMC2	10	-0.0716336	-0.132354	0.0306129	0.320383	0.228848	0.501428	0.541301	0.64911	0.759065
EMC3	6	0.00288644	0.0151796	0.118782	0.943895	0.933068	0.0319973	0.972024	0.98646	0.20142
EMC4	4	-0.15604	-0.038609	0.0298599	0.110475	0.493009	0.665685	0.316122	0.808841	0.858826
EMC6	3	0.172557	0.09467	-0.0212083	0.0831336	0.443928	0.476359	0.281025	0.781208	0.741881
EMC7	7	0.0973117	0.0625633	0.00345396	0.0849758	0.192105	0.934617	0.283021	0.618105	0.976524
EMC8	7	0.00377561	0.108476	0.182683	0.905154	0.780632	0.0744902	0.951975	0.933693	0.307456
EMC9	2	0.236689	0.0405887	-0.00315391	0.132773	0.747906	0.528535	0.343698	0.920665	0.77727
EMD	15	0.108318	-0.0288148	-0.0436575	0.148064	0.544844	0.376304	0.365198	0.835536	0.66494
EMG1	4	0.0453137	-0.026562	-0.027955	0.590357	0.950436	0.842236	0.756368	0.991077	0.942531
EML1	16	-0.0338112	0.0398353	0.0460896	0.385728	0.381924	0.0992011	0.596527	0.749144	0.351565
EML2	7	-0.0218419	0.174215	0.0832137	0.992987	0.0442911	0.0392766	0.996484	0.443943	0.224196
EML3	8	0.20926	0.0896608	0.0619129	0.0949997	0.580402	0.794169	0.295427	0.852859	0.926354
EML4	15	0.0306327	0.0725843	0.106591	0.506691	0.290468	0.0382052	0.694217	0.685118	0.220825
EMSY	8	-0.0468617	0.036396	0.0875978	0.71373	0.702934	0.0744831	0.834092	0.905412	0.307456
ENAH	8	-0.167279	-0.013086	-0.0334053	0.116234	0.994773	0.603638	0.324064	0.999402	0.822405
ENDOD1	8	0.250815	0.0580342	0.0407064	0.0632102	0.460102	0.781217	0.25173	0.790889	0.92013
ENDOG	9	0.112624	0.0144706	-0.0281371	0.274519	0.695624	0.437895	0.499043	0.901224	0.714919
ENGASE	1	0.0368098	-0.0199322	0.0209865	0.871468	0.812573	0.888376	0.932208	0.943354	0.962438
ENKD1	1	-0.00647185	-0.123901	-0.102463	0.95262	0.447961	0.82779	0.976831	0.783383	0.93674
ENO1	25	-0.0597846	-0.0932811	-0.0605111	0.139797	0.131469	0.115861	0.354018	0.554311	0.377888
ENO2	13	-0.0242135	-0.0638203	-0.00402468	0.566308	0.172516	0.652907	0.739029	0.60083	0.850313
ENOPH1	5	0.120444	0.18207	0.151734	0.286383	0.154273	0.165723	0.509801	0.578991	0.444813
ENOSF1	2	-0.204776	0.00436161	-0.019799	0.0186506	0.922576	0.447915	0.179428	0.983588	0.722286
ENPP1	11	0.233712	0.113879	0.0114064	0.0156006	0.413819	0.600258	0.172773	0.770685	0.820917
ENPP4	4	0.113046	0.0634443	-0.0255482	0.0501627	0.194367	0.898469	0.233616	0.619691	0.964174
ENPP5	2	0.531692	0.442794	0.504288	0.00975579	0.0102235	0.0182499	0.15617	0.344213	0.156259
ENSA	10	-0.335566	-0.152718	-0.153046	0.00768364	0.0894162	0.0539858	0.152481	0.513443	0.26247
ENTPD2	4	0.336977	0.14665	-0.0189719	0.0104341	0.311404	0.806594	0.156211	0.704607	0.930057
ENTPD5	1	0.0591924	0.0502204	-0.116908	0.842476	0.471838	0.0129271	0.913354	0.79737	0.132217
ENTPD6	3	0.319148	0.0671866	-0.0111601	0.0201075	0.565348	0.366804	0.184903	0.845693	0.655366
ENTR1	3	-0.197146	-0.099864	-0.00156964	0.0120516	0.0840922	0.652439	0.162097	0.503333	0.850313
ENY2	4	0.0160307	-0.0383173	-0.119727	0.540056	0.648523	0.137699	0.721042	0.87834	0.405283
EP400	18	0.0725042	0.0629879	0.0368048	0.208863	0.329127	0.659788	0.432932	0.712981	0.855249
EPB41	4	-0.06741	-0.117956	-0.28639	0.803923	0.385865	0.11683	0.892784	0.751573	0.37907
EPB41L1	14	0.157102	0.0323788	-0.0326086	0.12675	0.85182	0.402073	0.336342	0.958406	0.688026
EPB41L2	25	0.0579106	0.0371188	0.0623192	0.2497	0.415944	0.23793	0.476382	0.772701	0.529313
EPB41L4B	1	0.428218	0.121208	0.115149	0.0792696	0.451286	0.896669	0.275407	0.784725	0.963475
[truncated: 5,707 more rows]
